# Supplementary material
Source: publisher figshare collection journal article supplement (https://acs.figshare.com/ndownloader/files/3730534)
Supplement: Supplementary file 1 [file 3730534]

 
data_shelx
 
_audit_creation_method            'SHELXL-2014/7'
_shelx_SHELXL_version_number      '2014/7'
_chemical_name_systematic         ?
_chemical_name_common             ?
_chemical_melting_point           ?
_chemical_formula_moiety          'C22 H20 O2 S'
_chemical_formula_sum
 'C22 H20 O2 S' 
_chemical_formula_weight          348.44

loop_
 _atom_type_symbol
 _atom_type_description
 _atom_type_scat_dispersion_real
 _atom_type_scat_dispersion_imag
 _atom_type_scat_source
 'C'  'C'   0.0033   0.0016
 'International Tables Vol C Tables 4.2.6.8 and 6.1.1.4'
 'H'  'H'   0.0000   0.0000
 'International Tables Vol C Tables 4.2.6.8 and 6.1.1.4'
 'O'  'O'   0.0106   0.0060
 'International Tables Vol C Tables 4.2.6.8 and 6.1.1.4'
 'S'  'S'   0.1246   0.1234
 'International Tables Vol C Tables 4.2.6.8 and 6.1.1.4'
 
_space_group_crystal_system       triclinic
_space_group_IT_number            2
_space_group_name_H-M_alt         'P -1'
_space_group_name_Hall            '-P 1'
 
_shelx_space_group_comment
;
The symmetry employed for this shelxl refinement is uniquely defined
by the following loop, which should always be used as a source of
symmetry information in preference to the above space-group names.
They are only intended as comments.
;
 
loop_
 _space_group_symop_operation_xyz
 'x, y, z'
 '-x, -y, -z'
 
_cell_length_a                    6.1450(4)
_cell_length_b                    8.4250(5)
_cell_length_c                    17.6750(8)
_cell_angle_alpha                 95.659(6)
_cell_angle_beta                  95.515(6)
_cell_angle_gamma                 99.965(5)
_cell_volume                      890.87(9)
_cell_formula_units_Z             2
_cell_measurement_temperature     293(2)
_cell_measurement_reflns_used     ?
_cell_measurement_theta_min       ?
_cell_measurement_theta_max       ?
 
_exptl_crystal_description        block
_exptl_crystal_colour             colourless
_exptl_crystal_density_meas       ?
_exptl_crystal_density_method     ?
_exptl_crystal_density_diffrn     1.299          
_exptl_crystal_F_000              368
_exptl_transmission_factor_min    ?
_exptl_transmission_factor_max    ?
_exptl_crystal_size_max           0.500
_exptl_crystal_size_mid           0.350
_exptl_crystal_size_min           0.300
_exptl_absorpt_coefficient_mu     0.194
_shelx_estimated_absorpt_T_min    0.909
_shelx_estimated_absorpt_T_max    0.944
_exptl_absorpt_correction_type    ?
_exptl_absorpt_correction_T_min   ?
_exptl_absorpt_correction_T_max   ?
_exptl_absorpt_process_details    none
_exptl_absorpt_special_details    ?
_diffrn_ambient_temperature       293(2)
_diffrn_radiation_wavelength      0.71073
_diffrn_radiation_type            MoK\a
_diffrn_source                    'fine-focus sealed tube'
_diffrn_measurement_device_type    'Bruker-Nonius KappaCCD'
_diffrn_measurement_method        '\f scans and \w scans'
_diffrn_detector_area_resol_mean  ?
_diffrn_reflns_number             10151
_diffrn_reflns_av_unetI/netI      0.0324
_diffrn_reflns_av_R_equivalents   0.0249
_diffrn_reflns_limit_h_min        -7
_diffrn_reflns_limit_h_max        6
_diffrn_reflns_limit_k_min        -10
_diffrn_reflns_limit_k_max        10
_diffrn_reflns_limit_l_min        -22
_diffrn_reflns_limit_l_max        22
_diffrn_reflns_theta_min          5.019
_diffrn_reflns_theta_max          27.495
_diffrn_reflns_theta_full         25.242
_diffrn_measured_fraction_theta_max   0.966
_diffrn_measured_fraction_theta_full  0.980
_diffrn_reflns_Laue_measured_fraction_max    0.966
_diffrn_reflns_Laue_measured_fraction_full   0.980
_diffrn_reflns_point_group_measured_fraction_max   0.966
_diffrn_reflns_point_group_measured_fraction_full  0.980
_reflns_number_total              3936
_reflns_number_gt                 3025
_reflns_threshold_expression      'I > 2\s(I)'
_reflns_Friedel_coverage          0.000
_reflns_Friedel_fraction_max      .
_reflns_Friedel_fraction_full     .
 
_reflns_special_details
;
 Reflections were merged by SHELXL according to the crystal
 class for the calculation of statistics and refinement.
 
 _reflns_Friedel_fraction is defined as the number of unique
 Friedel pairs measured divided by the number that would be
 possible theoretically, ignoring centric projections and
 systematic absences.
;
 
_computing_data_collection      'COLLECT (Nonius, 2002)'
_computing_cell_refinement      'DIRAX (Duisenberg,1992; Duisenberg et al., 2003)'
_computing_data_reduction       'EVAL (Nonius, 2002; Duisenberg et al., 2000)'
_computing_structure_solution   'SIR2011 (Burla et al., 2012)'
_computing_structure_refinement 'SHELXL-2014/7 (Sheldrick, 2014)'
_computing_molecular_graphics   'ORTEP-3 (Farrugia, 2012)'
_computing_publication_material 'WinGX (Farrugia, 2012) and publCIF (Westrip, 2010)'
_refine_special_details           ?
_refine_ls_structure_factor_coef  Fsqd
_refine_ls_matrix_type            full
_refine_ls_weighting_scheme       calc
_refine_ls_weighting_details
'w=1/[\s^2^(Fo^2^)+(0.0583P)^2^+0.2102P] where P=(Fo^2^+2Fc^2^)/3'
_atom_sites_solution_primary      ?
_atom_sites_solution_secondary    ?
_atom_sites_solution_hydrogens    mixed
_refine_ls_hydrogen_treatment     mixed
_refine_ls_extinction_method      none
_refine_ls_extinction_coef        .
_refine_ls_number_reflns          3936
_refine_ls_number_parameters      229
_refine_ls_number_restraints      0
_refine_ls_R_factor_all           0.0645
_refine_ls_R_factor_gt            0.0456
_refine_ls_wR_factor_ref          0.1239
_refine_ls_wR_factor_gt           0.1129
_refine_ls_goodness_of_fit_ref    1.083
_refine_ls_restrained_S_all       1.083
_refine_ls_shift/su_max           0.001
_refine_ls_shift/su_mean          0.000
 
loop_
 _atom_site_label
 _atom_site_type_symbol
 _atom_site_fract_x
 _atom_site_fract_y
 _atom_site_fract_z
 _atom_site_U_iso_or_equiv
 _atom_site_adp_type
 _atom_site_occupancy
 _atom_site_site_symmetry_order  
 _atom_site_calc_flag
 _atom_site_refinement_flags_posn
 _atom_site_refinement_flags_adp
 _atom_site_refinement_flags_occupancy
 _atom_site_disorder_assembly
 _atom_site_disorder_group
S1 S 0.11727(8) 0.82193(6) 0.80957(3) 0.04627(16) Uani 1 1 d . . . . .
O1 O -0.3844(2) 0.66561(16) 0.75315(7) 0.0474(3) Uani 1 1 d . . . . .
H100 H -0.327(4) 0.763(3) 0.7592(15) 0.071 Uiso 1 1 d . U . . .
O2 O -0.0384(3) 0.93545(16) 0.79056(8) 0.0598(4) Uani 1 1 d . . . . .
C2 C -0.2272(3) 0.58807(19) 0.71554(9) 0.0347(4) Uani 1 1 d . . . . .
C3 C -0.1928(3) 0.65701(19) 0.63924(9) 0.0348(3) Uani 1 1 d . . . . .
C4 C -0.3224(3) 0.4063(2) 0.70012(9) 0.0353(4) Uani 1 1 d . . . . .
C5 C -0.5281(3) 0.3409(2) 0.72107(11) 0.0458(4) Uani 1 1 d . . . . .
H5 H -0.6120 0.4084 0.7451 0.055 Uiso 1 1 calc R U . . .
C6 C 0.2203(3) 0.7530(2) 0.96270(9) 0.0434(4) Uani 1 1 d . . . . .
C7 C -0.3779(3) 0.6592(2) 0.58834(11) 0.0480(4) Uani 1 1 d . . . . .
H7 H -0.5189 0.6198 0.6012 0.058 Uiso 1 1 calc R U . . .
C8 C -0.0098(3) 0.6086(2) 0.76976(10) 0.0406(4) Uani 1 1 d . . . . .
H8 H 0.0993 0.5554 0.7452 0.049 Uiso 1 1 calc R U . . .
C9 C -0.2011(3) 0.3011(2) 0.66485(11) 0.0471(4) Uani 1 1 d . . . . .
H9 H -0.0637 0.3428 0.6499 0.056 Uiso 1 1 calc R U . . .
C10 C -0.4858(4) 0.0722(2) 0.67245(12) 0.0551(5) Uani 1 1 d . . . . .
H10 H -0.5399 -0.0390 0.6637 0.066 Uiso 1 1 calc R U . . .
C11 C 0.1973(4) 0.8381(2) 1.03215(11) 0.0543(5) Uani 1 1 d . . . . .
H11 H 0.0696 0.8814 1.0377 0.065 Uiso 1 1 calc R U . . .
C12 C 0.0394(3) 0.7281(2) 0.89672(10) 0.0475(4) Uani 1 1 d . . . . .
H12 H -0.0918 0.7662 0.9136 0.057 Uiso 1 1 calc R U . . .
C13 C -0.6094(3) 0.1741(3) 0.70623(12) 0.0546(5) Uani 1 1 d . . . . .
H13 H -0.7488 0.1317 0.7194 0.065 Uiso 1 1 calc R U . . .
C14 C 0.0135(3) 0.7178(3) 0.61835(11) 0.0558(5) Uani 1 1 d . . . . .
H14 H 0.1408 0.7181 0.6514 0.067 Uiso 1 1 calc R U . . .
C15 C -0.3567(4) 0.7193(3) 0.51847(12) 0.0588(5) Uani 1 1 d . . . . .
H15 H -0.4830 0.7191 0.4849 0.071 Uiso 1 1 calc R U . . .
C16 C -0.2813(4) 0.1353(2) 0.65162(12) 0.0562(5) Uani 1 1 d . . . . .
H16 H -0.1968 0.0668 0.6287 0.067 Uiso 1 1 calc R U . . .
C17 C -0.0314(4) 0.5572(2) 0.85069(11) 0.0591(6) Uani 1 1 d . . . . .
H17A H 0.0692 0.4848 0.8640 0.071 Uiso 1 1 calc R U . . .
H17B H -0.1826 0.5078 0.8566 0.071 Uiso 1 1 calc R U . . .
C18 C 0.4130(4) 0.6914(3) 0.95608(12) 0.0571(5) Uani 1 1 d . . . . .
H18 H 0.4319 0.6350 0.9099 0.069 Uiso 1 1 calc R U . . .
C19 C -0.1509(4) 0.7787(3) 0.49879(12) 0.0600(5) Uani 1 1 d . . . . .
H19 H -0.1366 0.8187 0.4520 0.072 Uiso 1 1 calc R U . . .
C20 C 0.5528(4) 0.7968(3) 1.08544(12) 0.0631(6) Uani 1 1 d . . . . .
H20 H 0.6646 0.8115 1.1262 0.076 Uiso 1 1 calc R U . . .
C21 C 0.5779(4) 0.7124(3) 1.01704(13) 0.0617(6) Uani 1 1 d . . . . .
H21 H 0.7060 0.6694 1.0119 0.074 Uiso 1 1 calc R U . . .
C22 C 0.0331(4) 0.7785(3) 0.54850(13) 0.0697(7) Uani 1 1 d . . . . .
H22 H 0.1733 0.8196 0.5355 0.084 Uiso 1 1 calc R U . . .
C23 C 0.3641(4) 0.8591(3) 1.09361(12) 0.0653(6) Uani 1 1 d . . . . .
H23 H 0.3469 0.9153 1.1400 0.078 Uiso 1 1 calc R U . . .
 
loop_
 _atom_site_aniso_label
 _atom_site_aniso_U_11
 _atom_site_aniso_U_22
 _atom_site_aniso_U_33
 _atom_site_aniso_U_23
 _atom_site_aniso_U_13
 _atom_site_aniso_U_12
S1 0.0585(3) 0.0380(3) 0.0364(2) 0.00540(18) -0.00225(19) -0.00378(19)
O1 0.0517(7) 0.0430(7) 0.0502(7) -0.0004(6) 0.0173(6) 0.0132(6)
O2 0.0843(10) 0.0384(7) 0.0554(8) 0.0069(6) -0.0012(7) 0.0115(7)
C2 0.0345(8) 0.0367(9) 0.0326(8) 0.0008(7) 0.0033(6) 0.0082(6)
C3 0.0390(8) 0.0322(8) 0.0325(8) 0.0000(6) 0.0012(6) 0.0083(6)
C4 0.0367(8) 0.0365(9) 0.0309(8) 0.0036(6) -0.0014(6) 0.0045(7)
C5 0.0420(9) 0.0495(11) 0.0460(10) 0.0106(8) 0.0049(8) 0.0056(8)
C6 0.0547(10) 0.0391(9) 0.0313(8) 0.0053(7) -0.0009(7) -0.0027(8)
C7 0.0435(10) 0.0521(11) 0.0481(10) 0.0078(9) -0.0018(8) 0.0104(8)
C8 0.0468(9) 0.0340(9) 0.0369(9) 0.0013(7) -0.0055(7) 0.0031(7)
C9 0.0450(10) 0.0422(10) 0.0514(11) -0.0040(8) 0.0074(8) 0.0051(8)
C10 0.0684(13) 0.0368(10) 0.0524(11) 0.0053(9) -0.0089(10) -0.0027(9)
C11 0.0669(13) 0.0480(11) 0.0453(11) 0.0006(9) 0.0004(9) 0.0089(9)
C12 0.0548(11) 0.0489(11) 0.0344(9) 0.0075(8) -0.0005(8) -0.0005(8)
C13 0.0486(11) 0.0556(12) 0.0535(11) 0.0179(10) -0.0010(9) -0.0094(9)
C14 0.0439(10) 0.0802(15) 0.0423(10) 0.0129(10) 0.0034(8) 0.0063(10)
C15 0.0687(13) 0.0622(13) 0.0444(11) 0.0076(9) -0.0133(9) 0.0190(11)
C16 0.0642(13) 0.0419(11) 0.0596(12) -0.0061(9) 0.0027(10) 0.0113(9)
C17 0.0791(14) 0.0453(11) 0.0422(10) 0.0126(9) -0.0161(9) -0.0098(10)
C18 0.0633(13) 0.0627(13) 0.0427(11) 0.0015(9) 0.0049(9) 0.0076(10)
C19 0.0814(15) 0.0639(14) 0.0360(10) 0.0114(9) 0.0088(10) 0.0126(11)
C20 0.0667(14) 0.0641(14) 0.0481(12) 0.0116(10) -0.0131(10) -0.0090(11)
C21 0.0565(12) 0.0657(14) 0.0599(13) 0.0127(11) 0.0009(10) 0.0035(10)
C22 0.0617(13) 0.0972(19) 0.0511(12) 0.0214(12) 0.0167(10) 0.0043(12)
C23 0.0856(16) 0.0616(13) 0.0383(11) -0.0088(9) -0.0079(10) 0.0009(12)
 
_geom_special_details
;
 All esds (except the esd in the dihedral angle between two l.s. planes)
 are estimated using the full covariance matrix.  The cell esds are taken
 into account individually in the estimation of esds in distances, angles
 and torsion angles; correlations between esds in cell parameters are only
 used when they are defined by crystal symmetry.  An approximate (isotropic)
 treatment of cell esds is used for estimating esds involving l.s. planes.
;
 
loop_
 _geom_bond_atom_site_label_1
 _geom_bond_atom_site_label_2
 _geom_bond_distance
 _geom_bond_site_symmetry_2
 _geom_bond_publ_flag
S1 O2 1.5034(15) . ?
S1 C12 1.8647(18) . ?
S1 C8 1.8691(18) . ?
O1 C2 1.4348(19) . ?
O1 H100 0.82(3) . ?
C2 C4 1.529(2) . ?
C2 C3 1.539(2) . ?
C2 C8 1.541(2) . ?
C3 C14 1.382(3) . ?
C3 C7 1.385(2) . ?
C4 C5 1.388(2) . ?
C4 C9 1.393(2) . ?
C5 C13 1.398(3) . ?
C5 H5 0.9300 . ?
C6 C18 1.383(3) . ?
C6 C11 1.392(3) . ?
C6 C12 1.504(2) . ?
C7 C15 1.389(3) . ?
C7 H7 0.9300 . ?
C8 C17 1.546(2) . ?
C8 H8 0.9800 . ?
C9 C16 1.387(3) . ?
C9 H9 0.9300 . ?
C10 C13 1.372(3) . ?
C10 C16 1.376(3) . ?
C10 H10 0.9300 . ?
C11 C23 1.396(3) . ?
C11 H11 0.9300 . ?
C12 C17 1.552(3) . ?
C12 H12 0.9800 . ?
C13 H13 0.9300 . ?
C14 C22 1.390(3) . ?
C14 H14 0.9300 . ?
C15 C19 1.368(3) . ?
C15 H15 0.9300 . ?
C16 H16 0.9300 . ?
C17 H17A 0.9700 . ?
C17 H17B 0.9700 . ?
C18 C21 1.382(3) . ?
C18 H18 0.9300 . ?
C19 C22 1.364(3) . ?
C19 H19 0.9300 . ?
C20 C23 1.367(3) . ?
C20 C21 1.377(3) . ?
C20 H20 0.9300 . ?
C21 H21 0.9300 . ?
C22 H22 0.9300 . ?
C23 H23 0.9300 . ?
 
loop_
 _geom_angle_atom_site_label_1
 _geom_angle_atom_site_label_2
 _geom_angle_atom_site_label_3
 _geom_angle
 _geom_angle_site_symmetry_1
 _geom_angle_site_symmetry_3
 _geom_angle_publ_flag
O2 S1 C12 109.02(9) . . ?
O2 S1 C8 110.56(8) . . ?
C12 S1 C8 77.47(8) . . ?
C2 O1 H100 104.3(17) . . ?
O1 C2 C4 107.94(13) . . ?
O1 C2 C3 109.52(13) . . ?
C4 C2 C3 109.60(12) . . ?
O1 C2 C8 109.34(13) . . ?
C4 C2 C8 107.24(13) . . ?
C3 C2 C8 113.06(13) . . ?
C14 C3 C7 117.66(16) . . ?
C14 C3 C2 123.65(15) . . ?
C7 C3 C2 118.68(15) . . ?
C5 C4 C9 118.13(16) . . ?
C5 C4 C2 121.85(15) . . ?
C9 C4 C2 120.02(14) . . ?
C4 C5 C13 120.21(18) . . ?
C4 C5 H5 119.9 . . ?
C13 C5 H5 119.9 . . ?
C18 C6 C11 118.34(18) . . ?
C18 C6 C12 120.95(17) . . ?
C11 C6 C12 120.71(18) . . ?
C3 C7 C15 121.15(18) . . ?
C3 C7 H7 119.4 . . ?
C15 C7 H7 119.4 . . ?
C2 C8 C17 116.62(15) . . ?
C2 C8 S1 115.62(12) . . ?
C17 C8 S1 91.94(11) . . ?
C2 C8 H8 110.5 . . ?
C17 C8 H8 110.5 . . ?
S1 C8 H8 110.5 . . ?
C16 C9 C4 121.26(17) . . ?
C16 C9 H9 119.4 . . ?
C4 C9 H9 119.4 . . ?
C13 C10 C16 119.64(18) . . ?
C13 C10 H10 120.2 . . ?
C16 C10 H10 120.2 . . ?
C6 C11 C23 120.6(2) . . ?
C6 C11 H11 119.7 . . ?
C23 C11 H11 119.7 . . ?
C6 C12 C17 118.78(16) . . ?
C6 C12 S1 115.71(13) . . ?
C17 C12 S1 91.92(11) . . ?
C6 C12 H12 109.7 . . ?
C17 C12 H12 109.7 . . ?
S1 C12 H12 109.7 . . ?
C10 C13 C5 120.74(18) . . ?
C10 C13 H13 119.6 . . ?
C5 C13 H13 119.6 . . ?
C3 C14 C22 120.81(19) . . ?
C3 C14 H14 119.6 . . ?
C22 C14 H14 119.6 . . ?
C19 C15 C7 120.29(19) . . ?
C19 C15 H15 119.9 . . ?
C7 C15 H15 119.9 . . ?
C10 C16 C9 120.00(19) . . ?
C10 C16 H16 120.0 . . ?
C9 C16 H16 120.0 . . ?
C8 C17 C12 97.90(14) . . ?
C8 C17 H17A 112.2 . . ?
C12 C17 H17A 112.2 . . ?
C8 C17 H17B 112.2 . . ?
C12 C17 H17B 112.2 . . ?
H17A C17 H17B 109.8 . . ?
C21 C18 C6 120.9(2) . . ?
C21 C18 H18 119.5 . . ?
C6 C18 H18 119.5 . . ?
C22 C19 C15 119.34(19) . . ?
C22 C19 H19 120.3 . . ?
C15 C19 H19 120.3 . . ?
C23 C20 C21 120.3(2) . . ?
C23 C20 H20 119.9 . . ?
C21 C20 H20 119.9 . . ?
C20 C21 C18 120.1(2) . . ?
C20 C21 H21 120.0 . . ?
C18 C21 H21 120.0 . . ?
C19 C22 C14 120.7(2) . . ?
C19 C22 H22 119.6 . . ?
C14 C22 H22 119.6 . . ?
C20 C23 C11 119.8(2) . . ?
C20 C23 H23 120.1 . . ?
C11 C23 H23 120.1 . . ?
 
_refine_diff_density_max    0.352
_refine_diff_density_min   -0.305
_refine_diff_density_rms    0.072

_shelx_res_file
;

    shelx.res created by SHELXL-2014/7


TITL sir:    ----  FL_15_fr10-13-1
CELL  0.71073   6.1450   8.4250  17.6750   95.659   95.515   99.965
ZERR     2.00   0.0004   0.0005   0.0008   0.006    0.006    0.005
LATT   1
SFAC  C    H    O    S
UNIT  44   40   4    2
MERG   2
FMAP   2
PLAN   25  0.50  0.50
SIZE   0.5 0.35 0.3
L.S.   8
HTAB
ACTA
BOND $H
WGHT    0.058300    0.210200
FVAR       1.53726
S1    4    0.117267    0.821933    0.809573    11.00000    0.05849    0.03798 =
         0.03643    0.00540   -0.00225   -0.00378
O1    3   -0.384391    0.665613    0.753150    11.00000    0.05165    0.04302 =
         0.05021   -0.00043    0.01727    0.01318
H100  2   -0.327409    0.762648    0.759198    11.00000   -1.50000
O2    3   -0.038350    0.935453    0.790562    11.00000    0.08427    0.03835 =
         0.05538    0.00694   -0.00125    0.01145
C2    1   -0.227160    0.588071    0.715538    11.00000    0.03449    0.03667 =
         0.03259    0.00079    0.00332    0.00815
C3    1   -0.192819    0.657012    0.639243    11.00000    0.03901    0.03217 =
         0.03253    0.00002    0.00124    0.00826
C4    1   -0.322411    0.406296    0.700123    11.00000    0.03669    0.03648 =
         0.03090    0.00357   -0.00144    0.00451
C5    1   -0.528054    0.340947    0.721073    11.00000    0.04204    0.04946 =
         0.04596    0.01056    0.00487    0.00561
AFIX  43
H5    2   -0.612006    0.408397    0.745066    11.00000   -1.20000
AFIX   0
C6    1    0.220334    0.752972    0.962697    11.00000    0.05469    0.03907 =
         0.03135    0.00531   -0.00090   -0.00273
C7    1   -0.377892    0.659207    0.588342    11.00000    0.04352    0.05207 =
         0.04808    0.00783   -0.00180    0.01043
AFIX  43
H7    2   -0.518851    0.619771    0.601154    11.00000   -1.20000
AFIX   0
C8    1   -0.009765    0.608627    0.769757    11.00000    0.04684    0.03397 =
         0.03692    0.00129   -0.00549    0.00308
AFIX  13
H8    2    0.099274    0.555437    0.745152    11.00000   -1.20000
AFIX   0
C9    1   -0.201101    0.301061    0.664846    11.00000    0.04503    0.04219 =
         0.05139   -0.00399    0.00742    0.00514
AFIX  43
H9    2   -0.063714    0.342757    0.649867    11.00000   -1.20000
AFIX   0
C10   1   -0.485774    0.072162    0.672446    11.00000    0.06839    0.03685 =
         0.05240    0.00527   -0.00895   -0.00267
AFIX  43
H10   2   -0.539909   -0.038962    0.663667    11.00000   -1.20000
AFIX   0
C11   1    0.197290    0.838122    1.032152    11.00000    0.06688    0.04802 =
         0.04526    0.00064    0.00036    0.00893
AFIX  43
H11   2    0.069616    0.881432    1.037658    11.00000   -1.20000
AFIX   0
C12   1    0.039441    0.728086    0.896717    11.00000    0.05480    0.04893 =
         0.03442    0.00747   -0.00051   -0.00049
AFIX  13
H12   2   -0.091843    0.766172    0.913648    11.00000   -1.20000
AFIX   0
C13   1   -0.609378    0.174077    0.706226    11.00000    0.04862    0.05559 =
         0.05354    0.01785   -0.00100   -0.00939
AFIX  43
H13   2   -0.748827    0.131664    0.719393    11.00000   -1.20000
AFIX   0
C14   1    0.013504    0.717786    0.618349    11.00000    0.04392    0.08021 =
         0.04229    0.01288    0.00338    0.00632
AFIX  43
H14   2    0.140822    0.718060    0.651415    11.00000   -1.20000
AFIX   0
C15   1   -0.356709    0.719280    0.518472    11.00000    0.06874    0.06224 =
         0.04439    0.00760   -0.01333    0.01904
AFIX  43
H15   2   -0.483018    0.719124    0.484933    11.00000   -1.20000
AFIX   0
C16   1   -0.281254    0.135271    0.651624    11.00000    0.06415    0.04194 =
         0.05964   -0.00615    0.00273    0.01129
AFIX  43
H16   2   -0.196794    0.066754    0.628689    11.00000   -1.20000
AFIX   0
C17   1   -0.031388    0.557183    0.850689    11.00000    0.07906    0.04531 =
         0.04219    0.01261   -0.01610   -0.00982
AFIX  23
H17A  2    0.069194    0.484756    0.864036    11.00000   -1.20000
H17B  2   -0.182609    0.507826    0.856609    11.00000   -1.20000
AFIX   0
C18   1    0.413035    0.691365    0.956077    11.00000    0.06334    0.06271 =
         0.04266    0.00147    0.00491    0.00758
AFIX  43
H18   2    0.431914    0.634995    0.909939    11.00000   -1.20000
AFIX   0
C19   1   -0.150918    0.778655    0.498789    11.00000    0.08136    0.06388 =
         0.03605    0.01138    0.00877    0.01263
AFIX  43
H19   2   -0.136603    0.818710    0.451980    11.00000   -1.20000
AFIX   0
C20   1    0.552753    0.796814    1.085438    11.00000    0.06670    0.06409 =
         0.04805    0.01160   -0.01311   -0.00902
AFIX  43
H20   2    0.664556    0.811530    1.126230    11.00000   -1.20000
AFIX   0
C21   1    0.577930    0.712372    1.017042    11.00000    0.05648    0.06569 =
         0.05993    0.01266    0.00087    0.00348
AFIX  43
H21   2    0.706044    0.669431    1.011869    11.00000   -1.20000
AFIX   0
C22   1    0.033126    0.778537    0.548498    11.00000    0.06171    0.09723 =
         0.05109    0.02144    0.01666    0.00432
AFIX  43
H22   2    0.173322    0.819561    0.535515    11.00000   -1.20000
AFIX   0
C23   1    0.364104    0.859084    1.093610    11.00000    0.08560    0.06157 =
         0.03827   -0.00877   -0.00786    0.00093
AFIX  43
H23   2    0.346944    0.915275    1.140001    11.00000   -1.20000

AFIX   0
HKLF    4

REM  sir:    ----  FL_15_fr10-13-1
REM R1 =  0.0456 for    3025 Fo > 4sig(Fo)  and  0.0645 for all    3936 data
REM    229 parameters refined using      0 restraints

END

WGHT      0.0582      0.2081

REM Instructions for potential hydrogen bonds
HTAB O1 S1
HTAB O1 O2

REM Highest difference peak  0.352,  deepest hole -0.305,  1-sigma level  0.072
Q1    4  -0.2130  0.6254  0.6746  11.00000  0.75    0.35
Q2    4   0.1360  0.7492  0.9335  11.00000  0.75    0.25
Q3    4  -0.0668  0.6225  0.6115  11.00000  0.75    0.25
Q4    4  -0.1157  0.6034  0.7346  11.00000  0.75    0.22
Q5    4  -0.1175  0.7207  0.6407  11.00000  0.75    0.20
Q6    4  -0.2946  0.6975  0.6246  11.00000  0.75    0.20
Q8    4  -0.0050  0.4799  0.8666  11.00000  0.75    0.19
Q9    4  -0.3291  0.2668  0.7922  11.00000  0.75    0.19
Q10   4   0.1620  0.6364  0.6372  11.00000  0.75    0.19
Q12   4   0.2438  0.6431  0.8757  11.00000  0.75    0.18
Q13   4   0.1557  0.7869  0.6730  11.00000  0.75    0.18
Q14   4  -0.0712  0.8136  0.9117  11.00000  0.75    0.17
Q15   4  -0.2731  0.6135  0.6119  11.00000  0.75    0.17
Q16   4   0.1884  0.7274  0.6872  11.00000  0.75    0.17
Q17   4  -0.1344  0.4431  0.8570  11.00000  0.75    0.17
Q20   4  -0.2795  0.5347  0.8605  11.00000  0.75    0.17
Q21   4   0.3701  0.5488  0.8917  11.00000  0.75    0.17
Q22   4   0.0766  0.7935  0.8610  11.00000  0.75    0.16
Q23   4   0.4874  0.6638  1.1599  11.00000  0.75    0.16
Q24   4   0.2257  0.8226  0.9763  11.00000  0.75    0.16
Q25   4   0.0058  0.6325  0.8770  11.00000  0.75    0.16
;
_shelx_res_checksum   98004

_shelx_hkl_file
;
  -2   0   0 1973.91   49.22   4
  -2   0   0 1942.89   51.77   1
   2   0   0 1823.46   53.30   1
  -3   0   0 136.284   4.064   4
  -3   0   0 132.537   5.152   1
   3   0   0 127.298   5.093   1
  -4   0   0 21.7966  2.5339   1
  -4   0   0 18.8234  3.4804   2
   4   0   0 27.8511  2.5682   1
  -5   0   0 367.097  13.947   2
  -5   0   0 385.975  12.822   1
   5   0   0 391.242  12.791   1
  -6   0   0 10.9521  3.3768   1
   6   0   0 12.0742  3.0381   1
  -7   0   0 6.11747 5.74137   3
  -7   0   0 0.49213 4.90024   2
  -7   1   0 2.50188 4.70679   2
  -7   1   0 -5.2626  5.6698   3
   6  -1   0 10.4445  3.1381   1
  -6   1   0 -0.3034  4.2893   2
  -6   1   0 4.15975 2.86509   1
  -6   1   0 2.45994 5.54682   3
   5  -1   0 241.863   9.351   1
  -5   1   0 261.652   9.606   1
  -5   1   0 236.472  10.408   3
   4  -1   0 526.400  16.437   1
  -4   1   0 515.142  16.366   1
  -4   1   0 547.395  17.373   3
   3  -1   0 -0.8625  1.1648   1
   2  -1   0 4870.61  137.88   1
  -2   1   0 5091.81  129.08   3
  -2   1   0 4642.95  130.53   4
  -2   1   0 5306.30  134.65   1
  -2  -1   0 5091.90  141.09   1
  -2  -1   0 5380.46  134.61   4
  -2  -1   0 5182.55  136.28   2
   2   1   0 5335.16  134.77   4
   2   1   0 5329.23  147.14   1
  -3  -1   0 880.772  24.941   1
  -3  -1   0 880.271  25.287   2
  -3  -1   0 884.873  23.476   4
   3   1   0 901.620  24.975   1
   3   1   0 849.185  23.399   4
  -4  -1   0 87.2939  4.3127   1
  -4  -1   0 90.1277  3.6481   4
  -4  -1   0 83.2109  5.3168   2
   4   1   0 86.2404  4.3150   1
  -5  -1   0 110.039   5.317   1
  -5  -1   0 106.090   7.158   2
  -5  -1   0 123.900   5.715   1
  -5  -1   0 117.497   4.448   4
  -6  -1   0 52.8201  5.7030   2
  -6  -1   0 54.1437  4.1273   1
  -7  -1   0 14.7006  5.6256   2
  -7  -1   0 12.2901  4.8018   3
  -7   2   0 20.4525  3.9822   1
  -7   2   0 12.8467  4.3348   3
   6  -2   0 0.93943 3.11814   1
  -6   2   0 -3.3136  3.6863   3
  -6   2   0 1.30939 3.32364   1
   5  -2   0 76.7285  6.0048   1
  -5   2   0 75.7920  6.2798   1
   4  -2   0 776.285  23.037   1
  -4   2   0 756.087  23.008   1
  -4   2   0 763.562  23.224   3
   3  -2   0 4.86811 1.99953   1
  -3   2   0 1.07606 2.78080   1
  -3   2   0  4.8534 12.5454   3
  -3   2   0 6.12374 0.94225   4
   2  -2   0 9.27348 1.63612   3
   2  -2   0 11.6418  2.1117   1
  -2   2   0 12.3210  1.3349   4
  -2   2   0 9.78565 2.33870   3
  -2   2   0 8.93370 1.68959   1
   1  -2   0 3678.85   86.47   4
   1  -2   0 3057.52   87.62   3
   1  -2   0 3247.99   93.99   1
  -1   2   0 3596.60   93.33   1
  -1   2   0 3690.86   87.86   3
  -1   2   0 3060.04   86.25   4
  -1  -2   0 4758.41  132.39   1
  -1  -2   0 4779.04  121.40   4
  -1  -2   0 4683.32  127.83   2
   1   2   0 4830.31  121.96   4
   1   2   0 4600.19  124.99   2
   1   2   0 4855.70  127.11   1
  -2  -2   0 31.4607  3.4182   2
  -2  -2   0 35.6858  3.1977   1
  -2  -2   0 32.2064  2.3841   1
  -2  -2   0 33.7181  2.6851   4
   2   2   0 29.8678  2.9579   2
   2   2   0 39.0758  2.4636   4
  -3  -2   0 318.129  11.513   2
  -3  -2   0 331.671  10.311   4
  -3  -2   0 328.485  10.590   1
  -3  -2   0 343.700  10.640   1
   3   2   0 327.117  10.246   4
  -4  -2   0 127.843   5.302   1
  -4  -2   0 111.810   6.198   2
  -4  -2   0 120.052   5.078   4
  -4  -2   0 119.376   5.331   1
   4   2   0 121.248   5.026   4
  -5  -2   0 146.737   6.281   1
  -5  -2   0 150.725   6.512   1
  -5  -2   0 144.914   8.241   2
  -5  -2   0 141.089   5.830   4
  -6  -2   0 4.31935 2.52942   1
  -7  -2   0 18.4077  4.6753   2
  -7   3   0 20.1021  4.2607   1
  -7   3   0 17.9349  6.3556   3
   6  -3   0 253.244  11.078   1
  -6   3   0 262.120  11.134   1
  -6   3   0 254.115  12.056   3
   5  -3   0 1231.43   36.28   1
  -5   3   0 1189.81   36.29   3
  -5   3   0 1225.19   36.33   1
   4  -3   0 178.636   7.941   1
  -4   3   0 179.127   5.750   4
  -4   3   0 181.296   8.051   3
  -4   3   0 186.839   8.137   1
   3  -3   0 150.093   6.649   1
  -3   3   0 163.849   5.450   4
  -3   3   0 159.777   7.096   3
  -3   3   0 154.428   7.035   1
   2  -3   0 5156.30  134.17   3
   2  -3   0 5063.65  131.71   4
   2  -3   0 5204.89  143.37   1
  -2   3   0 5267.59  133.17   4
  -2   3   0 5183.19  139.31   1
  -2   3   0 5145.24  134.21   3
   1  -3   0 1618.96   49.57   1
   1  -3   0 1744.16   46.00   4
   1  -3   0 1797.61   46.41   3
  -1   3   0 1830.53   46.06   4
  -1   3   0 1763.76   48.67   1
  -1   3   0 1781.13   46.49   3
   0  -3   0 67.6509  3.9695   4
   0  -3   0 66.0965  3.2880   3
   0  -3   0 67.5700  3.6931   1
   0   3   0 63.6581  4.0007   1
   0   3   0 67.6617  3.4259   4
  -1  -3   0 1945.40   53.25   1
  -1  -3   0 1914.22   51.01   4
   1   3   0 2001.98   51.10   4
   1   3   0 1900.37   51.76   2
   1   3   0 1930.65   53.32   1
  -2  -3   0 641.209  19.840   2
  -2  -3   0 680.031  19.338   4
  -2  -3   0 686.793  19.772   1
   2   3   0 675.687  19.322   4
   2   3   0 659.253  19.894   2
   2   3   0 664.934  19.826   1
  -3  -3   0 191.188   7.152   1
  -3  -3   0 189.587   8.115   2
  -3  -3   0 187.512   7.214   4
  -3  -3   0 183.622   7.253   1
   3   3   0 176.205   8.046   2
   3   3   0 185.324   7.362   4
  -4  -3   0 123.927   5.619   1
  -4  -3   0 132.050   5.810   1
  -4  -3   0 122.953   7.455   2
  -4  -3   0 126.881   5.997   4
   4   3   0 124.515   5.919   4
  -5  -3   0 14.2538  2.7096   1
  -5  -3   0 14.3481  2.9365   4
  -5  -3   0 15.4897  3.8760   2
  -5  -3   0 18.8566  2.5498   1
   5   3   0 16.1172  2.9748   4
  -6  -3   0 39.5192  6.0457   2
  -7  -3   0 13.1262  5.8623   2
  -7   4   0 -8.5865  6.2970   3
  -7   4   0 -5.4449  3.6694   1
  -6   4   0 15.5543  4.6233   1
   5  -4   0 96.7295  6.6707   1
  -5   4   0 94.7424  3.7593   4
  -5   4   0 88.5370  7.0128   1
  -5   4   0 88.0814  6.4530   3
   4  -4   0 156.846   7.888   1
  -4   4   0 174.654   8.139   1
  -4   4   0 160.421   5.939   4
  -4   4   0 166.051   7.966   3
   3  -4   0 200.840  11.226   1
   3  -4   0 210.006   8.287   3
  -3   4   0 206.083   7.226   4
  -3   4   0 207.830   8.725   1
  -3   4   0 200.945   8.440   3
   2  -4   0 265.639  10.033   1
   2  -4   0 272.729   9.219   4
   2  -4   0 272.928   9.075   3
  -2   4   0 261.696  10.039   1
  -2   4   0 246.143  20.845   3
  -2   4   0 261.002   8.948   4
   1  -4   0 2107.58   58.74   1
   1  -4   0 2131.95   55.88   4
   1  -4   0 2175.93   56.10   3
  -1   4   0 2117.32   56.16   3
  -1   4   0 2002.82   58.79   1
  -1   4   0 2166.62   55.78   4
   0  -4   0 823.720  23.019   3
   0  -4   0 809.898  23.511   4
   0  -4   0 821.236  24.450   1
   0   4   0 827.181  23.405   4
   0   4   0 832.889  24.545   1
  -1  -4   0 13.5872  2.4490   1
  -1  -4   0 11.2250  5.0786   4
   1   4   0 13.8437  2.8917   4
   1   4   0 15.9573  3.4427   2
   1   4   0 14.5441 10.6681   1
  -2  -4   0 2.34296 2.28424   1
  -2  -4   0 -1.5363  2.9856   4
   2   4   0 0.33429 2.93895   4
   2   4   0 -0.7289  2.6618   1
   2   4   0 -1.1030  2.7034   2
  -3  -4   0 251.507   9.316   1
  -3  -4   0 246.559   9.794   1
  -3  -4   0 258.720  10.079   4
   3   4   0 246.365   9.986   4
   3   4   0 268.820  10.784   2
  -4  -4   0 11.0489  3.2512   4
  -4  -4   0 11.4803  2.4493   1
  -4  -4   0 8.66963 2.66836   1
  -4  -4   0 21.0577  4.7226   2
   4   4   0 15.9122  3.4944   4
  -5  -4   0 167.896   7.814   4
  -5  -4   0 162.016   7.365   1
  -5  -4   0 186.558  10.156   2
   5   4   0 154.125   7.671   4
  -6  -4   0 30.7399  6.3212   2
  -7   5   0 -7.3528  6.3419   3
  -7   5   0 -1.7271  3.9366   1
  -6   5   0 32.2423  5.2461   1
  -6   5   0 49.0432  6.6224   3
  -5   5   0 111.730   6.804   3
  -5   5   0 104.284   6.970   1
  -5   5   0 103.885   4.763   4
   4  -5   0 20.1090  3.5961   1
  -4   5   0 26.1888  2.7981   4
  -4   5   0 29.0395  4.7896   3
  -4   5   0 33.5579  5.0820   1
   3  -5   0 40.5349  3.5183   3
   3  -5   0 38.2604 11.8430   1
  -3   5   0 39.3108  4.6370   3
  -3   5   0 46.0006  4.6164   1
  -3   5   0 47.8434  3.9507   4
   2  -5   0 171.176   7.524   4
   2  -5   0 173.043   6.967   3
   2  -5   0 176.393   8.113   1
  -2   5   0 176.171   7.226   4
  -2   5   0 163.840   8.133   1
  -2   5   0 170.438   7.261   3
   1  -5   0 843.712  24.092   3
   1  -5   0 836.439  25.842   1
   1  -5   0 830.147  24.512   4
  -1   5   0 840.748  24.236   3
  -1   5   0 874.869  24.522   4
  -1   5   0 868.861  26.214   1
   0  -5   0 31.2811  3.3768   4
   0  -5   0 36.8373  3.2639   1
   0  -5   0 37.7281  2.9686   3
   0   5   0 35.4732  4.1753   1
   0   5   0 48.1313  3.9917   4
  -1  -5   0 213.264   8.558   1
  -1  -5   0 217.282   7.960   3
  -1  -5   0 196.581   8.362   4
   1   5   0 199.620   8.453   4
   1   5   0 197.428   8.688   1
   1   5   0 213.660   8.798   2
  -2  -5   0 482.554  15.908   4
  -2  -5   0 494.909  16.135   1
   2   5   0 489.768  16.257   1
   2   5   0 468.911  16.169   2
   2   5   0 480.591  16.035   4
  -3  -5   0 74.8517  4.6302   1
  -3  -5   0 75.3935  5.1213   1
  -3  -5   0 77.9330  5.2461   4
   3   5   0 75.4219  5.4374   4
  -4  -5   0 171.155   8.033   1
  -4  -5   0 196.064   9.282   4
  -4  -5   0 196.950   8.674   1
   4   5   0 170.850   8.434   4
  -5  -5   0 12.7025  3.2461   1
  -5  -5   0 18.5519  3.3890   4
  -7   6   0 7.64497 3.98310   1
  -7   6   0 3.84674 6.20554   3
  -5   6   0 24.6599  4.1241   3
  -5   6   0 36.0646  5.7217   1
  -5   6   0 22.3685  2.8762   4
   4  -6   0 637.816  20.907   3
  -4   6   0 682.078  22.601   1
  -4   6   0 671.483  21.124   3
  -4   6   0 649.129  19.974   4
   3  -6   0 295.365  10.817   3
   3  -6   0 281.716  12.203   1
  -3   6   0 283.582  12.334   1
  -3   6   0 284.769  10.969   3
  -3   6   0 286.817  10.498   4
   2  -6   0 43.1524  4.9404   4
   2  -6   0 36.9561  4.6154   1
   2  -6   0 42.9246  3.2725   3
  -2   6   0 38.6569  3.9553   4
  -2   6   0 42.3192  4.3133   3
  -2   6   0 44.4202  4.8596   1
   1  -6   0 3.44337 4.26000   4
   1  -6   0 8.76773 6.45346   1
  -1   6   0 3.56444 4.45705   1
  -1   6   0 4.73206 3.47534   4
  -1   6   0 13.1523  3.4715   3
   0  -6   0 188.722   8.713   1
   0  -6   0 178.426   8.836   4
   0  -6   0 190.826   7.557   3
   0   6   0 186.951   8.535   4
   0   6   0 183.735   8.908   1
  -1  -6   0 357.332  12.891   1
  -1  -6   0 313.587  12.663   4
  -1  -6   0 336.342  11.813   3
   1   6   0 343.429  12.758   4
   1   6   0 335.213  12.622   2
   1   6   0 341.182  12.745   1
  -2  -6   0 8.38420 4.77079   4
   2   6   0  6.2004 16.8177   1
   2   6   0 5.39439 4.75532   4
  -3  -6   0 73.9255  6.7886   4
  -3  -6   0 84.4402  5.6005   1
   3   6   0 77.4850  6.2831   1
  -4  -6   0 251.152  10.649   1
  -4  -6   0 241.379  11.138   4
  -5  -6   0 26.5144  4.5580   4
  -6   7   0 9.51291 5.69185   1
  -6   7   0 15.9545  5.1616   3
  -5   7   0 3.31362 3.65901   3
  -5   7   0 6.17771 5.48989   1
  -4   7   0 14.6214  5.7679   1
  -4   7   0 12.3042  4.9094   3
   3  -7   0 48.2213  4.3802   3
  -3   7   0 55.2247  4.6492   3
  -3   7   0 38.6768  6.2930   1
  -3   7   0 56.8587  5.0509   4
   2  -7   0 1065.72   31.55   4
   2  -7   0 1082.60   30.98   3
  -2   7   0 1108.36   31.37   3
  -2   7   0 1024.64   33.24   1
  -2   7   0 1050.47   31.41   4
   1  -7   0 0.91791 2.40248   3
   1  -7   0 -4.6540  4.3896   4
  -1   7   0 -1.2770  2.8674   1
   0  -7   0 5.70827 4.92667   4
   0  -7   0 1.88825 2.97827   3
   0   7   0 8.43824 3.56207   1
  -1  -7   0 23.0343  3.2092   3
  -1  -7   0 17.3623  4.0580   4
   1   7   0 20.8302  4.8777   1
  -2  -7   0 115.804   7.208   4
   2   7   0 125.705   7.480   1
  -3  -7   0 114.061   8.216   4
   3   7   0 132.240   7.585   1
  -4  -7   0 -6.4567  5.2940   4
  -4  -7   0 -10.185   4.468   1
  -5  -7   0 8.18483 4.91001   4
  -6   8   0 6.37824 5.60988   3
  -6   8   0 -4.9769  6.2304   1
  -5   8   0 27.5424  5.4483   3
  -4   8   0 64.1453  7.3289   1
  -4   8   0 73.2083  6.3250   3
  -3   8   0 -0.5145  4.3507   1
  -3   8   0 -1.1796  3.1311   3
   2  -8   0 162.884   9.219   4
   2  -8   0 140.330   7.263   3
  -2   8   0 136.613   8.671   1
  -2   8   0 140.035   7.734   3
   1  -8   0 299.994  11.465   3
   1  -8   0 306.306  12.892   4
  -1   8   0 319.705  13.808   1
   0  -8   0 341.292  14.275   4
   0  -8   0 303.697  12.013   3
   0   8   0 354.892  14.688   1
  -1  -8   0 74.4600  7.5615   4
  -2  -8   0 19.7426  6.2237   4
   2   8   0 12.9980  5.4497   1
  -3  -8   0 122.985   8.980   4
   3   8   0 111.862   7.548   1
  -4  -8   0 53.7875  7.6667   4
  -5   9   0 -0.8565  6.0245   1
  -5   9   0 3.49979 5.42533   3
  -4   9   0 2.06257 4.16013   3
  -4   9   0 5.04372 5.64040   1
  -3   9   0 2.88942 4.41630   3
  -3   9   0 5.97600 4.81300   1
  -2   9   0 0.89340 4.34116   1
   1  -9   0 85.4977  7.5673   4
   0  -9   0 99.8891  7.7706   4
   0   9   0 103.958   8.475   1
   1   9   0 78.7383  8.1262   1
  -2  -9   0 48.3553  6.1326   4
   2   9   0 51.8392  6.8958   1
   3   9   0 13.5939  5.9676   1
  -4  10   0 15.3175  6.8620   1
  -4  10   0 11.4851  5.3205   3
  -3  10   0 17.9918  5.0913   3
  -3  10   0 6.57436 5.76552   1
  -2  10   0 50.1660  8.0246   1
  -1  10   0 21.0660  6.9853   1
   0  10   0 6.96062 6.09287   1
   1  10   0 16.3314  5.9137   1
   1  10  -1 194.220  11.825   1
   0  10  -1 56.5346  6.9883   1
  -1  10  -1 120.216   9.065   1
   1 -10   1 138.194   9.355   4
  -2  10  -1 6.58352 6.39591   1
  -3  10  -1 6.01907 6.33042   1
  -3  10  -1 11.2940  4.6811   3
  -4  10  -1 1.86896 5.84310   1
  -4  10  -1 -0.7221  4.6982   3
   3   9  -1 60.1865  7.2778   1
   2   9  -1 17.3346  5.4932   1
   1   9  -1 5.04002 5.83381   1
   0   9  -1 99.8990  8.3340   1
  -1   9  -1 391.730  16.880   1
  -2   9  -1 6.66085 5.48030   1
  -3   9  -1 -5.3073  4.4282   3
  -3   9  -1 -2.5508  5.2990   1
  -4   9  -1 12.8290  5.1718   1
  -4   9  -1 21.8378  4.7614   3
  -5   9  -1 24.0950  5.4083   3
  -4  -8   1 74.3145  7.3581   4
   3   8  -1 1.30369 3.37652   1
  -3  -8   1 9.60890 5.58568   4
   2   8  -1 88.9822  7.5956   1
  -2  -8   1 83.7528  7.0998   4
  -1  -8   1 86.3145  5.6804   3
  -1  -8   1 83.7946  7.6330   4
   0   8  -1 13.5893  7.6399   1
   0  -8   1 18.3654  5.5864   4
  -1   8  -1 0.36365 5.22938   1
   1  -8   1 7.73170 2.86937   3
   1  -8   1 13.5425  5.9110   4
  -2   8  -1 3.77033 3.53531   3
  -2   8  -1 -1.6722  5.3623   1
   2  -8   1 -2.8859  4.1959   4
  -3   8  -1 134.269   9.315   1
  -3   8  -1 147.407   7.906   3
   3  -8   1 159.448   8.853   4
   3  -8   1 134.084   7.069   3
  -4   8  -1 16.4964  4.5857   3
  -4   8  -1 20.5714  4.7472   1
  -5   8  -1 6.09255 5.32575   1
  -5   8  -1 2.77923 4.57287   3
  -6   8  -1 31.5480  5.6550   1
  -6   8  -1 39.2024  6.0217   3
  -5  -7   1 58.3485  6.7265   4
  -4  -7   1 156.571   9.673   4
  -4  -7   1 153.109   8.254   1
   3   7  -1 22.7456  3.8830   1
  -3  -7   1 20.2939  4.3744   4
   2   7  -1 0.97121 4.07459   1
  -2  -7   1 0.64728 4.34462   4
   1   7  -1 148.315   8.003   1
  -1  -7   1 159.154   8.190   4
  -1  -7   1 153.371   6.937   3
  -1  -7   1 147.945   8.195   1
   0   7  -1 426.028  15.759   1
   0  -7   1 402.801  15.138   4
   0  -7   1 388.312  13.300   3
  -1   7  -1 0.71052 4.20509   1
   1  -7   1 7.97248 2.18809   3
   1  -7   1 4.96307 3.18957   4
  -2   7  -1 13.9267  5.5028   4
  -2   7  -1 24.0506  4.3712   3
  -2   7  -1 19.9630 14.6744   1
   2  -7   1 14.2333  5.2707   4
   2  -7   1 19.1316  2.9776   3
  -3   7  -1 -4.7748  3.5259   1
  -3   7  -1 1.81420 3.66931   3
  -3   7  -1 2.10565 3.06410   4
   3  -7   1 -3.1736  4.1055   4
   3  -7   1 3.34745 2.72383   3
  -4   7  -1 246.993  12.120   1
  -4   7  -1 223.191   9.535   4
  -4   7  -1 241.495  10.550   3
  -5   7  -1 4.92527 3.92684   1
  -5   7  -1 0.34093 4.25853   3
  -6   7  -1 15.4109  5.2255   3
  -6   7  -1 16.5759  4.7336   1
  -5  -6   1 44.6120  5.1106   4
  -4  -6   1 148.439   8.581   4
  -4  -6   1 142.662   7.354   1
   3   6  -1 376.947  14.063   1
  -3  -6   1 393.123  14.702   4
  -3  -6   1 373.134  13.721   1
   2   6  -1 67.5597  5.5743   4
   2   6  -1 69.4180  5.5938   1
  -2  -6   1 74.9816  5.2064   1
  -2  -6   1 78.8871  6.2185   4
  -2  -6   1 71.3303  4.8747   3
   1   6  -1 8.99245 3.75600   4
   1   6  -1 15.7622  3.1218   1
   1   6  -1 11.6794  3.7333   2
  -1  -6   1 17.6464  2.4242   3
  -1  -6   1 20.8834  4.6661   4
  -1  -6   1 18.3666  3.5448   1
   0   6  -1 313.209  11.874   1
   0   6  -1 279.305  10.847   4
   0  -6   1 285.792  11.319   1
   0  -6   1 288.855   9.993   3
   0  -6   1 281.336  11.049   4
  -1   6  -1 244.410   9.703   4
  -1   6  -1 247.612   9.020   3
  -1   6  -1 240.113  10.388   1
   1  -6   1 240.238  10.264   1
   1  -6   1 244.626  10.072   4
   1  -6   1 241.396   8.724   3
  -2   6  -1 7.11959 3.41349   3
  -2   6  -1 4.25161 3.42546   1
  -2   6  -1 5.21532 3.05561   4
   2  -6   1 4.66223 3.55338   1
   2  -6   1 5.56919 2.39852   3
   2  -6   1 10.4934  4.0283   4
  -3   6  -1 55.3011  4.4686   4
  -3   6  -1 54.9741  6.2811   1
  -3   6  -1 55.3473  5.0255   3
   3  -6   1 59.3843  4.3883   3
   3  -6   1 61.9128  4.6791   4
   3  -6   1 53.3003  7.1907   1
  -4   6  -1 25.6036  5.8945   1
  -4   6  -1 23.8466  3.9238   3
  -5   6  -1 0.45984 1.89299   4
  -5   6  -1 0.62758 4.66233   1
  -5   6  -1 -0.8465  3.7495   3
  -6   6  -1 35.9202  5.9339   1
  -6   6  -1 40.0550  6.1772   3
  -7   6  -1 5.54878 5.56208   1
  -7   6  -1 18.1129  6.7171   3
  -6  -5   1 13.2689  4.8596   2
  -5  -5   1 59.4914  4.4467   1
  -5  -5   1 57.6568  5.5504   4
   4   5  -1 382.652  14.389   4
  -4  -5   1 387.172  13.537   1
  -4  -5   1 407.101  14.533   4
  -4  -5   1 382.317  13.553   1
   3   5  -1 323.157  11.940   1
   3   5  -1 311.528  11.894   4
  -3  -5   1 334.582  12.543   4
  -3  -5   1 327.122  11.668   1
   2   5  -1 15.1129  3.5245   1
   2   5  -1 8.20100 3.47245   2
   2   5  -1 15.0030  3.5112   4
  -2  -5   1 16.6660  3.0488   1
   1   5  -1 168.402   7.635   4
   1   5  -1 174.212   7.697   1
   1   5  -1 164.595   7.710   2
  -1  -5   1 165.301   7.226   1
  -1  -5   1 173.323   7.829   4
  -1  -5   1 177.099   6.838   3
   0   5  -1 78.0017  5.1700   1
   0   5  -1 81.0083  4.6135   4
   0  -5   1 80.5184  4.9803   1
   0  -5   1 78.2470  4.0266   3
   0  -5   1 78.0215  5.3404   4
  -1   5  -1 1086.77   29.84   4
  -1   5  -1 1023.01   29.20   3
  -1   5  -1 1047.32   31.61   1
   1  -5   1 1040.53   29.10   3
   1  -5   1 1055.81   31.47   1
   1  -5   1 1086.46   29.99   4
  -2   5  -1 136.752   5.942   3
  -2   5  -1 129.605   5.956   4
  -2   5  -1 121.493   6.435   1
   2  -5   1 123.917   6.215   4
   2  -5   1 117.604   6.264   1
   2  -5   1 129.032   5.562   3
  -3   5  -1 1183.63   33.78   3
  -3   5  -1 1230.63   36.05   1
  -3   5  -1 1167.92   32.80   4
   3  -5   1 1185.46   32.94   4
   3  -5   1 1176.07   35.84   1
   3  -5   1 1234.02   33.84   3
  -4   5  -1 84.0611  4.3630   4
  -4   5  -1 95.6504  6.6025   1
  -4   5  -1 92.1968  6.1090   3
   4  -5   1 81.5214  6.0126   1
  -5   5  -1 58.3711  5.2093   3
  -5   5  -1 60.0481  5.2985   1
  -5   5  -1 54.8963  3.2046   4
  -6   5  -1 -1.6347  4.5598   3
  -6   5  -1 2.03331 4.37576   1
  -7   5  -1 18.2713  5.5807   1
  -7   5  -1 31.6946  6.8632   3
  -6  -4   1 37.0602  5.6209   2
   5   4  -1 174.318   8.279   4
  -5  -4   1 187.743  10.148   2
  -5  -4   1 180.181   8.268   4
  -5  -4   1 183.436   7.553   1
   4   4  -1 3.41888 3.47711   4
  -4  -4   1 5.09519 2.22635   1
  -4  -4   1 2.58674 2.27300   1
  -4  -4   1 7.28194 4.71466   2
   3   4  -1 820.852  25.418   2
   3   4  -1 849.231  24.561   4
  -3  -4   1 809.723  25.426   2
  -3  -4   1 832.959  24.473   4
  -3  -4   1 816.364  24.474   1
  -3  -4   1 857.572  24.761   1
   2   4  -1 228.352   8.700   4
   2   4  -1 230.101   9.039   2
   2   4  -1 236.780   8.764   1
  -2  -4   1 232.832   9.108   4
  -2  -4   1 241.800   8.657   1
   1   4  -1 3861.14  104.36   2
   1   4  -1 4094.57  107.87   1
   1   4  -1 3928.43  102.85   4
  -1  -4   1 4049.57  107.75   1
  -1  -4   1 3943.11  103.00   4
   0   4  -1 14.5589  3.1724   1
   0  -4   1 10.0730  2.1833   1
   0  -4   1 13.6455  2.3667   3
  -1   4  -1 20.4133  2.5221   3
  -1   4  -1 15.6551  3.2849   1
  -1   4  -1 21.1828  2.5675   4
   1  -4   1 13.9381  2.1155   3
   1  -4   1 14.7343  2.6899   4
   1  -4   1 15.8030  2.4171   1
  -2   4  -1 123.553   6.192   1
  -2   4  -1 110.978   5.214   3
  -2   4  -1 118.498   5.085   4
   2  -4   1 107.170   4.915   3
   2  -4   1 108.785   5.779   1
   2  -4   1 112.902   5.120   4
  -3   4  -1 459.308  16.112   1
  -3   4  -1 490.860  14.219   4
  -3   4  -1 476.502  15.320   3
   3  -4   1 489.165  14.341   4
   3  -4   1 483.876  16.337   1
   3  -4   1 499.248  15.283   3
  -4   4  -1 0.27047 3.42120   1
  -4   4  -1 3.29619 3.59849   3
  -4   4  -1 0.91713 1.38537   4
   4  -4   1 0.67560 3.26364   1
  -5   4  -1 179.619   9.276   3
  -5   4  -1 177.189   9.193   1
   5  -4   1 167.926   8.346   1
  -6   4  -1 4.20437 3.86611   1
  -6   4  -1 4.82543 5.05341   3
  -7   4  -1 2.34127 5.87042   3
  -7   4  -1 -0.5001  4.5534   1
  -7  -3   1 8.69664 6.09262   2
  -6  -3   1 16.4724  5.6923   2
  -5  -3   1 3.13241 1.84190   1
  -5  -3   1 4.71784 2.04187   1
  -5  -3   1 2.06716 2.45641   4
  -5  -3   1 3.57824 4.44655   2
   4   3  -1 15.8910  2.7703   4
  -4  -3   1 14.1154  2.1591   1
  -4  -3   1 11.3166  2.1468   1
  -4  -3   1 9.34099 4.05310   2
  -4  -3   1 9.91989 2.79126   4
   3   3  -1 1034.05   29.91   2
   3   3  -1 1041.07   28.65   4
  -3  -3   1 1008.44   29.95   2
  -3  -3   1 1035.98   29.15   1
  -3  -3   1 1009.50   28.60   4
  -3  -3   1 1024.66   29.19   1
   2   3  -1 322.142  11.141   2
   2   3  -1 330.032  10.544   1
   2   3  -1 314.424  10.374   4
  -2  -3   1 311.741  11.234   2
  -2  -3   1 314.250  10.406   4
  -2  -3   1 317.498  10.276   1
   1   3  -1 2257.93   61.27   1
   1   3  -1 2219.79   59.59   2
   1   3  -1 2286.35   58.75   4
  -1  -3   1 2257.58   61.18   1
  -1  -3   1 2198.37   58.70   4
   0   3  -1 1693.57   45.12   1
   0   3  -1 1638.04   42.88   4
   0  -3   1 1590.90   42.74   3
   0  -3   1 1610.42   42.87   4
   0  -3   1 1597.06   44.95   1
  -1   3  -1 5.11521 1.69263   1
  -1   3  -1 5.05399 1.77789   3
  -1   3  -1 2.05472 1.73558   4
   1  -3   1 2.52232 1.12819   3
   1  -3   1 5.06595 2.05531   4
   1  -3   1 4.33441 1.91167   1
  -2   3  -1 104.812   5.626   1
  -2   3  -1 106.319   4.608   3
  -2   3  -1 114.903   4.395   4
   2  -3   1 116.913   4.889   3
   2  -3   1 104.870   5.105   1
   2  -3   1 104.222   4.536   4
  -3   3  -1 328.177  11.691   1
  -3   3  -1 308.703  11.005   3
  -3   3  -1 331.521   9.557   4
   3  -3   1 336.240  11.626   1
  -4   3  -1 550.176  17.952   3
  -4   3  -1 551.900  14.875   4
  -4   3  -1 574.109  18.288   1
   4  -3   1 542.740  17.964   1
  -5   3  -1 321.271  13.810   3
  -5   3  -1 331.388  12.848   1
   5  -3   1 342.893  13.249   1
  -6   3  -1 140.235   8.323   3
  -6   3  -1 133.956   7.743   1
   6  -3   1 128.728   7.882   1
  -7   3  -1 67.8368  7.9440   3
  -7   3  -1 56.3019  5.8331   1
  -7  -2   1 -4.2480  5.4093   2
  -6  -2   1 11.8501  3.8876   2
  -6  -2   1 9.64633 2.49150   1
  -5  -2   1 271.606   9.119   1
  -5  -2   1 247.689   8.907   1
  -5  -2   1 254.932   8.895   4
  -5  -2   1 255.351  11.466   2
   4   2  -1 -1.0523  1.9121   4
  -4  -2   1 -1.2790  1.5201   1
  -4  -2   1 2.33133 1.50851   1
  -4  -2   1 -2.8223  2.4443   2
   3   2  -1 379.445  11.788   4
  -3  -2   1 414.496  11.981   4
  -3  -2   1 385.387  11.831   1
  -3  -2   1 390.732  11.859   1
  -3  -2   1 370.902  13.113   2
   2   2  -1 2077.19   55.40   2
   2   2  -1 2089.20   54.06   4
  -2  -2   1 2067.91   55.45   2
  -2  -2   1 2096.38   56.23   1
  -2  -2   1 2066.85   54.05   4
  -2  -2   1 2047.94   56.14   1
   1   2  -1 8783.92  220.83   4
   1   2  -1 8638.96  225.32   2
   1   2  -1 8877.17  235.75   1
  -1  -2   1 8528.08  224.18   2
  -1  -2   1 8593.27  241.53   1
  -1  -2   1 8876.60  220.87   4
  -1   2  -1 1876.63   50.81   1
  -1   2  -1 1728.28   47.26   4
  -1   2  -1 1981.32   48.08   3
   1  -2   1 1972.91   47.45   4
   1  -2   1 1832.49   47.99   3
   1  -2   1 1638.36   51.01   1
  -2   2  -1 1240.61   34.45   1
  -2   2  -1 1219.76   31.69   4
  -2   2  -1 1223.74   33.10   3
   2  -2   1 1216.45   34.40   1
   2  -2   1 1226.23   31.74   4
  -3   2  -1 530.009  16.538   3
  -3   2  -1 549.926  16.925   1
   3  -2   1 550.050  17.577   1
  -4   2  -1 384.924  13.712   3
  -4   2  -1 394.551  13.389   1
   4  -2   1 386.641  13.127   1
  -5   2  -1 457.044  16.505   3
  -5   2  -1 458.563  15.896   1
   5  -2   1 464.671  15.943   1
  -6   2  -1 224.645   9.792   1
  -6   2  -1 232.980  10.784   3
   6  -2   1 217.262   9.638   1
  -7   2  -1 4.34633 3.84853   1
  -7   2  -1 4.31018 3.56876   2
  -7   2  -1 -0.2097  5.0579   3
  -7  -1   1 -2.6902  4.6426   3
  -7  -1   1 2.41826 3.78916   2
  -6  -1   1 -3.3060  5.0362   2
  -6  -1   1 -0.1296  2.2624   1
  -5  -1   1 3.20747 3.09692   2
  -5  -1   1 1.38676 1.67417   1
  -5  -1   1 1.89134 1.53142   4
   4   1  -1 480.054  14.282   1
  -4  -1   1 467.547  13.505   4
  -4  -1   1 466.628  15.605   2
  -4  -1   1 467.340  14.246   1
   3   1  -1 156.020   5.394   1
  -3  -1   1 142.923   6.597   2
  -3  -1   1 161.794   5.449   1
  -3  -1   1 154.007   5.331   4
   2   1  -1 238.684   7.300   4
  -2  -1   1 238.585   7.231   1
  -2  -1   1 243.850   7.301   1
  -2  -1   1 239.365   7.240   4
  -2  -1   1 242.010  11.660   2
  -2   1  -1 30.3371  2.4889   1
   2  -1   1 24.0174  2.3068   1
  -3   1  -1 25.1790  2.6888   1
   3  -1   1 25.3367  2.6014   1
  -4   1  -1 181.584   7.341   1
   4  -1   1 190.249   7.611   1
  -5   1  -1 152.960   7.194   1
   5  -1   1 154.321   7.233   1
  -6   1  -1 0.28765 3.44922   2
  -6   1  -1 -0.5895  3.5694   1
  -6   1  -1 -2.4167  5.8966   3
   6  -1   1 1.41516 3.38211   1
  -7   1  -1 5.40716 4.72725   2
  -7   1  -1 0.30287 5.39590   3
  -7   1  -1 0.72771 3.34132   1
  -7   0   1 44.7536  6.6335   2
  -7   0   1 38.7245  6.7935   3
   6   0  -1 31.2322  3.3696   1
  -6   0   1 38.8780  5.1829   3
  -6   0   1 35.9916  5.8420   2
  -6   0   1 37.5714  3.5132   1
   5   0  -1 1.91059 2.09647   1
  -5   0   1 1.65098 4.16582   2
  -5   0   1 2.13151 2.06546   1
   4   0  -1 -1.3825  1.3901   1
  -4   0   1 -1.1398  0.9312   4
  -4   0   1 0.03949 1.59752   1
   3   0  -1 1475.95   41.91   1
  -3   0   1 1560.57   42.02   1
  -3   0   1 1566.96   39.60   4
   2   0  -1 144.133   4.863   1
  -2   0   1 156.064   4.943   1
  -2   0   1 159.120   4.651   4
  -2   0  -1 2259.36   58.93   1
   2   0   1 2082.55   59.37   1
  -3   0  -1 742.046  21.610   1
   3   0   1 744.076  21.574   1
  -4   0  -1 63.6238  3.8199   1
  -4   0  -1 68.0416  4.6294   2
   4   0   1 60.9110  3.6034   1
  -5   0  -1 1.01600 2.88181   2
  -5   0  -1 5.68821 3.02270   1
  -6   0  -1 565.428  19.426   2
  -6   0  -1 558.344  18.373   1
   6   0   1 547.795  18.212   1
  -7   0  -1 1.85715 5.65004   3
  -7   0  -1 5.66716 3.68696   2
  -7   1   1 0.55583 5.69151   3
  -7   1   1 -5.6272  5.0311   2
   6  -1  -1 23.8621  3.1000   1
  -6   1   1 14.3888  5.4730   3
  -6   1   1 19.9136  3.1793   1
   5  -1  -1 217.618   8.354   1
  -5   1   1 228.840   8.597   1
  -5   1   1 217.234  10.419   3
   4  -1  -1 286.124   9.638   1
  -4   1   1 284.053   9.632   1
  -4   1   1 274.060  10.500   3
   3  -1  -1 285.766   9.156   1
  -3   1   1 287.932   9.212   1
  -3   1   1 277.845   9.985   3
   2  -1  -1 2385.52   65.03   1
  -2   1   1 2410.13   63.49   3
  -2   1   1 2442.74   65.80   1
  -2  -1  -1 649.386  17.178   4
  -2  -1  -1 643.115  19.198   1
  -2  -1  -1 638.875  18.218   2
   2   1   1 628.235  18.392   1
   2   1   1 633.044  17.139   4
  -3  -1  -1 32.6999  1.9708   4
  -3  -1  -1 26.2882  2.4673   1
  -3  -1  -1 26.7704  2.6635   2
   3   1   1 28.4078  1.9331   4
   3   1   1 29.0335  2.4602   1
  -4  -1  -1 10.5293  2.5161   2
  -4  -1  -1 11.1760  1.5699   4
  -4  -1  -1 10.5078  2.3299   1
   4   1   1 9.86601 2.21162   1
   4   1   1 7.92926 1.37971   4
  -5  -1  -1 373.914  14.299   2
  -5  -1  -1 379.982  13.049   1
   5   1   1 376.849  13.002   1
  -6  -1  -1 103.693   5.913   1
  -6  -1  -1 91.9844  6.6140   2
  -7  -1  -1 91.2145  8.0752   2
  -7   2   1 9.80231 3.22846   1
  -7   2   1 12.2508  4.3863   3
   6  -2  -1 9.53721 3.32801   1
  -6   2   1 12.8585  3.2251   1
  -6   2   1 16.1416  5.3000   3
   5  -2  -1 1376.81   39.88   1
  -5   2   1 1422.41   40.03   1
  -5   2   1 1356.40   40.15   3
   4  -2  -1 189.894   7.540   1
  -4   2   1 181.888   5.629   4
  -4   2   1 191.218   8.554   3
  -4   2   1 189.988   7.637   1
   3  -2  -1 3229.28   87.77   1
  -3   2   1 3311.09   87.85   1
  -3   2   1 3177.55   84.35   4
  -3   2   1 3218.74   85.49   3
   2  -2  -1 15.8608  2.0742   1
   2  -2  -1 16.0900  2.3932   3
  -2   2   1 13.1215  1.5378   4
  -2   2   1 12.1522  2.1924   1
  -2   2   1 19.9928  2.6703   3
   1  -2  -1 237.493   8.016   1
   1  -2  -1 253.402   7.622   4
   1  -2  -1 230.203   7.595   3
  -1   2   1 269.697   8.304   1
  -1   2   1 255.601   7.797   3
  -1   2   1 234.989   7.433   4
   0  -2  -1 2295.13   59.76   4
   0   2   1 2408.34   62.94   1
   0   2   1 2240.78   61.22   3
  -1  -2  -1 127.181   4.883   1
  -1  -2  -1 121.027   4.810   4
   1   2   1 121.891   4.771   4
   1   2   1 125.065   4.841   1
   1   2   1 123.178  10.088   2
  -2  -2  -1 13.0832  1.9223   4
  -2  -2  -1 13.0409  2.5517   2
  -2  -2  -1 10.9243  1.8620   1
  -2  -2  -1 16.3667  2.1923   1
   2   2   1 16.2692  2.1070   4
   2   2   1 13.5645  2.4059   2
  -3  -2  -1 163.044   5.992   4
  -3  -2  -1 161.392   6.447   1
  -3  -2  -1 161.550   6.329   1
  -3  -2  -1 176.154   7.307   2
   3   2   1 158.788   5.967   4
  -4  -2  -1 25.7105  2.9397   1
  -4  -2  -1 23.2202  2.5107   4
  -4  -2  -1 20.6189  3.2005   2
  -4  -2  -1 21.7952  2.6292   1
   4   2   1 26.0455  2.4103   4
  -5  -2  -1 107.964   6.844   2
  -5  -2  -1 110.262   4.824   4
  -5  -2  -1 113.740   5.813   1
  -5  -2  -1 109.879   5.515   1
  -6  -2  -1 46.3064  5.9898   2
  -6  -2  -1 51.0290  4.2765   1
  -7  -2  -1 16.9818  5.5321   2
  -7   3   1 -13.460   6.009   3
  -7   3   1 -0.6455  3.1835   1
  -6   3   1 20.6422  5.0482   1
   5  -3  -1 819.217  26.223   1
  -5   3   1 861.419  27.215   3
  -5   3   1 858.226  26.412   1
   4  -3  -1 6.95694 3.02747   1
  -4   3   1 4.76133 2.30593   1
  -4   3   1 7.71726 3.79440   3
   3  -3  -1 1030.51   28.88   3
   3  -3  -1 1046.51   29.71   1
  -3   3   1 998.111  28.905   3
  -3   3   1 1002.69   27.14   4
  -3   3   1 990.223  29.596   1
   2  -3  -1 530.427  15.077   3
   2  -3  -1 481.128  15.502   1
  -2   3   1 477.029  14.900   3
  -2   3   1 481.506  15.597   1
  -2   3   1 493.952  14.216   4
   1  -3  -1 864.437  23.202   4
   1  -3  -1 861.215  23.243   3
   1  -3  -1 824.179  24.400   1
  -1   3   1 841.792  23.016   4
  -1   3   1 849.586  23.349   3
  -1   3   1 802.121  24.378   1
   0  -3  -1 1451.41   38.50   3
   0  -3  -1 1447.65   38.35   4
   0  -3  -1 1479.05   40.27   1
   0   3   1 1456.31   38.27   4
   0   3   1 1365.54   40.19   1
  -1  -3  -1 7754.10  209.68   1
  -1  -3  -1 7503.25  193.67   4
   1   3   1 7316.48  196.49   2
   1   3   1 7693.09  194.16   4
   1   3   1 7787.91  203.64   1
  -2  -3  -1 454.206  14.015   1
  -2  -3  -1 434.175  13.629   4
   2   3   1 454.660  13.658   4
   2   3   1 442.032  14.208   1
   2   3   1 432.417  14.085   2
  -3  -3  -1 115.275   6.415   2
  -3  -3  -1 121.972   5.606   1
  -3  -3  -1 121.488   5.688   1
  -3  -3  -1 134.302   5.821   4
   3   3   1 128.080   6.138   2
   3   3   1 117.303   5.567   4
  -4  -3  -1 15.4028  3.1635   1
  -4  -3  -1 14.4318  2.8322   1
   4   3   1 11.9235 14.9366   4
  -5  -3  -1 1.88711 2.46340   1
  -5  -3  -1 -1.1740  2.3379   4
  -5  -3  -1 1.72162 2.21296   1
  -5  -3  -1 -0.5567  3.0281   2
   5   3   1 -4.4698  2.7177   4
  -6  -3  -1 8.06846 5.02483   2
  -7  -3  -1 62.6077  6.6748   2
  -7   4   1 5.73077 5.95760   3
   6  -4  -1 184.102   9.128   1
  -6   4   1 209.739  11.049   3
  -6   4   1 183.357   9.350   1
   5  -4  -1 220.021   9.955   1
  -5   4   1 220.513  10.922   3
  -5   4   1 242.341  10.449   1
  -5   4   1 217.450   7.356   4
   4  -4  -1 -1.6832  3.2375   1
  -4   4   1 2.48269 2.55984   1
  -4   4   1 4.66763 3.76862   3
   3  -4  -1 1657.81   44.65   3
   3  -4  -1 1665.17   46.46   1
  -3   4   1 1570.78   43.03   4
  -3   4   1 1571.43   44.53   3
  -3   4   1 1645.90   46.50   1
   2  -4  -1 796.288  22.451   4
   2  -4  -1 770.401  23.883   1
   2  -4  -1 794.823  22.704   3
  -2   4   1 791.503  22.252   4
  -2   4   1 784.120  22.726   3
  -2   4   1 802.098  24.117   1
   1  -4  -1 8.70555 2.48295   3
   1  -4  -1 10.9916  3.0578   4
   1  -4  -1 11.5515  2.2892   1
  -1   4   1 11.3736  2.2278   4
  -1   4   1 15.5383  2.6296   1
  -1   4   1 13.9555  3.0979   3
   0  -4  -1 83.9391  5.0564   1
   0  -4  -1 86.4642  4.1665   3
   0  -4  -1 79.8283  4.7002   4
   0   4   1 81.5746  6.8919   4
   0   4   1 70.7022  4.7052   1
  -1  -4  -1 816.266  24.484   1
  -1  -4  -1 823.708  23.717   4
  -1  -4  -1 802.992  23.503   3
   1   4   1 840.256  23.709   4
   1   4   1 845.710  24.742   1
   1   4   1 810.168  23.849   2
  -2  -4  -1 844.574  24.702   1
  -2  -4  -1 782.208  23.783   4
   2   4   1 833.148  24.512   2
   2   4   1 837.584  24.869   1
   2   4   1 815.038  23.804   4
  -3  -4  -1 838.412  24.661   4
  -3  -4  -1 819.951  25.221   1
  -3  -4  -1 849.861  25.562   1
   3   4   1 846.077  25.709   2
   3   4   1 830.755  24.409   4
  -4  -4  -1 183.213   8.005   1
  -4  -4  -1 199.819   8.447   4
  -4  -4  -1 191.223   9.686   2
  -4  -4  -1 184.797   8.208   1
   4   4   1 191.988   8.371   4
  -5  -4  -1 25.1372  5.5059   2
  -5  -4  -1 16.2853  3.4731   4
  -5  -4  -1 18.5234  3.4164   1
  -7   5   1 9.59809 6.16322   3
  -6   5   1 38.6195  4.6155   1
  -6   5   1 44.6433  6.6065   3
  -5   5   1 5.54303 2.07304   4
  -5   5   1 8.83891 3.53404   1
  -5   5   1 9.19342 3.53150   3
   4  -5  -1 243.908  10.816   1
   4  -5  -1 260.300  10.369   3
  -4   5   1 245.747   8.859   4
  -4   5   1 237.420  10.419   3
  -4   5   1 253.863  11.005   1
   3  -5  -1 307.355  11.343   3
   3  -5  -1 324.735  12.425   1
  -3   5   1 330.684  11.006   4
  -3   5   1 320.947  11.508   3
  -3   5   1 316.188  12.471   1
   2  -5  -1 390.461  12.981   4
   2  -5  -1 365.903  13.833   1
   2  -5  -1 384.123  12.679   3
  -2   5   1 403.831  12.913   4
  -2   5   1 371.536  13.833   1
  -2   5   1 388.108  12.990   3
   1  -5  -1 179.384   8.065   4
   1  -5  -1 201.173   7.462   3
   1  -5  -1 188.629  10.114   1
  -1   5   1 187.130   8.644   1
  -1   5   1 184.628   7.813   4
  -1   5   1 187.697   7.724   3
   0  -5  -1 4.86563 3.65131   4
   0  -5  -1 2.54853 2.83499   1
   0   5   1 0.85540 2.14865   4
   0   5   1 -5.5137  3.6934   1
  -1  -5  -1 -7.4312  3.5215   4
  -1  -5  -1 -1.7112  2.2964   1
  -1  -5  -1 -3.6909  2.5747   3
   1   5   1 3.69523 3.09760   4
   1   5   1 -3.1265  3.3677   1
   1   5   1 2.45568 2.13354   2
  -2  -5  -1 -1.4719  2.9634   1
  -2  -5  -1 4.77889 3.94498   4
   2   5   1 5.59735 3.76835   2
   2   5   1 3.93217 3.54642   1
   2   5   1 -5.4217  4.0609   4
  -3  -5  -1 192.484   8.447   1
  -3  -5  -1 189.611   8.435   1
  -3  -5  -1 197.052   8.952   4
   3   5   1 198.272   8.810   4
  -4  -5  -1 179.641   8.380   1
  -4  -5  -1 168.843   8.077   1
  -4  -5  -1 184.279   8.436   4
   4   5   1 174.522   8.684   4
  -5  -5  -1 75.3452  6.0474   4
  -5  -5  -1 70.7548  5.3554   1
  -7   6   1 9.64990 5.42833   1
  -7   6   1 0.36040 6.05154   3
  -6   6   1 100.575   8.128   3
  -6   6   1 107.179   7.414   1
  -5   6   1 62.1683  4.1458   4
  -5   6   1 60.1370  6.2023   1
  -5   6   1 70.4395  5.8072   3
   4  -6  -1 23.4645  4.7657   3
  -4   6   1 25.0345  3.8234   4
  -4   6   1 31.5853  5.5073   1
   3  -6  -1 20.8975  3.6778   3
   3  -6  -1 10.5986  4.4084   1
  -3   6   1 32.5848  4.5952   3
  -3   6   1 22.6147  3.7709   4
   2  -6  -1 236.633   9.884   4
   2  -6  -1 216.042  10.073   1
   2  -6  -1 230.392   9.002   3
  -2   6   1 214.480   9.915   1
  -2   6   1 226.922   9.271   4
  -2   6   1 229.316   9.369   3
   1  -6  -1 602.792  19.479   4
   1  -6  -1 637.304  18.988   3
   1  -6  -1 645.209  20.873   1
  -1   6   1 610.362  20.808   1
  -1   6   1 609.414  19.164   3
  -1   6   1 611.776  19.494   4
   0  -6  -1 88.9827  5.9207   1
   0  -6  -1 76.9609  6.1894   4
   0  -6  -1 86.6743  4.9518   3
   0   6   1 80.1246  5.6966   4
   0   6   1 87.1284  6.1295   1
  -1  -6  -1 4.26827 3.30313   1
  -1  -6  -1 -4.5124  4.3315   4
  -1  -6  -1 6.16670 3.10926   3
   1   6   1 2.31293 3.73055   2
   1   6   1 8.35497 4.06192   1
   1   6   1 -3.9015  2.9760   4
  -2  -6  -1 742.737  23.073   4
  -2  -6  -1 687.512  22.257   3
  -2  -6  -1 701.740  23.141   1
   2   6   1 711.973  22.860   4
   2   6   1 752.741  23.636   1
  -3  -6  -1 30.2100  5.2999   4
  -3  -6  -1 33.2120  4.5997   1
  -3  -6  -1 27.9496  4.1280   1
  -4  -6  -1 2.91566 3.98918   1
  -4  -6  -1 7.37205 4.14896   4
  -5  -6  -1 26.1596  4.7529   4
  -6   7   1 8.84615 5.57784   3
  -6   7   1 -7.0022  4.1878   1
  -5   7   1 170.370   9.734   3
  -5   7   1 177.182  10.461   1
  -4   7   1 135.677   7.446   3
  -4   7   1 132.360   8.196   1
  -4   7   1 126.492   6.952   4
   3  -7  -1 313.272  11.903   3
  -3   7   1 288.234  11.786   4
  -3   7   1 296.433  13.417   1
  -3   7   1 327.318  12.300   3
   2  -7  -1 24.3182  5.9254   4
  -2   7   1 33.9407  5.3732   3
  -2   7   1 34.0420  8.7368   1
   1  -7  -1 15.1249  2.6620   3
   0  -7  -1 12.0796  2.5201   3
   0  -7  -1 9.07726 4.85944   4
   0   7   1 9.03275 4.39964   1
  -1  -7  -1 16.6302  5.2741   4
  -1  -7  -1 14.7821  2.7830   3
   1   7   1 18.4107  5.0148   1
  -2  -7  -1 45.9288  5.4051   4
   2   7   1 49.5966  5.9806   1
  -3  -7  -1 104.619   7.864   4
  -3  -7  -1 93.8179  6.5958   1
  -4  -7  -1 103.100   7.433   4
  -4  -7  -1 105.022   7.330   1
  -6   8   1 9.58705 5.88311   1
  -6   8   1 1.15703 4.44608   3
  -5   8   1 -1.2568  4.0354   1
  -4   8   1 18.1495  4.5868   1
  -4   8   1 28.4982  5.1761   3
  -3   8   1 43.6622  6.5796   1
  -3   8   1 39.6466  5.3789   3
   2  -8  -1 88.5426  7.8235   4
   2  -8  -1 98.6516  6.2751   3
  -2   8   1 112.812   8.471   1
  -2   8   1 95.4526  6.7575   3
   1  -8  -1 36.9544  6.4337   4
   1  -8  -1 25.9132  3.6545   3
  -1   8   1 26.0140  5.7086   1
   0  -8  -1 18.7085  5.9179   4
   0   8   1 23.6837 17.5045   1
  -1  -8  -1 188.019   9.859   4
   1   8   1 188.865   9.974   1
  -2  -8  -1 166.947   9.968   4
   2   8   1 149.691   9.625   1
  -3  -8  -1 15.6847  5.9468   4
   3   8   1 5.48950 4.76518   1
  -4  -8  -1 -6.6875  5.1710   4
  -5   9   1 43.2318  6.1904   1
  -5   9   1 41.9137  5.4823   3
  -4   9   1 12.0988  5.7795   1
  -3   9   1 89.2532  8.2633   1
  -3   9   1 93.0517  7.2258   3
  -2   9   1 25.8454  4.4341   3
  -2   9   1 19.1691  5.9063   1
  -1   9   1 21.5928  4.8879   1
   0   9   1 5.25147 5.31553   1
   1   9   1 -1.0776  4.2858   1
   2   9   1 15.4717  6.0883   1
  -3  -9  -1 9.15044 5.42289   1
  -4  10   1 4.95099 6.00875   1
  -4  10   1 1.39755 4.21060   3
  -3  10   1 10.9007  4.5381   1
  -3  10   1 20.0373  5.0443   3
  -2  10   1 45.5875  6.4847   1
  -1  10   1 51.9926  8.0664   1
   0  10   1 10.9933  6.5957   1
   1  10   1 16.9431  5.2265   1
   0  10  -2 68.7778  7.4175   1
  -2  10  -2 12.6517  6.5781   1
   2 -10   2 5.68586 4.50656   4
  -3  10  -2 0.92484 3.98298   3
  -3  10  -2 7.36515 6.23888   1
  -4  10  -2 0.30347 4.45215   3
  -4  10  -2 1.28490 4.29253   1
   3   9  -2 64.1668  7.2586   1
   2   9  -2 72.2679  6.4595   1
  -2  -9   2 84.4636  7.1331   4
   0   9  -2 -0.8398  5.0326   1
  -1   9  -2 3.53708 6.08322   1
  -2   9  -2 25.8855  6.1707   1
  -3   9  -2 6.08594 4.77704   1
  -3   9  -2 10.3551  4.3080   3
  -4   9  -2 17.9297  4.6464   3
  -4   9  -2 14.4455  5.5538   1
  -5   9  -2 -9.9486  4.8663   3
  -5   9  -2 -9.1238  4.8823   1
  -4  -8   2 138.494   9.990   4
   3   8  -2 17.2664  3.9697   1
  -3  -8   2 11.7556  4.2846   4
   2   8  -2 19.3403  4.2471   1
  -2  -8   2 26.6693  6.0386   4
   1   8  -2 119.337   8.003   1
  -1  -8   2 105.713   5.721   3
  -1  -8   2 113.176   7.487   4
   0  -8   2 517.129  18.570   4
   0  -8   2 488.873  16.179   3
  -1   8  -2 93.0930  7.9600   1
   1  -8   2 92.9291  5.2579   3
   1  -8   2 103.253   7.941   4
  -2   8  -2 97.0357  7.3840   1
  -2   8  -2 107.196   6.377   3
   2  -8   2 107.686   8.328   4
   2  -8   2 107.301   5.813   3
  -3   8  -2 4.12077 3.99641   3
  -3   8  -2 -0.2133  3.9607   1
   3  -8   2 1.67229 2.38160   3
   3  -8   2 3.96156 4.78270   4
  -4   8  -2 -8.9777  5.5182   1
  -4   8  -2 -8.9555  4.3830   3
  -5   8  -2 -3.5157  5.0951   1
  -5   8  -2 -5.4165  4.6269   3
  -6   8  -2 2.40490 5.89032   1
  -6   8  -2 4.14804 5.20222   3
  -5  -7   2 11.5524  5.6715   4
  -4  -7   2 83.4889  7.7933   4
  -4  -7   2 94.6972  6.4736   1
   3   7  -2 -2.5471  3.6589   1
  -3  -7   2 -0.7369  4.8004   1
  -3  -7   2 9.10556 4.84951   4
   2   7  -2 50.3160  5.5060   1
  -2  -7   2 43.9952  4.2280   3
  -2  -7   2 42.9941  5.8422   4
  -2  -7   2 41.4514  4.2917   1
   1   7  -2 8.88503 4.20207   1
  -1  -7   2 9.64292 2.75623   3
  -1  -7   2 2.45961 3.35720   1
  -1  -7   2 21.4360  5.1593   4
   0   7  -2 165.484   9.155   1
   0  -7   2 181.885   9.058   1
   0  -7   2 189.807   9.523   4
   0  -7   2 173.807   7.182   3
  -1   7  -2 19.4681  4.7999   1
   1  -7   2 19.1135  2.7987   3
   1  -7   2 11.8624  3.7829   4
  -2   7  -2 1158.89   36.45   1
  -2   7  -2 1143.90   33.79   4
  -2   7  -2 1198.49   33.30   3
   2  -7   2 1172.29   34.08   4
   2  -7   2 1157.80   32.92   3
  -3   7  -2 49.8042  4.4495   4
  -3   7  -2 50.6934  4.2598   3
  -3   7  -2 48.6700  6.1382   1
   3  -7   2 54.0788  4.1188   3
   3  -7   2 55.9492  5.5272   4
  -4   7  -2 2.79277 4.49846   1
  -4   7  -2 -5.5240  2.9983   4
  -4   7  -2 -5.4508  3.7854   3
  -5   7  -2 6.07533 5.22509   1
  -6   7  -2 35.4990  6.7504   1
  -6   7  -2 29.2846  5.8788   3
  -5  -6   2 24.3911  4.8955   4
  -4  -6   2 17.8204  3.5695   1
  -4  -6   2 19.9393  4.8039   4
   3   6  -2 3.67981 3.68552   1
  -3  -6   2 1.47517 4.72599   4
   2   6  -2 216.561   9.661   4
   2   6  -2 245.765   9.912   1
  -2  -6   2 232.414   9.411   1
  -2  -6   2 213.407  10.141   4
   1   6  -2 21.4180  3.5941   1
   1   6  -2 20.4350  4.0510   4
   1   6  -2 25.9180  4.0824   2
  -1  -6   2 25.4334  2.5919   3
  -1  -6   2 29.0662  4.7084   4
  -1  -6   2 28.4506  3.5318   1
   0   6  -2 142.395   7.657   1
   0   6  -2 140.534   6.949   4
   0  -6   2 136.436   5.694   3
   0  -6   2 135.075   7.312   4
   0  -6   2 141.710   7.178   1
  -1   6  -2 144.934   6.208   3
  -1   6  -2 136.640   6.779   4
  -1   6  -2 136.159   7.479   1
   1  -6   2 137.704   7.119   1
   1  -6   2 153.304   5.990   3
   1  -6   2 145.628   7.706   4
  -2   6  -2 557.302  16.807   3
  -2   6  -2 555.520  17.230   4
  -2   6  -2 516.916  18.602   1
   2  -6   2 539.780  16.450   3
   2  -6   2 552.135  18.833   1
   2  -6   2 547.182  17.331   4
  -3   6  -2 419.865  15.885   1
  -3   6  -2 401.380  13.692   3
  -3   6  -2 414.150  13.739   4
   3  -6   2 376.991  15.094   1
   3  -6   2 432.392  14.040   4
   3  -6   2 424.674  13.833   3
  -4   6  -2 44.3434  5.8464   1
  -4   6  -2 44.4580  3.6773   4
  -4   6  -2 39.8765  4.2887   3
  -5   6  -2 41.5703  3.3055   4
  -5   6  -2 53.6831  5.6002   3
  -5   6  -2 54.2846  5.4446   1
  -6   6  -2 -5.8975  5.1062   1
  -6   6  -2 -3.2795  4.9628   3
  -7   6  -2 -8.6038  4.2760   1
  -7   6  -2 13.4638  4.6824   3
  -6  -5   2 86.2479  8.7398   2
  -5  -5   2 141.081   7.849   4
  -5  -5   2 133.002   9.468   2
   4   5  -2 290.267  11.995   4
  -4  -5   2 300.412  10.859   1
  -4  -5   2 317.401  11.972   4
  -4  -5   2 285.225  10.584   1
   3   5  -2 99.1112  7.4917   4
   3   5  -2 117.874   6.432   1
  -3  -5   2 108.507   8.564   4
  -3  -5   2 108.377   5.748   1
   2   5  -2 227.258   9.971   2
   2   5  -2 253.527   9.655   1
   2   5  -2 248.388   9.693   4
  -2  -5   2 252.407  10.282   4
  -2  -5   2 255.391   9.381   1
   1   5  -2 16.4389  3.3568   2
   1   5  -2 14.7476  3.1474   1
   1   5  -2 10.5557  3.4953   4
  -1  -5   2 9.64770 2.09458   1
  -1  -5   2 7.82121 2.20161   3
  -1  -5   2 8.51173 2.82860   4
   0   5  -2 86.2886  5.2607   4
   0   5  -2 93.8993  5.5354   1
   0  -5   2 89.1266  4.1284   3
   0  -5   2 98.7788  5.3006   1
   0  -5   2 93.6978  5.7924   4
  -1   5  -2 55.0284  3.5247   3
  -1   5  -2 61.7167  4.3331   4
  -1   5  -2 55.2763  4.8106   1
   1  -5   2 53.6434 11.2782   1
   1  -5   2 57.2875  3.2502   3
   1  -5   2 51.8571  4.8276   4
  -2   5  -2 273.358   9.549   4
  -2   5  -2 259.071   9.151   3
  -2   5  -2 247.499  10.744   1
   2  -5   2 257.128  10.591   1
   2  -5   2 266.562   9.755   4
   2  -5   2 278.010   9.114   3
  -3   5  -2 7.17526 2.53005   4
  -3   5  -2  2.0810 10.3281   1
   3  -5   2 -1.5048  3.4168   4
   3  -5   2 1.17275 3.93153   1
   3  -5   2 2.30473 2.70263   3
  -4   5  -2 16.8000  4.2953   1
  -4   5  -2 12.4904  2.8992   3
  -4   5  -2 19.3544  2.3647   4
   4  -5   2 14.0273  4.0938   1
  -5   5  -2 -6.2381  3.9519   3
  -5   5  -2 -1.6188  4.1944   1
  -6   5  -2 -2.7663  4.3680   1
  -6   5  -2 0.00000 3.22490   3
  -7   5  -2 32.9773  6.0972   1
  -7   5  -2 28.5971  6.6869   3
  -6  -4   2 112.901   9.104   2
   5   4  -2 -9.2726  3.7145   4
  -5  -4   2 1.75365 1.86648   1
  -5  -4   2 -0.3985  3.4162   4
  -5  -4   2 2.11511 4.56112   2
   4   4  -2 580.830  18.819   4
  -4  -4   2 586.563  18.226   1
  -4  -4   2 588.272  18.253   1
  -4  -4   2 608.849  18.853   4
  -4  -4   2 643.831  20.949   2
   3   4  -2 97.3185  5.5391   4
   3   4  -2 113.226   6.689   2
  -3  -4   2 116.069   6.984   2
  -3  -4   2 103.939   4.936   1
  -3  -4   2 104.550   5.024   1
  -3  -4   2 104.253   5.706   4
   2   4  -2 855.865  24.498   1
   2   4  -2 839.434  24.232   4
   2   4  -2 814.474  24.609   2
  -2  -4   2 811.850  24.258   1
  -2  -4   2 843.983  24.315   4
   1   4  -2 30.8692  3.6192   1
   1   4  -2 31.7718  3.2353   4
   1   4  -2 30.6692  3.1977   2
  -1  -4   2 33.9089  2.9958   1
  -1  -4   2 33.4255  4.0574   4
   0   4  -2 2630.71   70.94   1
   0   4  -2 2618.71   67.60   4
   0  -4   2 2538.95   72.04   1
   0  -4   2 2535.18   67.34   3
   0  -4   2 2568.51   67.64   4
  -1   4  -2 1118.99   34.53   1
  -1   4  -2 1190.99   32.31   3
  -1   4  -2 1229.29   32.74   4
   1  -4   2 1228.14   32.28   3
   1  -4   2 1203.68   32.82   4
   1  -4   2 1244.63   34.74   1
  -2   4  -2 26.0209  2.9116   1
  -2   4  -2 34.3715  2.8210   4
  -2   4  -2 31.8307  2.9040   3
   2  -4   2 37.5947  2.7104   3
   2  -4   2 34.3341  3.0920   4
   2  -4   2 31.8324  2.9746   1
  -3   4  -2 383.115  13.713   1
  -3   4  -2 381.168  12.722   3
  -3   4  -2 391.571  11.795   4
   3  -4   2 394.903  11.938   4
   3  -4   2 400.636  14.089   1
  -4   4  -2 55.3588  5.4208   1
  -4   4  -2 57.6086  4.3569   3
  -4   4  -2 65.3245  3.0413   4
   4  -4   2 66.1648  5.3179   1
  -5   4  -2 124.683   7.981   3
  -5   4  -2 137.072   8.229   1
   5  -4   2 133.425   7.986   1
  -6   4  -2 96.1305  7.6654   3
  -6   4  -2 95.5017  6.8366   1
  -7   4  -2 9.39484 6.10781   3
  -7   4  -2 -2.0416  5.1552   1
  -7  -3   2 26.5342  6.5741   2
  -6  -3   2 171.627   7.487   4
  -6  -3   2 176.252   9.870   2
  -5  -3   2 46.0496  2.9833   1
  -5  -3   2 49.8944  5.9869   2
  -5  -3   2 51.8339  4.0518   4
  -5  -3   2 55.2042  3.3104   1
   4   3  -2 19.7696  3.1405   4
  -4  -3   2 19.9634  2.0206   1
  -4  -3   2 15.9897  4.2073   2
  -4  -3   2 19.9199  3.1623   4
  -4  -3   2 21.2047  2.1695   1
   3   3  -2 833.182  33.349   4
   3   3  -2 833.239  24.926   2
  -3  -3   2 851.728  23.814   1
  -3  -3   2 831.436  25.215   2
  -3  -3   2 837.274  23.836   1
  -3  -3   2 811.718  23.798   4
   2   3  -2 2442.34   63.63   4
   2   3  -2 2415.45   64.86   2
   2   3  -2 2418.08   65.87   1
  -2  -3   2 2431.46   63.62   4
  -2  -3   2 2416.34   67.61   1
  -2  -3   2 2427.07   65.06   2
   1   3  -2 5.06273 2.07050   4
   1   3  -2 5.54385 4.91676   2
  -1  -3   2 4.52077 2.07266   4
   0   3  -2 135.998   5.381   4
   0   3  -2 134.944   5.328   1
   0  -3   2 130.339   5.192   4
   0  -3   2 135.939   4.430   3
   0  -3   2 128.851   5.311   1
  -1   3  -2 3.98734 1.72006   4
  -1   3  -2 3.50914 2.12775   1
  -1   3  -2 3.38017 1.34754   3
   1  -3   2 6.39487 1.21850   3
   1  -3   2 5.71232 1.90866   1
   1  -3   2 7.95512 2.02948   4
  -2   3  -2 20.0125  2.3772   3
  -2   3  -2 22.1537  3.2745   1
   2  -3   2 18.2626  2.6362   1
   2  -3   2 22.5757  2.1969   4
  -3   3  -2 19.3780  3.4397   3
  -3   3  -2 21.0609  3.8883   1
  -3   3  -2 25.1271  1.8118   4
   3  -3   2 16.1975  1.9057   4
   3  -3   2 21.9682  3.6457   1
  -4   3  -2 119.655  13.084   3
  -4   3  -2 119.573   7.275   1
   4  -3   2 126.493   6.773   1
  -5   3  -2 206.971  10.630   3
  -5   3  -2 207.205   9.539   1
   5  -3   2 203.295   9.834   1
  -6   3  -2 117.632   7.430   1
  -6   3  -2 103.370   7.120   3
   6  -3   2 90.1275  7.2776   1
  -7   3  -2 116.571   7.848   1
  -7   3  -2 116.620   8.880   3
  -7  -2   2 2.52668 6.37246   3
  -7  -2   2 5.06440 5.90533   2
  -6  -2   2 11.8612  2.3885   4
  -6  -2   2 0.45970 5.12516   2
  -5  -2   2 164.299   6.169   1
  -5  -2   2 176.887   6.930   4
  -5  -2   2 180.566   9.455   2
  -5  -2   2 173.832   6.338   1
  -4  -2   2 221.456   7.949   4
  -4  -2   2 218.113   9.575   2
  -4  -2   2 218.908   7.337   1
  -4  -2   2 224.076   7.285   1
   3   2  -2 418.000  12.945   4
  -3  -2   2 446.808  14.431   2
  -3  -2   2 424.355  13.050   4
  -3  -2   2 437.645  12.643   1
  -3  -2   2 423.769  12.563   1
   2   2  -2 426.539  12.018   1
   2   2  -2 422.051  13.048   2
   2   2  -2 402.520  12.236   4
  -2  -2   2 394.150  12.179   4
  -2  -2   2 415.071  13.174   2
  -2  -2   2 403.534  11.901   1
   1   2  -2 1053.01   27.83   4
   1   2  -2 1053.84   28.60   1
   1   2  -2 1038.90   28.32   2
  -1  -2   2 1044.62   28.37   2
  -1  -2   2 1027.52   28.53   1
  -1  -2   2 1022.28   27.79   4
   0   2  -2 2325.13   59.91   4
   0  -2   2 2327.75   59.97   3
  -1   2  -2 479.641  13.345   4
  -1   2  -2 496.971  14.614   1
  -1   2  -2 484.996  13.346   3
   1  -2   2 469.199  13.365   4
   1  -2   2 497.635  14.586   1
   1  -2   2 487.740  13.321   3
  -2   2  -2 469.938  14.375   3
  -2   2  -2 498.864  15.378   1
  -2   2  -2 504.057  13.409   4
   2  -2   2 516.799  15.388   1
   2  -2   2 502.671  13.459   4
  -3   2  -2 541.535  17.078   1
  -3   2  -2 530.097  16.476   3
   3  -2   2 555.336  17.060   1
  -4   2  -2 496.295  16.349   3
  -4   2  -2 500.898  16.517   1
   4  -2   2 498.888  16.393   1
  -5   2  -2 101.398   6.792   1
  -5   2  -2 77.1632  7.5179   3
   5  -2   2 89.8282  5.7718   1
  -6   2  -2 99.5769  6.4794   1
  -6   2  -2 96.2727  7.1043   3
   6  -2   2 91.2587  5.9728   1
  -7   2  -2 2.71539 3.90177   1
  -7   2  -2 2.94935 4.82950   2
  -7   2  -2 2.38580 5.80371   3
  -7  -1   2 7.55953 4.58095   3
  -7  -1   2 7.57705 5.59620   2
  -6  -1   2 391.644  15.938   3
  -6  -1   2 390.892  11.883   4
  -6  -1   2 392.089  12.653   1
  -6  -1   2 424.678  16.244   2
  -5  -1   2 13.2109  1.7670   1
  -5  -1   2 15.8172  2.0289   1
  -5  -1   2 14.2676  1.9615   4
  -5  -1   2 23.3045  4.7592   2
  -4  -1   2 27.5796  2.3704   4
  -4  -1   2 27.1054  1.9073   1
  -4  -1   2 26.1626  3.6118   2
  -4  -1   2 28.9765  2.0338   1
  -3  -1   2 251.031   9.292   2
  -3  -1   2 253.600   7.912   4
  -3  -1   2 244.545   7.539   1
  -3  -1   2 247.259   7.512   1
   2   1  -2 3105.94   80.37   4
  -2  -1   2 3099.77   77.94   4
  -2  -1   2 2969.81   79.72   2
  -2  -1   2 2910.36   86.16   1
  -2  -1   2 3121.22   84.01   1
  -2   1  -2 247.948   8.553   1
   2  -1   2 255.831   8.596   1
   3  -1   2 -2.6972  3.2534   1
  -4   1  -2 207.470   8.343   1
   4  -1   2 198.788   8.109   1
  -5   1  -2 226.025   9.333   1
   5  -1   2 239.558   9.771   1
  -6   1  -2 418.958  15.812   2
  -6   1  -2 447.424  15.504   1
  -6   1  -2 411.105  16.968   3
   6  -1   2 415.242  15.157   1
  -7   1  -2 7.96158 4.23870   3
  -7   1  -2 20.6704  5.2813   2
  -7   1  -2 13.6839  3.8366   1
  -7   0   2 12.8247  5.9704   3
  -7   0   2 4.31092 4.04218   2
  -6   0   2 -2.7151  5.7189   3
  -6   0   2 -1.1239  2.1225   1
  -6   0   2 3.46385 4.62529   2
   5   0  -2 131.416   5.393   1
  -5   0   2 121.510   7.503   2
  -5   0   2 133.774   4.678   4
  -5   0   2 139.917   7.389   3
  -5   0   2 129.492   5.367   1
   4   0  -2 110.678   4.467   1
  -4   0   2 116.247   4.602   1
  -4   0   2 106.955   6.055   3
  -4   0   2 118.205   4.268   4
   3   0  -2 12.3889  3.8728   1
  -3   0   2 12.9238  1.4952   1
  -3   0   2 13.4711  1.5672   4
   2   0  -2 537.439  15.604   1
  -2   0   2 599.346  15.705   1
  -2   0   2 567.726  16.405   3
  -2   0  -2 116.190   4.730   1
  -2   0  -2 107.386   4.329   2
   2   0   2 111.394   4.457   1
   2   0   2 107.681   3.246   4
  -3   0  -2 98.7887  4.8317   1
  -3   0  -2 97.8838  4.5611   2
   3   0   2 105.055   4.793   1
  -4   0  -2 135.592   6.077   1
  -4   0  -2 127.763   6.346   2
   4   0   2 131.959   6.103   1
  -5   0  -2 46.1712  4.8112   2
  -5   0  -2 58.0655  5.0047   1
   5   0   2 53.0597  4.5389   1
  -6   0  -2 48.9885  5.2166   2
  -6   0  -2 59.6918  5.1090   1
   6   0   2 44.6955  4.6527   1
  -7   0  -2 12.4193  4.5657   2
  -7   1   2 12.2966  5.6437   2
   6  -1  -2 3.01280 2.47382   1
  -6   1   2 5.03835 5.02621   3
  -6   1   2 6.99818 2.52902   1
   5  -1  -2 8.73991 2.34658   1
  -5   1   2 6.21015 2.37822   1
  -5   1   2 8.97721 1.23869   4
   4  -1  -2 186.673   6.926   1
  -4   1   2 187.088   8.245   3
  -4   1   2 192.401   5.992   4
  -4   1   2 194.384   6.995   1
   3  -1  -2 257.436   8.365   1
  -3   1   2 257.748   8.368   1
  -3   1   2 257.938   9.450   3
   2  -1  -2 99.6842  3.8425   1
   2  -1  -2 103.319   4.320   3
  -2   1   2 103.717   4.412   3
  -2   1   2 108.115   3.974   1
  -1  -1  -2 2093.28   51.02   4
  -1  -1  -2 1949.38   53.89   1
  -1  -1  -2 2005.81   51.78   2
   1   1   2 1904.85   51.74   2
   1   1   2 1960.06   50.94   4
  -2  -1  -2 362.922  10.896   2
  -2  -1  -2 342.561  11.115   1
  -2  -1  -2 358.488  10.052   4
   2   1   2 347.761  10.030   4
   2   1   2 348.525  11.147   1
   2   1   2 365.640  10.950   2
  -3  -1  -2 54.3328  2.5591   4
  -3  -1  -2 58.9836  3.8730   2
  -3  -1  -2 55.8407  3.5612   1
   3   1   2 52.3965  3.4104   1
   3   1   2 52.9774  2.5758   4
  -4  -1  -2 55.5368  3.8308   1
  -4  -1  -2 56.5228  4.5179   2
   4   1   2 49.9882  3.7754   1
   4   1   2 49.3643  2.4652   4
  -5  -1  -2 970.678  29.485   1
  -5  -1  -2 1005.56   29.84   2
   5   1   2 988.587  29.566   1
  -6  -1  -2 117.161   6.681   1
  -6  -1  -2 123.022   7.408   2
  -7  -1  -2 7.58865 5.48225   2
  -7   2   2 19.5257  4.8115   3
   6  -2  -2 5.07666 3.06435   1
  -6   2   2 16.5565  5.6489   3
  -6   2   2 10.0657  3.1174   1
   5  -2  -2 1.33406 4.85409   1
  -5   2   2 7.05776 6.28686   3
  -5   2   2 5.41342 1.43621   4
  -5   2   2 7.08837 1.36245   4
   4  -2  -2 434.607  13.736   1
  -4   2   2 415.102  13.537   1
  -4   2   2 419.500  14.340   3
   3  -2  -2 844.733  24.538   1
  -3   2   2 826.193  24.505   3
  -3   2   2 861.291  24.568   1
   2  -2  -2 521.384  15.304   3
   2  -2  -2 524.038  15.501   1
  -2   2   2 504.325  15.483   1
  -2   2   2 528.625  15.453   3
   1  -2  -2 288.926   9.377   1
   1  -2  -2 295.410   8.985   3
  -1   2   2 291.408   9.506   1
  -1   2   2 299.506   9.203   3
  -1   2   2 295.327   8.852   4
   0  -2  -2 8537.14  240.22   1
   0  -2  -2 9613.19  224.96   4
   0  -2  -2 8203.65  228.18   3
   0   2   2 8996.56  225.96   4
   0   2   2 8719.75  228.29   3
   0   2   2 9191.41  240.09   1
  -1  -2  -2 3107.55   79.84   1
  -1  -2  -2 2921.87   75.74   4
   1   2   2 2958.34   75.73   4
   1   2   2 2808.30   79.69   1
   1   2   2 2931.40   76.86   2
  -2  -2  -2 624.591  18.314   1
  -2  -2  -2 608.841  17.194   4
  -2  -2  -2 607.471  17.894   2
  -2  -2  -2 609.199  18.319   1
   2   2   2 616.657  17.926   2
   2   2   2 612.668  17.237   4
  -3  -2  -2 303.348  10.848   2
  -3  -2  -2 303.232   9.672   4
  -3  -2  -2 307.213  10.593   1
  -3  -2  -2 307.299  10.497   1
   3   2   2 304.031   9.682   4
  -4  -2  -2 11.7791  2.1473   4
  -4  -2  -2 6.49007 2.34492   1
  -4  -2  -2 6.90633 2.72897   1
   4   2   2 10.8839  2.2299   4
  -5  -2  -2 96.5757  5.7599   1
  -5  -2  -2 89.4328  6.7001   2
  -5  -2  -2 97.9221  5.3597   1
   5   2   2 82.2590  4.3276   4
  -6  -2  -2 66.1563  6.5780   2
  -6  -2  -2 63.6605  4.9496   1
  -7  -2  -2 14.7736  5.6016   2
  -7   3   2 5.80183 3.43699   1
  -7   3   2 -0.8613  5.4737   3
   6  -3  -2 676.367  22.147   1
  -6   3   2 694.101  23.483   3
  -6   3   2 660.139  21.925   1
   5  -3  -2 5.96412 4.16415   1
  -5   3   2 25.6768  5.8437   3
  -5   3   2 12.6935  1.8555   4
  -5   3   2 18.8018  4.3025   1
   4  -3  -2 62.0590  4.6770   1
  -4   3   2 69.3265  4.4381   1
  -4   3   2 61.5895  3.1993   4
  -4   3   2 74.1822  5.7473   3
   3  -3  -2 414.662  13.575   3
   3  -3  -2 399.094  16.305   1
  -3   3   2 409.957  13.419   1
  -3   3   2 395.241  12.014   4
  -3   3   2 396.649  13.628   3
   2  -3  -2 587.037  16.927   3
   2  -3  -2 544.310  17.285   1
  -2   3   2 582.339  17.024   3
  -2   3   2 568.963  16.219   4
  -2   3   2 559.096  17.546   1
   1  -3  -2 1247.64   35.05   1
   1  -3  -2 1212.82   33.47   3
  -1   3   2 1224.26   33.11   4
  -1   3   2 1275.06   35.18   1
  -1   3   2 1200.29   33.54   3
   0  -3  -2 734.633  20.253   3
   0  -3  -2 688.390  20.961   1
   0  -3  -2 710.464  20.266   4
   0   3   2 702.762  20.151   4
   0   3   2 716.674  21.120   1
  -1  -3  -2 997.277  27.872   4
  -1  -3  -2 1010.56   29.50   1
   1   3   2 1017.20   37.10   1
   1   3   2 996.121  33.308   2
   1   3   2 1016.04   27.83   4
  -2  -3  -2 863.347  23.789   4
  -2  -3  -2 856.816  24.886   1
  -2  -3  -2 812.755  24.681   1
   2   3   2 843.985  23.644   4
   2   3   2 819.766  24.179   2
  -3  -3  -2 27.8799  3.3172   1
  -3  -3  -2 31.2018  3.3910   1
  -3  -3  -2 31.0579  4.3555   2
  -3  -3  -2 30.6200  3.3684   4
   3   3   2 30.8146  3.4226   4
   3   3   2 33.4260  3.9878   2
  -4  -3  -2 1320.10   37.99   2
  -4  -3  -2 1322.57   35.96   4
  -4  -3  -2 1316.01   38.01   1
  -4  -3  -2 1291.29   37.85   1
   4   3   2 1274.86   35.76   4
  -5  -3  -2 11.1085  4.1262   2
  -5  -3  -2 19.9710  3.4246   1
  -5  -3  -2 14.9548  2.9747   1
   5   3   2 13.3277  2.6939   4
  -6  -3  -2 10.7296  3.2351   1
  -7   4   2 6.07062 5.90921   3
  -7   4   2 7.20807 4.04865   1
   6  -4  -2 73.1675  6.2381   1
  -6   4   2 71.1547  6.0090   1
  -6   4   2 83.7249  7.8956   3
   5  -4  -2 4.44694 3.22535   1
  -5   4   2 0.35715 5.31878   3
  -5   4   2 6.78008 1.95186   4
   4  -4  -2 265.626  10.664   1
   4  -4  -2 264.647  10.722   3
  -4   4   2 263.913  10.704   1
  -4   4   2 268.969   9.022   4
  -4   4   2 269.519  10.989   3
   3  -4  -2 239.606   9.448   3
   3  -4  -2 254.616  10.030   1
  -3   4   2 235.073  10.084   1
  -3   4   2 243.997   8.539   4
  -3   4   2 237.972   9.780   3
   2  -4  -2 76.7606  4.8345   1
   2  -4  -2 72.2810  4.4192   3
  -2   4   2 73.2051  4.9118   1
  -2   4   2 71.5161  4.2367   4
  -2   4   2 76.0692  7.1990   3
   1  -4  -2 377.030  12.109   4
   1  -4  -2 367.172  11.725   3
   1  -4  -2 370.762  12.660   1
  -1   4   2 367.043  18.168   4
  -1   4   2 356.098  12.553   1
  -1   4   2 362.242  11.937   3
   0  -4  -2 3805.71   97.71   4
   0  -4  -2 3666.40  103.26   1
   0  -4  -2 3726.04   98.67   3
   0   4   2 3869.69   97.91   4
   0   4   2 3767.06  105.82   1
  -1  -4  -2 293.153  10.573   4
  -1  -4  -2 301.596  10.796   1
  -1  -4  -2 286.943  10.193   3
   1   4   2 294.150  10.528   2
   1   4   2 302.473  10.526   4
   1   4   2 304.597  11.126   1
  -2  -4  -2 95.4280  5.3541   1
  -2  -4  -2 86.7413  5.5752   4
   2   4   2 87.1066  5.3216   4
   2   4   2 86.0053  5.0722   2
   2   4   2 93.2132  5.7836   1
  -3  -4  -2 836.436  25.235   1
  -3  -4  -2 785.664  24.811   1
  -3  -4  -2 830.412  24.121   4
   3   4   2 785.850  23.934   4
   3   4   2 817.958  24.981   2
  -4  -4  -2 49.4887  4.0384   4
  -4  -4  -2 54.5917  4.1578   1
  -4  -4  -2 48.1383  4.5066   1
   4   4   2 55.4552  4.6863   4
  -5  -4  -2 8.85532 3.37342   4
  -5  -4  -2 1.90944 3.00642   1
  -5  -4  -2 2.78345 4.50282   2
  -6  -4  -2 35.7545  6.3929   2
  -7   5   2 33.7659  6.2846   3
  -7   5   2 24.1394  5.1786   1
  -6   5   2 29.7897  6.1268   3
  -6   5   2 26.6404  4.1653   1
   5  -5  -2 71.9944  6.3240   1
  -5   5   2 76.7097  6.6997   3
  -5   5   2 74.5285  4.1467   4
  -5   5   2 70.1175  5.4538   1
   4  -5  -2 112.480   6.682   3
   4  -5  -2 107.204   7.002   1
  -4   5   2 107.832   7.095   1
  -4   5   2 116.102   7.107   3
  -4   5   2 105.406   5.396   4
   3  -5  -2 86.1429  5.9867   1
   3  -5  -2 86.1185  5.4705   3
  -3   5   2 80.5435  5.1288   3
  -3   5   2 86.7564  4.9946   4
  -3   5   2 84.2845  6.0675   1
   2  -5  -2 836.261  24.761   3
   2  -5  -2 877.103  26.469   1
  -2   5   2 857.150  25.094   3
  -2   5   2 836.985  26.468   1
  -2   5   2 857.509  24.634   4
   1  -5  -2 7.00657 9.96510   1
   1  -5  -2 0.23925 6.86664   4
   1  -5  -2 -0.5217  2.6408   3
  -1   5   2 -1.3615  3.0145   4
  -1   5   2 1.09104 3.31318   1
  -1   5   2 -2.2397  3.6756   3
   0  -5  -2 837.920  33.010   1
   0  -5  -2 875.423  24.673   3
   0  -5  -2 845.048  24.918   4
   0   5   2 820.776  25.960   1
   0   5   2 854.462  24.861   4
  -1  -5  -2 5.90619 2.54663   3
  -1  -5  -2 3.63746 2.60886   4
  -1  -5  -2 1.48051 1.94384   1
   1   5   2 3.49481 3.43691   1
   1   5   2 3.46794 3.05128   2
   1   5   2 2.94236 3.14516   4
  -2  -5  -2 548.543  18.083   1
  -2  -5  -2 542.047  17.401   4
   2   5   2 530.238  17.490   4
   2   5   2 556.972  18.350   1
   2   5   2 520.742  17.601   2
  -3  -5  -2 57.3065  5.2066   4
  -3  -5  -2 44.3746  3.9163   1
  -3  -5  -2 48.0289  4.2965   1
   3   5   2 46.7199  5.0497   4
  -4  -5  -2 138.325   7.714   1
  -4  -5  -2 148.917   7.620   1
  -4  -5  -2 141.528   7.973   4
   4   5   2 149.070   7.908   4
  -5  -5  -2 43.5448  4.9909   4
  -5  -5  -2 34.5652  4.5012   1
  -7   6   2 18.5942  5.6471   1
  -7   6   2 -5.4098  5.0599   3
  -6   6   2 13.4525  5.1345   1
  -6   6   2 8.53737 4.22237   3
  -5   6   2 23.5976  5.0999   3
  -5   6   2 16.0749  2.9236   4
  -5   6   2 19.7840  4.3398   1
  -4   6   2 229.286   9.331   4
  -4   6   2 246.136  10.645   3
  -4   6   2 244.321  11.460   1
   3  -6  -2 4.44122 3.13404   3
   3  -6  -2 -0.2983  2.7363   1
  -3   6   2 3.21218 3.07228   4
  -3   6   2 -9.2560  4.4264   3
  -3   6   2 0.99962 4.15072   1
   2  -6  -2 169.518   7.796   3
   2  -6  -2 146.323  15.947   1
  -2   6   2 161.869   8.778   1
  -2   6   2 172.635   8.411   4
  -2   6   2 178.145   8.554   3
   1  -6  -2 50.6882  4.4461   3
   1  -6  -2 43.7750  6.0703   4
   1  -6  -2 34.3895 17.1152   1
  -1   6   2 45.4584  5.2703   3
  -1   6   2 37.4590  7.0260   4
  -1   6   2 42.1951  8.9701   1
   0  -6  -2 22.9186  4.6964   4
   0  -6  -2 34.8326  4.3724   1
   0  -6  -2 36.0857  3.4355   3
   0   6   2 24.4640  3.4731   4
   0   6   2 33.2790  4.7847   1
  -1  -6  -2 22.1966  3.6857   3
  -1  -6  -2 22.1510  3.9926   1
  -1  -6  -2 18.4324  4.5979   4
   1   6   2 15.0457  4.0152   2
   1   6   2 32.0809  4.8148   1
   1   6   2 23.7778  3.6484   4
  -2  -6  -2 18.3530  3.2514   3
  -2  -6  -2 15.6766  3.8736   1
   2   6   2 19.0556 20.3112   1
  -3  -6  -2 120.358   7.579   1
  -3  -6  -2 118.934   7.709   4
  -4  -6  -2 211.370  10.024   4
  -4  -6  -2 235.977  10.705   1
  -6   7   2 3.13459 5.59761   3
  -6   7   2 7.35388 5.57071   1
  -5   7   2 19.5361  5.7208   1
  -4   7   2 -2.2116  5.0180   1
  -4   7   2 5.92021 4.93517   3
   3  -7  -2 65.4181  5.5440   3
  -3   7   2 62.8183  7.0211   1
  -3   7   2 57.3985  5.5780   3
   2  -7  -2 430.741  14.960   3
  -2   7   2 435.028  17.139   1
  -2   7   2 459.771  15.865   3
   1  -7  -2 122.291   6.579   3
   1  -7  -2 133.897   8.159   4
  -1   7   2 111.999   7.970   1
   0  -7  -2 -1.4433  3.0772   3
   0  -7  -2 3.99646 4.87345   4
   0   7   2 4.90656 4.52359   1
  -1  -7  -2 258.049  10.733   3
  -1  -7  -2 267.541  11.980   4
   1   7   2 271.291  12.051   1
  -2  -7  -2 88.5513  7.4581   4
   2   7   2 84.3266  7.2802   1
  -3  -7  -2 -8.8238  5.4115   4
  -3  -7  -2 2.63099 3.43037   1
  -4  -7  -2 76.2583  6.9686   1
  -4  -7  -2 60.3270  6.8736   4
  -6   8   2 19.3867  6.4329   3
  -5   8   2 38.6075  5.4085   3
  -5   8   2 51.4526  7.3133   1
  -4   8   2 9.22009 4.88010   3
  -4   8   2 2.68014 5.39969   1
  -3   8   2 47.1209  5.7606   3
  -3   8   2 45.1308  5.3291   1
  -2   8   2 8.36568 3.84820   3
  -2   8   2 -10.413   4.913   1
   1  -8  -2 85.3908  7.6281   4
  -1   8   2 95.3996  7.0998   1
   0  -8  -2 31.1012  5.3338   4
   0   8   2 23.7250  5.9790   1
  -1  -8  -2 18.1502  6.1880   4
  -2  -8  -2 4.26377 5.30421   4
   2   8   2 4.54114 4.99107   1
  -3  -8  -2 126.238   9.392   4
  -3  -8  -2 143.173   9.457   1
  -4  -8  -2 -2.7627  4.7331   1
  -4  -8  -2 -5.8526  5.4784   4
  -5   9   2 0.79985 6.07574   1
  -5   9   2 9.02712 5.87031   3
  -4   9   2 4.37107 4.73221   3
  -4   9   2 4.95594 5.52425   1
  -3   9   2 -6.2730  3.8032   3
  -3   9   2 -0.6355  5.5121   1
  -2   9   2 29.9830  5.1911   3
   1  -9  -2 51.9740  6.1099   4
  -1   9   2 58.0741  7.5110   1
   0  -9  -2 181.219  10.508   4
   0   9   2 190.948  11.567   1
  -1  -9  -2 155.728  10.378   4
   1   9   2 157.569  10.470   1
  -2  -9  -2 2.31555 4.37748   4
   2   9   2 -1.0105  5.7637   1
  -4  10   2 0.40643 5.02707   3
  -4  10   2 1.00279 4.34738   1
  -3  10   2 52.5293  6.4868   3
  -3  10   2 49.9113  7.6250   1
  -2  10   2 67.8289  8.4980   1
  -1  10   2 19.7924  7.2333   1
  -1 -10  -2 17.8487  5.6463   4
   1  10   2 8.85266 5.79949   1
  -2  10  -3 11.0099  4.7776   1
  -3  10  -3 -0.1989  5.4925   1
   3   9  -3 46.9488  6.8727   1
   2   9  -3 14.4738  5.0397   1
   1   9  -3 121.999   8.060   1
  -2   9  -3 8.58891 5.31895   1
  -3   9  -3 14.0769  3.8377   3
  -3   9  -3 9.81253 4.08593   1
  -4   9  -3 17.4987  4.4760   3
  -4   9  -3 15.4863  6.2002   1
   4  -9   3 7.84152 3.78280   4
  -5   9  -3 26.9494  6.4832   1
  -5   9  -3 21.2608  5.4413   3
   3   8  -3 -5.1526  3.6546   1
   2   8  -3 82.9683  6.9451   1
   1   8  -3 80.8084  7.0863   1
  -1  -8   3 79.2338  5.0867   3
  -1  -8   3 94.9140  8.0464   4
   0  -8   3 12.0496  2.7207   3
   0  -8   3 7.05294 5.78010   4
   1  -8   3 95.9209  5.0670   3
   1  -8   3 91.4103  6.6534   4
  -2   8  -3 204.269   8.727   3
   2  -8   3 192.485   8.108   3
   2  -8   3 206.476  10.625   4
  -3   8  -3 173.699   8.131   3
   3  -8   3 154.106   7.351   3
   3  -8   3 177.881   9.271   4
  -4   8  -3 41.4622  6.6501   1
  -4   8  -3 27.0653  3.8078   3
   4  -8   3 29.8373  5.0985   4
  -5   8  -3 31.1283  5.1400   3
  -6   8  -3 18.5751  5.2457   3
  -5  -7   3 93.2807  7.1468   4
  -4  -7   3 7.23458 3.86578   4
   3   7  -3 4.95620 3.70210   1
  -3  -7   3 -2.0419  2.6805   1
  -3  -7   3 0.34072 4.69542   4
   2   7  -3 142.411   7.927   1
  -2  -7   3 135.828   7.308   1
  -2  -7   3 141.762   6.877   3
  -2  -7   3 148.856   8.817   4
   1   7  -3 99.8369  6.7361   1
  -1  -7   3 85.9944  7.1089   4
  -1  -7   3 84.8764  6.0945   1
  -1  -7   3 93.9215  5.1137   3
   0  -7   3 1.72683 1.98574   3
   0  -7   3 -5.9914  4.2054   4
   0  -7   3 -0.2879  4.1415   1
  -1   7  -3 146.151   9.155   1
   1  -7   3 124.202   8.626   4
   1  -7   3 143.304   6.074   3
  -2   7  -3 22.6241  7.6092   1
  -2   7  -3 27.1764 13.8432   4
   2  -7   3 18.9448  3.1476   3
   2  -7   3 21.1171  6.0691   4
  -3   7  -3 45.0285  5.7168   1
  -3   7  -3 39.4626  4.4023   4
  -3   7  -3 48.6833  4.5356   3
   3  -7   3 46.9018  5.2723   4
   3  -7   3 43.9296  3.7026   3
  -4   7  -3 42.2073  4.6829   3
  -4   7  -3 42.1962  4.0204   4
  -4   7  -3 53.8034  6.5588   1
   4  -7   3 41.2805  4.4541   4
  -5   7  -3 5.03555 4.09774   3
  -5   7  -3 4.71807 4.63396   1
  -6   7  -3 31.4190  5.6776   3
  -6   7  -3 48.0808  7.1606   1
  -5  -6   3 98.1820  7.3149   4
  -4  -6   3 4.59310 3.32870   4
  -4  -6   3 11.6947  2.9273   1
   3   6  -3 50.3266  4.5425   1
  -3  -6   3 52.3960  4.1642   1
  -3  -6   3 51.1708  5.6606   4
   2   6  -3 8.92846 3.59037   1
   2   6  -3 4.09049 4.37245   4
  -2  -6   3 16.2213  5.0426   4
  -2  -6   3 14.2551  3.0308   1
   1   6  -3 24.7546  4.1867   4
   1   6  -3 30.8979  4.3076   2
   1   6  -3 25.4787  3.8356   1
  -1  -6   3 25.0345  4.8255   4
  -1  -6   3 23.9033  2.7526   3
  -1  -6   3 27.3765  3.5988   1
   0   6  -3 142.884   7.727   1
   0   6  -3 149.275   7.470   4
   0  -6   3 149.634   5.828   3
   0  -6   3 148.281   7.777   4
   0  -6   3 140.682   7.283   1
  -1   6  -3 381.384  14.436   1
  -1   6  -3 390.148  13.692   4
  -1   6  -3 373.201  12.208   3
   1  -6   3 413.346  14.643   1
   1  -6   3 392.199  13.982   4
   1  -6   3 404.932  12.197   3
  -2   6  -3 206.452   8.690   4
  -2   6  -3 214.004   7.819   3
  -2   6  -3 195.600   9.460   1
   2  -6   3 212.236   9.212   4
   2  -6   3 200.642  10.490   1
   2  -6   3 212.579   7.730   3
  -3   6  -3 -1.0388  3.3370   1
  -3   6  -3 3.37646 2.63479   4
   3  -6   3 -1.9423  3.6734   4
   3  -6   3 0.39522 2.34300   3
  -4   6  -3 1.10611 2.01783   4
  -4   6  -3 -0.0534  3.0374   3
  -4   6  -3 4.23694 3.84854   1
   4  -6   3 4.08103 2.83742   4
  -5   6  -3 20.4624  4.6570   3
  -6   6  -3 7.41601 4.96557   1
  -6   6  -3 3.63123 4.39623   3
  -7   6  -3 21.7409  6.4853   3
  -7   6  -3 31.1885  6.7627   1
  -6  -5   3 -0.9192  5.6940   2
  -5  -5   3 9.86908 4.91331   2
  -5  -5   3 8.04157 4.12847   4
   4   5  -3 -1.4742  4.2393   4
  -4  -5   3 -4.1879  4.8422   2
  -4  -5   3 3.29761 2.44573   1
  -4  -5   3 -3.1469  3.9360   4
  -4  -5   3 0.90221 1.96426   1
   3   5  -3 1600.04   44.59   1
   3   5  -3 1577.72   43.92   4
  -3  -5   3 1573.88   44.38   1
  -3  -5   3 1535.34   43.90   4
   2   5  -3 65.0546  4.5555   1
   2   5  -3 68.8273  5.3069   4
   2   5  -3 63.3457  5.2196   2
  -2  -5   3 59.1593  4.6933   4
  -2  -5   3 56.1171  3.9996   1
   1   5  -3 191.696   8.418   2
   1   5  -3 207.210   8.356   4
   1   5  -3 200.248   8.385   1
  -1  -5   3 196.562   8.757   4
  -1  -5   3 190.759   7.080   3
  -1  -5   3 196.471   7.914   1
   0   5  -3 194.061   8.301   1
   0   5  -3 193.871   8.052   4
   0  -5   3 193.246   8.096   1
   0  -5   3 176.343   9.905   4
   0  -5   3 190.517   6.553   3
  -1   5  -3 325.923  10.247   3
  -1   5  -3 325.380  11.985   1
  -1   5  -3 335.677  11.353   4
   1  -5   3 326.345  11.326   4
   1  -5   3 346.387  10.220   3
   1  -5   3 330.064  11.928   1
  -2   5  -3 1038.90   29.39   3
  -2   5  -3 1064.06   32.27   1
  -2   5  -3 1063.22   29.72   4
   2  -5   3 1065.64   32.10   1
   2  -5   3 1076.06   29.42   3
   2  -5   3 1086.82   29.89   4
  -3   5  -3 -1.0322  3.9503   1
  -3   5  -3 4.47575 2.18480   3
  -3   5  -3 5.28091 2.25225   4
   3  -5   3 -1.5779  4.7353   1
   3  -5   3 4.05801 2.54209   4
  -4   5  -3 -0.0115  1.7087   4
  -4   5  -3 0.32880 2.96354   3
  -4   5  -3 2.39184 3.93657   1
   4  -5   3 -2.8198  4.0332   1
  -5   5  -3 33.4146  5.1467   1
  -5   5  -3 43.2484  5.0423   3
  -5   5  -3 32.7840  2.2080   4
  -6   5  -3 -6.0746  4.7261   1
  -6   5  -3 5.95691 3.54422   3
  -7   5  -3 5.39511 4.42113   3
  -7   5  -3 -3.2086  5.1653   1
  -6  -4   3 19.3510  3.8631   4
  -6  -4   3 26.8430  6.3393   2
  -5  -4   3 27.7069  2.3709   1
  -5  -4   3 23.9626  5.4514   2
  -5  -4   3 33.3289  4.3564   4
   4   4  -3 2.24968 6.27385   4
  -4  -4   3 3.25023 2.01184   1
  -4  -4   3 7.31341 4.14020   4
   3   4  -3 36.8797  4.3023   4
   3   4  -3 47.3797  4.1772   2
   3   4  -3 44.9280  3.3377   1
  -3  -4   3 43.4982  4.4981   4
  -3  -4   3 43.7285  2.9306   1
  -3  -4   3 47.1339  5.1313   2
   2   4  -3 346.437  16.892   1
   2   4  -3 362.942  12.180   4
   2   4  -3 341.917  12.113   2
  -2  -4   3 357.303  11.361   1
  -2  -4   3 337.619  11.858   4
   1   4  -3 32.0681  3.6847   2
   1   4  -3 29.2203  3.8526   4
   1   4  -3 31.2542  3.5475   1
  -1  -4   3 34.3485  2.7751   1
  -1  -4   3 42.4338  4.4167   4
  -1   4  -3 44.5756  3.4815   4
  -1   4  -3 41.3647  2.6841   3
  -1   4  -3 44.7307  3.6100   1
   1  -4   3 42.0282  2.3393   3
   1  -4   3 41.9271  3.7439   1
   1  -4   3 36.7985  3.5641   4
  -2   4  -3 1.10112 1.87086   4
  -2   4  -3 0.68234 1.38978   3
  -2   4  -3 -1.4815  3.1093   1
   2  -4   3 -3.0527  2.0878   4
   2  -4   3 -1.9728  4.9182   1
   2  -4   3 -0.4993  1.5202   3
  -3   4  -3 797.154  25.183   1
  -3   4  -3 807.645  23.535   3
  -3   4  -3 830.144  22.438   4
   3  -4   3 788.549  22.420   4
   3  -4   3 838.020  25.220   1
  -4   4  -3 15.5331  4.0881   3
  -4   4  -3 10.7810  1.5292   4
  -4   4  -3 12.2713  4.8614   1
   4  -4   3 8.99195 3.20406   1
  -5   4  -3 39.3913  5.4751   1
  -5   4  -3 35.4631  5.3419   3
   5  -4   3 45.1763  4.7733   1
  -6   4  -3 -5.8838  5.0233   3
  -6   4  -3 -4.9980  4.7437   1
  -7   4  -3 69.1753  6.7272   3
  -7   4  -3 80.2654  6.5398   1
  -7  -3   3 65.2801  7.9302   2
  -7  -3   3 70.5623  8.6083   3
  -6  -3   3 33.7900  3.9010   4
  -6  -3   3 32.3479  6.5006   2
  -5  -3   3 41.4849  2.4310   1
  -5  -3   3 40.1171  2.3424   1
  -5  -3   3 38.1371  5.3289   2
  -5  -3   3 43.0480  3.8532   4
   4   3  -3 142.782   6.697   4
  -4  -3   3 149.859   7.695   2
  -4  -3   3 154.676   6.854   4
  -4  -3   3 139.077   5.228   1
  -4  -3   3 139.167   5.161   1
   3   3  -3 1071.84   29.68   4
   3   3  -3 1074.85   31.02   2
  -3  -3   3 1063.12   30.97   2
  -3  -3   3 1059.16   29.48   1
  -3  -3   3 1058.09   29.59   4
  -3  -3   3 1030.09   29.43   1
   2   3  -3 3.96601 2.79915   2
   2   3  -3 3.79076 2.69698   4
   2   3  -3 0.15478 1.62160   1
  -2  -3   3 -2.9098  3.2781   2
  -2  -3   3 6.08019 2.88855   4
  -2  -3   3 0.70572 1.32573   1
   1   3  -3 2946.03   78.67   2
   1   3  -3 3018.48   77.36   4
   1   3  -3 3023.75   80.63   1
  -1  -3   3 2904.63   84.32   1
  -1  -3   3 3003.56   77.43   4
   0   3  -3 188.068   6.593   4
   0   3  -3 186.934   6.779   1
   0  -3   3 184.995   5.476   3
   0  -3   3 190.684   6.758   1
   0  -3   3 171.774   6.497   4
  -1   3  -3 114.059   3.898   3
  -1   3  -3 115.855   4.673   4
  -1   3  -3 119.014   5.380   1
   1  -3   3 111.857   4.770   4
   1  -3   3 105.881   5.071   1
   1  -3   3 118.108   3.904   3
  -2   3  -3 2.99501 1.45202   4
  -2   3  -3 4.62764 1.78983   3
  -2   3  -3 5.27356 2.68985   1
   2  -3   3 0.41654 1.65494   4
   2  -3   3 2.06932 2.25363   1
  -3   3  -3 2080.06   56.07   3
  -3   3  -3 2057.51   54.09   4
  -3   3  -3 2174.88   58.73   1
   3  -3   3 2050.07   53.75   4
   3  -3   3 2078.00   60.70   1
  -4   3  -3 1009.47   30.47   3
  -4   3  -3 1073.00   31.97   1
   4  -3   3 1079.61   31.82   1
  -5   3  -3 466.775  17.005   1
  -5   3  -3 459.297  16.801   3
   5  -3   3 494.780  17.173   1
  -6   3  -3 51.0817  5.4209   3
  -6   3  -3 48.0257  5.8449   1
  -7   3  -3 16.6325  5.3677   1
  -7   3  -3 1.66478 4.37821   3
  -7  -2   3 25.5751  5.2578   2
  -7  -2   3 35.2505  7.0491   3
  -6  -2   3 19.9479  2.9031   4
  -6  -2   3 26.1908  5.9219   2
  -5  -2   3 53.8796  5.1879   2
  -5  -2   3 50.1643  2.4124   1
  -5  -2   3 50.5882  2.5698   1
  -5  -2   3 45.9223  3.5982   4
  -4  -2   3 412.380  13.044   4
  -4  -2   3 414.373  12.148   1
  -4  -2   3 427.281  15.015   2
  -4  -2   3 427.989  12.214   1
   3   2  -3 242.872   8.533   4
  -3  -2   3 261.366   9.759   2
  -3  -2   3 239.032   7.317   1
  -3  -2   3 249.991   8.568   4
  -3  -2   3 238.059   7.338   1
   2   2  -3 214.111   7.574   4
   2   2  -3 223.795   6.715   1
   2   2  -3 219.931   8.219   2
  -2  -2   3 216.218   7.476   4
  -2  -2   3 217.911   6.581   1
  -2  -2   3 219.732   8.289   2
   1   2  -3 53.4411  3.1469   2
   1   2  -3 51.0321  2.3364   1
   1   2  -3 50.3590  3.0699   4
  -1  -2   3 44.9850  2.1918   1
  -1  -2   3 47.8815  3.1701   2
  -1  -2   3 49.4460  3.1763   4
   0   2  -3 4822.77  125.00   2
   0   2  -3 4856.14  124.23   4
   0   2  -3 5029.48  129.89   1
   0  -2   3 4609.64  130.87   1
   0  -2   3 4857.69  123.17   4
  -1   2  -3 97.1702  3.2651   3
  -1   2  -3 96.7281  4.4133   1
  -1   2  -3 96.6643  3.5199   4
   1  -2   3 95.9641  3.5757   4
   1  -2   3 88.1335  4.0036   1
  -2   2  -3  0.4596 21.6563   1
   2  -2   3 2.79480 1.09795   4
   2  -2   3 2.01024 7.53234   1
  -3   2  -3 241.549   9.132   1
   3  -2   3 243.580   9.228   1
  -4   2  -3 22.0595  4.2633   1
   4  -2   3 25.3623  4.1136   1
  -5   2  -3 866.832  26.885   1
   5  -2   3 841.204  26.698   1
  -6   2  -3 34.3863  5.0389   3
  -6   2  -3 44.6801  5.2218   1
   6  -2   3 38.8348  4.9097   1
  -7   2  -3 27.8413  4.8552   1
  -7   2  -3 25.3924  5.3719   2
  -7   2  -3 40.4370  6.8106   3
  -7  -1   3 -5.2252  4.4304   3
  -7  -1   3 4.86646 5.63647   2
  -6  -1   3 97.8533  4.1521   1
  -6  -1   3 94.9386  4.5734   4
  -6  -1   3 118.501   8.067   2
  -5  -1   3 15.6882  1.5390   1
  -5  -1   3 15.6220  4.4493   2
  -5  -1   3 17.8247  2.2566   4
  -5  -1   3 15.4379  1.4451   1
  -4  -1   3 400.222  12.150   4
  -4  -1   3 417.440  14.275   2
  -4  -1   3 387.032  11.550   1
  -4  -1   3 403.642  11.625   1
  -3  -1   3 174.887   7.469   2
  -3  -1   3 175.385   6.274   4
  -2  -1   3 30.0125  2.3359   4
  -2  -1   3 32.5556  2.6658   2
   1   1  -3 1487.82   48.15   2
   1   1  -3 2047.12   50.58   1
  -1  -1   3 1848.89   47.68   4
  -1  -1   3 1961.20   48.54   2
  -1   1  -3 4203.80  118.12   1
   1  -1   3 4316.96  109.09   4
  -2   1  -3 2493.08   67.41   1
   2  -1   3 2483.09   67.64   1
   2  -1   3 2426.87   64.82   4
  -3   1  -3 1796.37   50.80   1
   3  -1   3 1844.13   50.86   1
  -4   1  -3 378.489  13.212   1
   4  -1   3 369.294  13.061   1
  -5   1  -3 76.5433  6.0997   1
  -5   1  -3 79.6750  5.9803   2
   5  -1   3 81.2118  5.8630   1
  -6   1  -3 4.81226 3.24761   1
  -6   1  -3 4.68980 4.11762   2
   6  -1   3 -0.0288  3.3564   1
  -7   1  -3 16.0513  5.0590   3
  -7   1  -3 28.4206  5.3402   2
  -7   1  -3 16.5854  4.2091   1
  -7   0   3 60.5589  7.2645   3
  -7   0   3 62.6765  7.5940   2
   6   0  -3 46.8247  3.1370   1
  -6   0   3 64.7872  6.6691   2
  -6   0   3 56.9837  2.8856   4
  -6   0   3 57.8213  3.4277   1
  -6   0   3 63.5097  7.0151   3
   5   0  -3 0.53281 1.37640   1
  -5   0   3 -0.0416  1.3493   4
  -5   0   3 -2.3841  4.4339   3
  -5   0   3 5.14184 3.96958   2
  -5   0   3 0.61343 1.33049   1
   4   0  -3 394.843  11.844   1
  -4   0   3 399.358  11.877   1
  -4   0   3 400.097  13.709   3
  -4   0   3 408.238  11.811   4
   3   0  -3 662.820  18.558   1
  -3   0   3 667.664  18.360   4
  -3   0   3 668.920  18.570   1
  -3   0   3 679.043  19.996   3
   2   0  -3 1518.31   42.46   1
  -2   0   3 1678.02   42.34   1
  -2   0   3 1500.05   41.76   3
  -1   0  -3 8174.78  210.35   1
   1   0   3 6129.59  193.59   1
  -2   0  -3 2578.68   70.46   1
  -2   0  -3 2586.79   67.42   2
   2   0   3 2541.61   65.78   4
   2   0   3 2640.97   70.44   1
  -3   0  -3 271.099   9.149   2
  -3   0  -3 274.894   9.725   1
   3   0   3 273.737   9.660   1
  -4   0  -3 721.533  22.015   1
  -4   0  -3 690.222  21.292   2
   4   0   3 729.380  21.973   1
  -5   0  -3 885.592  26.747   2
  -5   0  -3 864.274  26.897   1
   5   0   3 883.565  26.975   1
  -6   0  -3 21.2737  3.9060   2
  -6   0  -3 30.7428  4.5205   1
   6   0   3 33.5230  4.4025   1
  -7   0  -3 -2.8844  3.6631   1
  -7   0  -3 -2.1289  4.2285   2
  -7   1   3 11.9067  5.0949   3
  -7   1   3 19.8552  5.7821   2
   6  -1  -3 57.8731  3.7570   1
  -6   1   3 54.9858  3.6585   1
  -6   1   3 54.5044  5.4671   3
   5  -1  -3 55.9931  3.4381   1
  -5   1   3 49.9675  3.3130   1
  -5   1   3 51.4168  2.7241   4
  -5   1   3 53.0154  5.8720   3
   4  -1  -3 13.1246  1.9380   1
  -4   1   3 21.3329  3.8849   3
  -4   1   3 13.5308  1.8382   1
   3  -1  -3 254.582   8.372   1
  -3   1   3 263.600   8.420   1
  -3   1   3 272.556   9.749   3
   2  -1  -3 42.1307  2.6831   3
   2  -1  -3 44.1796  2.2912   1
  -2   1   3 48.7398  3.3405   3
  -2   1   3 49.3839  2.4564   1
   1  -1  -3 307.483   9.753   1
  -1   1   3 340.269   9.820   3
  -1   1   3 344.260   9.905   1
  -1  -1  -3 665.771  19.721   1
  -1  -1  -3 650.342  18.877   1
   1   1   3 642.824  17.694   2
   1   1   3 638.807  17.511   4
  -2  -1  -3 7.70030 2.35067   1
  -2  -1  -3 2.41065 1.94796   2
   2   1   3 1.56640 1.29627   2
   2   1   3 0.27469 1.80233   1
   2   1   3 0.02130 1.26686   4
  -3  -1  -3 679.390  19.967   2
  -3  -1  -3 687.343  20.731   1
   3   1   3 672.397  18.488   4
   3   1   3 692.541  20.715   1
  -4  -1  -3 0.83951 2.82743   2
  -4  -1  -3 -0.9680  2.2936   1
   4   1   3 0.50225 1.15802   4
   4   1   3 2.01650 2.46807   1
  -5  -1  -3 9.78057 3.53469   2
  -5  -1  -3 -7.9563  4.3257   1
   5   1   3 5.54305 3.39460   1
  -6  -1  -3 9.16086 3.33635   2
  -6  -1  -3 11.7830  3.2029   1
  -7  -1  -3 90.7918  7.8031   2
  -7   2   3 -2.0635  5.2687   3
   6  -2  -3 36.1557  3.8193   1
  -6   2   3 41.5970  6.2919   3
  -6   2   3 28.2967  3.3995   1
   5  -2  -3 700.551  21.393   1
  -5   2   3 699.266  21.439   1
  -5   2   3 710.432  23.066   3
   4  -2  -3 93.9230  4.6437   1
  -4   2   3 97.6961  6.1795   3
  -4   2   3 95.6342  4.6394   1
   3  -2  -3 447.357  13.837   1
   3  -2  -3 457.702  14.473   3
  -3   2   3 438.998  14.603   3
  -3   2   3 450.858  13.997   1
   2  -2  -3 3.24734 2.37576   3
  -2   2   3 1.33520 1.85995   3
  -2   2   3 4.14897 2.01425   1
   1  -2  -3 100.531   4.208   3
   1  -2  -3 100.348   4.326   1
  -1   2   3 105.638   4.688   1
  -1   2   3 93.4861  4.5195   3
   0  -2  -3 2144.08   54.57   3
   0  -2  -3 2064.60   56.45   1
   0   2   3 1938.24   56.42   1
   0   2   3 2122.37   53.74   4
   0   2   3 2064.59   54.56   3
  -1  -2  -3 86.9753  6.5185   1
   1   2   3 80.9927  3.9655   4
   1   2   3 82.5197  3.8829   2
   1   2   3 79.7571 14.4072   1
  -2  -2  -3 134.790   5.777   1
  -2  -2  -3 132.533   5.219   4
  -2  -2  -3 123.185   5.569   1
  -2  -2  -3 123.377   5.535   2
   2   2   3 124.605   5.499   2
   2   2   3 127.402   5.184   4
  -3  -2  -3 1262.09   36.43   1
  -3  -2  -3 1300.78   36.45   1
  -3  -2  -3 1242.75   35.33   2
   3   2   3 1268.30   33.98   4
   3   2   3 1265.50   35.42   2
  -4  -2  -3 748.690  23.035   2
  -4  -2  -3 764.804  23.182   1
  -4  -2  -3 743.984  23.246   1
   4   2   3 749.407  21.036   4
  -5  -2  -3 468.202  15.973   2
  -5  -2  -3 406.989  14.829   1
  -5  -2  -3 436.781  15.232   1
   5   2   3 415.688  12.817   4
  -6  -2  -3 10.8977  3.6070   1
  -6  -2  -3 11.2458  4.2302   2
  -7  -2  -3 -9.3855  5.2418   2
  -7   3   3 -12.522   5.950   3
   6  -3  -3 6.02331 3.89307   1
  -6   3   3 8.89459 1.71925   4
  -6   3   3 26.2013  6.7411   3
  -6   3   3 9.47294 3.78654   1
   5  -3  -3 42.6521  3.6446   1
  -5   3   3 42.5426  4.3305   1
  -5   3   3 39.0476  2.6714   4
  -5   3   3 34.3080  6.0807   3
   4  -3  -3 289.581  10.358   1
  -4   3   3 282.498  10.391   1
  -4   3   3 265.870   8.943   4
  -4   3   3 279.075  10.794   3
   3  -3  -3 1903.34   52.02   1
   3  -3  -3 1860.91   50.67   3
  -3   3   3 1841.45   50.78   3
  -3   3   3 1857.55   52.05   1
  -3   3   3 1835.81   48.88   4
   2  -3  -3 815.644  23.585   1
   2  -3  -3 803.381  22.845   3
  -2   3   3 784.256  22.867   3
  -2   3   3 781.542  22.056   4
  -2   3   3 788.696  23.569   1
   1  -3  -3 2045.54   56.89   1
   1  -3  -3 2039.75   54.78   3
  -1   3   3 2058.50   73.55   4
  -1   3   3 2152.46   57.16   1
  -1   3   3 2005.19   54.86   3
   0  -3  -3 8080.82  212.40   3
   0  -3  -3 8395.72  233.13   1
   0   3   3 8056.28  230.78   1
   0   3   3 8381.12  210.95   4
  -1  -3  -3 5433.87  152.00   1
  -1  -3  -3 5373.98  140.52   4
   1   3   3 5649.94  140.64   4
   1   3   3 5680.27  149.52   1
   1   3   3 5316.06  142.40   2
  -2  -3  -3 207.116   7.642   4
  -2  -3  -3 209.977   8.211   1
  -2  -3  -3 206.570   8.494   1
   2   3   3 213.604   8.176   2
   2   3   3 210.354   7.885   4
  -3  -3  -3 387.747  13.603   1
  -3  -3  -3 392.017  12.772   4
  -3  -3  -3 384.029  13.391   1
  -3  -3  -3 382.111  13.366   2
   3   3   3 415.479  13.660   2
   3   3   3 379.930  12.655   4
  -4  -3  -3 311.802  11.961   1
  -4  -3  -3 305.746  11.531   1
  -4  -3  -3 297.352  11.660   2
   4   3   3 294.670  10.489   4
  -5  -3  -3 12.2402  2.9524   1
   5   3   3 12.6483  2.8278   4
  -6  -3  -3 4.38053 4.83819   2
  -7   4   3 22.4147  4.4300   1
  -7   4   3 16.6445  6.3144   3
   6  -4  -3 9.71801 4.01585   1
  -6   4   3 17.0315  5.9541   3
   5  -4  -3 2.65174 3.56836   1
  -5   4   3 -1.1632  4.6764   3
  -5   4   3 -3.5265  3.6768   1
  -5   4   3 6.28460 2.01722   4
   4  -4  -3 30.1538  4.2147   3
   4  -4  -3 19.5994  3.7568   1
  -4   4   3 23.3897  4.0233   1
  -4   4   3 23.2136  2.7269   4
  -4   4   3 18.5308  3.7042   3
   3  -4  -3 42.4912  3.7463   1
   3  -4  -3 42.2727  3.8611   3
  -3   4   3 37.1524  4.3764   1
  -3   4   3 36.3304  3.3880   4
  -3   4   3 41.6579  3.9513   3
   2  -4  -3 19.3257  3.2776   1
   2  -4  -3 16.0970  3.0479   3
  -2   4   3 19.1920  2.3904   4
  -2   4   3 24.1784  3.6632   3
  -2   4   3 12.7372  3.5095   1
   1  -4  -3 493.253  15.079   3
   1  -4  -3 463.461  16.033   1
  -1   4   3 498.665  15.312   3
  -1   4   3 471.828  15.932   1
  -1   4   3 507.259  15.219   4
   0  -4  -3 1891.52   52.37   3
   0  -4  -3 1918.53   88.76   1
   0  -4  -3 1980.57   52.12   4
   0   4   3 2038.16  183.84   4
   0   4   3 1968.56   59.81   1
  -1  -4  -3 926.887  27.746   1
  -1  -4  -3 914.591  26.617   3
  -1  -4  -3 942.632  26.634   4
   1   4   3 920.304  27.855   1
   1   4   3 947.175  26.871   2
   1   4   3 925.366  26.463   4
  -2  -4  -3 402.227  13.523   4
  -2  -4  -3 387.890  13.728   1
   2   4   3 397.593  13.186   4
   2   4   3 417.868  14.445   1
   2   4   3 408.512  13.757   2
  -3  -4  -3 900.563  26.560   4
  -3  -4  -3 913.126  27.936   1
  -3  -4  -3 903.458  27.823   1
   3   4   3 943.734  26.736   4
   3   4   3 903.903  27.245   2
  -4  -4  -3 25.6841  3.6214   1
  -4  -4  -3 14.6293  3.5932   4
  -4  -4  -3 16.4391  3.7551   1
   4   4   3 18.6517  3.6477   4
  -5  -4  -3 5.81183 3.38518   1
  -7   5   3 61.5349  6.0937   1
  -7   5   3 54.4602  6.4876   3
  -6   5   3 9.57347 5.59683   3
  -6   5   3 3.83096 3.75059   1
   5  -5  -3 3.93813 2.93181   1
  -5   5   3 10.7487  4.2918   1
  -5   5   3 6.13147 2.09775   4
   4  -5  -3 78.8214  5.9487   3
   4  -5  -3 82.7105  6.2308   1
  -4   5   3 75.3318  4.5577   4
  -4   5   3 74.4564  5.7913   3
  -4   5   3 84.2578  6.3869   1
   3  -5  -3 66.2223  4.9444   3
   3  -5  -3 69.3026  5.4679   1
  -3   5   3 58.0936  4.7749   1
  -3   5   3 63.5163  4.5219   4
  -3   5   3 59.2881  5.3541   3
   2  -5  -3 183.334   7.715   3
   2  -5  -3 183.761  11.464   1
  -2   5   3 182.385   8.166   4
  -2   5   3 187.047   8.575   3
  -2   5   3 196.668   9.171   1
   1  -5  -3 1439.58   39.88   3
   1  -5  -3 1464.41   45.04   1
  -1   5   3 1461.88   40.20   3
  -1   5   3 1390.81   45.61   1
  -1   5   3 1437.77   39.67   4
   0  -5  -3 1367.39   38.17   4
   0  -5  -3 1328.60   38.02   3
   0  -5  -3 1355.40   46.35   1
   0   5   3 1403.63   40.18   1
   0   5   3 1373.13   38.10   4
  -1  -5  -3 28.4341  3.7671   1
  -1  -5  -3 21.2935  3.4595   3
  -1  -5  -3 22.6993  4.0703   4
   1   5   3 21.3655  3.6903   4
   1   5   3 21.9476  3.9606   1
   1   5   3 22.1066  3.6135   2
  -2  -5  -3 3.68073 4.15509   4
  -2  -5  -3 4.17959 2.54167   1
   2   5   3 1.55335 3.87647   4
   2   5   3 -5.8892  3.7863   2
   2   5   3 1.16423 3.87836   1
  -3  -5  -3 86.6177  5.8581   1
  -3  -5  -3 84.9912  6.0423   4
  -3  -5  -3 86.8965  5.7006   1
   3   5   3 86.6522  6.0754   4
  -4  -5  -3 1.42526 4.01235   4
  -4  -5  -3 11.4103  3.6218   1
   4   5   3 3.29672 3.38078   4
  -5  -5  -3 12.1579  4.0009   1
  -7   6   3 -0.0519  4.5472   1
  -7   6   3 1.42484 4.66737   3
  -6   6   3 20.4957  5.2237   1
  -5   6   3 182.858   9.494   1
  -5   6   3 191.296   9.946   3
  -5   6   3 170.096   7.752   4
  -4   6   3 78.8372  6.6620   1
  -4   6   3 64.7587  4.9970   4
  -4   6   3 78.2418  6.5358   3
   3  -6  -3 25.5005  5.0376   1
   3  -6  -3 26.8384  3.4877   3
  -3   6   3 26.1425  5.4743   1
  -3   6   3 34.4583  4.0059   4
  -3   6   3 25.9992  4.6331   3
   2  -6  -3 788.492  23.750   3
   2  -6  -3 729.085  33.259   1
  -2   6   3 797.969  24.081   3
  -2   6   3 751.544  23.873   4
  -2   6   3 757.862  26.061   1
   1  -6  -3 1367.30   42.38   1
   1  -6  -3 1408.25   40.23   3
  -1   6   3 1463.07   43.06   1
  -1   6   3 1496.02   40.95   3
  -1   6   3 1466.48   40.59   4
   0  -6  -3 38.3601  4.4244   1
   0  -6  -3 39.4353  5.1185   4
   0  -6  -3 33.2129  3.3137   3
   0   6   3 32.7048  3.8257   4
   0   6   3 21.7246  4.5636   1
  -1  -6  -3 327.370  11.881   3
  -1  -6  -3 299.237  11.958   4
  -1  -6  -3 313.234  12.502   1
   1   6   3 311.689  12.819   1
   1   6   3 312.666  12.324   2
   1   6   3 332.956  12.512   4
  -2  -6  -3 2.34264 3.04808   4
   2   6   3 -0.5893  4.2170   1
  -3  -6  -3 48.8752  5.6662   1
  -3  -6  -3 36.6430  5.4514   4
  -4  -6  -3 55.8241  6.0857   1
  -5  -6  -3 76.4073  6.5813   1
  -6   7   3 27.0423  6.2388   3
  -6   7   3 40.5722  6.5059   1
  -5   7   3 40.4364  6.7339   3
  -5   7   3 48.9535  6.4862   1
  -4   7   3 2.19089 5.03740   1
  -4   7   3 -10.111   5.309   3
  -3   7   3 116.958   8.056   3
  -3   7   3 116.004   7.860   1
   2  -7  -3 16.4204  3.9509   3
  -2   7   3 18.8618  4.8410   3
  -2   7   3 12.7034  5.7614   1
   1  -7  -3 428.493  14.688   3
  -1   7   3 403.982  16.276   1
   0  -7  -3 148.890   8.621   4
   0  -7  -3 151.414   7.813   3
   0   7   3 164.749   8.777   1
  -1  -7  -3 24.5095  5.2016   4
   1   7   3 1.79137 4.66878   1
  -2  -7  -3 128.093   8.648   4
   2   7   3 143.267   8.263   1
  -3  -7  -3 89.0778  6.7815   1
  -3  -7  -3 95.7644  7.9826   4
  -4  -7  -3 51.8562  6.6645   1
  -6   8   3 4.01951 5.84672   1
  -6   8   3 8.50408 6.43160   3
  -5   8   3 0.19948 4.97313   1
  -5   8   3 -0.6878  5.8779   3
  -4   8   3 -1.7620  4.0343   3
  -4   8   3 6.92959 4.04571   1
  -3   8   3 4.96828 5.38213   1
  -3   8   3 0.05814 3.58866   3
  -2   8   3 23.1862  5.9647   1
  -2   8   3 31.2572  5.0861   3
  -1   8   3 158.506  10.031   1
   0  -8  -3 175.980  10.334   4
   0   8   3 178.996  10.504   1
  -1  -8  -3 324.773  14.616   4
   1   8   3 349.106  15.267   1
  -2  -8  -3 0.54083 5.42669   4
   2   8   3 8.22754 4.22625   1
  -3  -8  -3 73.8067  7.7930   1
  -5   9   3 -8.6053  4.4030   3
  -5   9   3 5.88227 6.02240   1
  -4   9   3 26.9134  5.8581   3
  -3   9   3 18.5669  5.5041   3
  -3   9   3 -3.1233  4.3861   1
  -2   9   3 1.51453 3.95089   3
  -2   9   3 6.17589 4.75683   1
  -1   9   3 -0.7709  5.7415   1
   0   9   3 9.75261 6.11348   1
   1   9   3 38.0557  7.1796   1
  -4  10   3 -1.2322  6.0428   1
  -4  10   3 -1.1714  5.5942   3
  -3  10   3 5.17677 5.58309   3
  -3  10   3 4.88581 5.78339   1
  -2  10   3 -0.2622  5.9668   1
  -1  10   3 115.253   9.037   1
   0  10   3 8.98154 6.01019   1
  -1 -10   4 71.1906  7.5032   4
   1 -10   4 13.5260  5.2811   4
  -2  10  -4 -2.1817  4.6494   1
  -3  10  -4 25.2211  5.4217   1
  -4  10  -4 18.5813  6.8156   1
   3   9  -4 76.9375  7.3425   1
  -3  -9   4 91.2682  7.8062   4
   1   9  -4 0.82128 5.39720   1
  -1  -9   4 8.03217 4.97384   4
   2  -9   4 25.8043  4.8276   4
  -3   9  -4 10.4917  6.0549   1
  -3   9  -4 1.39173 3.55410   3
  -4   9  -4 1.12353 6.46363   1
  -5   9  -4 38.4830  7.8449   1
  -5   9  -4 37.6379  5.6005   3
   3   8  -4 5.88805 3.43099   1
  -3  -8   4 8.03829 4.39521   4
   2   8  -4 52.9024  6.1529   1
   1   8  -4 152.962   8.406   1
  -1  -8   4 152.843   8.871   4
  -1  -8   4 132.229   6.439   3
   0  -8   4 66.3904  4.0924   3
   1  -8   4 65.5693  6.8126   4
   1  -8   4 70.2374  4.1215   3
  -2   8  -4 389.150  15.854   1
  -2   8  -4 392.280  13.022   3
   2  -8   4 416.494  15.412   4
   2  -8   4 346.010  12.489   3
  -3   8  -4 21.5074  4.0735   3
  -3   8  -4 21.0672  5.1617   1
   3  -8   4 20.5332  3.1350   3
  -4   8  -4 42.9967  5.9366   1
  -4   8  -4 31.9633  4.8591   3
   4  -8   4 48.0371  5.5644   4
  -5   8  -4 3.96680 4.21115   3
  -5   8  -4 3.23160 5.85034   1
  -6   8  -4 4.94687 5.02039   3
  -6   8  -4 15.3273  6.6725   1
  -5  -7   4 19.5907  5.9994   4
  -4  -7   4 25.6167  5.6827   4
   3   7  -4 -0.9410  3.6074   1
  -3  -7   4 3.69563 3.49545   4
   2   7  -4 5.31068 4.26119   1
  -2  -7   4 -5.7400  3.9217   4
  -2  -7   4 -3.5775  3.2856   1
   1   7  -4 120.150   7.170   1
  -1  -7   4 114.942   6.525   1
  -1  -7   4 121.894   5.584   3
  -1  -7   4 119.557   8.013   4
   0   7  -4 735.645  23.536   1
   0  -7   4 681.400  23.277   1
   0  -7   4 722.562  23.143   4
   0  -7   4 710.230  20.549   3
  -1   7  -4 1119.01   34.26   1
   1  -7   4 1079.12   32.50   4
   1  -7   4 1081.74   30.28   3
  -2   7  -4 149.661   8.986   1
  -2   7  -4 126.694   6.853   4
  -2   7  -4 136.260   6.207   3
   2  -7   4 139.888   8.070   4
   2  -7   4 140.046   5.930   3
  -3   7  -4 79.3383  5.0906   4
  -3   7  -4 78.0089  7.2357   1
  -3   7  -4 83.1828  5.3153   3
   3  -7   4 83.0390  6.0922   4
  -4   7  -4 5.62002 3.54487   3
  -4   7  -4 4.26516 4.79054   1
  -4   7  -4 1.46379 2.52182   4
   4  -7   4 3.81811 3.63250   4
  -5   7  -4 0.55065 4.63252   1
  -5   7  -4 5.89968 3.76492   3
  -6   7  -4 1.14816 4.45320   3
  -6   7  -4 2.30211 4.22796   1
  -5  -6   4 5.05072 4.73285   4
  -4  -6   4 4.11343 4.35547   4
   3   6  -4 13.8009  3.4066   1
  -3  -6   4 18.1170  2.9192   1
  -3  -6   4 20.2359  4.9165   4
   2   6  -4 321.313  12.038   1
  -2  -6   4 326.138  11.860   1
  -2  -6   4 322.181  12.999   4
   1   6  -4 31.7416  4.5351   2
   1   6  -4 23.3800  4.3426   4
   1   6  -4 18.6227  4.9359   1
  -1  -6   4 22.9781  7.6826   1
  -1  -6   4 22.0984  2.8403   3
  -1  -6   4 22.7619  5.6043   4
   0   6  -4 243.052  10.095   2
   0   6  -4 239.824  10.131   4
   0   6  -4 246.991  10.521   1
   0  -6   4 251.268  10.561   4
   0  -6   4 251.770   8.147   3
   0  -6   4 239.699  10.060   1
  -1   6  -4 968.481  30.102   1
  -1   6  -4 971.366  28.237   4
   1  -6   4 969.042  29.988   1
   1  -6   4 979.871  26.741   3
   1  -6   4 967.565  28.469   4
  -2   6  -4 536.044  18.943   1
  -2   6  -4 529.966  16.075   3
  -2   6  -4 533.489  17.110   4
   2  -6   4 540.527  18.877   1
   2  -6   4 533.028  17.367   4
   2  -6   4 555.847  16.033   3
  -3   6  -4 13.8070  3.0008   3
  -3   6  -4 17.8820  3.1443   4
  -3   6  -4 6.46779 4.66642   1
   3  -6   4 9.68864 3.48808   4
  -4   6  -4 10.4947  3.3638   3
  -4   6  -4 15.1687  2.6170   4
  -4   6  -4 13.7847  4.8361   1
   4  -6   4 11.6752  2.7013   4
  -5   6  -4 -2.0288  4.0208   3
  -5   6  -4 7.33743 4.47620   1
  -6   6  -4 -0.7793  4.1214   3
  -6   6  -4 1.59959 5.02147   1
  -7   6  -4 -2.3276  5.9306   1
  -7   6  -4 -7.9570  6.0290   3
  -6  -5   4 17.0583  6.3087   2
  -5  -5   4 -0.7681  4.8978   2
  -5  -5   4 -6.5715  4.1661   4
  -4  -5   4 27.5937  4.4772   2
  -4  -5   4 26.9628  2.4687   1
  -4  -5   4 20.7772  2.4714   1
  -4  -5   4 31.2517  4.7754   4
   3   5  -4 24.0591 13.6784   1
   3   5  -4  5.2208 15.3647   4
   2   5  -4 283.983  10.138   1
   2   5  -4 284.291  11.129   2
   2   5  -4 276.261  10.934   4
  -2  -5   4 269.183   9.827   1
  -2  -5   4 278.238  11.025   4
   1   5  -4 1222.43   34.44   4
   1   5  -4 1225.37   34.78   2
   1   5  -4 1207.44   35.17   1
  -1  -5   4 1178.69   32.96   3
  -1  -5   4 1194.41   34.46   4
  -1  -5   4 1267.79   35.23   1
   0   5  -4 1421.67   39.37   4
   0   5  -4 1436.21   39.89   2
   0   5  -4 1465.11   41.22   1
   0  -5   4 1422.64   37.97   3
   0  -5   4 1445.77   41.08   1
   0  -5   4 1389.48   39.39   4
  -1   5  -4 42.6428  3.8173   4
  -1   5  -4 40.2903  4.5176   1
  -1   5  -4 43.9940  2.6630   3
   1  -5   4 42.9536  4.1241   1
   1  -5   4 41.7217  2.3812   3
   1  -5   4 39.6172  4.1666   4
  -2   5  -4 292.331  10.024   4
  -2   5  -4 287.253   9.385   3
  -2   5  -4 273.268  13.717   1
   2  -5   4 302.592   9.405   3
   2  -5   4 282.114  11.151   1
   2  -5   4 292.594  10.471   4
  -3   5  -4 412.723  13.104   3
  -3   5  -4 404.936  12.747   4
  -3   5  -4 371.825  14.567   1
   3  -5   4 409.638  12.936   4
   3  -5   4 412.474  15.002   1
  -4   5  -4 109.990   7.408   1
  -4   5  -4 107.724   4.791   4
  -4   5  -4 112.413   6.238   3
   4  -5   4 108.907   5.051   4
  -5   5  -4 11.5895  4.3975   1
  -5   5  -4 9.46242 3.76711   3
  -6   5  -4 46.8196  5.8544   1
  -6   5  -4 51.5276  6.0930   3
  -7   5  -4 19.8153  6.1861   3
  -6  -4   4 17.6463  4.6467   2
  -5  -4   4 119.146   7.788   2
  -5  -4   4 129.270   6.993   4
   4   4  -4 619.186  19.814   4
  -4  -4   4 644.693  19.836   4
  -4  -4   4 615.598  18.160   1
  -4  -4   4 636.121  21.577   2
  -4  -4   4 608.772  18.148   1
   3   4  -4 207.160   8.910   2
   3   4  -4 197.439   7.189   1
   3   4  -4 206.754   8.755   4
  -3  -4   4 207.031   8.489   4
  -3  -4   4 190.620   6.941   1
  -3  -4   4 209.334   9.679   2
   2   4  -4 232.802   9.065   4
   2   4  -4 231.365   8.074   1
   2   4  -4 231.908   9.038   2
  -2  -4   4 228.508   7.899   1
  -2  -4   4 219.521   9.128   4
  -2  -4   4 225.363   9.533   2
   1   4  -4 1103.86   34.99   4
   1   4  -4 1078.52   30.61   2
   1   4  -4 1087.60   30.91   1
  -1  -4   4 1055.14   30.22   4
  -1  -4   4 1065.44   30.78   1
   0   4  -4 590.174  17.395   2
   0   4  -4 584.772  17.381   4
   0   4  -4 564.412  17.904   1
   0  -4   4 578.338  17.824   1
   0  -4   4 578.991  15.761   3
   0  -4   4 574.049  17.440   4
  -1   4  -4 1243.70   33.24   4
  -1   4  -4 1218.65   35.25   1
  -1   4  -4 1201.29   32.27   3
   1  -4   4 1221.80   35.25   1
   1  -4   4 1194.54   33.19   4
   1  -4   4 1236.70   32.26   3
  -2   4  -4 530.567  15.326   4
  -2   4  -4 487.069  17.956   1
  -2   4  -4 520.492  15.069   3
   2  -4   4 528.887  17.159   1
   2  -4   4 539.288  15.527   4
  -3   4  -4 2.34948 1.61408   4
  -3   4  -4 -0.9807  3.2448   1
  -3   4  -4 3.39613 3.06717   3
   3  -4   4 5.01363 6.89024   1
   3  -4   4 2.07373 2.30084   4
  -4   4  -4 448.323  12.746   4
  -4   4  -4 460.826  16.483   1
  -4   4  -4 439.823  15.127   3
   4  -4   4 437.267  12.781   4
   4  -4   4 455.433  16.224   1
  -5   4  -4 19.9027  4.5592   3
  -5   4  -4 14.2868  3.6966   1
  -6   4  -4 12.5335  4.1548   1
  -6   4  -4 -2.8872  4.5533   3
  -7   4  -4 26.6861  6.4641   3
  -7   4  -4 27.1679  5.9857   1
  -7  -3   4 42.5392  7.5503   3
  -7  -3   4 50.3453  7.6078   2
  -6  -3   4 0.74190 4.99772   2
  -6  -3   4 -0.9848  2.9736   4
  -5  -3   4 0.93225 4.45861   2
  -5  -3   4 -3.8524  3.1461   4
  -4  -3   4 134.288   6.382   4
  -4  -3   4 110.435   7.343   2
   3   3  -4 116.242   5.562   4
  -3  -3   4 109.640   4.051   1
  -3  -3   4 110.091   4.180   1
  -3  -3   4 124.073   6.881   2
  -3  -3   4 116.492   6.066   4
   2   3  -4 42.9642  3.6201   4
   2   3  -4 42.2090  2.4493   1
   2   3  -4 41.3887  3.6681   2
  -2  -3   4 42.3677  2.3254   1
  -2  -3   4 46.2560  3.8625   4
  -2  -3   4 42.4694  3.9939   2
   1   3  -4 4811.77  123.93   1
   1   3  -4 4558.61  120.25   2
   1   3  -4 4575.06  118.60   4
  -1  -3   4 4685.52  125.84   1
  -1  -3   4 4517.03  119.76   4
  -1  -3   4 4562.95  120.79   2
   0   3  -4 194.662   6.694   2
   0   3  -4 192.885   6.860   4
   0   3  -4 190.183   6.971   1
   0  -3   4 194.444   5.401   3
   0  -3   4 189.587   7.107   4
   0  -3   4 192.236   6.901   1
  -1   3  -4 149.570   5.497   4
  -1   3  -4 144.851   6.201   1
  -1   3  -4 143.516   4.527   3
   1  -3   4 143.923   5.606   4
   1  -3   4 145.781   6.079   1
  -2   3  -4 197.344   6.681   3
  -2   3  -4 209.966   6.672   4
  -2   3  -4 194.805  10.935   1
   2  -3   4 187.236   7.717   1
   2  -3   4 200.742   6.677   4
  -3   3  -4 335.629  13.097   3
  -3   3  -4 354.626  17.200   1
   3  -3   4 346.875  10.027   4
   3  -3   4 345.339  12.443   1
  -4   3  -4 34.8538  5.7526   1
  -4   3  -4 32.9723  6.7939   3
   4  -3   4 41.7351  5.0474   1
  -5   3  -4 -10.323   5.034   1
  -5   3  -4 6.09257 4.62460   3
   5  -3   4 2.05639 3.08136   1
  -6   3  -4 207.445  10.356   3
  -6   3  -4 208.508  10.244   1
  -7   3  -4 15.4938  4.9566   1
  -7   3  -4 7.75019 5.84955   3
  -7  -2   4 3.77466 6.04214   3
  -7  -2   4 -4.2142  6.1558   2
  -6  -2   4 110.613   8.129   3
  -6  -2   4 116.610   8.703   2
  -6  -2   4 117.170   5.762   4
  -5  -2   4 121.733   7.845   2
  -5  -2   4 123.059   5.768   4
  -4  -2   4 1.89700 3.52409   2
  -3  -2   4 798.230  22.393   4
  -3  -2   4 776.056  23.470   2
   2   2  -4 2206.20   57.38   4
   2   2  -4 2214.10   57.97   1
   2   2  -4 2182.17   57.97   2
  -2  -2   4 2127.68   56.77   4
  -2  -2   4 2068.39   59.85   1
  -2  -2   4 2195.89   58.05   2
   1   2  -4 220.763   7.348   2
   1   2  -4 222.470   6.765   1
   1   2  -4 206.710   7.306   4
  -1  -2   4 208.257   7.391   4
  -1  -2   4 205.894   6.631   1
  -1  -2   4 217.756   7.518   2
   0   2  -4 7483.90  197.16   4
   0   2  -4 7668.38  205.86   1
   0   2  -4 7650.21  195.10   2
   0  -2   4 7645.87  195.10   4
   0  -2   4 7535.26  209.29   1
  -1   2  -4 310.914   9.195   4
  -1   2  -4 306.319  26.376   1
   1  -2   4 301.901  10.068   1
   1  -2   4 317.188   9.306   4
  -2   2  -4 3787.60  102.47   1
   2  -2   4 3677.77   95.91   4
   2  -2   4 3780.74  103.55   1
  -3   2  -4 604.050  19.117   1
   3  -2   4 608.872  19.098   1
  -4   2  -4 1316.42   38.63   1
   4  -2   4 1317.00   38.61   1
   5  -2   4 17.1353  4.1215   1
  -6   2  -4 31.6031  4.8358   3
  -6   2  -4 30.9013  4.4377   1
  -7   2  -4 6.32165 4.27409   2
  -7   2  -4 -16.637   6.144   3
  -7   2  -4 -0.3942  4.3069   1
  -7  -1   4 26.2782  6.3308   2
  -7  -1   4 23.8674  6.0356   3
  -6  -1   4 57.3078  6.8809   2
  -6  -1   4 62.8709  3.9588   4
  -6  -1   4 69.8667  7.3333   3
  -5  -1   4 16.5643  4.5155   3
  -5  -1   4 20.2463  2.5236   4
  -5  -1   4 15.8710  4.3119   2
  -4  -1   4 81.0869  5.4388   3
  -4  -1   4 63.9073  4.7797   2
  -4  -1   4 65.8387  3.7982   4
  -3  -1   4 169.644   6.507   4
  -3  -1   4 189.875   7.500   2
  -3  -1   4 173.858   7.393   3
  -2  -1   4 104.913   4.507   4
  -2  -1   4 106.246   4.743   2
  -2  -1   4 105.133   4.553   3
   1   1  -4 414.323  11.250   1
  -1  -1   4 377.798  11.151   1
  -1  -1   4 391.919  11.686   4
  -1  -1   4 396.398  11.746   2
  -1  -1   4 406.676  11.249   3
   0  -1   4 5852.20  169.01   1
  -1   1  -4 5054.32  133.79   1
   1  -1   4 4916.12  136.11   1
  -2   1  -4 2408.92   69.73   1
   2  -1   4 2436.26   67.37   1
   2  -1   4 2462.76   63.56   4
  -3   1  -4 40.5010  4.0317   1
   3  -1   4 38.7504  3.1877   1
  -4   1  -4 418.688  14.676   1
   4  -1   4 416.083  14.544   1
  -5   1  -4 149.469   7.500   2
  -5   1  -4 159.607   8.282   1
   5  -1   4 157.655   8.035   1
  -6   1  -4 11.5900  4.0936   1
  -6   1  -4 13.4144  3.1873   2
   6  -1   4 14.2699  4.6040   1
  -7   1  -4 2.08231 3.98650   1
  -7   1  -4 -6.9895  4.3245   2
  -7   1  -4 7.83713 5.97408   3
  -7   0   4 -0.0012  3.9410   2
  -7   0   4 -9.8242  4.4548   3
  -6   0   4 104.460   4.125   1
  -6   0   4 105.185   4.642   4
  -6   0   4 112.609   7.445   3
  -6   0   4 98.6367  7.1165   2
   5   0  -4 32.2836  2.0009   1
  -5   0   4 27.0527  4.8276   3
  -5   0   4 33.0668  2.6434   4
  -5   0   4 33.4687  1.9966   1
   4   0  -4 14.7136  1.3435   1
  -4   0   4 20.3678  3.0867   3
  -4   0   4 22.1556  2.2802   4
  -4   0   4 20.6574  1.4093   1
   3   0  -4 570.964  16.767   1
  -3   0   4 639.624  16.874   1
  -3   0   4 624.186  18.388   3
   2   0  -4 3205.77   94.78   1
  -2   0   4 3543.33   91.24   3
  -2   0   4 3731.18   96.33   1
   1   0  -4 50.4428  2.1637   1
   1   0  -4 50.5704  2.1056   1
   1   0  -4 48.6920  2.5570   3
  -1   0   4 50.0503  2.4430   3
  -1   0  -4 3685.97  109.40   1
  -1   0  -4 3990.06  100.34   2
   1   0   4 3974.83  104.53   1
  -2   0  -4 3732.61  101.41   1
  -2   0  -4 3727.34   96.81   2
   2   0   4 3771.20  101.33   1
  -3   0  -4 315.474  10.901   1
  -3   0  -4 291.992   9.733   2
   3   0   4 294.611   8.327   4
   3   0   4 302.482  10.664   1
  -4   0  -4 339.380  11.832   2
  -4   0  -4 344.659  12.638   1
   4   0   4 348.907  12.428   1
  -5   0  -4 175.711   8.993   1
  -5   0  -4 181.071   8.641   2
   5   0   4 185.411   8.522   1
  -6   0  -4 21.9804  4.2452   1
  -6   0  -4 27.6390  4.5501   2
   6   0   4 21.5758  4.4797   1
  -7   0  -4 5.36778 3.43211   2
  -7   0  -4 6.53971 3.56773   1
  -7   1   4 -0.2038  4.2115   3
  -7   1   4 0.71425 5.40193   2
   6  -1  -4 7.86878 2.14007   1
  -6   1   4 5.37543 5.28796   3
  -6   1   4 2.33060 1.91888   1
  -6   1   4 2.93002 1.50838   4
   5  -1  -4 12.6625  2.1155   1
  -5   1   4 13.6292  2.2260   1
  -5   1   4 13.5395  2.0306   4
  -5   1   4 18.0395  4.4034   3
   4  -1  -4 85.6128  3.8110   1
  -4   1   4 84.7284  5.6937   3
  -4   1   4 85.4035  3.8310   1
   3  -1  -4 1362.53   38.01   1
  -3   1   4 1469.03   38.16   1
  -3   1   4 1325.60   38.25   3
   2  -1  -4 31.2386  1.9605   1
   2  -1  -4 34.6769  2.8245   3
  -2   1   4 31.6628  1.9869   1
  -2   1   4 29.9756  2.9849   3
   1  -1  -4 7663.25  199.43   3
   1  -1  -4 7771.97  210.82   1
  -1   1   4 7166.23  199.34   3
  -1   1   4 8392.37  211.63   1
   0  -1  -4 9687.49  268.11   1
   0  -1  -4 8690.12  239.00   3
   0  -1  -4 9999.99  297.18   1
   0   1   4 8900.77  239.07   3
  -1  -1  -4 100.509   4.684   1
   1   1   4 98.1705  4.5320   1
   1   1   4 102.434   4.186   2
  -2  -1  -4 1860.88   50.55   1
  -2  -1  -4 1771.63   47.97   2
   2   1   4 1777.69   47.06   4
   2   1   4 1863.26   48.09   2
   2   1   4 1803.17   50.42   1
  -3  -1  -4 1007.13   28.60   2
  -3  -1  -4 1035.34   30.09   1
   3   1   4 1005.12   27.18   4
   3   1   4 1046.36   30.10   1
  -4  -1  -4 301.273  11.550   1
  -4  -1  -4 324.079  11.278   2
   4   1   4 300.029   9.160   4
   4   1   4 324.978  11.670   1
  -5  -1  -4 6.21824 3.91658   2
  -5  -1  -4 8.16600 3.92139   1
   5   1   4 4.29319 3.68929   1
  -6  -1  -4 27.2843  3.8980   1
  -6  -1  -4 29.4028  4.8131   2
  -7   2   4 -0.8653  5.5359   3
   6  -2  -4 17.5081  3.0061   1
  -6   2   4 17.3632  1.9329   4
  -6   2   4 16.0459  2.8244   1
  -6   2   4 16.7539  4.3469   3
   5  -2  -4 11.9003  3.3011   1
  -5   2   4 4.93217 5.97274   3
   4  -2  -4 19.9641  2.6517   1
  -4   2   4 22.0005  2.6930   1
  -4   2   4 16.8030  4.4722   3
   3  -2  -4 361.462  12.004   3
   3  -2  -4 341.534  11.204   1
  -3   2   4 344.674  11.318   1
  -3   2   4 348.650  12.048   3
   2  -2  -4 1705.94   45.74   3
   2  -2  -4 1681.34   46.79   1
  -2   2   4 1683.44   45.77   3
  -2   2   4 1723.03   46.93   1
   1  -2  -4 3053.59   81.90   1
   1  -2  -4 2942.69   79.12   3
  -1   2   4 3069.63   81.98   1
  -1   2   4 3028.49   79.29   3
   0  -2  -4 1044.39   27.68   3
   0  -2  -4 1028.50   28.60   1
   0   2   4 952.588  28.593   1
   0   2   4 997.205  27.604   3
  -1  -2  -4 1612.05   44.93   1
  -1  -2  -4 1634.12   44.86   1
   1   2   4 1588.54   42.31   4
   1   2   4 1584.09   42.66   2
  -2  -2  -4 2252.08   63.11   1
  -2  -2  -4 2329.19   63.20   1
   2   2   4 2218.16   60.42   2
   2   2   4 2334.45   59.61   4
  -3  -2  -4 -1.4144  3.2972   2
   3   2   4 4.13657 3.32246   2
   3   2   4 -1.5305  2.0570   4
  -4  -2  -4 26.9989  3.3671   1
  -4  -2  -4 17.5461  3.2715   1
  -4  -2  -4 22.4317  3.8667   2
   4   2   4 19.7192  2.5726   4
  -5  -2  -4 9.70974 2.88480   1
  -5  -2  -4 11.4585  4.1429   2
  -5  -2  -4 6.56967 2.86642   1
  -6  -2  -4 28.4117  4.2175   2
  -6  -2  -4 28.0745  4.2219   1
  -7  -2  -4 1.99557 4.29687   2
  -7   3   4 23.8565  6.3359   3
  -6   3   4 35.4991  3.8530   1
  -6   3   4 38.4893  6.2507   3
   5  -3  -4 1.06346 2.64175   1
  -5   3   4 2.40216 1.89637   4
  -5   3   4 2.68558 2.98884   1
  -5   3   4 -2.5766  5.0877   3
   4  -3  -4 29.3779  4.3977   3
   4  -3  -4 31.3469  3.6704   1
  -4   3   4 33.2887  3.5973   1
  -4   3   4 30.4976  5.1691   3
  -4   3   4 30.3877  2.8018   4
   3  -3  -4 4.93030 3.89282   3
   3  -3  -4 -1.9903  4.1091   1
  -3   3   4 -1.5006  4.1991   3
   2  -3  -4 218.093   8.074   3
   2  -3  -4 213.600   8.064   1
  -2   3   4 207.170   8.199   3
  -2   3   4 195.100   7.859   1
  -2   3   4 202.057   7.527   4
   1  -3  -4 4064.25  107.33   1
   1  -3  -4 3834.06  101.84   3
  -1   3   4 3664.88  105.53   1
  -1   3   4 4053.68  100.50   4
  -1   3   4 3867.09  102.03   3
   0  -3  -4 1391.10   56.12   1
   0  -3  -4 1490.34   39.85   3
   0   3   4 1452.03   41.49   1
   0   3   4 1511.75   47.66   4
  -1  -3  -4 3.15088 4.54631   3
  -1  -3  -4  0.4448 12.0438   1
   1   3   4  7.1877 30.8816   1
   1   3   4  6.8449 26.4840   4
   1   3   4  2.8197 15.5697   2
  -2  -3  -4 1559.04   44.59   1
  -2  -3  -4 1548.11   44.63   1
   2   3   4 1574.47   42.13   4
   2   3   4 1573.21   42.77   2
  -3  -3  -4 2697.55   73.99   1
  -3  -3  -4 2576.46   73.69   1
   3   3   4 2693.15   69.80   4
   3   3   4 2652.17   71.26   2
  -4  -3  -4 237.144   9.947   1
  -4  -3  -4 250.857  10.375   1
  -4  -3  -4 239.327  10.412   2
   4   3   4 240.277   9.085   4
  -5  -3  -4 161.375   8.165   1
  -5  -3  -4 132.654   7.495   1
  -5  -3  -4 142.078   8.444   2
  -6  -3  -4 5.23636 3.16121   1
  -6  -3  -4 0.49260 4.65350   2
  -7   4   4 8.10204 6.07733   3
  -7   4   4 3.84448 3.21784   1
   6  -4  -4 2.76975 3.37706   1
  -6   4   4 12.3241  5.5439   3
  -6   4   4 4.62122 3.28657   1
   5  -4  -4 69.3060  5.2775   1
  -5   4   4 64.8716  5.5825   3
  -5   4   4 60.9070  5.1550   1
  -5   4   4 57.0675  3.8089   4
   4  -4  -4 147.960   7.365   3
   4  -4  -4 150.431   7.476   1
  -4   4   4 154.838   7.594   1
  -4   4   4 156.912   8.380   3
  -4   4   4 153.566   6.498   4
   3  -4  -4 238.443   9.330   3
   3  -4  -4 221.468   9.229   1
  -3   4   4 238.700   9.596   1
  -3   4   4 225.716   9.495   3
  -3   4   4 216.294   8.162   4
   2  -4  -4 659.156  20.726   1
   2  -4  -4 665.281  19.891   3
  -2   4   4 662.825  20.221   3
  -2   4   4 656.408  19.506   4
  -2   4   4 660.195  20.892   1
   1  -4  -4 1648.79   50.29   1
   1  -4  -4 1682.38   45.51   3
  -1   4   4 1662.01   45.76   3
  -1   4   4 1689.72   47.61   1
  -1   4   4 1662.92   44.94   4
   0  -4  -4 604.362  18.250   3
   0  -4  -4 614.260  27.200   1
   0   4   4 567.700  19.172   1
   0   4   4 608.492  18.271   4
  -1  -4  -4 133.032   6.097   3
  -1  -4  -4 125.025   6.299   1
   1   4   4 130.672   6.057   4
   1   4   4 129.713   6.073   2
   1   4   4 133.571   8.708   1
  -2  -4  -4 160.722   7.678   1
  -2  -4  -4 155.775   8.037   1
   2   4   4 166.454   7.178   4
   2   4   4 165.255   7.218   2
  -3  -4  -4 332.777  12.363   1
  -3  -4  -4 334.353  12.624   1
   3   4   4 334.617  12.532   2
   3   4   4 324.569  12.018   4
  -4  -4  -4 43.9425  4.9607   1
  -4  -4  -4 40.1161  4.5010   1
   4   4   4 37.3519  4.3589   4
  -5  -4  -4 -4.4745  3.4238   1
  -7   5   4 3.26073 3.30539   1
  -6   5   4 50.8539  5.6493   1
  -6   5   4 46.4217  6.8134   3
   5  -5  -4 1.23453 3.98684   1
  -5   5   4 0.81464 3.66686   1
  -5   5   4 2.79822 4.61792   3
   4  -5  -4 323.777  12.788   1
  -4   5   4 345.530  13.412   3
  -4   5   4 318.058  11.528   4
  -4   5   4 348.520  13.384   1
   3  -5  -4 223.911   9.154   3
   3  -5  -4 231.423  10.026   1
  -3   5   4 243.606  10.382   1
  -3   5   4 224.508   9.989   3
  -3   5   4 208.944   8.532   4
   2  -5  -4 898.549  27.518   1
   2  -5  -4 883.527  25.997   3
  -2   5   4 907.013  27.698   1
  -2   5   4 867.958  25.722   4
  -2   5   4 852.972  26.254   3
   1  -5  -4 1532.78   51.28   1
   1  -5  -4 1634.97   44.07   3
  -1   5   4 1658.18   44.55   3
  -1   5   4 1498.31   46.29   1
  -1   5   4 1615.76   43.77   4
   0  -5  -4 41.0727  4.3042   3
   0  -5  -4 35.6310  9.5618   1
   0   5   4 42.3666  4.4020   4
   0   5   4 38.3023 12.2316   1
  -1  -5  -4 12.4129  3.3360   3
  -1  -5  -4 9.75654 3.26572   1
  -1  -5  -4 8.64969 2.79557   4
   1   5   4 9.19692 3.68767   1
   1   5   4 13.9177  3.5500   2
   1   5   4 8.56270 3.41364   4
  -2  -5  -4 237.095   9.975   1
  -2  -5  -4 214.915   9.323   4
  -2  -5  -4 234.320   9.777   3
   2   5   4 221.668   9.228   4
   2   5   4 221.684   9.611   2
   2   5   4 218.993  10.213   1
  -3  -5  -4 0.32275 2.59877   1
  -3  -5  -4 5.04904 3.71338   1
   3   5   4 4.19733 3.55333   4
  -4  -5  -4 109.063   7.385   1
   4   5   4 113.701   7.134   4
  -5  -5  -4 56.5079  5.2623   1
  -7   6   4 6.44815 4.55937   1
  -7   6   4 -2.4544  6.1786   3
  -6   6   4 24.2684  5.3924   1
  -6   6   4 21.5205  5.5162   3
  -5   6   4 41.1338  6.0268   3
  -5   6   4 31.1868  3.7010   4
  -5   6   4 39.8189  5.2233   1
  -4   6   4 10.0154  4.2295   1
  -4   6   4 22.6011  5.3635   3
  -4   6   4 9.20057 3.20232   4
   3  -6  -4 39.8369  4.2000   3
  -3   6   4 32.4616  4.5088   4
  -3   6   4 38.6126  5.9652   1
  -3   6   4 40.3640  4.8226   3
   2  -6  -4 3422.60   99.56   1
   2  -6  -4 3444.44   92.29   3
  -2   6   4 3375.29   91.87   4
  -2   6   4 3433.33   92.52   3
  -2   6   4 3513.76   96.43   1
   1  -6  -4 2.68081 3.84654   3
   1  -6  -4 -8.1143 29.6963   1
  -1   6   4 -4.8228 13.1467   1
  -1   6   4 4.72309 3.86237   3
  -1   6   4 -3.0316  5.8588   4
   0  -6  -4 26.6943  4.4196   1
   0  -6  -4 25.3408  3.2944   3
   0   6   4 28.2056  4.4546   4
   0   6   4 28.4304  5.1264   1
  -1  -6  -4 15.2389  3.7647   4
  -1  -6  -4 23.1535  4.1366   3
   1   6   4 27.4242  5.1238   1
   1   6   4 20.3781  3.5171   2
  -2  -6  -4 66.5107  5.3843   4
   2   6   4 72.9530  6.5573   1
  -3  -6  -4 17.6200  5.2607   1
  -4  -6  -4 53.0765  5.3480   1
  -5  -6  -4 7.33645 4.58510   1
  -6   7   4 8.21701 4.19742   1
  -6   7   4 5.44672 4.53146   3
  -5   7   4 0.82530 4.59051   3
  -5   7   4 10.2241  5.2353   1
  -4   7   4 43.3384  6.1577   1
  -4   7   4 52.4607  6.5331   3
  -3   7   4 312.249  14.273   1
  -3   7   4 357.126  14.133   3
  -2   7   4 158.434   9.638   1
  -2   7   4 177.496   9.479   3
  -1   7   4 65.2453  6.6819   1
   0   7   4 241.176  11.862   1
   1   7   4 13.3612  5.0187   1
   2   7   4 -0.0175  4.8388   1
  -3  -7  -4 142.941   8.718   1
  -4  -7  -4 42.9309  5.8457   1
  -6   8   4 74.9045  7.2344   3
  -6   8   4 75.1987  8.2548   1
  -5   8   4 10.9850  5.8313   1
  -5   8   4 12.3569  6.1520   3
  -4   8   4 1.07637 5.26227   1
  -4   8   4 -6.0551  5.3238   3
  -3   8   4 23.4794  5.8689   3
  -2   8   4 291.582  13.724   1
  -2   8   4 275.989  12.540   3
  -1   8   4 17.9697  4.9116   1
   0   8   4 22.5506  6.2768   1
   1   8   4 60.5098  6.4400   1
   2   8   4 66.9592  7.2459   1
  -3  -8  -4 -1.4101  5.7140   1
  -5   9   4 -5.4611  5.7640   1
  -5   9   4 -1.3432  5.7493   3
  -4   9   4 37.8472  6.6161   3
  -4   9   4 37.5403  6.0301   1
  -3   9   4 -7.5691  5.7894   1
  -3   9   4 -5.5621  5.5915   3
  -2   9   4 50.1654  5.6730   3
  -2   9   4 53.3054  7.0684   1
  -1   9   4 242.675  12.686   1
   0   9   4 137.113   9.609   1
   1   9   4 6.00606 6.26191   1
   2   9   4 53.0703  7.7780   1
  -3  10   4 27.1149  6.3918   3
  -3  10   4 14.4169  4.7303   1
  -2  10   4 -0.5939  5.4952   1
  -1  10   4 2.36922 6.42649   1
   0  10   4 35.8830  6.1130   1
   0  10  -5 9.70828 6.22569   1
   0 -10   5 0.62581 4.70221   4
   1 -10   5 -2.2483  4.9331   4
  -3  10  -5 31.8190  5.8183   1
  -4  10  -5 12.7998  6.9182   1
   2   9  -5 261.255  12.590   1
  -2  -9   5 250.049  12.777   4
   0  -9   5 64.8351  6.4666   4
  -1   9  -5 1.28908 4.25769   1
   1  -9   5 1.35064 3.85882   4
  -2   9  -5 17.6740  5.9504   1
  -3   9  -5 98.8394  5.7707   3
  -3   9  -5 87.9216  8.8232   1
   3  -9   5 92.4288  7.0292   4
  -4   9  -5 2.30659 3.87972   3
  -4   9  -5 -15.591   6.938   1
  -5   9  -5 -2.6193  6.6565   1
  -4  -8   5 47.4715  6.4075   4
   2   8  -5 5.20272 4.77607   1
  -1  -8   5 87.0337  4.6931   3
   0   8  -5 83.8298  6.4258   1
   0  -8   5 85.9152  4.3579   3
   0  -8   5 82.4943  6.7446   4
   1  -8   5 98.4643  4.7002   3
   1  -8   5 101.573   7.202   4
  -2   8  -5 45.7713  6.9347   1
  -2   8  -5 50.6386  4.0274   3
   2  -8   5 48.4580  3.4687   3
  -3   8  -5 28.1093  3.8896   3
  -3   8  -5 26.9751  5.8803   1
   3  -8   5 27.0669  5.5014   4
  -4   8  -5 245.334  13.101   1
  -4   8  -5 223.280   9.881   3
   4  -8   5 234.403  10.742   4
  -5   8  -5 27.1067  6.4744   1
  -5   8  -5 24.2535  4.6451   3
  -6   8  -5 -5.7465  4.2421   3
  -6   8  -5 -17.892   6.969   1
   3   7  -5 23.9043  4.0371   1
   2   7  -5 263.025  10.841   1
  -2  -7   5 241.680   9.373   3
  -2  -7   5 247.839  10.305   1
  -2  -7   5 251.760  11.912   4
   1   7  -5 44.6572  5.1923   1
  -1  -7   5 51.7978  4.8243   1
  -1  -7   5 47.3561  5.8143   4
  -1  -7   5 54.8284  3.5098   3
   0   7  -5 334.006  13.433   1
   0  -7   5 289.351  12.342   1
   0  -7   5 315.573  10.093   3
   0  -7   5 325.178  13.447   4
  -1   7  -5 537.865  19.460   1
   1  -7   5 513.898  15.332   3
   1  -7   5 516.047  18.537   4
  -2   7  -5 9.04307 2.62787   3
  -2   7  -5 6.76354 4.78728   1
  -2   7  -5 4.57992 3.56008   4
   2  -7   5 9.98882 2.01169   3
   2  -7   5 4.17575 4.69847   4
  -3   7  -5 244.583   9.194   3
  -3   7  -5 237.753  11.363   1
  -3   7  -5 243.191   9.971   4
   3  -7   5 240.223  10.186   4
  -4   7  -5 17.6139  3.4608   3
  -4   7  -5 9.94809 3.99143   1
  -4   7  -5 11.8295  2.8967   4
   4  -7   5 14.8312  4.0382   4
  -5   7  -5 4.48593 3.96822   3
  -5   7  -5 6.97201 5.47798   1
  -6   7  -5 6.60402 4.86170   3
  -6   7  -5 8.77644 5.82351   1
  -5  -6   5 27.8882  5.4414   4
  -4  -6   5 38.6035  5.5812   4
  -4  -6   5 37.7839  3.3718   1
   3   6  -5 124.795   6.336   1
  -3  -6   5 118.331   5.909   1
  -3  -6   5 137.988   8.145   4
   2   6  -5 106.728   6.325   1
  -2  -6   5 114.021   7.884   4
  -2  -6   5 94.1671  5.5951   1
   1   6  -5 973.308  28.977   2
   1   6  -5 954.284  28.572   4
   1   6  -5 922.946  29.146   1
  -1  -6   5 959.966  28.992   4
  -1  -6   5 955.685  26.630   3
  -1  -6   5 973.694  29.008   1
   0   6  -5 365.437  13.076   2
   0   6  -5 371.379  13.754   1
   0   6  -5 358.902  13.209   4
   0  -6   5 363.606  13.362   4
   0  -6   5 375.926  13.474   1
   0  -6   5 353.821  10.823   3
  -1   6  -5 45.9822  5.8826   1
  -1   6  -5 27.7368 11.4353   4
   1  -6   5 38.0809  7.8917   1
   1  -6   5 39.6690  4.8177   4
   1  -6   5 39.5086  2.4605   3
  -2   6  -5 4.53046 2.79106   4
  -2   6  -5 1.76738 5.01417   1
  -2   6  -5 7.05863 2.38102   3
   2  -6   5 12.2202  4.2390   4
   2  -6   5 12.3114 11.6038   1
  -3   6  -5 101.874   5.697   4
  -3   6  -5 107.602   5.402   3
  -3   6  -5 115.722   7.537   1
   3  -6   5 116.736   6.164   4
  -4   6  -5 -0.9295  2.0952   4
  -4   6  -5 0.73820 3.19538   1
  -4   6  -5 -4.9667  3.3365   3
   4  -6   5 3.69136 2.64789   4
  -5   6  -5 2.74793 4.58826   1
  -5   6  -5 0.98354 3.95690   3
  -6   6  -5 16.8902  5.1949   3
  -6   6  -5 20.2945  5.9200   1
  -7   6  -5 4.95543 4.79999   3
  -6  -5   5 29.0932  6.7875   2
  -6  -5   5 15.4899  4.5817   4
  -5  -5   5 77.3416  7.5575   2
  -5  -5   5 69.4342  6.2235   4
  -4  -5   5 77.5058  3.8313   1
  -4  -5   5 77.4225  3.8821   1
  -4  -5   5 85.1775  6.3194   4
  -4  -5   5 82.1691  7.2811   2
   3   5  -5 1532.64   42.84   4
   3   5  -5 1528.61   42.55   1
  -3  -5   5 1495.81   42.55   1
  -3  -5   5 1477.72   42.57   4
  -3  -5   5 1525.65   43.99   2
   2   5  -5 93.4031  5.2410   1
   2   5  -5 99.9915  6.4991   4
   2   5  -5 102.241   6.429   2
  -2  -5   5 93.4814  6.7939   4
  -2  -5   5 86.5593  4.6312   1
   1   5  -5 851.109  25.764   1
   1   5  -5 869.425  25.651   4
   1   5  -5 850.262  25.558   2
  -1  -5   5 858.448  25.620   1
  -1  -5   5 867.085  25.728   4
  -1  -5   5 862.149  23.703   3
   0   5  -5 48.4059  4.2900   2
   0   5  -5 61.6136  4.4437   1
   0   5  -5 60.5260  4.9057   4
   0  -5   5 62.7791  2.6455   3
   0  -5   5 59.8620  4.6188   1
   0  -5   5 55.4463  6.0408   4
  -1   5  -5 122.795   6.181   4
  -1   5  -5 122.694   4.360   3
  -1   5  -5 122.456   8.005   1
   1  -5   5 121.594   6.707   1
   1  -5   5 117.613   4.224   3
   1  -5   5 116.125   6.036   4
  -2   5  -5 20.5433  4.2940   1
  -2   5  -5 16.1032  2.8901   4
  -2   5  -5 19.7914  2.1864   3
   2  -5   5 20.4408  3.7733   1
   2  -5   5 18.4559  3.4399   4
  -3   5  -5 71.0481  6.4021   1
  -3   5  -5 70.5551  4.1922   4
  -3   5  -5 67.3508  4.4802   3
   3  -5   5 69.7404  5.8815   1
   3  -5   5 76.4628  4.6412   4
  -4   5  -5 96.8012  5.9182   3
  -4   5  -5 104.688   4.648   4
  -4   5  -5 107.292   7.684   1
   4  -5   5 106.843   4.945   4
  -5   5  -5 21.0666  3.6329   3
  -6   5  -5 2.10577 4.42953   3
  -6   5  -5 -1.4010  5.0582   1
  -7   5  -5 1.55184 4.87010   1
  -7   5  -5 4.36874 5.43682   3
  -6  -4   5 30.9475  4.5690   4
  -6  -4   5 42.6839  6.6218   2
  -5  -4   5 0.49181 3.71420   4
  -5  -4   5 7.08287 5.40558   2
  -4  -4   5 12.5174  1.3875   1
  -4  -4   5 13.8211  1.6975   1
  -4  -4   5 23.1020  4.4480   4
   3   4  -5 460.204  15.093   4
   3   4  -5 436.327  13.412   1
   3   4  -5 455.838  15.718   2
  -3  -4   5 439.196  13.342   1
  -3  -4   5 443.053  15.087   4
  -3  -4   5 434.939  15.583   2
   2   4  -5 649.449  19.600   4
   2   4  -5 650.038  18.989   1
   2   4  -5 629.116  19.770   2
  -2  -4   5 624.127  18.796   1
  -2  -4   5 644.269  19.776   4
  -2  -4   5 651.728  20.267   2
   1   4  -5 4794.67  124.15   2
   1   4  -5 4784.08  125.29   4
   1   4  -5 4701.28  127.76   1
  -1  -4   5 4655.58  122.55   4
  -1  -4   5 4774.44  132.78   1
   0   4  -5 595.177  18.430   1
   0   4  -5 605.337  17.907   4
   0   4  -5 590.642  17.634   2
   0  -4   5 593.863  17.997   4
   0  -4   5 609.508  18.415   1
   0  -4   5 581.846  15.852   3
  -1   4  -5 101.350   5.182   4
  -1   4  -5 110.220   5.656   1
  -1   4  -5 110.132   3.699   3
   1  -4   5 111.664   5.773   1
   1  -4   5 107.330   5.322   4
  -2   4  -5 691.700  19.395   4
  -2   4  -5 690.087  18.984   3
  -2   4  -5 673.159  21.507   1
   2  -4   5 621.004  21.009   1
   2  -4   5 708.361  19.568   4
  -3   4  -5 756.774  21.201   4
  -3   4  -5 761.374  22.102   3
  -3   4  -5 759.994  24.367   1
   3  -4   5 765.747  21.370   4
   3  -4   5 775.424  24.293   1
  -4   4  -5 283.731  11.743   1
  -4   4  -5 273.762  10.488   3
   4  -4   5 296.479  12.029   1
   4  -4   5 278.502   8.614   4
  -5   4  -5 20.8212  5.3672   1
  -6   4  -5 3.85166 4.72215   1
  -7   4  -5 68.3982  7.8241   3
  -7   4  -5 83.3036  7.8490   1
  -7  -3   5 -0.5682  5.7835   2
  -7  -3   5 5.44694 6.26192   3
  -6  -3   5 33.5967  6.2428   3
  -6  -3   5 42.2689  6.7124   2
  -6  -3   5 32.0638  3.9530   4
  -5  -3   5 288.394  12.907   2
  -5  -3   5 286.748  10.940   4
  -4  -3   5 97.5514  6.9081   2
  -4  -3   5 97.1967  5.8011   4
  -3  -3   5 153.507   7.141   4
  -3  -3   5 163.982   7.969   2
   2   3  -5 5.03221 2.06958   2
   2   3  -5 3.39900 1.39085   1
   2   3  -5 6.32042 2.13526   4
  -2  -3   5 6.53803 2.35661   2
  -2  -3   5 4.83872 3.87868   4
   1   3  -5 3301.56   87.68   1
   1   3  -5 3183.99   85.27   2
   1   3  -5 3217.59   84.33   4
  -1  -3   5 3367.00   88.65   1
  -1  -3   5 3205.13   84.66   4
  -1  -3   5 3216.39   85.45   2
   0   3  -5 31.0748  2.9627   1
   0   3  -5 34.3998  2.7292   2
   0   3  -5 34.6794  3.0221   4
   0  -3   5 34.1353  2.8251   1
   0  -3   5 35.1302  3.3425   4
  -1   3  -5 6.10553 1.97798   4
  -1   3  -5 2.12402 2.15037   1
  -1   3  -5 2.29143 0.81697   3
   1  -3   5 -0.0817  2.0593   1
   1  -3   5 3.24209 1.65904   4
  -2   3  -5 1305.07   34.51   4
  -2   3  -5 1310.00   34.89   3
  -2   3  -5 1326.48   37.60   1
   2  -3   5 1270.25   37.38   1
   2  -3   5 1292.76   34.53   4
  -3   3  -5 955.956  27.009   3
  -3   3  -5 972.716  29.065   1
   3  -3   5 958.509  25.373   4
   3  -3   5 920.456  28.586   1
  -4   3  -5 -5.0510  3.5621   3
  -4   3  -5 -0.3562  2.7667   1
   4  -3   5 2.66645 3.22643   1
  -5   3  -5 17.1584  4.6757   1
  -5   3  -5 21.9128  4.7007   3
  -6   3  -5 31.2014  6.0474   3
  -6   3  -5 24.9372  5.5585   1
  -7   3  -5 57.0426  7.4570   3
  -7   3  -5 68.3883  6.3574   2
  -7   3  -5 68.6399  6.8557   1
  -7  -2   5 8.62395 5.28700   2
  -7  -2   5 15.2790  5.9003   3
  -6  -2   5 14.8304  6.1139   3
  -6  -2   5 12.7573  3.1592   4
  -6  -2   5 23.8295  5.5658   2
  -5  -2   5 18.5584  3.1121   4
  -5  -2   5 20.7091  4.0988   2
  -4  -2   5 81.0969  4.4888   4
  -4  -2   5 87.5066  6.3590   2
  -3  -2   5 153.562   6.688   4
  -3  -2   5 156.150   7.467   2
  -2  -2   5 867.661  24.826   2
  -2  -2   5 856.781  24.230   4
   1   2  -5 2310.70   60.29   1
   1   2  -5 2250.91   58.88   2
  -1  -2   5 2216.18   58.01   3
  -1  -2   5 2235.30   58.99   2
  -1  -2   5 2148.66   58.24   4
  -1  -2   5 2234.93   60.29   1
   0   2  -5 154.682   5.115   2
   0   2  -5 142.973   5.682   1
   0  -2   5 148.259   5.569   1
   0  -2   5 155.413   5.671   4
  -1   2  -5 1655.40   45.20   1
   1  -2   5 1657.80   42.43   4
   1  -2   5 1549.18   46.98   1
  -2   2  -5 12.1916 24.9114   1
   2  -2   5 11.2893 21.0412   1
   2  -2   5 10.9190  1.7392   4
  -3   2  -5 5.76363 3.43167   1
   3  -2   5 4.74356 0.91152   4
   3  -2   5 8.23660 3.03232   1
  -4   2  -5 980.805  30.213   1
   4  -2   5 969.924  29.977   1
  -5   2  -5 3.65150 3.96448   1
   5  -2   5 7.53417 3.90603   1
  -6   2  -5 40.2170  4.7208   2
  -6   2  -5 46.7888  6.1482   3
  -6   2  -5 34.6404  5.5446   1
  -7   2  -5 -6.0610  4.6553   1
  -7   2  -5 -1.1086  4.0940   3
  -7   2  -5 5.35261 3.77301   2
  -7  -1   5 31.5998  5.1878   2
  -7  -1   5 16.1726  6.2255   3
  -6  -1   5 145.747   8.842   3
  -6  -1   5 134.948   6.056   4
  -6  -1   5 121.994   8.880   2
  -5  -1   5 3.69053 4.06771   3
  -5  -1   5 2.73889 4.07399   2
  -5  -1   5 1.05138 2.12917   4
  -4  -1   5 73.8411  4.2157   4
  -4  -1   5 74.4613  5.6940   2
  -4  -1   5 81.0098  5.4611   3
  -3  -1   5 1102.48   31.19   2
  -3  -1   5 1083.17   30.67   3
  -3  -1   5 1081.53   29.77   4
  -2  -1   5 873.497  24.736   3
  -2  -1   5 920.074  24.682   4
  -2  -1   5 890.913  25.283   2
   1   1  -5 2712.93   75.03   1
   1   1  -5 2749.53   71.71   3
  -1  -1   5 2746.09   72.15   2
  -1  -1   5 2814.02   71.77   3
  -1  -1   5 2801.36   74.18   1
   0   1  -5 2701.43   72.92   3
   0   1  -5 2736.36   77.44   1
   0  -1   5 2774.77   74.21   1
   0  -1   5 2789.55   78.65   2
  -1   1  -5 12.6890 41.4504   1
   1  -1   5 16.4018  2.8687   1
  -2   1  -5 4927.31  134.39   1
   2  -1   5 4653.75  135.63   1
  -3   1  -5 3.48874 2.75873   1
   3  -1   5 6.82745 2.62449   1
  -4   1  -5 204.932   8.977   1
  -4   1  -5 208.589   8.059   2
   4  -1   5 211.536   9.206   1
  -5   1  -5 7.12801 2.36858   2
  -5   1  -5 1.19522 3.96192   1
   5  -1   5 1.76458 3.41060   1
  -6   1  -5 25.0564  4.9057   1
  -6   1  -5 16.3151  4.1996   2
  -7   1  -5 -0.9765  4.5437   1
  -7   1  -5 -3.2583  4.3226   2
  -7   0   5 -4.4038  5.6091   3
  -7   0   5 1.62251 5.76240   2
  -6   0   5 -3.0153  5.1718   3
  -6   0   5 1.22509 2.02324   4
  -6   0   5 1.78847 5.00433   2
  -5   0   5 133.044   5.665   4
  -5   0   5 137.905   7.586   3
  -4   0   5 19.6205  2.4818   4
  -4   0   5 17.2160  2.9364   3
  -3   0   5 141.181   6.536   3
   2   0  -5 96.1692  4.6128   3
   2   0  -5 94.3642  3.2000   1
   2   0  -5 100.892   3.346   1
  -2   0   5 94.5519  4.5848   3
   1   0  -5 2732.52   71.47   3
   1   0  -5 2767.36   73.67   1
   1   0  -5 2759.03   73.84   1
  -1   0   5 2721.62   71.51   3
   0   0  -5 218.062   7.303   1
   0   0  -5 213.834   6.733   3
   0   0   5 216.927   6.699   3
   0   0   5 214.380   7.156   1
  -1   0  -5 7763.81  209.56   1
   1   0   5 7787.26  223.44   1
  -2   0  -5 422.899  15.151   1
  -2   0  -5 418.385  11.854   2
   2   0   5 412.021  13.601   1
  -3   0  -5 105.644   4.663   2
  -3   0  -5 107.306   5.447   1
   3   0   5 99.0664  3.5845   4
   3   0   5 101.543   5.245   1
  -4   0  -5 417.917  14.875   1
  -4   0  -5 434.657  13.780   2
   4   0   5 416.830  14.747   1
  -5   0  -5 166.497   8.654   1
  -5   0  -5 167.107   7.833   2
   5   0   5 170.818   8.506   1
  -6   0  -5 18.0204  4.1999   2
  -6   0  -5 15.3076  4.1618   1
  -7   0  -5 106.011   7.436   1
  -7   0  -5 100.950   7.604   2
  -7   1   5 62.5566  7.6596   2
  -7   1   5 47.9368  7.1602   3
   6  -1  -5 93.0382  4.2589   1
  -6   1   5 96.2785  4.2470   1
  -6   1   5 85.3656  7.6285   3
  -6   1   5 95.7231  4.4655   4
   5  -1  -5 128.646   5.093   1
  -5   1   5 126.762   5.087   1
  -5   1   5 131.423   5.476   4
  -5   1   5 132.909   8.184   3
   4  -1  -5 42.3200  2.5823   1
  -4   1   5 45.0325  2.5833   1
  -4   1   5 37.1827  4.4539   3
   3  -1  -5 1017.30   29.29   1
   3  -1  -5 1070.73   30.06   3
  -3   1   5 1056.44   29.41   1
  -3   1   5 1090.91   30.20   3
   2  -1  -5 122.396   5.317   3
   2  -1  -5 122.389   4.585   1
  -2   1   5 123.069   5.425   3
  -2   1   5 128.179   4.713   1
   1  -1  -5 663.218  19.554   3
   1  -1  -5 662.111  19.008   1
  -1   1   5 683.838  19.169   1
  -1   1   5 647.209  18.646   3
   0  -1  -5 219.532   9.548   1
   0  -1  -5 224.887  11.671   3
   0  -1  -5 198.694   7.565   1
   0   1   5 217.938  14.949   3
  -1  -1  -5 4491.51  120.77   1
   1   1   5 4609.70  115.39   2
   1   1   5 4334.02  126.05   1
  -2  -1  -5 93.5967  4.8875   1
  -2  -1  -5 99.5713  4.0924   2
   2   1   5 98.2505  4.8228   1
   2   1   5 102.518   4.186   4
   2   1   5 97.0532  3.9442   2
  -3  -1  -5 277.514  10.668   1
  -3  -1  -5 284.266   9.612   2
   3   1   5 280.128   8.754   4
   3   1   5 299.174  10.768   1
  -4  -1  -5 49.1793  4.0498   2
  -4  -1  -5 47.3055  3.9420   1
   4   1   5 50.2926  4.5316   1
   4   1   5 43.2862  2.5964   4
  -5  -1  -5 222.618   9.316   2
  -5  -1  -5 228.505   9.809   1
   5   1   5 215.963  10.009   1
  -6  -1  -5 43.9834  5.4693   2
  -6  -1  -5 56.1572  5.3218   1
  -7  -1  -5 33.4475  5.5383   2
  -7   2   5 -9.4413  6.0943   3
   6  -2  -5 11.9620  2.7874   1
  -6   2   5 23.9089  6.1970   3
  -6   2   5 10.7644  2.1646   4
  -6   2   5 12.3436  2.5900   1
   5  -2  -5 979.428  28.513   1
  -5   2   5 982.629  30.167   3
  -5   2   5 976.628  28.515   1
   4  -2  -5 533.433  16.713   1
  -4   2   5 554.614  16.803   1
  -4   2   5 555.062  18.161   3
   3  -2  -5 117.180   5.035   1
   3  -2  -5 114.010   5.620   3
  -3   2   5 119.711   5.019   1
  -3   2   5 113.399   6.288   3
   2  -2  -5 35.3316 14.1230   3
   2  -2  -5 40.4831  2.9703   1
  -2   2   5 46.3059  3.2334   1
  -2   2   5 45.9411  3.8491   3
   1  -2  -5 575.019  16.549   3
   1  -2  -5 527.334  16.924   1
  -1   2   5 596.362  17.247   1
  -1   2   5 565.156  16.671   3
   0  -2  -5 362.489  11.786   1
   0  -2  -5 369.520  11.316   3
   0   2   5 366.926  11.525   3
   0   2   5 349.391  11.744   1
  -1  -2  -5 293.856  10.225   1
  -1  -2  -5 283.966  10.060   1
   1   2   5 284.752   9.059   2
   1   2   5 276.995   9.286   4
  -2  -2  -5 232.492   8.874   1
  -2  -2  -5 216.040   8.882   1
   2   2   5 229.066   7.918   4
   2   2   5 232.504   9.956   2
  -3  -2  -5 981.513  29.927   1
  -3  -2  -5 1000.35   28.58   2
  -3  -2  -5 1017.94   30.16   1
   3   2   5 1013.14   27.62   4
   3   2   5 1017.72   28.69   2
  -4  -2  -5 3.47199 2.50176   1
  -4  -2  -5 3.59280 2.54744   1
  -4  -2  -5 2.20198 2.33688   2
   4   2   5 3.26525 2.05873   4
  -5  -2  -5 16.2967  3.7511   1
  -5  -2  -5 26.3797  4.5449   2
  -5  -2  -5 17.2104  3.9819   1
   5   2   5 16.0757  2.2731   4
  -6  -2  -5 29.7661  4.7308   1
  -6  -2  -5 28.9302  5.1404   2
  -7   3   5 3.11921 5.60351   3
   6  -3  -5 2.33453 2.97941   1
  -6   3   5 -3.5760  3.9230   3
  -6   3   5 -0.9124  2.6131   1
   5  -3  -5 125.024   6.368   1
  -5   3   5 114.722   7.276   3
  -5   3   5 131.745   6.369   1
   4  -3  -5 408.390  14.378   3
   4  -3  -5 410.425  13.816   1
  -4   3   5 421.700  14.028   1
  -4   3   5 412.101  14.784   3
   3  -3  -5 1743.07   49.41   1
   3  -3  -5 1777.55   48.53   3
  -3   3   5 1847.66   49.77   1
  -3   3   5 1690.70   48.44   3
   2  -3  -5 1089.89   31.24   3
   2  -3  -5 1180.61   32.30   1
  -2   3   5 1054.73   31.24   3
  -2   3   5 1133.42   32.35   1
   1  -3  -5 67.6562 12.4457   1
   1  -3  -5 66.8448  4.4545   3
  -1   3   5 56.0389  4.8452   1
  -1   3   5 65.1703  4.4467   4
  -1   3   5 50.6821  4.7820   3
   0  -3  -5 11.7316  3.1898   3
   0  -3  -5 5.35599 9.90065   1
   0   3   5 9.18270 3.00140   4
   0   3   5 16.2308  3.4938   1
  -1  -3  -5 925.223  27.467   1
  -1  -3  -5 905.014  26.426   3
   1   3   5 921.695  27.677   1
   1   3   5 941.504  26.001   4
  -2  -3  -5 315.845  11.691   1
  -2  -3  -5 314.917  11.676   1
   2   3   5 305.863  10.841   2
   2   3   5 302.996  11.924   4
  -3  -3  -5 47.4264  4.6495   1
  -3  -3  -5 36.4123  5.6834   1
   3   3   5 38.2379  4.1467   2
   3   3   5 35.5852  5.7188   4
  -4  -3  -5 241.167  10.426   1
  -4  -3  -5 226.542   9.770   1
   4   3   5 238.145   8.961   4
  -5  -3  -5 437.162  16.230   1
  -5  -3  -5 417.234  15.544   2
  -6  -3  -5 2.60777 4.39432   2
  -6  -3  -5 -2.1468  3.9963   1
  -7   4   5 4.11188 5.79206   3
  -6   4   5 3.53453 3.87717   3
  -6   4   5 2.70119 3.47253   1
   5  -4  -5 21.8868  3.6522   1
  -5   4   5 24.8882  5.5253   3
  -5   4   5 22.3556  3.8076   1
  -5   4   5 23.1655  2.6560   4
   4  -4  -5 287.871  10.868   1
   4  -4  -5 271.532  11.134   3
  -4   4   5 265.886   9.776   4
  -4   4   5 272.756  10.630   1
  -4   4   5 265.067  11.468   3
   3  -4  -5 204.010   8.561   1
   3  -4  -5 196.159   8.517   3
  -3   4   5 208.422   8.797   3
  -3   4   5 184.446   7.560   4
  -3   4   5 190.914   8.431   1
   2  -4  -5 144.711   7.068   1
   2  -4  -5 155.338   7.068   3
  -2   4   5 157.287   6.867   4
  -2   4   5 149.950   7.464   1
  -2   4   5 143.062   7.287   3
   1  -4  -5 213.122  20.392   1
   1  -4  -5 214.735   8.401   3
  -1   4   5 206.405   9.101   3
  -1   4   5 226.432   8.730   4
  -1   4   5 225.860  10.421   1
   0  -4  -5 1089.13   31.19   3
   0  -4  -5 1098.54   32.49   1
   0   4   5 1141.33   31.03   4
   0   4   5 1069.20   32.58   1
  -1  -4  -5 1015.31   31.58   1
  -1  -4  -5 1064.67   30.53   3
   1   4   5 1074.90   31.98   1
   1   4   5 1095.85   30.15   4
  -2  -4  -5 885.992  27.025   1
  -2  -4  -5 854.728  26.550   1
   2   4   5 847.708  25.387   2
   2   4   5 842.600  24.999   4
  -3  -4  -5 104.566   6.887   1
  -3  -4  -5 105.278   6.053   1
   3   4   5 105.021   5.994   4
   3   4   5 99.8068  6.3080   2
  -4  -4  -5 195.587   9.217   1
   4   4   5 188.501   8.496   4
  -5  -4  -5 -4.7384  3.8564   1
  -7   5   5 20.0217  5.1557   3
  -7   5   5 18.0085  4.8596   1
  -6   5   5 75.5155  7.3134   3
  -6   5   5 75.0191  6.4908   1
   5  -5  -5 -1.6760  2.9842   1
  -5   5   5 -3.6741  3.6052   1
  -5   5   5 0.30561 2.03569   4
  -5   5   5 5.64942 4.95974   3
   4  -5  -5 145.405   8.160   1
  -4   5   5 139.236   8.007   1
  -4   5   5 132.736   6.932   4
  -4   5   5 161.755   8.955   3
   3  -5  -5 221.376  10.108   1
   3  -5  -5 235.910   9.684   3
  -3   5   5 244.166  10.663   3
  -3   5   5 245.459   9.511   4
  -3   5   5 241.178  10.623   1
   2  -5  -5 1010.31   28.89   3
   2  -5  -5 937.510  29.935   1
  -2   5   5 1012.14   30.47   1
  -2   5   5 936.420  28.666   3
  -2   5   5 984.132  28.424   4
   1  -5  -5 261.099  12.467   1
   1  -5  -5 289.054  10.451   3
  -1   5   5 283.605  11.383   1
  -1   5   5 275.761  10.500   4
  -1   5   5 284.682  40.543   3
   0  -5  -5 59.3208  4.9218   1
   0  -5  -5 61.4831  4.4733   3
   0   5   5 50.9695  4.5654   4
   0   5   5 55.3141  5.4018   1
  -1  -5  -5 2.99382 3.28938   1
  -1  -5  -5 2.99738 2.32626   3
   1   5   5 0.09083 2.78900   1
   1   5   5 -0.6630  2.2814   4
   1   5   5 1.97473 2.33949   2
  -2  -5  -5 67.8228  6.1639   1
  -2  -5  -5 67.2910  5.5583   1
   2   5   5 69.5060  5.6205   4
   2   5   5 65.4060  4.8054   2
  -3  -5  -5 -3.1400  3.7797   1
   3   5   5 1.37037 3.80918   4
  -4  -5  -5 13.9182  3.8717   1
  -5  -5  -5 43.4399  5.8134   1
  -7   6   5 21.5562  6.9273   3
  -6   6   5 -2.2261  5.4278   3
  -6   6   5 7.70986 4.88076   1
  -5   6   5 65.5048  5.6103   1
  -5   6   5 69.9903  7.0694   3
  -5   6   5 57.8680  4.7036   4
  -4   6   5 46.4825  4.2670   4
  -4   6   5 47.7710  5.0207   1
  -4   6   5 53.2603  6.6445   3
  -3   6   5 133.900   7.766   4
  -3   6   5 132.048   9.439   1
  -3   6   5 134.057   8.516   3
   2  -6  -5 839.860  25.754   3
  -2   6   5 807.789  25.478   4
  -2   6   5 860.482  34.756   3
  -2   6   5 825.992  36.175   1
   1  -6  -5 37.9598  4.6053   3
   1  -6  -5 33.9644  4.2761   1
  -1   6   5 27.6101  5.4181   3
  -1   6   5 29.0371  4.6825   4
  -1   6   5 34.1843  5.4166   1
   0  -6  -5 308.726  11.687   3
   0   6   5 293.930  12.378   1
   0   6   5 291.630  11.587   4
   1   6   5 5.19420 4.39224   1
   1   6   5 11.6649  4.2527   2
   2   6   5 170.192   9.735   1
  -3  -6  -5 134.979   9.177   1
  -4  -6  -5 264.473  12.746   1
  -5  -6  -5 39.5289  5.8558   1
  -6   7   5 59.5873  7.7510   3
  -6   7   5 64.8445  7.2291   1
  -5   7   5 8.88836 4.74725   1
  -5   7   5 4.18384 4.04117   3
  -4   7   5 2.65413 4.19268   1
  -4   7   5 -0.5377  3.8652   3
  -3   7   5 669.172  23.830   1
  -3   7   5 642.277  21.924   3
  -2   7   5 1.18224 3.87280   3
  -2   7   5 -0.7207  3.5602   1
  -1   7   5 15.9775  5.1890   1
   0   7   5 6.06225 5.14209   1
   1   7   5 134.898   8.663   1
   2   7   5 45.1173  6.6114   1
  -3  -7  -5 1.18494 4.97954   1
  -4  -7  -5 125.788   9.185   1
  -6   8   5 3.59460 4.43728   1
  -6   8   5 25.3118  7.0305   3
  -5   8   5 15.8080  4.7805   3
  -5   8   5 15.4407  6.0938   1
  -4   8   5 2.58748 5.40238   1
  -4   8   5 3.89451 5.05784   3
  -3   8   5 24.8297  4.7456   3
  -3   8   5 15.9466  5.2834   1
  -2   8   5 11.4847  4.4567   1
  -1   8   5 320.952  15.082   1
   0   8   5 62.5829  7.4853   1
   1   8   5 21.7290  6.4753   1
   2   8   5 44.1725  6.8525   1
  -3  -8  -5 -7.5272  6.3404   1
  -5   9   5 19.2618  5.6855   3
  -4   9   5 -4.3887  5.7867   1
  -4   9   5 4.95774 5.55376   3
  -3   9   5 21.7976  5.4886   3
  -3   9   5 28.5170  5.3326   1
  -2   9   5 51.2426  6.0643   1
  -1   9   5 99.5406  9.7921   1
   0   9   5 0.59475 6.17757   1
   1   9   5 58.6526  8.1948   1
   2   9   5 3.25012 6.39210   1
  -3  10   5 5.11745 6.52882   1
  -3  10   5 1.16092 5.87451   3
  -2  10   5 117.274  10.308   1
   0  10   5 29.3456  7.4817   1
   0 -10   6 39.0451  6.0961   4
  -2  10  -6 7.90829 6.45768   1
   2 -10   6 2.54628 5.04095   4
  -3  10  -6 5.78209 4.73309   1
   0   9  -6 91.0403  7.1777   1
  -1   9  -6 20.0423  5.7666   1
  -2   9  -6 -0.2480  5.0484   1
  -3   9  -6 -11.884   6.558   1
  -4   9  -6 122.761  10.724   1
   4  -9   6 107.474   7.563   4
  -5   9  -6 53.6863  8.1114   1
   3   8  -6 79.3090  5.9194   1
   2   8  -6 259.822  11.470   1
   1   8  -6 5.53639 4.14192   1
   0  -8   6 125.617   5.186   3
  -1   8  -6 52.9745  5.6246   1
   1  -8   6 54.6957  3.1599   3
  -2   8  -6 308.803  14.333   1
  -3   8  -6 210.223  11.822   1
  -3   8  -6 175.917   7.786   3
   3  -8   6 194.114   9.817   4
  -4   8  -6 14.7989  4.4475   3
  -4   8  -6 26.9995  7.7162   1
   4  -8   6 27.9655  5.7667   4
  -5   8  -6 5.99139 3.48279   3
  -5   8  -6 -1.1370  5.5540   1
   3   7  -6 3.05213 3.48586   1
  -3  -7   6 2.31420 4.55546   4
   2   7  -6 71.5906  5.9636   1
  -2  -7   6 78.0112  9.2164   4
  -2  -7   6 72.6820  4.3801   3
  -2  -7   6 75.3764  5.0143   1
   1   7  -6 2.53382 4.38165   1
  -1  -7   6 5.02928 1.95927   3
  -1  -7   6 2.41951 3.32915   1
   0   7  -6 421.255  15.678   1
   0  -7   6 388.047  11.841   3
   0  -7   6 397.950  15.230   1
   0  -7   6 392.925  14.959   4
  -1   7  -6 26.2628  4.9002   1
   1  -7   6 27.6190  2.1058   3
   1  -7   6 16.0560  4.6735   4
  -2   7  -6 -0.1637  4.5688   1
  -2   7  -6 1.43154 3.66916   4
  -2   7  -6 0.77861 2.15244   3
   2  -7   6 3.19652 3.15307   4
  -3   7  -6 15.3634  2.9003   4
  -3   7  -6 22.3033  3.3264   3
  -3   7  -6 18.8392  5.7312   1
   3  -7   6 16.6682  3.9458   4
  -4   7  -6 61.5555  4.9175   3
  -4   7  -6 51.8507  4.3704   4
  -4   7  -6 66.3783  7.2202   1
   4  -7   6 65.9321  5.3213   4
  -5   7  -6 27.4388  3.7141   3
  -5   7  -6 33.2446  6.4549   1
  -6   7  -6 3.94157 5.96792   1
  -6   7  -6 2.44440 4.11342   3
  -5  -6   6 -3.1982  3.5374   4
  -4  -6   6 67.1125  6.3891   4
   3   6  -6 23.5189  8.3426   1
  -3  -6   6 33.6126  5.7872   4
  -3  -6   6 26.9286  2.9347   1
   2   6  -6 433.185  14.762   1
  -2  -6   6 437.442  16.022   4
  -2  -6   6 408.179  14.277   1
   1   6  -6 1682.26   47.33   2
   1   6  -6 1628.04   46.60   4
   1   6  -6 1680.12   48.15   1
  -1  -6   6 1676.65   44.70   3
  -1  -6   6 1696.73   48.03   1
  -1  -6   6 1682.86   47.21   4
   0   6  -6 322.035  11.884   4
   0   6  -6 315.840  11.780   2
   0   6  -6 314.802  12.364   1
   0  -6   6 321.493  11.933   1
   0  -6   6 311.637   9.251   3
   0  -6   6 304.686  11.888   4
  -1   6  -6 235.183  10.427   1
  -1   6  -6 223.141   9.323   4
   1  -6   6 224.947   9.868   1
   1  -6   6 227.706   6.995   3
   1  -6   6 217.734   9.662   4
  -2   6  -6 296.715   9.182   3
  -2   6  -6 281.990  11.750   1
  -2   6  -6 293.900  10.772   4
   2  -6   6 291.564  11.090   4
   2  -6   6 259.636  11.810   1
  -3   6  -6 22.3211  5.0536   1
  -3   6  -6 17.5501  2.9175   3
  -3   6  -6 18.2262  3.2689   4
   3  -6   6 24.5036  3.5278   4
  -4   6  -6 52.0334  6.5055   1
  -4   6  -6 51.5326  4.6135   3
  -4   6  -6 46.1653  3.6065   4
   4  -6   6 49.5798  4.1244   4
  -5   6  -6 35.8227  4.4509   3
  -5   6  -6 35.7037  6.5046   1
  -6   6  -6 21.8207  5.0181   3
  -6   6  -6 16.8105  6.0810   1
  -6  -5   6 21.3724  4.8371   3
  -6  -5   6 20.8778  4.8042   4
  -5  -5   6 2.74726 4.19314   4
  -5  -5   6 2.07271 5.35397   2
  -4  -5   6 105.967   6.609   4
  -4  -5   6 97.3133  7.0284   2
  -4  -5   6 93.7461  4.0583   1
   3   5  -6 36.6089  6.4911   4
  -3  -5   6 25.2090  2.7416   1
  -3  -5   6 29.4027 11.7821   4
   2   5  -6 827.827  24.344   1
   2   5  -6 838.412  25.295   2
   2   5  -6 831.756  25.107   4
  -2  -5   6 789.001  24.069   1
  -2  -5   6 795.806  24.838   4
   1   5  -6 76.4389  5.2130   4
   1   5  -6 79.3795  5.2545   2
   1   5  -6 71.6727  4.5205   1
  -1  -5   6 76.1375  4.7395   1
  -1  -5   6 75.2213  6.2913   4
  -1  -5   6 75.6485  3.3712   3
   0   5  -6 377.701  12.867   4
   0   5  -6 370.568  13.203   1
   0   5  -6 370.410  12.690   2
   0  -5   6 386.268  13.167   1
   0  -5   6 355.657  13.015   4
  -1   5  -6 1892.43   50.54   3
  -1   5  -6 2017.28   55.43   1
  -1   5  -6 1968.85   52.32   4
   1  -5   6 1879.92   52.25   4
   1  -5   6 1960.48   55.23   1
  -2   5  -6 75.4268  5.4270   1
  -2   5  -6 82.8489  3.7498   3
  -2   5  -6 99.5879  5.0819   4
   2  -5   6 88.2971  5.9552   1
   2  -5   6 85.5844  5.2174   4
  -3   5  -6 181.578   9.369   1
  -3   5  -6 179.686   7.003   3
  -3   5  -6 184.670   7.079   4
   3  -5   6 184.745   7.383   4
   3  -5   6 158.379   8.730   1
  -4   5  -6 46.3868  4.6019   3
  -4   5  -6 54.3166  6.2430   1
   4  -5   6 50.6585  3.5947   4
  -5   5  -6 50.1953  4.9829   3
  -5   5  -6 71.2136  7.3307   1
  -6   5  -6 1.38862 4.53703   3
  -6   5  -6 16.8817  5.3861   1
  -7   5  -6 6.08143 5.65733   1
  -7   5  -6 9.36924 4.50682   3
  -6  -4   6 26.2503  4.4267   4
  -6  -4   6 20.3852  4.8972   3
  -6  -4   6 29.5729  6.0835   2
  -5  -4   6 137.075   7.753   4
  -5  -4   6 144.985   8.668   2
  -4  -4   6 416.134  14.829   4
  -4  -4   6 437.517  16.648   2
   3   4  -6 11.6833  4.2102   4
   3   4  -6 15.2924  2.1951   1
   3   4  -6 23.6220  4.3184   2
  -3  -4   6 21.8796  4.8191   2
  -3  -4   6 16.7051  4.5862   4
  -3  -4   6 15.4712  1.6633   1
   2   4  -6 6.22456 3.29042   2
   2   4  -6 8.23170 3.54531   4
   2   4  -6 -0.7346  1.8782   1
  -2  -4   6 3.41305 1.69438   1
  -2  -4   6 2.41487 3.47417   2
  -2  -4   6 5.08576 3.13091   4
   1   4  -6 382.958  12.449   1
   1   4  -6 371.698  12.471   2
   1   4  -6 356.423  15.114   4
  -1  -4   6 386.227  13.347   4
  -1  -4   6 370.921  12.176   1
   0   4  -6 485.911  14.603   2
   0   4  -6 455.180  15.188   1
   0   4  -6 485.073  15.051   4
   0  -4   6 473.919  15.187   4
   0  -4   6 470.239  15.115   1
  -1   4  -6 57.6819  4.5242   1
  -1   4  -6 55.7800  3.8249   4
   1  -4   6 51.1697  4.0644   1
   1  -4   6 52.2941  4.0504   4
  -2   4  -6 425.518  12.627   3
  -2   4  -6 433.786  13.310   4
  -2   4  -6 438.082  15.354   1
   2  -4   6 438.630  13.472   4
   2  -4   6 428.696  15.062   1
  -3   4  -6 2.29980 2.62346   3
  -3   4  -6 6.93155 7.80335   1
   3  -4   6 6.79783 2.36579   4
  -4   4  -6 42.1326  4.4152   3
  -4   4  -6 38.2946  5.4641   1
   4  -4   6 41.1787  2.6341   4
   4  -4   6 43.0023  5.2861   1
  -5   4  -6 437.252  16.866   1
  -5   4  -6 405.982  15.332   3
  -6   4  -6 2.23591 5.01559   1
  -6   4  -6 3.58772 4.04955   3
  -7   4  -6 11.7332  5.6899   1
  -7  -3   6 0.66983 5.10942   2
  -7  -3   6 -10.522   6.039   3
  -6  -3   6 4.11136 3.88545   2
  -6  -3   6 0.31864 3.20518   4
  -6  -3   6 -1.6752  4.9626   3
  -5  -3   6 5.59477 4.88207   2
  -5  -3   6 12.6915  4.8682   3
  -5  -3   6 -1.5214  3.3736   4
  -4  -3   6 230.513  10.599   2
  -4  -3   6 217.019   9.200   4
  -3  -3   6 441.530  15.098   2
  -3  -3   6 413.619  14.112   4
   2   3  -6 1140.21   31.23   1
   2   3  -6 1133.72   32.11   2
  -2  -3   6 1143.44   32.34   2
  -2  -3   6 1130.47   31.74   4
  -2  -3   6 1114.22   31.15   1
   1   3  -6 18.4368  2.3682   2
   1   3  -6 28.8048  2.6165   1
  -1  -3   6 24.8249  2.3349   1
  -1  -3   6 23.1990  1.5259   3
  -1  -3   6 18.3940  3.9781   4
  -1  -3   6 15.6310  2.5552   2
   0   3  -6 374.345  11.163   2
   0   3  -6 367.246  11.932   1
   0   3  -6 357.281  11.450   4
   0  -3   6 354.566  11.713   1
   0  -3   6 357.143  11.577   4
  -1   3  -6 532.276  14.282   3
  -1   3  -6 559.714  17.044   1
   1  -3   6 524.044  16.720   1
   1  -3   6 520.294  15.610   4
  -2   3  -6 20.9283 11.9406   1
  -2   3  -6 25.5808  2.1996   3
   2  -3   6 21.1374  2.3922   4
   2  -3   6 24.7189  3.2417   1
  -3   3  -6 12.1384  2.4540   3
  -3   3  -6 18.2396 32.5099   1
   3  -3   6 17.8021  3.2429   1
   3  -3   6 11.8823  1.8140   4
  -4   3  -6 4.38946 3.24595   3
  -4   3  -6 5.46125 4.20885   1
   4  -3   6 3.76536 3.83937   1
  -5   3  -6 3.19491 3.22519   1
  -6   3  -6 121.254   8.589   1
  -6   3  -6 131.832   8.739   3
  -7   3  -6 8.08008 5.04033   3
  -7   3  -6 2.56899 4.28370   2
  -7   3  -6 6.14651 5.09825   1
  -7  -2   6 20.1024  6.3181   2
  -7  -2   6 22.9309  5.6884   3
  -6  -2   6 291.324  10.960   4
  -6  -2   6 288.263  13.549   2
  -6  -2   6 289.281  13.270   3
  -5  -2   6 4.75542 2.89043   4
  -5  -2   6 -4.5394  4.3994   2
  -5  -2   6 -2.2956  4.1600   3
  -4  -2   6 13.3361  3.2756   4
  -4  -2   6 4.66306 2.82968   3
  -4  -2   6 8.33735 3.19868   2
  -3  -2   6 496.230  15.629   4
  -3  -2   6 500.515  16.390   2
  -3  -2   6 512.466  15.636   3
   2   2  -6 4450.71  116.26   1
  -2  -2   6 4169.59  117.96   1
  -2  -2   6 4253.08  110.75   4
  -2  -2   6 4234.70  111.86   3
  -2  -2   6 4365.81  112.58   2
   1   2  -6 36.9264  2.8930   2
   1   2  -6 32.4161  2.2290   1
  -1  -2   6 37.1086  7.0127   4
  -1  -2   6 35.2135  3.2485   2
  -1  -2   6 33.7167  2.2185   1
  -1  -2   6 37.2085  1.9338   3
   0   2  -6 -0.0950  2.5050   1
   0  -2   6 4.26238 9.19069   4
   0  -2   6 1.42695 1.95022   1
  -1   2  -6 30.4381  9.4996   1
   1  -2   6 28.7051  3.0098   1
   1  -2   6 34.7764  2.5133   4
  -2   2  -6 2.62743 2.86514   1
   2  -2   6 4.15264 2.68189   1
   2  -2   6 1.22362 1.54525   4
  -3   2  -6 23.4449  3.0857   1
   3  -2   6 24.0151  3.6708   1
   3  -2   6 23.5061  1.6415   4
  -5   2  -6 32.0363  5.1899   1
  -6   2  -6 11.8201  4.9765   1
  -6   2  -6 6.81062 3.69707   2
  -7   2  -6 5.66448 4.42403   1
  -7   2  -6 2.94702 5.67365   3
  -7   2  -6 -4.4362  4.0733   2
  -7  -1   6 -2.4835  5.7991   3
  -7  -1   6 -2.3334  5.6353   2
  -6  -1   6 13.8396  2.9896   4
  -6  -1   6 8.99926 5.62934   3
  -6  -1   6 9.29583 4.08291   2
  -5  -1   6 -1.4881  2.7809   3
  -5  -1   6 -0.8840  4.1378   2
  -5  -1   6 1.24912 1.92910   4
  -4  -1   6 186.779   8.708   2
  -4  -1   6 183.005   7.259   4
  -4  -1   6 172.285   7.778   3
  -3  -1   6 184.959   8.332   2
  -3  -1   6 172.508   7.093   3
  -3  -1   6 177.809   6.948   4
  -2  -1   6 91.4192  4.2611   3
  -2  -1   6 91.9412  4.8293   2
   1   1  -6 926.514  24.965   3
   1   1  -6 924.897  25.826   1
  -1  -1   6 955.644  25.804   1
  -1  -1   6 933.871  25.015   3
  -1  -1   6 920.572  25.977   2
   0   1  -6 7368.81  201.00   1
   0   1  -6 6890.88  186.70   3
   0  -1   6 7285.95  194.76   1
   0  -1   6 7511.07  191.06   2
  -1   1  -6 3859.36  101.47   1
   1  -1   6 3615.41  101.10   1
  -2   1  -6 642.237  34.371   1
   2  -1   6 642.054  19.818   1
  -3   1  -6 137.320   6.874   1
  -3   1  -6 136.860   5.164   2
   3  -1   6 135.776   6.503   1
  -4   1  -6 110.506   5.178   2
  -4   1  -6 97.6382  6.2608   1
   4  -1   6 106.961   6.395   1
  -5   1  -6 72.4918  4.8645   2
  -5   1  -6 73.2330  6.0659   1
   5  -1   6 65.9120  5.1978   1
  -6   1  -6 0.77657 4.23693   1
  -6   1  -6 -4.9843  3.5530   2
  -7   1  -6 16.2733  3.6046   2
  -7   1  -6 15.1502  5.2417   1
  -7   0   6 51.2156  7.4796   2
  -6   0   6 68.5467  4.2974   4
  -6   0   6 75.4239  7.1207   3
  -6   0   6 75.1359  7.3157   2
  -5   0   6 14.4415  4.7216   3
  -5   0   6 15.7749  2.8203   4
  -4   0   6 0.91019 2.22738   4
  -4   0   6 5.82100 3.44738   3
  -3   0   6 1181.92   33.11   3
   2   0  -6 691.319  19.752   3
   2   0  -6 676.151  19.191   1
   2   0  -6 700.245  19.289   1
  -2   0   6 702.802  19.893   3
   1   0  -6 207.328   6.664   1
   1   0  -6 197.711  13.037   1
   1   0  -6 202.148   6.992   3
  -1   0   6 205.524   6.714   3
   0   0  -6 649.083  18.781   1
   0   0  -6 644.097  17.702   3
   0   0   6 638.128  17.728   3
   0   0   6 621.375  18.590   1
   1   0   6 2069.52   57.96   1
  -2   0  -6 1168.94   30.59   2
  -2   0  -6 1125.68   33.51   1
   2   0   6 1175.74   33.46   1
  -3   0  -6 788.426  23.945   1
  -3   0  -6 755.780  21.465   2
   3   0   6 761.228  23.600   1
   3   0   6 767.146  20.634   4
  -4   0  -6 0.42718 2.15023   2
  -4   0  -6 2.52521 3.42604   1
   4   0   6 2.08063 2.23477   1
  -5   0  -6 255.169  10.981   1
  -5   0  -6 260.292  10.013   2
   5   0   6 283.276  11.557   1
  -6   0  -6 34.0775  4.3170   2
  -6   0  -6 22.7500  4.8134   1
  -7   0  -6 28.0208  5.1901   1
  -7   0  -6 26.2183  5.2462   2
  -7   1   6 19.6023  6.6140   3
  -7   1   6 6.53055 6.41557   2
  -6   1   6 15.3673  2.5588   4
  -6   1   6 12.7506  1.7194   1
  -6   1   6 17.0099  4.4109   3
   5  -1  -6 31.9088  2.4320   1
  -5   1   6 31.0462  2.2824   1
  -5   1   6 43.8951  6.3097   3
   4  -1  -6 305.589   9.436   1
  -4   1   6 300.809  11.599   3
  -4   1   6 299.580   9.419   1
   3  -1  -6 41.5445  2.4771   1
   3  -1  -6 45.9896  4.1717   3
  -3   1   6 49.4438  2.6745   1
  -3   1   6 40.2162  4.2026   3
   2  -1  -6 43.9126  2.5459   1
   2  -1  -6 45.3288  3.3438   3
  -2   1   6 47.4847  3.6403   3
  -2   1   6 41.4136  2.6351   1
   1  -1  -6 101.232   4.578   3
   1  -1  -6 103.380   4.530   1
  -1   1   6 108.393   4.659   1
  -1   1   6 111.591   4.861   3
   0  -1  -6 786.288  22.084   3
   0  -1  -6 774.605  22.936   1
   0  -1  -6 806.496  23.083   1
   0   1   6 795.555  22.081   3
  -1  -1  -6 1.30579 6.16193   1
   1   1   6 4.47522 9.60250   2
  -2  -1  -6 78.5956  4.8905   1
   2   1   6 77.2746  3.7581   4
   2   1   6 76.6096  3.4129   2
   2   1   6 71.5276  4.5162   1
  -3  -1  -6 116.973   5.179   2
  -3  -1  -6 117.987   6.373   1
   3   1   6 122.897   4.816   4
   3   1   6 119.174   6.146   1
  -4  -1  -6 -2.0588  2.5379   2
  -4  -1  -6 6.16398 3.39299   1
   4   1   6 -0.9220  3.2461   1
   4   1   6 1.32613 1.46594   4
  -5  -1  -6 45.5483  5.2843   1
  -5  -1  -6 46.8993  4.7119   2
   5   1   6 33.1347  5.1986   1
  -6  -1  -6 103.322   6.997   2
  -6  -1  -6 128.838   8.021   1
  -7  -1  -6 21.2136  5.2145   1
  -7  -1  -6 22.5235  5.0534   2
  -7   2   6 21.2669  6.6294   3
  -6   2   6 155.329   6.456   4
  -6   2   6 153.081   6.461   1
  -6   2   6 158.590   9.904   3
   5  -2  -6 -3.8824  3.4037   1
  -5   2   6 11.1567  2.8846   1
  -5   2   6 4.82702 5.90780   3
   4  -2  -6 244.025   8.886   1
   4  -2  -6 252.659  10.529   3
  -4   2   6 260.970  10.795   3
  -4   2   6 261.190   9.069   1
   3  -2  -6 1204.70   33.89   3
   3  -2  -6 1218.68   33.95   1
  -3   2   6 1205.37   33.95   1
  -3   2   6 1168.43   33.98   3
   2  -2  -6  0.5533 16.8187   1
   2  -2  -6 0.29975 2.57053   3
  -2   2   6 1.74834 2.27822   1
  -2   2   6 4.04470 3.14781   3
   1  -2  -6 760.800  22.075   3
   1  -2  -6 796.712  22.821   1
  -1   2   6 758.163  22.734   1
  -1   2   6 780.092  22.260   3
   0  -2  -6 45.9717  3.5248   3
   0  -2  -6 44.0722  3.3847   1
   0   2   6 52.9238  3.9766   3
   0   2   6 47.1401  3.6731   1
  -1  -2  -6 1161.68   32.68   3
  -1  -2  -6 1191.73   34.06   1
  -1  -2  -6 1090.22   33.92   1
   1   2   6 1202.44   31.83   2
   1   2   6 1239.25   32.14   4
  -2  -2  -6 1224.75   36.66   1
  -2  -2  -6 1286.09   36.88   1
   2   2   6 1276.55   34.26   4
   2   2   6 1268.31   34.44   2
  -3  -2  -6 58.4075  5.2232   1
  -3  -2  -6 65.7592  4.7935   1
   3   2   6 71.5337  4.4760   2
   3   2   6 68.3834  4.0581   4
  -4  -2  -6 447.174  15.888   1
  -4  -2  -6 457.694  16.138   1
  -4  -2  -6 439.796  14.864   2
   4   2   6 464.011  13.856   4
  -5  -2  -6 111.643   6.620   2
  -5  -2  -6 111.220   7.424   1
  -6  -2  -6 11.5131  4.0324   2
  -7   3   6 12.6995  4.9207   3
  -6   3   6 69.3250  4.8209   1
  -6   3   6 65.6573  7.1417   3
   5  -3  -6 -4.9573  3.1704   1
  -5   3   6 -0.8298  5.1995   3
   4  -3  -6 134.015   6.190   1
   4  -3  -6 131.688   6.967   3
  -4   3   6 136.622   6.676   1
  -4   3   6 153.674   8.371   3
   3  -3  -6 398.234  13.901   3
   3  -3  -6 397.117  13.589   1
  -3   3   6 413.076  14.325   3
  -3   3   6 418.905  13.810   1
   2  -3  -6 26.1999  2.8769   3
   2  -3  -6 17.9506  2.7789   1
  -2   3   6 20.9420  3.3383   1
  -2   3   6 23.2667  4.0263   3
   1  -3  -6 371.686  12.483   1
   1  -3  -6 373.846  12.078   3
  -1   3   6 374.542  12.506   3
  -1   3   6 354.511  12.549   1
   0  -3  -6 988.788  29.021   1
   0  -3  -6 1009.22   28.00   3
   0   3   6 995.070  27.576   4
   0   3   6 942.710  29.075   1
  -1  -3  -6 97.5890  6.7790   1
  -1  -3  -6 97.3827  5.5327   3
  -1  -3  -6 95.6753  5.2644   1
   1   3   6 100.024   5.340   4
  -2  -3  -6 2815.34   78.93   1
  -2  -3  -6 2803.43   78.18   1
   2   3   6 2775.72   74.47   2
   2   3   6 2829.53   73.73   4
  -3  -3  -6 551.173  18.723   1
  -3  -3  -6 548.955  18.887   1
   3   3   6 573.533  17.664   2
   3   3   6 557.707  17.142   4
  -4  -3  -6 88.9252  6.0220   1
   4   3   6 77.8512  4.8780   4
  -5  -3  -6 96.9476  7.4764   1
  -7   4   6 -2.9780  5.5763   3
  -6   4   6 58.7771  5.1884   1
  -6   4   6 59.2602  6.0516   3
   5  -4  -6 10.4921  3.5275   1
  -5   4   6 10.2906  2.4782   4
  -5   4   6 20.1494  3.8357   1
  -5   4   6 12.1918  5.2681   3
   4  -4  -6 198.495   8.614   1
  -4   4   6 192.732   9.694   3
  -4   4   6 194.570   8.780   1
  -4   4   6 174.979   7.638   4
   3  -4  -6 31.2547  4.0747   1
   3  -4  -6 35.0397  4.3869   3
  -3   4   6 44.3358  3.9134   4
  -3   4   6 38.9620  4.9812   3
  -3   4   6 36.4817  3.8935   1
   2  -4  -6 114.699   6.324   1
   2  -4  -6 119.304   6.308   3
  -2   4   6 118.404   6.181   1
  -2   4   6 110.932   5.963   3
  -2   4   6 111.016   5.472   4
   1  -4  -6 472.494  15.819   1
   1  -4  -6 465.716  15.289   3
  -1   4   6 492.101  15.357   4
  -1   4   6 474.386  16.235   1
  -1   4   6 461.221  15.351   3
   0  -4  -6 25.8491  3.0812   3
   0  -4  -6 24.2953  3.8210   1
   0   4   6 23.1409  4.3661   1
   0   4   6 24.1474  3.3078   4
  -1  -4  -6 54.6028  4.9261   3
  -1  -4  -6 60.3666  4.9890   1
   1   4   6 57.8967  4.9442   4
   1   4   6 61.0658  5.5106   1
  -2  -4  -6 212.486   9.559   1
  -2  -4  -6 221.512  10.296   1
   2   4   6 201.424   8.787   2
   2   4   6 217.676   9.141   4
  -3  -4  -6 13.2893  3.9771   1
  -3  -4  -6 17.1107  4.5160   1
   3   4   6 13.4634  3.7454   2
   3   4   6 16.4323  3.4468   4
  -4  -4  -6 900.592  28.582   1
   4   4   6 850.057  25.994   4
  -5  -4  -6 -8.0564  4.4633   1
  -6  -4  -6 35.8274  5.4421   1
  -7   5   6 4.17104 4.41997   3
  -6   5   6 16.0721  4.6433   3
   5  -5  -6 25.2949  4.6040   1
  -5   5   6 27.4526  3.0816   4
  -5   5   6 25.2191  4.5146   1
  -5   5   6 14.2043  5.4457   3
   4  -5  -6 440.991  16.280   1
  -4   5   6 450.422  16.621   3
  -4   5   6 433.922  14.993   4
  -4   5   6 467.247  16.712   1
   3  -5  -6 144.092   7.783   3
   3  -5  -6 145.174   7.722   1
  -3   5   6 161.363   8.761   3
  -3   5   6 148.367   8.188   1
  -3   5   6 137.991   7.203   4
   2  -5  -6 74.2711  5.4655   1
   2  -5  -6 74.5942  5.7313   3
  -2   5   6 76.2325  5.5025   4
  -2   5   6 88.5041  6.6414   1
  -2   5   6 70.8263  5.5006   3
   1  -5  -6 76.0899  5.7967   1
   1  -5  -6 79.9151  5.4494   3
  -1   5   6 91.7173  6.3695   3
  -1   5   6 81.8302  6.5366   1
  -1   5   6 74.8186  5.6166   4
   0  -5  -6 114.914   6.346   1
   0  -5  -6 105.999   6.107   3
   0   5   6 104.220   6.322   4
   0   5   6 112.433   6.784   1
  -1  -5  -6 24.8875  4.2091   1
  -1  -5  -6 31.9716  4.3231   3
   1   5   6 35.8758  5.2815   1
   1   5   6 38.3993  4.5281   4
  -2  -5  -6 246.986  10.935   1
   2   5   6 227.619  10.110   4
   2   5   6 253.668  10.196   2
  -3  -5  -6 170.988   9.259   1
   3   5   6 146.005   8.339   4
  -4  -5  -6 285.725  13.035   1
  -5  -5  -6 45.5824  6.2205   1
  -7   6   6 24.8480  7.4429   3
  -6   6   6 18.8665  5.0136   1
  -6   6   6 7.90301 5.83878   3
  -5   6   6 5.10185 3.28590   1
  -5   6   6 6.03336 5.35499   3
  -4   6   6 43.5588  4.9846   1
  -4   6   6 41.2810  6.3847   3
  -3   6   6 1104.13   34.33   3
  -3   6   6 1171.32   35.87   1
   2  -6  -6 105.181   7.033   3
  -2   6   6 89.8920  8.3474   1
  -2   6   6 119.914   8.573   3
   1  -6  -6 610.469  20.479   3
  -1   6   6 636.158  22.320   1
  -1   6   6 663.562  21.298   3
   0   6   6 219.645  10.935   1
   1   6   6 57.3326  6.1814   1
   1   6   6 57.3770  5.7148   2
  -2  -6  -6 0.76424 3.40371   1
  -3  -6  -6 303.528  14.181   1
  -4  -6  -6 58.8285  7.4363   1
  -5  -6  -6 0.58858 4.62363   1
  -6   7   6 -2.2131  6.3893   3
  -6   7   6 0.08099 5.02971   1
  -5   7   6 30.3853  6.4096   3
  -5   7   6 31.5298  4.8142   1
  -4   7   6 40.8060  5.2178   1
  -4   7   6 43.5364  6.2979   3
  -3   7   6 8.99969 6.14506   3
  -2   7   6 43.7364  6.3286   1
  -2   7   6 44.2740  6.4074   3
  -1   7   6 387.744  16.274   1
   0   7   6 14.7920  5.3057   1
   1   7   6 53.0902  7.0800   1
  -2  -7  -6 -4.5317  5.5959   1
  -3  -7  -6 365.789  16.333   1
  -4  -7  -6 3.27882 5.50331   1
  -5   8   6 32.5765  7.0418   3
  -4   8   6 27.8795  6.2764   3
  -4   8   6 37.6776  5.2851   1
  -3   8   6 47.0493  7.0550   3
  -3   8   6 50.9371  6.9510   1
  -2   8   6 283.193  14.049   1
  -2   8   6 286.289  12.608   3
  -1   8   6 119.888  17.621   1
   0   8   6 53.7326  6.3519   1
   1   8   6 88.7044  8.5440   1
  -2  -8  -6 -1.7587  5.9676   1
  -3  -8  -6 141.465  10.579   1
  -4   9   6 -3.9832  4.3262   1
  -4   9   6 2.85105 6.01361   3
  -3   9   6 44.0542  7.0513   1
  -3   9   6 42.6177  7.2201   3
  -2   9   6 61.5408  8.1334   1
  -1   9   6 216.364  12.852   1
   0   9   6 -1.5447  6.1308   1
   1   9   6 5.37764 4.78151   1
  -2  -9  -6 3.75804 6.40121   1
  -3  10   6 5.89802 4.70705   3
  -3  10   6 -4.2958  6.6369   1
  -2  10   6 74.8261  9.1682   1
  -1  10   6 -0.2522  6.6189   1
   1  10  -7 -2.0646  6.1563   1
   0  10  -7 0.39006 5.69086   1
  -1  10  -7 30.6412  6.1537   1
  -2  10  -7 -8.4184  6.4688   1
   2 -10   7 -0.7977  4.0678   4
  -3  10  -7 0.16251 4.68224   1
   3 -10   7 -8.1800  5.2802   4
   1   9  -7 11.2682  4.7643   1
   0   9  -7 12.4263  5.4694   1
  -2   9  -7 21.8416  4.9459   1
   2  -9   7 14.1401  4.3215   4
  -3   9  -7 4.86954 6.85076   1
  -4   9  -7 82.4436  9.4086   1
  -5   9  -7 -3.3953  6.3554   1
   3   8  -7 1.97069 3.60678   1
  -3  -8   7 0.52494 4.20891   4
   2   8  -7 3.24759 4.54008   1
  -2  -8   7 1.85084 5.49842   4
  -1  -8   7 20.3177  5.3822   4
   0   8  -7 -0.6519  4.5497   1
   0  -8   7 -8.5121  4.6497   4
  -1   8  -7 0.41614 5.05656   1
   1  -8   7 5.23385 3.69680   4
  -2   8  -7 36.9194  6.5694   1
  -3   8  -7 237.455   8.736   3
  -3   8  -7 221.158  12.816   1
  -4   8  -7 354.398  12.517   3
  -4   8  -7 333.032  16.074   1
  -5   8  -7 -0.1306  5.5905   1
  -5   8  -7 0.47580 3.38184   3
  -5  -7   7 8.62809 5.03291   4
  -4  -7   7 -0.3243  4.1521   4
   3   7  -7 174.305   7.996   1
   2   7  -7 157.794   8.055   1
  -2  -7   7 138.108   7.216   1
  -2  -7   7 149.332   6.206   3
   1   7  -7 309.731  12.332   1
  -1  -7   7 302.251  12.121   1
  -1  -7   7 296.585   9.593   3
  -1  -7   7 320.052  13.154   4
   0   7  -7 268.436  11.999   1
   0  -7   7 274.159   8.206   3
   0  -7   7 276.461  11.777   1
  -2   7  -7 64.7985  5.9410   1
  -2   7  -7 57.4613  3.2060   3
   2  -7   7 66.7971  6.3860   4
  -3   7  -7 46.9561  4.8789   4
  -3   7  -7 57.1964  7.0383   1
  -3   7  -7 49.0354  3.9190   3
   3  -7   7 49.1882  5.7343   4
  -4   7  -7 -3.3801  2.4831   4
  -4   7  -7 -1.0302  2.9272   3
  -4   7  -7 -5.6808  5.4186   1
   4  -7   7 5.71080 3.57265   4
  -5   7  -7 40.2082  4.9709   3
  -5   7  -7 51.7879  7.2237   1
   5  -7   7 44.6572  4.0846   4
  -6   7  -7 35.1211  7.0365   1
  -6   7  -7 34.7546  5.6091   3
   3   6  -7 228.331   8.793   1
  -3  -6   7 227.805   8.637   1
   2   6  -7 240.060   9.698   1
  -2  -6   7 232.470   9.301   1
  -2  -6   7 237.802  11.417   4
   1   6  -7 8.68499 6.98745   1
   1   6  -7 2.36086 4.24106   2
  -1  -6   7 -2.0068  6.7258   4
  -1  -6   7 -1.5932  3.4674   1
  -1  -6   7 6.61794 1.82560   3
   0   6  -7 28.8932  4.2747   4
   0   6  -7 20.6739  4.4010   1
   0   6  -7 21.2728  3.6525   2
   0  -6   7 26.6200  5.1292   4
   0  -6   7 23.4939  3.7845   1
  -1   6  -7 65.9500  5.2934   4
  -1   6  -7 72.0522  5.4887   1
   1  -6   7 70.1185  5.6709   1
   1  -6   7 66.5178  5.8039   4
  -2   6  -7 98.3654  5.7888   4
  -2   6  -7 118.922   7.714   1
  -2   6  -7 103.688   4.176   3
   2  -6   7 88.6410  6.2129   4
  -3   6  -7 295.064  12.856   1
  -3   6  -7 279.618   9.746   3
  -3   6  -7 281.095  10.531   4
   3  -6   7 301.846  10.824   4
  -4   6  -7 72.7039  5.0303   3
  -4   6  -7 89.8847  7.8404   1
   4  -6   7 75.8834  5.0752   4
  -5   6  -7 70.7175  7.8382   1
  -5   6  -7 79.4538  6.0381   3
   5  -6   7 75.5543  4.2958   4
  -6   6  -7 13.4583  6.1707   1
  -6  -5   7 9.25964 5.42599   3
  -6  -5   7 17.7934  4.6273   4
  -6  -5   7 11.4852  4.6001   2
  -5  -5   7 106.311   7.946   2
  -5  -5   7 115.839   7.658   4
  -4  -5   7 39.8299  5.4182   4
  -4  -5   7 31.4557  5.9131   2
   3   5  -7 415.559  13.163   1
  -3  -5   7 400.883  15.513   2
  -3  -5   7 446.671  15.780   4
  -3  -5   7 414.551  13.012   1
   2   5  -7 2181.26   59.54   1
   2   5  -7 2118.70   59.22   2
   2   5  -7 2158.52   58.64   4
  -2  -5   7 2161.07   58.88   4
  -2  -5   7 2110.19   59.32   1
   1   5  -7 24.1432  3.5649   2
   1   5  -7 21.6650  4.0727   4
   1   5  -7 16.0067  3.3578   1
  -1  -5   7 19.8328  1.6000   3
  -1  -5   7 17.8839  4.5146   4
  -1  -5   7 17.1602  2.6645   1
   0   5  -7 126.437   6.518   4
   0   5  -7 114.937   6.502   1
   0   5  -7 114.634   5.626   2
   0  -5   7 117.132   6.849   4
   0  -5   7 118.371   6.209   1
  -1   5  -7 160.181  10.941   1
  -1   5  -7 162.575  23.321   4
   1  -5   7 171.450   8.821   4
   1  -5   7 173.200  18.219   1
  -2   5  -7 60.6169  3.0668   3
  -2   5  -7 71.5325  6.0006   1
  -2   5  -7 62.7976  4.3149   4
   2  -5   7 58.7437  5.1074   1
   2  -5   7 60.3052  4.7458   4
  -3   5  -7 74.2584  6.9100   1
  -3   5  -7 65.5919  4.1470   3
   3  -5   7 63.3734  4.6755   4
  -4   5  -7 35.6787  6.0861   1
  -4   5  -7 58.3402  4.8222   3
   4  -5   7 46.1929  3.6106   4
  -5   5  -7 244.261  12.128   1
  -5   5  -7 211.029  10.052   3
  -6   5  -7 8.14055 3.49474   3
  -6   5  -7 20.1053  5.9252   1
  -7   5  -7 27.7156  6.2479   1
  -7   5  -7 22.7248  5.9433   3
  -6  -4   7 24.2716  6.2027   3
  -6  -4   7 14.3602  4.2626   4
  -6  -4   7 27.1374  5.5470   2
  -5  -4   7 9.84595 5.16115   2
  -5  -4   7 -1.0748  3.6882   4
  -5  -4   7 3.92656 3.20714   3
  -4  -4   7 261.980  11.592   2
  -4  -4   7 257.070  10.961   4
   3   4  -7 457.600  13.356   1
  -3  -4   7 441.195  15.386   4
  -3  -4   7 451.715  13.271   1
  -3  -4   7 469.905  16.360   2
   2   4  -7 -0.8009  2.9544   2
   2   4  -7 1.55494 1.92170   1
   2   4  -7 -3.7235  3.4065   4
  -2  -4   7 4.59808 3.88673   4
  -2  -4   7 6.43617 3.76423   2
  -2  -4   7 2.13823 1.61150   1
   1   4  -7 121.537   5.717   1
   1   4  -7 129.090   6.642   4
   1   4  -7 138.147   6.256   2
  -1  -4   7 130.758   4.317   3
  -1  -4   7 137.491   6.987   4
  -1  -4   7 139.034   5.641   1
   0   4  -7 1705.28   47.99   1
   0   4  -7 1669.29   45.91   4
   0   4  -7 1735.39   46.04   2
   0  -4   7 1684.10   46.16   4
   0  -4   7 1714.81   47.87   1
  -1   4  -7 47.3845  3.9564   1
  -1   4  -7 54.5765  3.8226   4
   1  -4   7 57.4408  4.2651   1
   1  -4   7 56.1514  4.2743   4
  -2   4  -7 402.376  11.708   3
  -2   4  -7 403.301  14.442   1
   2  -4   7 402.499  12.647   4
   2  -4   7 382.858  14.214   1
  -3   4  -7 19.3372  2.6263   3
  -3   4  -7 13.7777  4.2597   1
   3  -4   7 15.6853  3.0470   1
   3  -4   7 13.6088  2.5337   4
  -4   4  -7 16.0191  3.8414   3
  -4   4  -7 7.95699 5.30596   1
  -5   4  -7 72.8431  7.5211   1
  -5   4  -7 62.9023  6.0579   3
  -6   4  -7 38.2924  6.2478   1
  -6   4  -7 25.6096  5.3248   3
  -7   4  -7 36.3088  6.6024   3
  -7   4  -7 45.6678  6.9112   1
  -7  -3   7 22.2271  6.5600   2
  -7  -3   7 18.9603  6.1598   3
  -6  -3   7 53.5065  7.0391   2
  -6  -3   7 60.4952  6.7416   3
  -6  -3   7 57.3817  5.1553   4
  -5  -3   7 159.940   8.071   4
  -5  -3   7 162.688   8.972   2
  -5  -3   7 173.487   9.075   3
  -4  -3   7 35.0162  4.4870   4
  -4  -3   7 34.5114  4.5385   3
  -4  -3   7 26.8707  4.1833   2
  -3  -3   7 34.6486  4.4529   2
  -3  -3   7 41.6313  3.6564   3
  -3  -3   7 42.7040  4.5263   4
   2   3  -7 1189.12   32.41   2
   2   3  -7 1130.98   31.35   1
  -2  -3   7 1116.02   31.95   4
  -2  -3   7 1108.23   31.25   1
  -2  -3   7 1140.56   32.33   2
  -2  -3   7 1117.80   30.87   3
   1   3  -7 68.0462  3.7552   2
   1   3  -7 67.0845  3.6166   1
  -1  -3   7 72.4211  2.6484   3
  -1  -3   7 61.0469  4.1668   2
  -1  -3   7 67.8351  4.7533   4
  -1  -3   7 69.9575  3.5401   1
   0   3  -7 347.001  21.488   1
   0   3  -7 368.181  11.112   2
   0  -3   7 346.895  11.770   4
   0  -3   7 368.961  11.791   1
  -1   3  -7 9.09917 2.36807   1
  -1   3  -7 10.5017  0.9057   3
   1  -3   7 9.08635 2.64135   1
   1  -3   7 7.80817 2.62542   4
  -2   3  -7 593.561  19.592   1
   2  -3   7 605.950  19.654   1
   2  -3   7 640.994  17.727   4
  -3   3  -7 217.746   9.395   1
   3  -3   7 215.171   7.258   4
   3  -3   7 226.514   9.738   1
  -4   3  -7 434.623  15.819   1
   4  -3   7 394.699  11.286   4
   4  -3   7 387.234  15.211   1
  -5   3  -7 13.5774  4.4473   3
  -5   3  -7 7.37265 3.44715   1
  -6   3  -7 -6.3512  5.1839   1
  -6   3  -7 4.05807 4.94121   3
  -7   3  -7 -0.3814  4.6281   1
  -7   3  -7 3.52612 5.57363   3
  -7  -2   7 5.95915 5.91908   3
  -7  -2   7 12.5988  6.2755   2
  -6  -2   7 -7.4356  5.4122   3
  -6  -2   7 6.66987 3.11904   4
  -5  -2   7 48.1600  5.4894   3
  -5  -2   7 45.4939  4.3286   4
  -5  -2   7 36.2980  5.5479   2
  -4  -2   7 578.104  18.375   4
  -4  -2   7 575.720  18.799   3
  -4  -2   7 619.278  19.991   2
  -3  -2   7 380.820  13.594   2
  -3  -2   7 378.887  12.892   4
  -3  -2   7 394.303  12.728   3
   2   2  -7 34.0341  1.8951   1
  -2  -2   7 29.8535  2.8261   3
  -2  -2   7 30.0657  8.4798   2
  -2  -2   7 29.7972 17.3527   4
  -2  -2   7 29.7321  1.6560   1
   1   2  -7 1772.28   47.95   1
  -1  -2   7 1750.24   45.86   3
  -1  -2   7 1696.17   46.67   4
  -1  -2   7 1766.66   47.93   1
  -1  -2   7 1781.73   46.93   2
   0   2  -7 6461.25  164.73   2
   0   2  -7 6503.72  171.18   1
   0  -2   7 6314.09  174.52   1
   0  -2   7 6265.87  163.02   4
  -1   2  -7 487.866  15.783   1
  -1   2  -7 502.446  13.483   2
   1  -2   7 497.144  14.579   4
   1  -2   7 497.227  15.696   1
  -2   2  -7 132.586   6.460   1
   2  -2   7 131.974   6.596   1
   2  -2   7 144.802   5.320   4
  -3   2  -7 242.460   9.926   1
   3  -2   7 240.291   9.833   1
   3  -2   7 251.749   7.618   4
  -4   2  -7 70.3198  6.0089   1
   4  -2   7 74.5589  5.8564   1
  -5   2  -7 64.4260  4.4359   2
  -5   2  -7 71.7858  6.5306   1
  -6   2  -7 14.6614  4.9085   1
  -6   2  -7 8.90997 3.16852   2
  -7   2  -7 46.0865  7.3128   3
  -7   2  -7 28.9306  5.9247   1
  -7  -1   7 39.3887  6.9619   2
  -7  -1   7 28.9939  5.3678   3
  -6  -1   7 0.60554 5.11870   2
  -6  -1   7 2.03296 2.60590   4
  -6  -1   7 12.4746  4.8748   3
  -5  -1   7 34.6566  5.1235   2
  -5  -1   7 32.5382  4.7728   3
  -5  -1   7 32.6869  3.4699   4
  -4  -1   7 234.293   8.913   4
  -4  -1   7 221.992   9.670   2
  -4  -1   7 233.853   9.655   3
  -3  -1   7 768.270  22.277   4
  -3  -1   7 747.502  22.401   3
  -3  -1   7 788.541  23.204   2
   2   1  -7 146.912   4.654   1
   2   1  -7 140.149   4.598   1
  -2  -1   7 148.537   5.854   3
  -2  -1   7 144.145   6.083   2
   1   1  -7 359.504  11.208   3
   1   1  -7 378.306  11.668   1
  -1  -1   7 348.029  10.586   3
  -1  -1   7 361.524  15.863   2
  -1  -1   7 365.562  11.029   1
   0   1  -7 3039.57   79.85   3
   0   1  -7 3039.44   93.16   1
   0  -1   7 3101.69   84.31   2
   0  -1   7 3106.59   83.28   1
  -1   1  -7 437.063  18.901   1
   1  -1   7 414.338  13.686   1
  -2   1  -7 57.1184  4.0765   1
  -2   1  -7 58.2423  2.1386   2
   2  -1   7 52.1185  3.7773   1
  -3   1  -7 25.3585  3.2459   1
  -3   1  -7 24.8531  1.9553   2
   3  -1   7 19.8844  3.4492   1
  -4   1  -7 119.711   7.088   1
  -4   1  -7 119.862   5.352   2
   4  -1   7 121.845   7.064   1
  -5   1  -7 39.1830  3.7618   2
  -5   1  -7 41.2264  4.6203   1
  -6   1  -7 47.0659  4.6598   2
  -6   1  -7 55.7154  6.1201   1
  -7   1  -7 25.2283  5.6465   1
  -7   0   7 54.6322  7.4663   3
  -7   0   7 41.3990  7.1935   2
  -6   0   7 8.17138 5.21487   2
  -6   0   7 3.49428 2.64049   4
  -6   0   7 -8.0243  5.1086   3
  -5   0   7 86.4725  6.8315   3
  -5   0   7 69.8845  4.8115   4
  -4   0   7 84.0190  5.6448   3
  -3   0   7 331.662  11.354   3
   2   0  -7 8.10906 2.26290   3
   2   0  -7 5.58371 1.25460   1
  -2   0   7 8.63661 2.50477   3
   1   0  -7 4086.16  108.17   3
   1   0  -7 4219.74  112.88   1
   1   0  -7 4251.99  112.05   1
  -1   0   7 4114.50  108.26   3
   0   0  -7 1477.79   40.88   1
   0   0  -7 1443.84   38.93   3
   0   0   7 1462.50   40.71   1
   0   0   7 1463.44   39.01   3
  -1   0  -7 168.085   6.653   1
   1   0   7 143.047   6.280   1
  -2   0  -7 38.5914  3.6900   1
   2   0   7 44.4063  3.7603   1
  -3   0  -7 1035.57   28.60   2
  -3   0  -7 1065.31   31.80   1
   3   0   7 1063.14   31.62   1
   3   0   7 1045.80   28.11   4
  -4   0  -7 -5.3449  3.4635   1
  -4   0  -7 2.66823 1.81021   2
   4   0   7 1.25297 1.07516   4
   4   0   7 -1.9127  3.2352   1
  -5   0  -7 50.7383  5.5424   1
  -5   0  -7 45.3660  3.7928   2
  -6   0  -7 31.5506  4.1410   2
  -6   0  -7 31.8685  5.2928   1
  -7   0  -7 182.182  10.333   1
  -7   1   7 33.0556  7.1896   2
  -7   1   7 36.4842  7.2262   3
  -6   1   7 37.8194  3.6106   4
  -6   1   7 47.5222  6.5775   3
   5  -1  -7 651.916  18.818   1
  -5   1   7 661.437  18.858   1
  -5   1   7 660.619  21.664   3
   4  -1  -7 10.2806  1.7664   1
  -4   1   7 11.0138  4.0262   3
  -4   1   7 13.4163  1.6343   1
   3  -1  -7 278.227  10.061   3
   3  -1  -7 271.902   8.749   1
  -3   1   7 269.600   8.784   1
  -3   1   7 279.803  10.079   3
   2  -1  -7 521.115  16.039   3
   2  -1  -7 526.937  15.758   1
  -2   1   7 528.941  16.168   3
  -2   1   7 549.940  15.882   1
   1  -1  -7 8.04733 2.33478   3
   1  -1  -7 3.36472 2.16296   1
   1  -1  -7 1.37479 1.73884   1
  -1   1   7 2.18909 2.43500   3
   0  -1  -7 1442.34   38.85   3
   0  -1  -7 1441.38   40.42   1
   0  -1  -7 1459.74   40.55   1
   0   1   7 1401.37   38.86   3
  -1  -1  -7 371.672  12.656   1
  -1  -1  -7 368.938  11.790   3
   1   1   7 395.613  10.666   2
   1   1   7 356.521  12.415   1
  -2  -1  -7 234.876   9.375   1
   2   1   7 249.891   7.628   2
   2   1   7 229.494   9.306   1
  -3  -1  -7 22.5868  2.4865   2
  -3  -1  -7 14.9820  3.3502   1
   3   1   7 15.9947  2.1684   4
   3   1   7 16.7570  3.1113   1
  -4  -1  -7 287.434  10.307   2
  -4  -1  -7 301.017  12.098   1
   4   1   7 287.819  11.881   1
   4   1   7 284.048   9.135   4
  -5  -1  -7 118.897   6.607   2
  -5  -1  -7 125.849   7.640   1
  -6  -1  -7 22.3666  4.3451   1
  -6  -1  -7 11.4163  3.8201   2
  -7   2   7 37.8473  7.2270   3
  -6   2   7 21.5296  2.6329   1
  -6   2   7 28.3873  5.0211   3
   5  -2  -7 227.351   8.412   1
  -5   2   7 236.348  10.605   3
  -5   2   7 236.207   8.474   1
   4  -2  -7 196.567   8.886   3
   4  -2  -7 184.508   7.227   1
  -4   2   7 198.639   7.357   1
  -4   2   7 190.684   8.716   3
   3  -2  -7 95.4573  4.6443   1
   3  -2  -7 85.7453  5.5239   3
  -3   2   7 84.1637  5.7675   3
  -3   2   7 91.7432  4.7102   1
   2  -2  -7 839.694  24.520   1
   2  -2  -7 840.129  24.269   3
  -2   2   7 823.432  24.326   3
  -2   2   7 846.167  24.626   1
   1  -2  -7 861.419  25.719   1
   1  -2  -7 874.188  24.973   3
  -1   2   7 876.205  25.161   3
  -1   2   7 907.149  26.015   1
   0  -2  -7 188.455   7.983   1
   0  -2  -7 201.879   7.612   3
   0  -2  -7 202.704   7.920   1
  -1  -2  -7 912.125  28.559   1
  -1  -2  -7 1009.76   28.83   1
  -1  -2  -7 974.634  27.490   3
  -2  -2  -7 235.110   9.641   1
  -2  -2  -7 254.863  10.179   1
   2   2   7 236.054   8.672   4
   2   2   7 243.166   8.316   2
  -3  -2  -7 565.836  19.087   1
  -3  -2  -7 571.686  19.227   1
   3   2   7 590.193  17.629   2
   3   2   7 579.619  17.185   4
  -4  -2  -7 18.0845  3.8948   1
  -4  -2  -7 28.2647  4.4480   1
   4   2   7 18.1420  2.8399   4
  -5  -2  -7 127.021   7.154   2
  -5  -2  -7 126.799   8.116   1
  -6  -2  -7 41.8208  5.5178   2
  -6  -2  -7 50.7327  6.0275   1
  -7   3   7 -0.6787  4.2020   3
  -6   3   7 54.9117  4.3206   1
  -6   3   7 61.8845  7.1827   3
   5  -3  -7 282.954  10.524   1
  -5   3   7 267.985  11.800   3
  -5   3   7 283.355  10.493   1
   4  -3  -7 10.1820  2.8102   1
   4  -3  -7 6.22406 2.77566   3
  -4   3   7 14.6416  4.5583   3
   3  -3  -7 195.747   8.168   1
   3  -3  -7 188.057   8.384   3
  -3   3   7 196.799   8.876   3
  -3   3   7 209.329   8.358   1
   2  -3  -7 621.132  18.744   3
   2  -3  -7 584.976  18.767   1
  -2   3   7 579.357  18.627   3
  -2   3   7 628.162  19.190   1
   1  -3  -7 321.193  10.724   3
   1  -3  -7 292.932  10.983   1
  -1   3   7 305.146  11.160   3
  -1   3   7 307.151  11.274   1
   0  -3  -7 377.514  12.421   3
   0  -3  -7 356.546  12.757   1
   0   3   7 366.359  12.046   4
   0   3   7 349.790  12.712   1
  -1  -3  -7 1073.86   30.91   3
  -1  -3  -7 1127.86   32.40   1
  -1  -3  -7 1042.16   32.30   1
   1   3   7 1074.71   30.33   4
  -2  -3  -7 727.561  23.954   1
  -2  -3  -7 767.129  23.759   1
   2   3   7 742.474  21.670   2
   2   3   7 718.724  21.847   4
  -3  -3  -7 215.781   9.737   1
  -3  -3  -7 224.426  10.188   1
   3   3   7 220.267   8.595   2
   3   3   7 218.168   8.673   4
  -4  -3  -7 115.070   7.587   1
   4   3   7 103.579   5.760   4
  -5  -3  -7 157.804   9.218   1
  -6  -3  -7 5.79036 4.20205   1
  -7   4   7 18.2513  6.6762   3
  -6   4   7 -0.5471  5.4913   3
  -6   4   7 -0.9197  3.3393   1
   5  -4  -7 7.89643 3.41144   1
  -5   4   7 -0.4691  2.4015   4
  -5   4   7 1.75523 3.68070   3
  -5   4   7 5.09899 3.40670   1
   4  -4  -7 54.2172  4.8381   1
  -4   4   7 48.0165  4.1370   4
  -4   4   7 58.3618  5.2761   1
  -4   4   7 46.2735  6.0537   3
   3  -4  -7 125.110   6.566   1
   3  -4  -7 121.969   6.592   3
  -3   4   7 122.881   6.043   4
  -3   4   7 124.251   7.324   3
  -3   4   7 131.394   6.980   1
   2  -4  -7 16.9309  3.1966   1
   2  -4  -7 17.9153  2.8474   3
  -2   4   7 21.4337  3.4701   4
  -2   4   7 19.1513  3.8451   1
  -2   4   7 15.7846  3.2052   3
   1  -4  -7 74.9945  5.3027   1
   1  -4  -7 80.8157  5.2887   3
  -1   4   7 87.6333  5.8448   3
  -1   4   7 86.9265  5.3339   4
  -1   4   7 75.1109  5.1784   1
   0  -4  -7 807.434  23.624   3
   0  -4  -7 777.810  24.506   1
   0   4   7 787.510  23.247   4
   0   4   7 749.416  24.504   1
  -1  -4  -7 653.156  21.206   1
  -1  -4  -7 597.549  20.497   1
  -1  -4  -7 615.581  19.896   3
   1   4   7 644.996  19.611   4
  -2  -4  -7 711.257  23.080   1
  -2  -4  -7 678.003  22.709   1
  -2  -4  -7 676.255  21.816   3
   2   4   7 695.164  21.268   2
   2   4   7 712.569  21.613   4
  -3  -4  -7 191.048   9.756   1
   3   4   7 174.589   8.326   4
   3   4   7 193.895   8.589   2
  -4  -4  -7 15.8687  4.3479   1
   4   4   7 3.90907 3.97795   4
  -5  -4  -7 4.73329 4.50231   1
  -7   5   7 0.87874 4.44832   3
  -6   5   7 40.1065  5.1927   1
  -6   5   7 30.2702  5.1624   3
   5  -5  -7 24.0031  3.8747   1
  -5   5   7 39.2004  4.9032   1
  -5   5   7 31.0221  3.8350   4
  -5   5   7 32.0426  5.7497   3
   4  -5  -7 36.0603  4.9738   1
  -4   5   7 52.2046  6.5780   3
  -4   5   7 41.6994  5.8173   1
  -4   5   7 51.8657  4.7859   4
   3  -5  -7 75.7765  6.1669   1
  -3   5   7 79.1244  5.5704   4
  -3   5   7 83.5292  6.9419   3
  -3   5   7 91.6097  6.7337   1
   2  -5  -7 235.715  10.546   1
   2  -5  -7 264.369  10.448   3
  -2   5   7 245.503   9.982   4
  -2   5   7 251.565  10.673   3
  -2   5   7 238.725  10.566   1
   1  -5  -7 119.848   6.777   3
   1  -5  -7 128.721   7.280   1
  -1   5   7 118.408   6.719   3
  -1   5   7 121.870   7.610   1
  -1   5   7 131.052   6.913   4
   0  -5  -7 31.9544  4.3666   3
   0  -5  -7 27.3480  3.6227   1
   0   5   7 26.2926  3.9876   1
   0   5   7 32.2777  4.5423   4
  -1  -5  -7 211.589   9.802   3
   1   5   7 227.924  10.270   1
   1   5   7 221.003   9.392   4
  -2  -5  -7 238.771  11.372   1
   2   5   7 228.531   9.876   2
   2   5   7 225.455  10.204   4
  -3  -5  -7 199.299  10.715   1
  -4  -5  -7 44.5063  6.4993   1
  -5  -5  -7 57.2884  6.4801   1
  -6   6   7 5.22114 5.84940   3
  -6   6   7 10.9485  4.6694   1
  -5   6   7 10.4445  5.7086   3
  -5   6   7 5.88795 4.05301   1
  -4   6   7 41.4907  6.7464   3
  -4   6   7 37.4783  5.0940   1
  -3   6   7 106.149   8.656   1
  -3   6   7 89.4958  8.3267   3
  -2   6   7 240.656  11.328   3
  -2   6   7 226.985  10.999   1
  -1   6   7 965.980  30.004   3
  -1   6   7 1008.81   31.66   1
   0   6   7 145.720   9.113   1
   1   6   7 0.36217 3.99693   1
  -2  -6  -7 87.3193  7.8250   1
  -3  -6  -7 635.331  23.395   1
  -4  -6  -7 61.6604  6.5226   1
  -6   7   7 4.76204 5.01204   1
  -6   7   7 -9.5135  6.7776   3
  -5   7   7 36.5804  7.0752   3
  -5   7   7 38.9697  5.9573   1
  -4   7   7 43.4572  6.3314   1
  -3   7   7 3.16755 5.37562   1
  -3   7   7 9.65025 5.75039   3
  -2   7   7 32.7772  6.3558   1
  -2   7   7 31.8608  5.0546   3
  -1   7   7 34.0621  6.4601   1
   0   7   7 -1.6826  5.1373   1
   1   7   7 171.460  10.362   1
  -2  -7  -7 105.825   9.362   1
  -3  -7  -7 73.6634  8.6213   1
  -4  -7  -7 3.25557 4.96672   1
  -5   8   7 -1.9041  5.4677   1
  -5   8   7 5.90601 6.17747   3
  -4   8   7 17.4465  6.1776   1
  -4   8   7 10.5298  6.3039   3
  -3   8   7 4.66096 3.94155   1
  -3   8   7 4.34298 4.41666   3
  -2   8   7 99.8240  9.3903   1
  -2   8   7 126.117   9.166   3
  -1   8   7 242.326  13.179   1
   0   8   7 5.37952 5.83523   1
   1   8   7 9.43858 5.90040   1
  -2  -8  -7 50.9048  8.0474   1
  -3  -8  -7 64.7743  8.2870   1
  -4   9   7 19.5482  6.8595   1
  -3   9   7 1.58921 6.13569   3
  -3   9   7 22.8638  5.3357   1
  -2   9   7 110.248   9.567   1
  -1   9   7 34.7765  7.3264   1
   0   9   7 29.6290  5.8271   1
   1   9   7 104.041   8.744   1
  -2  10   7 100.664   9.884   1
  -1  10  -8 6.77470 5.24432   1
  -2  10  -8 -4.6150  6.5452   1
   2 -10   8 7.86417 5.21465   4
  -3  10  -8 12.3452  5.2440   1
   3 -10   8 24.4324  5.2394   4
   1   9  -8 34.2493  5.4628   1
  -1  -9   8 38.6143  6.5261   4
  -1   9  -8 1.08083 5.51509   1
  -2   9  -8 -2.9224  4.2671   1
   3  -9   8 62.0372  6.4501   4
  -4   9  -8 150.435  11.787   1
  -4  -8   8 2.72700 4.89803   4
   2   8  -8 1.09863 4.06225   1
  -2  -8   8 -0.7741  4.7949   4
   1   8  -8 5.91643 4.91892   1
   0  -8   8 89.5798  7.6489   4
  -2   8  -8 2.61128 4.03627   1
  -3   8  -8 130.703   5.902   3
  -3   8  -8 145.260  10.967   1
   3  -8   8 132.020   8.206   4
  -5   8  -8 37.9890  7.4975   1
   3   7  -8 -1.3435  3.1173   1
  -3  -7   8 4.87300 5.06068   4
   2   7  -8 176.546   8.368   1
  -2  -7   8 159.504   7.718   1
   1   7  -8 25.4086  4.9746   1
  -1  -7   8 20.5899  3.7074   1
  -1  -7   8 25.0244  1.9411   3
   0   7  -8 -2.9160  5.0227   1
   0  -7   8 -4.7810  3.9509   4
  -1   7  -8 152.929   7.790   2
   1  -7   8 134.920   7.787   4
  -2   7  -8 269.229   8.382   3
  -2   7  -8 279.959  12.905   1
   2  -7   8 285.031  11.856   4
  -3   7  -8 601.904  22.031   1
  -3   7  -8 546.882  18.770   4
  -3   7  -8 597.640  17.414   3
   3  -7   8 588.765  19.444   4
  -4   7  -8 -3.9597  2.8665   3
  -4   7  -8 -6.5372  5.7485   1
   4  -7   8 -4.6281  3.4382   4
  -5   7  -8 31.7438  6.7912   1
  -5   7  -8 27.4975  3.9586   3
  -6   7  -8 -2.1608  4.2575   3
  -6   7  -8 -5.0938  4.8025   1
  -5  -6   8 6.96859 5.57020   2
  -5  -6   8 -6.7958  3.8614   4
  -5  -6   8 6.80732 4.45836   3
  -4  -6   8 2.25449 3.77876   4
   3   6  -8 5.91499 2.83844   1
  -3  -6   8 10.8406  2.2442   1
  -3  -6   8 4.05190 4.74056   4
   2   6  -8 127.270   6.655   1
  -2  -6   8 123.073   6.192   1
   1   6  -8 946.954  28.641   2
   1   6  -8 996.193  29.223   1
  -1  -6   8 916.920  25.464   3
  -1  -6   8 954.312  28.820   1
   0   6  -8 339.475  12.197   2
   0   6  -8 339.081  12.794   1
   0   6  -8 348.130  12.960   4
   0  -6   8 341.221  13.093   4
   0  -6   8 320.992  12.540   1
  -1   6  -8 299.062  11.589   4
  -1   6  -8 292.212  12.456   1
  -1   6  -8 302.274  11.144   2
   1  -6   8 302.819  11.836   4
   1  -6   8 287.421  12.146   1
  -2   6  -8 -4.0875  5.1852   1
  -2   6  -8 -3.9065  3.4193   4
  -2   6  -8 -0.3913  1.3454   3
   2  -6   8 -1.0809  3.8807   4
  -3   6  -8 0.41160 3.66729   1
  -3   6  -8 2.33090 2.34722   3
  -3   6  -8 -1.8398  2.7028   4
   3  -6   8 2.03201 3.42159   4
  -4   6  -8 49.9570  6.8671   1
  -4   6  -8 39.6668  4.0100   3
   4  -6   8 41.9117  4.3291   4
  -5   6  -8 5.25356 3.94818   3
  -5   6  -8 -3.6098  5.6486   1
  -6   6  -8 12.5393  4.7691   3
  -6   6  -8 14.4992  6.5209   1
  -6  -5   8 -6.0351  4.5298   4
  -6  -5   8 7.27698 5.97747   2
  -6  -5   8 4.22451 4.44172   3
  -5  -5   8 46.7316  6.7732   2
  -5  -5   8 36.7080  5.6324   3
  -5  -5   8 36.6270  5.7062   4
  -4  -5   8 83.0900  5.8624   3
  -4  -5   8 82.1637  6.2802   4
  -4  -5   8 80.9504  7.4838   2
   3   5  -8 84.0610  4.2619   1
  -3  -5   8 79.2335  6.2850   4
  -3  -5   8 74.2653  6.9237   2
  -3  -5   8 82.4624  4.0047   1
   2   5  -8 -5.3115  7.6017   4
   2   5  -8 17.7579  4.5823   2
  -2  -5   8  6.8831 11.4653   4
   1   5  -8 379.330  13.610   4
   1   5  -8 381.584  13.099   1
   1   5  -8 366.754  13.078   2
  -1  -5   8 376.308  13.549   4
  -1  -5   8 381.101  12.873   1
   0   5  -8 302.409  10.705   2
   0   5  -8 296.569  11.344   1
   0   5  -8 291.134  10.910   4
   0  -5   8 306.228  11.179   1
   0  -5   8 291.763  11.142   4
  -1   5  -8 989.867  30.240   1
  -1   5  -8 956.789  28.329   4
  -1   5  -8 1014.33   28.15   2
   1  -5   8 1003.92   30.09   1
   1  -5   8 951.914  28.338   4
  -2   5  -8 135.980   6.223   4
  -2   5  -8 132.044   7.964   1
  -2   5  -8 136.604   4.777   3
   2  -5   8 131.999   7.381   1
   2  -5   8 135.197   6.760   4
  -3   5  -8 822.522  27.911   1
  -3   5  -8 867.071  24.556   3
   3  -5   8 907.739  25.031   4
  -4   5  -8 462.249  17.923   1
  -4   5  -8 481.299  15.500   3
   4  -5   8 459.077  14.374   4
  -5   5  -8 16.6597  5.8208   1
   5  -5   8 10.6450  1.8841   4
  -6   5  -8 5.99752 5.56098   1
  -6   5  -8 9.06689 4.63933   3
  -6  -4   8 40.4291  5.2122   4
  -6  -4   8 27.8137  5.1706   3
  -6  -4   8 23.4329  6.3114   2
  -5  -4   8 7.71480 5.27654   2
  -5  -4   8 6.59694 4.31880   4
  -4  -4   8 17.0232  4.9871   2
  -4  -4   8 25.9952  4.0344   3
   3   4  -8 140.781   4.942   1
  -3  -4   8 146.066   7.759   2
  -3  -4   8 137.715   6.301   3
  -3  -4   8 127.696   4.722   1
  -3  -4   8 140.722   7.887   4
   2   4  -8 528.991  15.817   1
   2   4  -8 514.719  16.834   2
  -2  -4   8 511.854  17.280   4
  -2  -4   8 534.488  15.721   1
  -2  -4   8 518.826  15.233   3
  -2  -4   8 524.259  17.336   2
   1   4  -8 2.09052 2.28399   1
   1   4  -8 4.80923 2.39500   2
  -1  -4   8 3.95715 3.50671   4
  -1  -4   8 3.15688 2.00658   1
   0   4  -8 0.34166 5.78508   1
   0   4  -8 7.22855 2.41830   2
   0  -4   8 1.74214 2.67602   1
   0  -4   8 -5.0060  6.0917   4
  -1   4  -8 6.22798 1.56925   2
  -1   4  -8 1.22340 3.16483   1
   1  -4   8 8.01623 3.19289   4
   1  -4   8 2.51828 2.62008   1
  -2   4  -8 1450.68   38.91   3
  -2   4  -8 1508.56   43.22   1
   2  -4   8 1438.90   43.78   1
   2  -4   8 1458.30   39.81   4
  -3   4  -8 202.486   9.992   1
  -3   4  -8 204.630   7.731   3
   3  -4   8 201.576   7.585   4
   3  -4   8 219.385   9.745   1
  -4   4  -8 948.058  30.243   1
  -4   4  -8 903.139  27.140   3
   4  -4   8 908.717  25.128   4
  -5   4  -8 5.33072 5.15847   1
  -5   4  -8 4.84021 3.99490   3
  -6   4  -8 118.661   8.148   3
  -6   4  -8 128.383   9.311   1
  -7   4  -8 0.17050 5.44223   3
  -7   4  -8 -1.7080  5.7850   1
  -6  -3   8 3.64663 3.74738   4
  -6  -3   8 9.40944 5.39064   3
  -6  -3   8 1.99786 5.51533   2
  -5  -3   8 69.9269  6.1541   3
  -5  -3   8 61.5402  6.5645   2
  -5  -3   8 56.7683  5.3996   4
  -4  -3   8 49.4445  4.7915   3
  -4  -3   8 40.9312  5.4956   2
  -3  -3   8 2.34515 2.40261   3
  -3  -3   8 -5.5558  2.8172   4
  -3  -3   8 1.40179 3.40265   2
   2   3  -8 35.3701  2.3714   1
  -2  -3   8 37.4518  2.6367   3
  -2  -3   8 39.5341  2.3013   1
  -2  -3   8 47.9483  4.5405   2
  -2  -3   8 31.1892  3.7507   4
   1   3  -8 58.8633  3.6466   2
   1   3  -8 67.0601  3.6720   1
  -1  -3   8 70.0627  4.8200   4
  -1  -3   8 62.0882  3.7911   2
  -1  -3   8 63.9387  3.5518   1
  -1  -3   8 69.4586  2.5404   3
   0   3  -8 2269.06   59.69   2
   0   3  -8 2311.39   62.73   1
   0  -3   8 2187.66   59.92   4
   0  -3   8 2290.10   62.50   1
  -1   3  -8 4.20979 3.19887   1
  -1   3  -8 9.78414 1.52954   2
   1  -3   8 10.8763  2.3335   1
   1  -3   8 7.19171 2.85629   4
  -2   3  -8 240.898  10.405   1
   2  -3   8 257.994   8.702   4
   2  -3   8 238.071  10.061   1
  -3   3  -8 -5.9260  3.6901   1
   3  -3   8 -1.9950  1.9229   4
  -4   3  -8 507.250  18.457   1
   4  -3   8 481.018  13.789   4
  -5   3  -8 21.7350  4.5350   1
  -6   3  -8 25.7507  4.5234   3
  -6   3  -8 22.5213  5.3425   1
  -6   3  -8 19.7522  3.4331   2
  -7   3  -8 55.3528  7.3968   3
  -7   3  -8 48.4140  6.0234   1
  -7  -2   8 21.7670  6.2530   2
  -7  -2   8 13.1682  6.0648   3
  -6  -2   8 86.8639  6.6868   3
  -6  -2   8 87.3130  5.6776   4
  -6  -2   8 94.9164  7.2671   2
  -5  -2   8 114.124   6.552   4
  -5  -2   8 106.994   7.198   2
  -5  -2   8 126.264   7.489   3
  -4  -2   8 229.209  10.383   2
  -4  -2   8 213.001   9.166   4
  -4  -2   8 230.195   9.557   3
  -3  -2   8 349.188  12.718   2
  -3  -2   8 345.715  11.704   3
  -3  -2   8 343.704  11.958   4
   2   2  -8 1963.02   52.63   1
  -2  -2   8 1974.07   52.28   4
  -2  -2   8 2000.10   51.82   3
  -2  -2   8 1884.47   52.84   1
  -2  -2   8 1914.39   52.74   2
   1   2  -8 332.641  10.814   1
  -1  -2   8 337.445  10.915   2
  -1  -2   8 342.504   9.819   3
  -1  -2   8 327.224  10.611   1
  -1  -2   8 345.298  11.729   4
   0   2  -8 54.1540 25.0844   1
   0   2  -8 53.6411  2.6250   2
   0   2  -8 46.9374  2.1519   3
   0  -2   8 55.4912  8.6315   1
   0  -2   8 48.3993 48.2862   4
  -1   2  -8 1789.52   51.58   1
  -1   2  -8 1813.47   47.84   2
   1  -2   8 1844.50   48.74   4
   1  -2   8 1900.54   51.67   1
  -2   2  -8 2238.71   65.64   1
   2  -2   8 2416.62   61.27   4
   2  -2   8 2382.65   65.65   1
  -3   2  -8 17.1597  4.0641   1
   3  -2   8 12.4078  3.4060   1
   3  -2   8 14.5048  1.8882   4
  -4   2  -8 64.1900  3.6249   2
  -4   2  -8 68.3038  6.1397   1
   4  -2   8 66.2918  6.1691   1
  -5   2  -8 158.587   6.791   2
  -5   2  -8 151.614   9.016   1
  -6   2  -8 55.8228  4.7604   2
  -6   2  -8 74.3437  6.2204   1
  -7   2  -8 -0.6126  5.2527   1
  -7   2  -8 6.62268 5.40197   3
  -6  -1   8 6.76122 2.77338   4
  -6  -1   8 11.7976  5.1308   3
  -6  -1   8 13.3966  5.2525   2
  -5  -1   8 41.3039  4.6595   2
  -5  -1   8 46.6551  4.2228   4
  -5  -1   8 42.4538  5.2324   3
  -4  -1   8 5.64718 3.68554   3
  -4  -1   8 0.36693 2.76056   2
  -4  -1   8 1.35667 2.27828   4
  -3  -1   8 318.750  11.213   3
  -3  -1   8 335.718  11.672   4
  -3  -1   8 324.049  11.718   2
   2   1  -8 2074.47   55.20   1
   2   1  -8 2004.99   55.12   1
   2   1  -8 2055.00   54.32   3
  -2  -1   8 2016.59   54.88   2
  -2  -1   8 2064.32   54.42   3
   1   1  -8 7911.53  209.44   3
   1   1  -8 8277.29  222.20   1
  -1  -1   8 8202.60  211.31   2
  -1  -1   8 7996.08  209.53   3
  -1  -1   8 8313.10  218.98   1
   0   1  -8 2742.82   74.09   1
   0   1  -8 2655.41   70.54   3
   0  -1   8 2736.10   73.92   1
   0  -1   8 2696.39   70.02   2
  -1   1  -8 441.927  14.972   1
   1  -1   8 484.443  15.158   1
  -2   1  -8 1042.33   30.60   1
   2  -1   8 990.232  30.200   1
  -3   1  -8 149.470   5.142   2
  -3   1  -8 151.538   7.762   1
   3  -1   8 150.550   7.567   1
  -4   1  -8 139.414   5.617   2
  -4   1  -8 142.904   7.945   1
   4  -1   8 148.073   8.039   1
   4  -1   8 141.840   4.617   4
   4  -1   8 131.000   4.574   4
  -5   1  -8 38.6319  3.5181   2
  -5   1  -8 44.2700  5.6366   1
  -6   1  -8 25.4983  4.4144   1
  -6   1  -8 32.9624  4.1618   2
  -7   1  -8 16.3666  4.2735   1
  -7   0   8 4.05278 4.93862   2
  -7   0   8 -1.3747  4.1835   3
  -6   0   8 5.54940 3.77086   2
  -6   0   8 6.44335 4.79338   3
  -6   0   8 9.57408 3.23540   4
  -5   0   8 141.884   8.094   3
  -5   0   8 143.845   6.754   4
  -4   0   8 226.250   9.612   3
   3   0  -8 113.730   3.898   1
   3   0  -8 107.702   5.826   3
   3   0  -8 117.763   3.996   1
  -3   0   8 108.374   6.038   3
   2   0  -8 422.435  13.010   1
   2   0  -8 441.630  13.143   1
   2   0  -8 449.314  13.549   3
  -2   0   8 445.370  13.744   3
   1   0  -8 594.803  17.418   1
   1   0  -8 592.702  21.940   1
   1   0  -8 589.617  16.842   3
  -1   0   8 563.206  16.915   3
   0   0  -8 29.5192  3.1746   1
   0   0  -8 32.1795  2.7342   3
   0   0   8 37.4635  3.0654   1
  -1   0  -8 160.725   6.976   1
  -1   0  -8 151.803   6.048   3
   1   0   8 157.123   6.635   1
  -2   0  -8 391.558  13.502   1
   2   0   8 365.442  13.171   1
  -3   0  -8 270.648  11.015   1
  -3   0  -8 276.689   8.635   2
   3   0   8 281.974  11.174   1
  -4   0  -8 8.89634 2.09919   2
  -4   0  -8 13.3572  3.1251   1
   4   0   8 10.4497  1.6841   4
  -5   0  -8 173.995   7.560   2
  -5   0  -8 169.741   8.869   1
  -6   0  -8 23.9307  3.8881   2
  -6   0  -8 30.9921  5.5806   1
  -7   1   8 0.82411 4.14919   2
  -7   1   8 -4.8025  4.3518   3
  -6   1   8 -1.7849  3.0365   4
  -6   1   8 1.52111 3.94140   3
  -5   1   8 186.271  10.183   3
   4  -1  -8 221.363   7.389   1
  -4   1   8 226.346   7.471   1
  -4   1   8 225.543   9.869   3
   3  -1  -8 725.245  21.581   1
   3  -1  -8 761.514  22.492   3
  -3   1   8 778.052  21.746   1
  -3   1   8 753.285  22.623   3
   2  -1  -8 281.895   9.655   3
   2  -1  -8 262.997   9.052   1
   2  -1  -8 279.931   9.298   1
  -2   1   8 266.352   9.521   3
   1  -1  -8 1412.29   39.11   1
   1  -1  -8 1419.69   37.94   3
   1  -1  -8 1369.95   39.21   1
  -1   1   8 1363.13   37.93   3
   0  -1  -8 715.648  21.571   1
   0  -1  -8 721.358  21.525   1
   0  -1  -8 699.495  20.434   3
  -1  -1  -8 611.889  17.676   3
  -1  -1  -8 555.419  18.575   1
   1   1   8 576.407  18.526   1
   1   1   8 601.840  16.056   2
  -2  -1  -8 510.278  17.296   1
   2   1   8 523.926  14.634   2
   2   1   8 512.235  17.138   1
  -3  -1  -8 25.0165  3.3281   1
   3   1   8 21.1980  2.5139   4
   3   1   8 21.2108  3.6800   1
  -4  -1  -8 113.006   5.501   2
  -4  -1  -8 108.088   7.259   1
   4   1   8 102.036   6.591   1
   4   1   8 117.916   4.901   4
  -5  -1  -8 51.7863  4.9889   1
  -5  -1  -8 40.1344  4.0144   2
  -6  -1  -8 111.064   8.132   1
  -6  -1  -8 105.948   6.791   2
  -7   2   8 31.1533  5.7144   3
  -6   2   8 203.369  11.070   3
  -6   2   8 182.035   7.125   1
   5  -2  -8 2.00358 2.21240   1
  -5   2   8 6.54576 2.22469   1
   4  -2  -8 168.283   8.396   3
   4  -2  -8 154.468   6.489   1
  -4   2   8 161.115   6.574   1
  -4   2   8 158.451   8.534   3
   3  -2  -8 349.868  12.346   3
   3  -2  -8 339.166  11.343   1
  -3   2   8 347.407  11.585   1
  -3   2   8 335.501  12.391   3
   2  -2  -8 104.783   5.290   1
   2  -2  -8 105.033   5.290   3
  -2   2   8 109.450   5.947   3
  -2   2   8 120.509   5.604   1
   1  -2  -8 2092.07   57.77   1
   1  -2  -8 2053.93   55.81   3
  -1   2   8 2074.84   58.26   1
  -1   2   8 2090.57   56.08   3
   0  -2  -8 13.9119  2.6636   3
   0  -2  -8 11.7593  2.5385   1
   0  -2  -8 16.5969  3.4057   1
  -1  -2  -8 419.457  14.723   1
  -1  -2  -8 421.459  14.373   1
  -1  -2  -8 421.137  13.810   3
  -2  -2  -8 499.431  17.247   1
  -2  -2  -8 527.598  17.807   1
   2   2   8 522.325  15.965   4
   2   2   8 525.666  15.367   2
  -3  -2  -8 78.2370  5.4895   1
  -3  -2  -8 80.6302  6.1897   1
   3   2   8 74.0679  4.4079   4
  -4  -2  -8 53.6900  5.8221   1
   4   2   8 54.3371  3.8060   4
  -5  -2  -8 21.4347  5.0461   1
  -6  -2  -8 28.9224  5.2431   1
  -7   3   8 -1.5242  5.7325   3
  -6   3   8 -1.1797  4.6375   3
   5  -3  -8 -0.0236  2.8053   1
  -5   3   8 -2.9587  2.8566   1
  -5   3   8 3.25855 4.97523   3
   4  -3  -8 27.0720  3.8819   3
   4  -3  -8 34.2193  3.5927   1
  -4   3   8 28.2030  4.4169   3
  -4   3   8 27.9259  3.6108   1
   3  -3  -8 105.050   5.755   1
   3  -3  -8 98.5654  5.6841   3
  -3   3   8 97.8404  5.8153   1
  -3   3   8 107.711   6.662   3
   2  -3  -8 243.682   9.596   3
   2  -3  -8 251.251   9.721   1
  -2   3   8 264.795  10.241   3
  -2   3   8 259.186  10.019   1
   1  -3  -8 14.0214  3.0267   1
  -1   3   8 10.1932  2.6183   1
  -1   3   8 13.1136  3.7529   3
   0  -3  -8 1129.50   31.94   3
   0  -3  -8 1117.00   33.37   1
   0  -3  -8 1119.31   33.10   1
   0   3   8 1107.93   33.36   1
  -1  -3  -8 1037.21   29.74   3
  -1  -3  -8 972.413  30.759   1
  -1  -3  -8 1016.39   30.79   1
   1   3   8 1030.70   29.01   4
  -2  -3  -8 614.758  20.832   1
  -2  -3  -8 629.761  21.304   1
   2   3   8 647.979  19.033   2
   2   3   8 643.397  19.357   4
  -3  -3  -8 4.32759 4.24355   1
   3   3   8 4.70751 3.04061   4
   3   3   8 -4.9422  2.8207   2
  -4  -3  -8 506.543  18.335   1
   4   3   8 469.585  15.695   4
  -6  -3  -8 -5.8196  3.6431   1
  -7   4   8 18.5440  6.8331   3
  -6   4   8 3.27162 5.28821   3
  -6   4   8 18.7071  3.6102   1
   5  -4  -8 -0.5288  2.5247   1
  -5   4   8 3.28268 2.10811   4
  -5   4   8 9.02343 3.41287   1
  -5   4   8 -4.2790  4.7578   3
   4  -4  -8 21.6820  3.9266   1
  -4   4   8 27.6907  4.5607   3
  -4   4   8 20.7888  4.3155   1
   3  -4  -8 8.29954 3.50914   1
  -3   4   8 5.66495 3.99880   3
  -3   4   8 8.52298 3.84764   1
   2  -4  -8 418.487  14.605   3
   2  -4  -8 427.624  14.939   1
  -2   4   8 423.152  14.805   3
  -2   4   8 421.515  14.960   1
   1  -4  -8 0.88834 3.03534   3
   1  -4  -8 0.11114 3.00977   1
  -1   4   8 8.62122 3.55747   1
  -1   4   8 4.89868 4.05589   3
  -1   4   8 4.12305 2.36910   4
   0  -4  -8 130.103   7.156   1
   0  -4  -8 130.694   6.512   3
   0   4   8 132.526   7.053   4
   0   4   8 137.069   7.271   1
  -1  -4  -8 234.560  10.012   3
  -1  -4  -8 249.500  10.858   1
  -1  -4  -8 217.611   9.761   1
   1   4   8 229.012   9.616   4
  -2  -4  -8 1130.37   34.62   1
   2   4   8 1132.50   32.24   2
   2   4   8 1099.50   32.35   4
  -3  -4  -8 20.2661  5.0720   1
   3   4   8 17.0238  3.9132   4
  -4  -4  -8 65.0170  6.7822   1
   4   4   8 68.4292  5.2382   4
  -5  -4  -8 66.8651  6.9724   1
  -7   5   8 14.2845  5.0390   3
  -6   5   8 3.16797 3.93730   1
  -6   5   8 -1.4093  3.9123   3
   5  -5  -8 5.31081 4.57535   1
  -5   5   8 15.3642  3.2729   1
  -5   5   8 16.0143  4.2743   3
  -4   5   8 9.59827 3.29648   1
  -4   5   8 8.06975 5.25013   3
  -4   5   8 11.4590  3.5889   4
  -3   5   8 24.3252  5.2162   1
  -3   5   8 18.4148  3.4179   4
   2  -5  -8 45.5478  4.3152   3
   2  -5  -8 50.2176  5.2953   1
  -2   5   8 38.9210  4.7671   4
  -2   5   8 45.5938  5.9313   3
  -2   5   8 48.2817  5.7117   1
   1  -5  -8 30.1395  4.3678   1
   1  -5  -8 24.1362  4.2088   3
  -1   5   8 30.4261  5.1007   3
  -1   5   8 21.5121  4.5790   1
  -1   5   8 19.5747  3.1939   4
   0  -5  -8 429.861  15.126   3
   0   5   8 447.646  15.337   4
   0   5   8 427.156  16.462   1
  -1  -5  -8 238.171  11.505   1
   1   5   8 229.184  10.094   4
  -2  -5  -8 187.976  10.418   1
   2   5   8 177.887   8.485   2
  -3  -5  -8 306.694  13.844   1
  -4  -5  -8 35.3108  6.0319   1
  -5  -5  -8 -4.4576  4.9746   1
  -6   6   8 1.78561 4.00584   1
  -5   6   8 6.42772 5.60334   3
  -5   6   8 15.0019  4.4452   1
  -4   6   8 171.167  10.160   3
  -4   6   8 166.812   9.378   1
  -3   6   8 133.057   8.961   3
  -3   6   8 128.155   8.741   1
  -2   6   8 70.8276  6.7243   3
  -2   6   8 72.1401  6.1218   1
  -1   6   8 50.8082  7.5462   3
  -1   6   8 46.2274  8.7466   1
   0   6   8 23.4208  4.3802   1
   1   6   8 38.9048  6.1498   1
  -2  -6  -8 285.953  13.889   1
  -4  -6  -8 55.7179  7.5623   1
  -6   7   8 7.34369 4.98556   1
  -6   7   8 4.94493 6.63634   3
  -5   7   8 6.96879 5.12479   1
  -5   7   8 5.32278 6.22369   3
  -4   7   8 4.02810 5.92640   3
  -4   7   8 14.5402  5.3814   1
  -3   7   8 8.08994 4.77441   3
  -2   7   8 338.245  14.410   3
  -2   7   8 325.973  14.694   1
  -1   7   8 44.3690  6.6933   1
   0   7   8 22.6197  6.0856   1
   1   7   8 48.3722  5.9938   1
  -2  -7  -8 312.276  15.330   1
  -3  -7  -8 81.9651  8.7112   1
  -5   8   8 10.0747  5.7203   1
  -5   8   8 5.46745 6.41175   3
  -4   8   8 11.5524  5.6331   1
  -4   8   8 8.53367 5.54400   3
  -3   8   8 41.5724  7.4571   3
  -3   8   8 47.9887  7.1918   1
  -2   8   8 83.8045  8.2119   3
  -2   8   8 65.4578  7.8191   1
  -1   8   8 14.1092  4.8431   1
   0   8   8 175.247  11.265   1
   1   8   8 57.1731  6.8228   1
  -2  -8  -8 53.6556  8.2404   1
  -4   9   8 7.69427 6.68019   3
  -4   9   8 1.28048 4.53664   1
  -3   9   8 75.0547  8.1857   3
  -3   9   8 88.6136  9.2566   1
  -2   9   8 25.7012  7.2898   1
  -1   9   8 18.7646  6.6022   1
   0   9   8 62.3486  8.4990   1
   1   9   8 58.6882  8.6074   1
  -1  10  -9 36.4034  6.6194   1
  -2  10  -9 -0.0955  6.1280   1
   2 -10   9 -1.4379  5.4347   4
  -3  10  -9 18.4289  6.6571   1
   3 -10   9 29.9527  5.7615   4
   1   9  -9 5.18607 5.13350   1
  -1  -9   9 -4.5879  4.5154   4
   0   9  -9 2.60347 5.65034   1
   1  -9   9 60.5900  6.7566   4
  -2   9  -9 -6.5071  4.6527   1
  -3   9  -9 43.6578  8.0552   1
   3  -9   9 24.6660  5.5086   4
  -4   9  -9 55.1766  8.7745   1
   2   8  -9 31.1584  4.4123   1
   1   8  -9 83.6908  6.6356   1
   0   8  -9 44.3476  6.2029   1
  -1   8  -9 7.05032 5.32656   1
  -2   8  -9 91.3068  7.2289   1
   2  -8   9 83.7203  7.1062   4
  -3   8  -9 488.661  20.650   1
  -4   8  -9 13.0258  6.6498   1
  -5   8  -9 25.6641  6.8870   1
   3   7  -9 0.02339 2.80555   1
  -3  -7   9 1.82795 4.00924   4
   2   7  -9 -4.2016  4.0510   1
  -2  -7   9 -1.0162  2.9662   1
  -2  -7   9 -4.4757  4.1410   4
   1   7  -9 281.938  11.551   1
  -1  -7   9 263.220  11.137   1
   0   7  -9 216.320  10.412   1
  -1   7  -9 146.331   8.482   1
  -1   7  -9 152.990   7.675   2
  -2   7  -9 19.5927  6.0569   1
  -3   7  -9 10.5897  6.8958   1
  -3   7  -9 -4.7549  2.3749   3
   3  -7   9 -1.2859  5.2095   4
  -4   7  -9 11.6831  3.0197   3
  -4   7  -9 8.26328 5.92922   1
   4  -7   9 7.08413 4.03988   4
  -5   7  -9 15.7612  6.3787   1
  -5   7  -9 11.2557  3.8169   3
  -6   7  -9 1.24554 5.26134   1
  -5  -6   9 3.67912 5.20576   4
  -5  -6   9 -7.1528  5.9478   2
  -5  -6   9 -0.5420  4.1915   3
  -4  -6   9 8.10836 4.94112   4
  -4  -6   9 -2.8566  3.3084   3
   3   6  -9 40.4914  3.4450   1
  -3  -6   9 42.6505  3.6730   3
  -3  -6   9 40.7262  4.9364   4
   2   6  -9 68.0910  4.8927   1
  -2  -6   9 59.6671  4.3264   1
  -2  -6   9 65.1708  3.5549   3
  -2  -6   9 73.7897  6.6067   4
   1   6  -9 124.906   7.245   2
   1   6  -9 125.721   7.587   1
  -1  -6   9 122.047   6.639   1
   0   6  -9 102.612   6.987   1
   0   6  -9 111.617   6.319   2
   0  -6   9 114.336   6.603   1
  -1   6  -9 627.656  19.780   2
  -1   6  -9 662.362  21.779   1
  -1   6  -9 625.540  20.380   4
   1  -6   9 625.737  21.247   1
  -2   6  -9 869.753  28.116   1
  -2   6  -9 846.238  25.798   4
   2  -6   9 870.935  26.151   4
  -3   6  -9 48.3899  3.3142   3
  -3   6  -9 36.9245  4.9667   1
   3  -6   9 51.6428  5.0221   4
  -4   6  -9 191.066   8.123   3
  -4   6  -9 200.423  11.342   1
   4  -6   9 205.175   8.455   4
  -5   6  -9 24.2599  6.0642   1
  -5   6  -9 20.4792  3.8154   3
  -6   6  -9 6.64378 6.55326   1
  -6  -5   9 0.59471 6.00078   2
  -6  -5   9 -1.0513  4.5260   3
  -6  -5   9 9.54341 4.87831   4
  -5  -5   9 37.5966  5.5170   4
  -5  -5   9 31.6879  5.0765   3
  -5  -5   9 30.3882  6.1638   2
  -4  -5   9 -2.6182  2.8775   3
  -4  -5   9 -1.6115  3.7595   2
  -4  -5   9 0.16179 4.45497   4
   3   5  -9 364.092  11.632   1
  -3  -5   9 378.394  14.879   2
  -3  -5   9 376.122  14.666   4
  -3  -5   9 357.926  11.542   1
  -3  -5   9 368.543  12.328   3
   2   5  -9 512.597  17.666   2
   2   5  -9 547.540  16.944   1
  -2  -5   9 537.217  16.707   1
  -2  -5   9 534.650  15.543   3
   1   5  -9 202.570   8.449   1
   1   5  -9 201.099   8.510   2
  -1  -5   9 192.536   8.081   1
  -1  -5   9 185.601   9.270   4
   0   5  -9 0.26594 6.20516   1
   0   5  -9 3.96973 2.52029   2
   0  -5   9 0.99392 3.92541   4
   0  -5   9 7.11567 2.63080   1
  -1   5  -9 35.9012  5.7147   1
  -1   5  -9 44.9560  3.5444   2
   1  -5   9 45.2513  5.3028   4
   1  -5   9 37.3805  4.1108   1
  -2   5  -9 142.230   7.794   1
  -2   5  -9 146.941   4.853   3
   2  -5   9 143.456   7.996   1
   2  -5   9 144.157   7.184   4
  -3   5  -9 109.312   5.383   3
  -3   5  -9 118.408   8.680   1
   3  -5   9 110.749   5.875   4
   4  -5   9 12.6838  3.0736   4
  -5   5  -9 19.6395  4.2838   3
  -5   5  -9 26.1766  6.0334   1
  -6   5  -9 22.6154  6.3455   1
  -6   5  -9 20.0533  4.8469   3
  -6  -4   9 36.4332  6.2246   3
  -6  -4   9 46.5432  5.2258   4
  -6  -4   9 40.7051  7.1277   2
  -5  -4   9 93.9337  6.9680   4
  -5  -4   9 100.535   8.080   2
  -5  -4   9 100.001   6.607   3
  -4  -4   9 24.8296  5.1355   2
  -4  -4   9 25.6847  3.9646   4
  -4  -4   9 24.5068  4.0332   3
  -3  -4   9 478.900  15.177   3
  -3  -4   9 490.837  17.346   2
  -3  -4   9 464.100  16.366   4
   2   4  -9 233.845   9.478   2
   2   4  -9 223.123   8.005   1
  -2  -4   9 225.333   9.542   2
  -2  -4   9 224.974   7.856   1
  -2  -4   9 218.827   9.904   4
  -2  -4   9 229.497   7.590   3
   1   4  -9 28.9420  3.1846   1
   1   4  -9 28.8170  3.2040   2
  -1  -4   9 27.1099  4.2513   4
  -1  -4   9 26.8945  2.7726   1
   0   4  -9 79.3870  5.0496   1
   0   4  -9 85.5467  4.1259   2
   0  -4   9 80.6673  4.8162   1
   0  -4   9 73.9669  5.1802   4
  -1   4  -9 245.972   8.132   2
  -1   4  -9 229.756   9.810   1
   1  -4   9 238.816   9.278   4
   1  -4   9 228.234   9.577   1
  -2   4  -9 -0.6924  1.4673   3
  -2   4  -9 -8.9917  8.2361   1
   2  -4   9 -0.0930  3.6553   1
   2  -4   9 -2.0010  5.9249   4
  -3   4  -9 473.133  14.521   3
  -3   4  -9 448.955  17.315   1
   3  -4   9 478.040  14.601   4
  -4   4  -9 223.216   9.598   3
  -4   4  -9 224.315  11.956   1
   4  -4   9 219.358   7.859   4
  -5   4  -9 -0.7843  4.8654   1
  -5   4  -9 0.03694 3.25730   3
  -6   4  -9 3.89535 4.12610   1
  -6   4  -9 1.88749 3.80305   3
  -6  -3   9 37.9668  6.4464   2
  -6  -3   9 52.7079  5.5099   3
  -6  -3   9 46.8976  5.3809   4
  -5  -3   9 5.21407 3.74570   4
  -5  -3   9 -5.4446  4.1325   3
  -5  -3   9 -1.0465  4.6824   2
  -4  -3   9 266.517  11.028   4
  -4  -3   9 267.768  10.596   3
  -4  -3   9 261.620  11.854   2
  -3  -3   9 514.169  17.010   4
  -3  -3   9 489.559  17.254   2
  -3  -3   9 517.420  15.884   3
   2   3  -9 407.484  12.775   1
  -2  -3   9 429.719  12.737   1
  -2  -3   9 435.992  12.749   3
  -2  -3   9 418.182  14.283   2
  -2  -3   9 427.526  14.490   4
   1   3  -9 19.6882  2.4479   2
   1   3  -9 19.5481  2.6991   1
  -1  -3   9 17.9425  2.7400   2
  -1  -3   9 21.0586  1.3829   3
  -1  -3   9 16.7620  3.6166   4
  -1  -3   9 16.4787  2.2212   1
   0   3  -9  1.3893 11.4562   1
   0   3  -9 6.51168 1.75480   2
   0  -3   9 6.07878 2.33760   1
   0  -3   9 2.20346 9.62549   4
  -1   3  -9 1217.34   32.78   3
  -1   3  -9 1253.82   36.65   1
  -1   3  -9 1249.17   33.29   2
   1  -3   9 1309.25   36.66   1
   1  -3   9 1224.77   34.50   4
  -2   3  -9 559.326  19.372   1
   2  -3   9 607.441  19.503   1
   2  -3   9 572.711  17.303   4
  -3   3  -9 270.173  11.373   1
   3  -3   9 272.835   9.103   4
   3  -3   9 263.384  11.153   1
  -4   3  -9 0.56047 3.78712   1
   4  -3   9 -1.3737  1.7045   4
  -5   3  -9 30.2151  5.7028   1
  -6   3  -9 8.38546 4.88457   1
  -6   3  -9 4.54016 5.08610   3
  -7  -2   9 -1.6255  4.8602   2
  -7  -2   9 -7.3386  5.9708   3
  -6  -2   9 3.67247 3.67995   4
  -6  -2   9 5.85056 5.05726   3
  -6  -2   9 3.18020 4.55410   2
  -5  -2   9 14.7579  4.0755   4
  -5  -2   9 19.2634  4.0519   2
  -5  -2   9 13.5890  4.5368   3
  -4  -2   9 8.02916 3.87935   4
  -3  -2   9 106.554   6.261   4
  -3  -2   9 103.258   5.400   3
  -3  -2   9 106.710   6.394   2
   2   2  -9 94.7534  3.9476   1
  -2  -2   9 87.9608  5.3468   2
  -2  -2   9 98.9443  6.0809   4
  -2  -2   9 103.268   3.852   1
  -2  -2   9 87.9893  4.3459   3
   1   2  -9 3271.46   88.63   1
   1   2  -9 3207.96   84.82   3
  -1  -2   9 3313.16   84.93   3
  -1  -2   9 3284.24   85.63   4
  -1  -2   9 3294.45   85.79   2
  -1  -2   9 3252.91   88.55   1
   0   2  -9 886.832  23.858   3
   0   2  -9 894.495  26.428   1
   0  -2   9 907.916  26.283   1
  -1   2  -9 480.392  16.078   1
  -1   2  -9 491.529  13.931   3
   1  -2   9 500.104  16.130   1
  -2   2  -9 1180.80   34.46   1
   2  -2   9 1111.48   33.93   1
   2  -2   9 1142.27   31.38   4
  -3   2  -9 23.8166  1.7002   2
  -3   2  -9 23.7257  4.3185   1
   3  -2   9 24.6747  2.4257   4
   3  -2   9 26.5682  3.4068   1
  -4   2  -9 4.56261 1.67518   2
  -4   2  -9 -3.6752  4.0162   1
   4  -2   9 2.41750 1.52039   4
  -5   2  -9 0.85746 2.15666   2
  -5   2  -9 -5.0163  3.7693   1
  -6   2  -9 11.2190  5.0783   1
  -7   2  -9 -8.3737  5.6105   1
  -7  -1   9 15.9526  4.7387   2
  -6  -1   9 1.59069 3.09034   4
  -6  -1   9 3.52119 4.66888   3
  -5  -1   9 73.5231  5.9014   2
  -5  -1   9 86.9862  6.4520   3
  -5  -1   9 83.4753  5.5564   4
  -4  -1   9 164.973   8.184   2
  -4  -1   9 165.054   8.002   3
  -4  -1   9 182.547   7.953   4
  -3  -1   9 165.409   7.259   3
  -3  -1   9 167.735   7.597   2
   2   1  -9 126.288   4.828   1
   2   1  -9 121.174   5.488   3
   2   1  -9 121.440   4.700   1
  -2  -1   9 117.083   5.566   3
  -2  -1   9 125.414   5.936   2
   1   1  -9 134.585  85.341   1
   1   1  -9 132.385  16.128   3
  -1  -1   9 142.754   9.408   1
  -1  -1   9 137.125   5.626   3
  -1  -1   9 136.805  16.184   2
   0   1  -9 1269.33   34.24   3
   0   1  -9 1316.11   36.65   1
   0  -1   9 1276.33   33.61   2
   0  -1   9 1251.59   36.33   1
  -1   1  -9 3899.09  103.44   3
  -1   1  -9 4023.40  108.57   1
   1  -1   9 4002.80  108.33   1
  -2   1  -9 41.6655  4.4391   1
   2  -1   9 60.8495  4.6152   1
  -3   1  -9 285.352  11.690   1
  -3   1  -9 276.847   8.277   2
   3  -1   9 288.285  11.589   1
  -4   1  -9 197.744   7.065   2
  -4   1  -9 196.087   9.955   1
   4  -1   9 210.530   6.633   4
   4  -1   9 204.570   6.638   4
  -5   1  -9 111.802   5.475   2
  -5   1  -9 106.047   7.577   1
  -6   1  -9 41.1394  6.2552   1
  -7   0   9 10.2549  4.6306   2
  -6   0   9 2.11248 3.84468   2
  -6   0   9 4.63024 2.76166   4
  -6   0   9 -6.2296  4.9238   3
  -5   0   9 22.2298  3.5570   4
  -5   0   9 15.7289  3.7891   3
  -4   0   9 17.9151  4.1898   3
   3   0  -9 683.269  20.619   3
   3   0  -9 686.209  19.317   1
   3   0  -9 678.962  19.259   1
  -3   0   9 681.250  20.631   3
   2   0  -9 1342.84   35.60   3
   2   0  -9 1295.76   35.95   1
   2   0  -9 1280.14   35.84   1
  -2   0   9 1236.05   35.44   3
   1   0  -9 1147.85   31.69   3
   1   0  -9 1190.02   33.04   1
   1   0  -9 1167.55   32.85   1
  -1   0   9 1126.69   31.68   3
   0   0  -9 8.76550 2.83866   1
   0   0  -9 14.1795  1.8839   3
   0   0   9 13.0321  2.3916   1
  -1   0  -9 62.8350  3.8390   3
  -1   0  -9 58.3094  4.4008   1
   1   0   9 63.0230  4.1125   1
  -2   0  -9 71.2705  5.1910   1
   2   0   9 75.8849  4.7654   1
  -3   0  -9 8.88820 2.71283   1
   3   0   9 11.9540  3.3375   1
  -4   0  -9 124.884   5.342   2
  -4   0  -9 120.952   7.662   1
   4   0   9 137.400   5.128   4
  -5   0  -9 26.0090  5.3056   1
  -5   0  -9 20.4651  3.0418   2
  -6   0  -9 34.7767  5.9171   1
  -7   1   9 19.4140  5.3181   2
  -7   1   9 17.5044  6.3963   3
  -6   1   9 143.832   9.228   3
  -6   1   9 117.973   6.609   4
  -5   1   9 341.144  14.111   3
   4  -1  -9 17.4875  2.1905   1
   4  -1  -9 16.1760  3.9390   3
   4  -1  -9 16.9720  2.0639   1
  -4   1   9 17.6659  5.1049   3
   3  -1  -9 156.439   6.075   1
   3  -1  -9 153.887   6.984   3
   3  -1  -9 165.665   6.334   1
  -3   1   9 157.207   7.682   3
   2  -1  -9 10.7723  2.8663   3
   2  -1  -9 7.71685 2.12864   1
   2  -1  -9 7.54659 2.34786   1
  -2   1   9 6.43802 2.88095   3
   1  -1  -9 392.323  12.650   3
   1  -1  -9 408.068  13.409   1
   1  -1  -9 399.393  13.160   1
  -1   1   9 399.655  12.984   3
   0  -1  -9 194.581   7.543   3
   0  -1  -9 207.844   8.083   1
   0  -1  -9 186.153   8.096   1
  -1  -1  -9 334.483  12.350   1
  -1  -1  -9 340.463  11.402   3
   1   1   9 333.293  12.132   1
   1   1   9 335.056   9.631   2
  -2  -1  -9 21.0934  3.4345   1
   2   1   9 24.7781  1.9318   2
   2   1   9 28.3382  3.6608   1
  -3  -1  -9 213.915   9.783   1
   3   1   9 201.754   7.637   4
   3   1   9 211.564   9.400   1
  -4  -1  -9 3.90660 3.98073   1
   4   1   9 -1.6918  2.0818   4
  -5  -1  -9 77.0992  6.7613   1
  -6  -1  -9 15.9434  5.4614   1
  -7   2   9 16.2349  6.6225   3
  -6   2   9 45.8561  7.0231   3
   5  -2  -9 13.5155  2.4146   1
  -5   2   9 7.43779 2.42026   1
  -5   2   9 13.0926  4.1037   3
   4  -2  -9 254.062  10.739   3
   4  -2  -9 231.332   8.801   1
  -4   2   9 260.724  11.202   3
  -4   2   9 243.813   9.009   1
   3  -2  -9 344.333  12.390   3
   3  -2  -9 333.144  11.457   1
  -3   2   9 344.580  11.654   1
  -3   2   9 324.973  12.390   3
   2  -2  -9 142.577   6.237   1
   2  -2  -9 142.047   6.793   3
  -2   2   9 150.991   6.992   3
  -2   2   9 146.145   6.525   1
   1  -2  -9 58.5333  4.4950   1
   1  -2  -9 65.8363  4.0529   3
   1  -2  -9 68.5449  5.0903   1
  -1   2   9 57.4044  5.2179   3
   0  -2  -9 2183.73   59.28   3
   0  -2  -9 2218.38   61.77   1
   0  -2  -9 2196.70   61.63   1
  -1  -2  -9 1082.78   32.42   1
  -1  -2  -9 1097.43   31.14   3
  -1  -2  -9 1069.28   32.53   1
  -2  -2  -9 58.2955  5.4570   1
  -2  -2  -9 58.0002  4.5400   1
   2   2   9 65.0144  4.4542   4
   2   2   9 64.1726  3.5239   2
  -3  -2  -9 30.4077  4.5965   1
   3   2   9 27.2061  3.3743   4
  -4  -2  -9 6.98165 4.27371   1
   4   2   9 6.14454 2.76778   4
  -5  -2  -9 160.829   9.574   1
  -6  -2  -9 3.96416 3.70268   1
  -7   3   9 22.0069  6.5606   3
  -6   3   9 35.3086  3.6240   1
  -6   3   9 42.1504  6.5731   3
   5  -3  -9 13.5108  2.9821   1
  -5   3   9 21.1574  3.3356   1
  -5   3   9 23.5856  5.4704   3
   4  -3  -9 30.3299  3.7196   1
  -4   3   9 44.7664  6.2741   3
  -4   3   9 29.1220  4.1040   1
   3  -3  -9 67.8997  4.8922   1
   3  -3  -9 79.2741  5.7640   3
  -3   3   9 66.0397  4.9979   1
  -3   3   9 64.6230  6.0461   3
   2  -3  -9 127.342   6.588   1
   2  -3  -9 131.849   6.820   3
  -2   3   9 131.408   6.462   1
  -2   3   9 139.247   7.209   3
   1  -3  -9 -1.4917  2.8476   1
   1  -3  -9 2.77038 2.18215   3
  -1   3   9 0.29021 3.64888   3
  -1   3   9 -4.6589  3.2293   1
   0  -3  -9 60.8130  4.6043   3
   0  -3  -9 53.2488  4.2752   1
   0  -3  -9 55.1649  5.4415   1
  -1  -3  -9 702.323  21.376   3
  -1  -3  -9 682.119  22.471   1
  -1  -3  -9 660.005  22.082   1
   1   3   9 680.137  20.761   4
  -2  -3  -9 1.06333 2.71127   3
  -2  -3  -9 5.05059 3.44171   1
   2   3   9 0.87164 2.44553   2
   2   3   9 1.25295 3.34943   4
  -3  -3  -9 1.69851 3.73465   1
   3   3   9 4.34591 2.73054   2
   3   3   9 8.36169 3.25589   4
   4   3   9 10.2118  3.5147   4
  -5  -3  -9 64.4502  6.0934   1
  -7   4   9 19.8117  6.5201   3
  -6   4   9 2.64163 2.93605   1
  -6   4   9 -2.4920  5.6847   3
   5  -4  -9 -1.2354  3.1847   1
  -5   4   9 -2.3037  2.5648   1
  -5   4   9 -3.8662  5.1017   3
   4  -4  -9 310.337  12.122   1
  -4   4   9 319.939  12.369   1
  -4   4   9 314.332  13.565   3
   3  -4  -9 199.513   8.920   1
   3  -4  -9 191.893   9.369   3
  -3   4   9 185.146   9.089   1
  -3   4   9 204.182   9.473   3
   2  -4  -9 5.41732 3.74931   3
   2  -4  -9 7.38261 3.48893   1
  -2   4   9 14.0846  4.7260   3
  -2   4   9 3.56063 3.75700   1
   1  -4  -9 249.911  10.424   1
   1  -4  -9 242.794   9.963   3
  -1   4   9 225.257   9.613   4
  -1   4   9 249.471  10.620   1
  -1   4   9 239.165  10.310   3
   0  -4  -9 176.278   8.460   1
   0  -4  -9 188.181   8.595   3
   0   4   9 189.208   8.556   4
   0   4   9 200.030   9.565   1
  -1  -4  -9 17.5714  4.2352   1
  -1  -4  -9 11.3467  4.6586   1
  -1  -4  -9 15.8354  3.3196   3
   1   4   9 15.0390  4.2772   4
  -2  -4  -9 580.640  20.637   1
   2   4   9 597.320  18.613   2
   2   4   9 583.353  19.022   4
  -3  -4  -9 50.2638  5.1691   1
   3   4   9 45.8791  4.8799   4
   3   4   9 46.7644  4.3863   2
  -4  -4  -9 2.75278 3.44471   1
  -5  -4  -9 10.3272  4.7462   1
  -6   5   9 3.41743 3.76311   1
  -6   5   9 1.32290 5.20530   3
  -5   5   9 96.0006  7.6155   3
  -5   5   9 99.8363  6.8622   1
  -4   5   9 1.32632 3.77780   3
  -4   5   9 4.25596 4.30365   1
   3  -5  -9 480.747  17.585   1
  -3   5   9 520.539  18.163   1
  -3   5   9 502.768  18.249   3
   2  -5  -9 295.757  12.473   1
  -2   5   9 285.415  12.520   3
  -2   5   9 313.235  12.890   1
  -1   5   9 36.8061  4.4780   1
   0   5   9 340.544  14.270   1
  -1  -5  -9 153.816   9.534   1
  -2  -5  -9 72.4699  7.3403   1
   2   5   9 70.6409  5.1808   2
  -3  -5  -9 0.30856 5.11170   1
  -4  -5  -9 42.1128  6.4623   1
  -5  -5  -9 28.0334  6.3834   1
  -6   6   9 -5.3356  3.4664   1
  -6   6   9 1.50337 6.09041   3
  -5   6   9 -4.0297  6.1329   3
  -5   6   9 3.90248 4.38504   1
  -4   6   9 17.7142  5.1848   1
  -4   6   9 25.4135  6.3294   3
  -3   6   9 3.39066 5.00647   1
  -3   6   9 -1.3722  5.4865   3
  -2   6   9 1.52058 4.33239   3
  -2   6   9 3.99960 4.84997   1
  -1   6   9 791.174  25.853   3
  -1   6   9 823.745  27.457   1
   0   6   9 0.51552 4.95821   1
  -1  -6  -9 241.731  12.332   1
  -2  -6  -9 475.677  19.570   1
  -3  -6  -9 -1.3417  5.7100   1
  -4  -6  -9 21.4098  6.4521   1
  -6   7   9 -1.1446  4.6942   1
  -6   7   9 7.00080 6.83359   3
  -5   7   9 17.9547  5.5674   1
  -5   7   9 25.6272  6.7835   3
  -4   7   9 -8.1172  6.0586   3
  -4   7   9 4.54572 5.02820   1
  -3   7   9 36.5467  6.3949   3
  -3   7   9 27.8234  5.8941   1
  -2   7   9 10.3584  5.3601   1
  -2   7   9 10.0125  4.4127   3
  -1   7   9 72.3293  7.4896   1
   0   7   9 43.3164  6.0894   1
  -1  -7  -9 44.8615  7.2257   1
  -2  -7  -9 141.490  10.511   1
  -3  -7  -9 47.2017  7.6969   1
  -5   8   9 16.0678  5.2690   3
  -4   8   9 -0.6201  4.9618   1
  -4   8   9 4.22167 6.16140   3
  -3   8   9 26.0487  6.2430   1
  -3   8   9 25.0685  7.1071   3
  -2   8   9 30.2477  6.2035   1
  -2   8   9 24.8700  6.7413   3
  -1   8   9 6.42002 5.98087   1
   0   8   9 67.8985  7.8700   1
  -1  -8  -9 162.920  11.623   1
  -2  -8  -9 28.1791  7.5904   1
  -4   9   9 37.9128  7.6243   1
  -3   9   9 -0.5301  6.5037   3
  -3   9   9 10.8333  6.0946   1
  -2   9   9 47.3738  7.9144   1
  -1   9   9 38.2349  7.3762   1
   0   9   9 43.7408  8.4386   1
  -1  10 -10 -2.9523  5.9654   1
  -2  10 -10 9.31485 5.24416   1
   2 -10  10 -5.0026  5.5278   4
   2   9 -10 152.382   9.040   1
   1   9 -10 112.375   8.676   1
  -1  -9  10 109.371   8.476   4
   0   9 -10 56.6180  7.1595   1
  -1   9 -10 -1.0905  5.6975   1
   1  -9  10 0.22462 4.09702   4
  -2   9 -10 24.4150  5.4833   1
  -3   9 -10 45.1657  7.8274   1
  -4   9 -10 25.8246  7.6422   1
   4  -9  10 20.4417  4.9768   4
   2   8 -10 4.41410 4.12792   1
   1   8 -10 50.0383  5.8672   1
  -1   8 -10 7.39063 5.32969   1
  -2   8 -10 25.3485  4.9982   1
  -3   8 -10 0.57473 7.44565   1
   3  -8  10 9.51707 5.72496   4
  -4   8 -10 0.50990 5.60150   1
   4  -8  10 -1.1475  3.7444   4
  -5   8 -10 13.2198  6.7013   1
   3   7 -10 11.3876  3.0042   1
   2   7 -10 400.155  14.468   1
  -2  -7  10 395.433  16.201   4
   1   7 -10 89.1177  6.7998   1
  -1  -7  10 81.7077  5.5414   1
   0   7 -10 32.6488  4.5393   1
  -1   7 -10 322.160  13.958   1
  -1   7 -10 327.653  12.356   2
  -2   7 -10 387.951  14.443   2
  -2   7 -10 435.729  17.286   1
   2  -7  10 423.089  15.414   4
  -3   7 -10 137.522   5.309   3
  -3   7 -10 138.407   9.817   1
   3  -7  10 152.469   8.231   4
  -4   7 -10 4.57614 2.64717   3
  -4   7 -10 -0.4623  4.7359   1
   4  -7  10 -0.9180  3.0521   4
  -5   7 -10 13.7143  5.2900   1
  -5  -6  10 3.78708 5.89768   2
  -5  -6  10 8.72566 5.50244   4
  -4  -6  10 59.8476  5.0114   3
   3   6 -10 -0.2722  2.2463   1
  -3  -6  10 1.96865 4.98481   4
   2   6 -10 145.897   6.892   1
  -2  -6  10 144.908   6.711   1
  -2  -6  10 137.304   5.219   3
   1   6 -10 365.007  13.741   2
   1   6 -10 381.674  13.699   1
  -1  -6  10 367.951  13.443   1
  -1  -6  10 356.160  14.141   4
   0   6 -10 111.589   6.557   1
   0   6 -10 117.377   6.455   2
   0  -6  10 114.672   7.587   4
   0  -6  10 106.338   6.211   1
  -1   6 -10 176.615   7.852   2
  -1   6 -10 190.268   9.456   1
   1  -6  10 181.156   8.892   4
  -2   6 -10 78.4972  6.7916   1
   2  -6  10 90.4309  7.0216   4
  -3   6 -10 11.6346  2.1567   3
  -3   6 -10 8.36566 3.92457   1
   3  -6  10 14.7611  4.0264   4
  -4   6 -10 9.15371 5.44329   1
  -4   6 -10 1.29004 2.63933   3
   4  -6  10 5.68722 3.37965   4
  -5   6 -10 33.9726  4.5469   3
  -5   6 -10 21.0379  4.8140   1
  -6   6 -10 7.42129 4.38007   3
  -6   6 -10 4.14241 5.98471   1
  -5  -5  10 9.83930 5.06860   4
  -5  -5  10 1.16017 3.93178   3
  -5  -5  10 16.4284  5.8884   2
  -4  -5  10 84.9612  5.6076   3
  -4  -5  10 64.0861  6.0251   2
  -4  -5  10 63.7985  6.5553   4
   3   5 -10 68.4762  3.7500   1
  -3  -5  10 72.8815  4.4383   3
  -3  -5  10 65.2060  3.4632   1
  -3  -5  10 78.5657  6.9699   2
   2   5 -10 838.024  24.906   1
   2   5 -10 825.200  25.795   2
  -2  -5  10 820.581  25.998   4
  -2  -5  10 825.614  22.978   3
  -2  -5  10 855.269  24.756   1
   1   5 -10 19.1336  3.4834   1
   1   5 -10 14.7639  3.2923   2
  -1  -5  10 26.0928  3.3376   1
  -1  -5  10 18.7784  4.8278   4
   0   5 -10 334.201  12.825   1
   0   5 -10 347.288  11.755   2
   0  -5  10 338.442  12.582   1
   0  -5  10 340.927  13.051   4
  -1   5 -10 332.781  13.015   1
  -1   5 -10 312.891  10.757   2
   1  -5  10 315.757  12.466   1
   1  -5  10 310.658  11.905   4
  -2   5 -10 62.3417  5.4826   1
   2  -5  10 69.7255  4.7728   4
  -3   5 -10 528.770  16.104   3
  -3   5 -10 551.249  20.287   1
   3  -5  10 555.800  17.293   4
  -4   5 -10 195.895   8.260   3
  -4   5 -10 191.211  10.932   1
   4  -5  10 200.828   7.873   4
  -5   5 -10 24.7283  4.9582   1
  -5   5 -10 21.3084  3.9591   3
  -6   5 -10 -2.5122  4.3118   3
  -6   5 -10 3.55393 4.74496   1
  -6  -4  10 40.9522  5.6439   4
  -6  -4  10 30.7334  5.9832   3
  -5  -4  10 -1.4900  4.2850   4
  -5  -4  10 -1.5107  3.4445   2
  -5  -4  10 1.27844 3.30959   3
  -4  -4  10 83.7377  7.0785   2
  -4  -4  10 75.1917  6.5496   4
  -4  -4  10 79.9172  5.5466   3
  -3  -4  10 356.674  12.037   3
  -3  -4  10 358.123  14.148   4
  -3  -4  10 366.953  14.388   2
   2   4 -10 40.6235  3.1598   1
  -2  -4  10 40.2904  4.0007   2
  -2  -4  10 44.1930  4.5389   4
  -2  -4  10 39.5167  2.8707   1
  -2  -4  10 41.9732  2.6448   3
   1   4 -10 4.20040 2.50135   1
  -1  -4  10 2.63555 2.91790   4
  -1  -4  10 3.55340 2.14627   1
   0   4 -10 12.9379  2.3022   2
   0   4 -10 8.28851 2.97741   1
   0  -4  10 10.2203  2.7489   1
   0  -4  10 8.86985 2.96395   4
  -1   4 -10 1016.71   27.85   2
  -1   4 -10 1019.31   30.95   1
   1  -4  10 1004.83   29.22   4
   1  -4  10 999.789  30.635   1
  -2   4 -10 24.9347  5.1675   1
  -2   4 -10 12.5930  1.8118   3
   2  -4  10 10.7006  3.7639   4
   2  -4  10 3.53586 3.98423   1
  -3   4 -10 142.622   6.433   3
  -3   4 -10 159.343   9.680   1
   3  -4  10 146.490   6.894   4
  -4   4 -10 24.1573  4.6063   1
  -4   4 -10 22.6941  3.8531   3
   4  -4  10 23.9969  2.8425   4
  -5   4 -10 36.1207  4.8115   3
  -5   4 -10 42.0617  5.4156   1
  -6   4 -10 40.8110  7.0584   1
  -6   4 -10 36.7648  5.8356   3
  -6  -3  10 68.0870  6.3312   4
  -6  -3  10 57.2013  6.5948   3
  -6  -3  10 57.7304  6.3448   2
  -5  -3  10 0.10607 4.67818   2
  -5  -3  10 -4.9070  4.0682   3
  -5  -3  10 -1.9570  3.7147   4
  -4  -3  10 195.084   8.770   3
  -4  -3  10 179.804   8.887   4
  -4  -3  10 204.289  10.257   2
  -3  -3  10 447.446  15.893   2
  -3  -3  10 434.465  14.199   3
  -3  -3  10 454.104  15.856   4
   2   3 -10 27.5895  2.4137   1
  -2  -3  10 32.4967  4.5298   4
  -2  -3  10 29.2042  2.3955   3
  -2  -3  10 25.5998  3.6182   2
  -2  -3  10 27.0283  2.2040   1
   1   3 -10 227.204   8.519   1
  -1  -3  10 227.609   8.499   2
  -1  -3  10 228.957   6.815   3
  -1  -3  10 236.264   8.455   1
  -1  -3  10 224.338   9.404   4
   0   3 -10 207.484   8.538   1
   0   3 -10 203.488   7.077   2
   0  -3  10 219.413   8.557   1
   0  -3  10 201.578   8.644   4
  -1   3 -10 417.447  14.504   1
  -1   3 -10 394.259  11.487   2
  -1   3 -10 399.941  11.257   3
   1  -3  10 390.920  13.202   4
   1  -3  10 402.175  14.188   1
  -2   3 -10 1046.39   31.82   1
  -2   3 -10 1010.83   27.38   2
   2  -3  10 1024.92   31.56   1
   2  -3  10 1056.33   29.15   4
  -3   3 -10 918.744  29.695   1
   3  -3  10 941.530  26.083   4
  -4   3 -10 168.241   9.783   1
   4  -3  10 168.051   6.168   4
  -5   3 -10 14.7337  5.1213   1
  -5   3 -10 16.6001  2.5577   2
  -6   3 -10 10.9893  5.6052   1
  -7  -2  10 76.7191  7.8930   3
  -7  -2  10 55.8758  6.7262   2
  -6  -2  10 26.9058  4.5195   4
  -6  -2  10 27.8415  6.0149   2
  -6  -2  10 32.5018  5.6295   3
  -5  -2  10 109.329   6.309   4
  -5  -2  10 103.905   7.520   2
  -5  -2  10 107.463   7.027   3
  -4  -2  10 105.573   6.211   3
  -4  -2  10 102.388   6.608   4
  -4  -2  10 104.142   7.128   2
  -3  -2  10 93.8321  6.1366   4
  -3  -2  10 98.7660  5.2621   3
  -3  -2  10 92.7531  6.1440   2
   2   2 -10 582.873  16.714   1
  -2  -2  10 553.951  17.646   2
  -2  -2  10 573.724  16.664   3
  -2  -2  10 553.818  16.547   1
  -2  -2  10 577.909  18.110   4
   1   2 -10 274.267  14.064   1
   1   2 -10 268.745   8.353   3
  -1  -2  10 275.042   8.426   3
  -1  -2  10 267.174   9.361   1
  -1  -2  10 275.111   9.395   2
   0   2 -10 487.926  16.162   1
   0   2 -10 505.720  14.034   3
   0  -2  10 512.601  16.149   1
  -1   2 -10 -4.8403  3.3708   1
  -1   2 -10 -2.8751  1.6877   3
   1  -2  10 -0.9499  1.9854   1
  -2   2 -10 597.388  20.380   1
   2  -2  10 630.841  18.515   4
   2  -2  10 641.934  20.664   1
  -3   2 -10 14.0036  3.3603   1
   3  -2  10 12.7813  4.0745   1
   3  -2  10 8.93863 2.20297   4
  -4   2 -10 137.833   8.704   1
  -4   2 -10 143.979   5.238   2
   4  -2  10 143.236   5.332   4
  -5   2 -10 185.345  10.443   1
  -5   2 -10 165.332   6.722   2
  -6   2 -10 4.52744 5.10428   1
  -7  -1  10 -2.4072  5.0196   3
  -7  -1  10 5.76856 4.43907   2
  -6  -1  10 33.9094  6.3420   2
  -6  -1  10 31.2026  4.0608   4
  -6  -1  10 31.1426  4.6051   3
  -5  -1  10 10.6529  3.6545   2
  -5  -1  10 11.4378  3.9573   4
  -5  -1  10 0.35270 3.98601   3
  -4  -1  10 7.87486 2.89726   4
  -4  -1  10 15.2741  3.4908   2
  -4  -1  10 15.2225  3.4159   3
  -3  -1  10 202.183   8.327   3
  -3  -1  10 199.429   8.947   2
   2   1 -10 1946.74   53.15   3
   2   1 -10 2014.13   54.50   1
   2   1 -10 2006.38   54.36   1
  -2  -1  10 2003.02   53.33   3
  -2  -1  10 1978.72   53.85   2
   1   1 -10 9.12645 2.01098   3
   1   1 -10 6.88252 2.36788   1
  -1  -1  10 7.39545 1.63897   2
  -1  -1  10 10.9453  2.0820   1
  -1  -1  10 9.97603 2.18998   3
   0   1 -10 34.0125  2.6552   3
   0   1 -10 37.8444  3.8107   1
   0  -1  10 33.8139  3.2996   2
   0  -1  10 36.3757  3.2477   1
  -1   1 -10 36.0559 10.7491   3
  -1   1 -10 43.1736  7.8756   1
   1  -1  10 27.3808  3.6022   1
  -2   1 -10 17.0485  3.0788   1
   2  -1  10 15.1373  2.6918   1
  -3   1 -10 -3.8564  2.7848   1
   3  -1  10 5.89875 3.55999   1
  -4   1 -10 94.7351  4.0755   2
  -4   1 -10 98.8406  6.9527   1
  -5   1 -10 87.2796  4.6116   2
  -5   1 -10 96.2184  8.0154   1
  -6   1 -10 0.54722 4.13631   1
  -7   0  10 14.7179  4.7545   2
  -7   0  10 9.66046 6.02964   3
  -6   0  10 -2.6956  4.0333   3
  -6   0  10 -3.3612  3.8529   2
  -6   0  10 11.2936  3.6053   4
  -5   0  10 140.676   7.014   4
  -5   0  10 136.447   8.254   3
  -4   0  10 151.658   7.990   3
   3   0 -10 253.849   8.233   1
   3   0 -10 258.390   9.855   3
   3   0 -10 247.060   8.272   1
  -3   0  10 257.307   9.965   3
   2   0 -10 579.907  17.563   3
   2   0 -10 592.268  17.667   1
   2   0 -10 593.827  17.522   1
  -2   0  10 571.780  17.737   3
   1   0 -10 91.0415  4.6556   1
   1   0 -10 84.1420  4.2006   3
   1   0 -10 90.7973  4.9025   1
  -1   0  10 86.5772  4.5643   3
   0   0 -10 497.903  14.948   3
   0   0 -10 490.121  16.123   1
   0   0  10 500.702  15.992   1
  -1   0 -10 0.17139 2.45809   1
  -1   0 -10 4.72418 1.79041   3
   1   0  10 6.32994 2.52165   1
  -2   0 -10 9.30458 3.50944   1
   2   0  10 5.08146 2.75904   1
  -3   0 -10 179.365   8.808   1
   3   0  10 184.804   8.721   1
  -4   0 -10 258.334  11.960   1
   4   0  10 257.512   8.652   4
  -5   0 -10 87.2018  4.8964   2
  -5   0 -10 83.7995  7.4737   1
  -6   0 -10 24.6306  5.7832   1
  -7   1  10 8.94012 6.29388   3
  -7   1  10 -0.2706  5.5060   2
  -6   1  10 10.9531  3.8084   4
  -6   1  10 10.6320  4.3104   3
  -5   1  10 174.461   9.652   3
   4  -1 -10 576.447  16.517   1
   4  -1 -10 531.052  18.030   3
   4  -1 -10 523.616  16.105   1
  -4   1  10 551.634  18.844   3
   3  -1 -10 324.194  11.783   3
   3  -1 -10 326.432  10.730   1
   3  -1 -10 330.542  10.940   1
  -3   1  10 326.565  12.084   3
   2  -1 -10 12.5927  2.6689   1
   2  -1 -10 11.7560  2.9969   3
   2  -1 -10 12.6819  1.9788   1
  -2   1  10 12.5955  3.5633   3
   1  -1 -10 2650.29   70.57   3
   1  -1 -10 2685.50   73.19   1
   1  -1 -10 2656.94   72.98   1
  -1   1  10 2611.69   70.68   3
   0  -1 -10 1009.48   30.29   1
   0  -1 -10 1024.98   28.77   3
   0  -1 -10 1009.58   30.08   1
  -1  -1 -10 284.112  10.097   3
  -1  -1 -10 274.131  10.584   1
  -1  -1 -10 272.723  10.881   1
   1   1  10 265.711   7.935   2
   1   1  10 255.259  10.326   1
  -2  -1 -10 52.9615  5.1818   1
   2   1  10 59.5663  4.8803   1
  -3  -1 -10 2.85433 4.10282   1
   3   1  10 1.54611 2.32152   4
  -4  -1 -10 3.94245 4.13681   1
   4   1  10 6.16998 2.35297   4
  -5  -1 -10 24.4419  5.3763   1
  -6  -1 -10 1.38301 4.54819   1
  -6   2  10 35.8305  6.4033   3
   5  -2 -10 10.5616  2.4244   1
  -5   2  10 9.24230 5.50211   3
  -5   2  10 9.01146 2.41661   1
   4  -2 -10 112.712   5.468   1
  -4   2  10 102.585   7.672   3
  -4   2  10 111.604   5.531   1
   3  -2 -10 17.3435  3.0008   3
   3  -2 -10 9.54313 2.83066   1
  -3   2  10 11.0734  2.8387   1
  -3   2  10 16.0373  3.4364   3
   2  -2 -10 378.777  12.965   3
   2  -2 -10 385.781  13.106   1
   2  -2 -10 380.448  13.364   1
  -2   2  10 373.456  13.334   3
   1  -2 -10 21.8722  3.4445   1
   1  -2 -10 17.6820  3.8835   1
   1  -2 -10 25.8611  3.1796   3
  -1   2  10 25.4480  3.3596   3
   0  -2 -10 0.85441 7.29716   1
  -1  -2 -10 41.9388  4.2444   3
  -1  -2 -10 38.5441  4.6023   1
  -1  -2 -10 32.6094  3.8896   1
  -2  -2 -10 198.230   8.821   3
  -2  -2 -10 188.608   8.986   1
  -2  -2 -10 187.905   9.001   1
   2   2  10 191.391   8.105   4
   2   2  10 192.671   6.857   2
  -3  -2 -10 31.7787  4.9001   1
   3   2  10 29.9267  3.1677   4
  -4  -2 -10 -0.3242  4.1245   1
   4   2  10 5.42059 2.55745   4
  -5  -2 -10 29.5698  5.8335   1
  -6  -2 -10 14.2102  4.6244   1
  -7   3  10 9.86060 6.46492   3
  -6   3  10 1.08526 5.52328   3
   5  -3 -10 3.65027 2.70867   1
  -5   3  10 2.94448 2.90049   1
  -5   3  10 2.25454 4.85448   3
   4  -3 -10 717.029  22.892   1
  -4   3  10 758.025  23.237   1
  -4   3  10 752.127  24.135   3
   3  -3 -10 25.3693  3.6253   1
   3  -3 -10 23.1658  4.0949   3
  -3   3  10 29.2130  4.9620   3
  -3   3  10 22.6419  3.1654   1
   2  -3 -10 98.8411  5.9876   1
   2  -3 -10 99.8812  6.1745   3
  -2   3  10 112.924   6.390   1
  -2   3  10 94.6793  5.8389   3
   1  -3 -10 742.195  23.466   1
   1  -3 -10 734.293  23.199   1
   1  -3 -10 748.802  22.534   3
  -1   3  10 709.412  22.702   3
   0  -3 -10 606.564  19.648   3
   0  -3 -10 631.810  20.701   1
   0  -3 -10 635.440  21.007   1
  -1  -3 -10 100.548   6.372   3
  -1  -3 -10 101.579   6.105   1
  -1  -3 -10 102.140   7.021   1
   1   3  10 95.7232  6.1000   4
  -2  -3 -10 19.3550  4.4975   1
   2   3  10 22.8015  3.0595   2
   2   3  10 20.4310  3.8226   4
  -3  -3 -10 33.6308  5.2425   1
   3   3  10 28.9860  3.3082   2
   3   3  10 26.6965  3.9076   4
  -4  -3 -10 154.102   9.544   1
  -5  -3 -10 37.9699  6.3178   1
  -7   4  10 -0.3252  6.0527   3
  -6   4  10 4.52153 5.34497   3
  -6   4  10 1.91197 3.25714   1
   5  -4 -10 18.8735  3.4108   1
  -5   4  10 7.06337 5.62353   3
  -5   4  10 14.4700  3.8963   1
   4  -4 -10 131.633   7.320   1
  -4   4  10 133.133   7.993   1
  -4   4  10 134.112   9.476   3
   3  -4 -10 46.9857  4.9866   1
  -3   4  10 46.9573  4.6056   1
  -3   4  10 47.1183  6.3139   3
   2  -4 -10 169.577   8.257   1
   2  -4 -10 167.062   8.327   3
  -2   4  10 165.210   8.786   1
  -2   4  10 180.457   9.036   3
   1  -4 -10 21.6301  4.2581   1
   1  -4 -10 23.1620  3.3785   3
  -1   4  10 20.5566  4.3571   3
  -1   4  10 17.4787  3.4331   1
   0  -4 -10 19.0155  4.0595   1
   0  -4 -10 24.3871  3.5338   3
   0  -4 -10 17.0152  4.1410   1
   0   4  10 26.3759  4.2156   4
  -1  -4 -10 70.3759  6.6091   1
   1   4  10 65.8767  5.5768   4
  -2  -4 -10 1.73193 3.69779   1
   2   4  10 4.19009 3.82602   4
   3   4  10 16.7771  3.7351   2
  -4  -4 -10 8.56912 5.34741   1
  -5  -4 -10 75.9738  7.9649   1
  -6   5  10 7.93916 6.06925   3
  -6   5  10 9.88145 4.28133   1
  -5   5  10 61.8697  6.1020   1
  -5   5  10 69.6962  7.8876   3
  -4   5  10 79.5390  6.6613   3
  -4   5  10 88.0632  6.9665   1
  -3   5  10 165.086   9.614   3
  -3   5  10 156.518   8.697   1
  -2   5  10 30.5972  5.8256   3
  -2   5  10 31.1020  5.0382   1
  -1   5  10 33.3554  5.6697   1
   0   5  10 218.880  11.275   1
  -1  -5 -10 735.582  25.196   1
   1   5  10 730.186  22.721   2
  -2  -5 -10 46.3128  6.5733   1
   2   5  10 41.3310  4.6628   2
  -3  -5 -10 183.541  10.930   1
  -4  -5 -10 6.63676 4.04969   1
  -6   6  10 1.73652 4.17943   1
  -6   6  10 7.68130 6.59038   3
  -5   6  10 64.4924  8.1691   3
  -5   6  10 73.4951  7.1779   1
  -4   6  10 54.1812  6.3063   1
  -4   6  10 60.7262  7.5414   3
  -3   6  10 18.8096  5.9292   3
  -3   6  10 13.6060  5.2004   1
  -2   6  10 40.7028  6.0720   1
  -2   6  10 27.5060  6.2543   3
  -1   6  10 69.1685  6.6615   1
   0   6  10 56.4957  5.8185   1
  -1  -6 -10 4.04775 4.43690   1
  -2  -6 -10 5.50135 5.93245   1
  -3  -6 -10 110.499   9.045   1
  -4  -6 -10 58.1682  6.6124   1
  -5   7  10 9.14852 5.67053   1
  -5   7  10 6.76514 6.39684   3
  -4   7  10 4.17173 4.45335   3
  -4   7  10 -6.0283  4.9221   1
  -3   7  10 35.3698  7.0488   3
  -3   7  10 45.6536  6.9641   1
  -2   7  10 23.1145  6.4665   3
  -2   7  10 13.1313  5.7508   1
  -1   7  10 5.69446 5.16209   1
   0   7  10 57.0400  7.5496   1
  -1  -7 -10 167.985  11.179   1
  -2  -7 -10 14.2561  6.6410   1
  -3  -7 -10 6.95911 6.44359   1
  -5   8  10 34.9670  7.1133   1
  -4   8  10 32.6224  7.6278   3
  -4   8  10 27.7272  6.6531   1
  -3   8  10 52.2162  7.3485   1
  -3   8  10 35.3262  6.4298   3
  -2   8  10 52.1496  7.6563   1
  -2   8  10 36.3539  7.1235   3
  -1   8  10 103.931   8.999   1
   0   8  10 0.81989 6.07904   1
  -1  -8 -10 5.14489 7.43698   1
  -3   9  10 4.92694 6.66174   1
  -3   9  10 -2.7394  6.3889   3
  -2   9  10 -0.8971  4.8020   1
  -1   9  10 20.2631  6.7463   1
   0   9  10 233.367  14.455   1
  -1  10 -11 2.52949 6.13722   1
   1   9 -11 59.1411  7.1140   1
  -1  -9  11 79.0090  7.6294   4
  -1   9 -11 -3.9146  5.8649   1
   1  -9  11 22.7821  5.1093   4
  -2   9 -11 5.38184 5.76665   1
   2  -9  11 9.36436 5.67753   4
  -3   9 -11 9.73933 6.99118   1
   3  -9  11 8.81493 5.54690   4
   2   8 -11 47.2240  5.6063   1
   0  -8  11 5.63619 5.87691   4
  -1   8 -11 22.3309  5.8639   1
  -2   8 -11 -3.4119  4.2126   1
   2  -8  11 2.25797 4.79566   4
  -3   8 -11 16.2672  6.8868   1
   3  -8  11 0.22356 4.67218   4
  -4   8 -11 25.2497  5.3767   1
   4  -8  11 5.79072 4.20060   4
  -4  -7  11 15.4501  5.7961   4
  -3  -7  11 11.0469  5.7043   4
   2   7 -11 -0.0270  4.0208   1
  -2  -7  11 11.6162  5.9535   4
   1   7 -11 186.271   9.332   1
  -1  -7  11 184.643   9.051   1
   0   7 -11 2.92358 4.51459   1
   0  -7  11 7.58253 4.96576   4
  -1   7 -11 -6.0811  5.4538   1
   1  -7  11 9.58743 5.44628   4
  -2   7 -11 0.81556 5.54480   1
  -2   7 -11 3.00697 2.75316   2
   2  -7  11 -8.3230  4.6661   4
  -3   7 -11 0.36533 5.95184   1
   3  -7  11 0.19184 4.35891   4
  -4   7 -11 19.6330  4.8545   1
  -5  -6  11 30.2476  6.6880   4
  -5  -6  11 35.7051  7.1016   2
  -4  -6  11 28.4564  5.9210   4
   3   6 -11 202.546   7.850   1
  -3  -6  11 199.547   7.813   3
  -3  -6  11 222.434  11.432   4
   2   6 -11 240.971   9.758   1
  -2  -6  11 219.373   9.226   1
  -2  -6  11 258.266  12.109   4
   1   6 -11 2.43218 3.98538   1
   1   6 -11 -2.3572  3.7790   2
  -1  -6  11 1.95767 3.82649   4
   0   6 -11 279.017  10.650   2
   0   6 -11 277.781  11.687   1
   0  -6  11 266.621  11.483   4
   0  -6  11 256.944  11.151   1
  -1   6 -11 373.415  12.900   2
  -1   6 -11 366.261  14.930   1
   1  -6  11 381.063  14.305   4
  -2   6 -11 1.27191 2.11130   2
  -2   6 -11 -0.9096  3.6898   1
   2  -6  11 -3.1028  4.3740   4
  -3   6 -11 88.7055  7.6998   1
  -3   6 -11 97.4331  4.1835   3
   3  -6  11 102.712   6.523   4
  -4   6 -11 1.71613 3.48442   1
   4  -6  11 2.18189 2.90063   4
  -5   6 -11 68.5260  8.1093   1
  -5   6 -11 54.6332  4.8733   3
  -5  -5  11 125.474   7.408   3
  -5  -5  11 116.182   8.674   4
  -5  -5  11 115.637   9.279   2
  -4  -5  11 43.4319  5.9031   2
  -4  -5  11 51.6142  5.9904   4
  -4  -5  11 47.2374  4.6022   3
   3   5 -11 109.035   4.732   1
  -3  -5  11 122.268   7.988   2
  -3  -5  11 102.909   4.623   1
  -3  -5  11 118.362   5.424   3
  -3  -5  11 124.624   8.125   4
   2   5 -11 -4.2705  2.8074   1
   2   5 -11 1.11151 3.61964   2
  -2  -5  11 -1.7105  3.8868   4
  -2  -5  11 1.59262 1.31088   3
  -2  -5  11 1.80585 2.17958   1
   1   5 -11 73.2034  5.2518   1
   1   5 -11 83.6404  5.2252   2
  -1  -5  11 79.8741  6.5080   4
  -1  -5  11 69.8952  4.7485   1
   0   5 -11 541.413  16.970   2
   0   5 -11 561.144  18.593   1
   0  -5  11 537.610  18.473   4
   0  -5  11 534.757  18.106   1
  -1   5 -11 69.7649  4.1338   2
  -1   5 -11 79.7178  6.3763   1
   1  -5  11 64.3420  5.0589   4
   1  -5  11 54.0813  5.4544   1
  -2   5 -11 46.8958  5.2749   1
  -2   5 -11 37.3568  3.1406   2
   2  -5  11 38.5919  4.9295   4
   3  -5  11 17.0901  4.1768   4
  -4   5 -11 -3.1515  2.7431   3
  -4   5 -11 0.72695 5.42134   1
   4  -5  11 -3.2959  2.9361   4
  -5   5 -11 19.6298  6.1611   1
  -5   5 -11 22.7413  4.1923   3
  -6   5 -11 40.8732  5.3698   3
  -6   5 -11 33.1267  7.5274   1
  -6  -4  11 69.6226  6.8138   4
  -6  -4  11 65.5240  6.7662   3
  -6  -4  11 56.4771  7.6612   2
  -5  -4  11 31.0450  5.2665   4
  -5  -4  11 30.4536  4.7937   3
  -5  -4  11 25.2153  4.6840   2
  -4  -4  11 144.702   9.052   2
  -4  -4  11 156.085   8.946   4
  -4  -4  11 129.892   6.669   3
  -3  -4  11 310.423  13.172   4
  -3  -4  11 322.517  13.093   2
  -3  -4  11 306.142  10.717   3
   2   4 -11 1.40814 2.06146   1
  -2  -4  11 3.58280 1.81886   1
  -2  -4  11 -0.7232  1.3649   3
  -2  -4  11 2.32397 3.02782   4
  -2  -4  11 0.85650 2.50398   2
   1   4 -11 -0.1880  2.1669   2
   1   4 -11 1.34757 2.30597   1
  -1  -4  11 2.47860 2.12826   1
  -1  -4  11 -0.5665  2.8106   4
   0   4 -11 -0.0591  1.8960   2
   0   4 -11 3.60417 3.26075   1
   0  -4  11 1.00783 3.41003   4
   0  -4  11 0.11218 2.66935   1
  -1   4 -11 540.342  15.533   2
  -1   4 -11 545.832  18.588   1
   1  -4  11 519.191  17.350   4
   1  -4  11 522.236  18.126   1
  -2   4 -11 1709.68   45.41   2
  -2   4 -11 1689.58   50.37   1
  -2   4 -11 1734.08   45.38   3
   2  -4  11 1721.11   46.89   4
  -3   4 -11 881.101  25.461   3
  -3   4 -11 882.209  29.246   1
   3  -4  11 904.345  25.751   4
  -4   4 -11 63.4058  4.8997   3
  -4   4 -11 67.4327  7.0847   1
   4  -4  11 64.1537  4.0918   4
  -5   4 -11 48.5176  5.1462   3
  -5   4 -11 48.4854  6.9972   1
  -6   4 -11 9.48470 4.50711   3
  -6   4 -11 1.32898 5.76532   1
  -6  -3  11 34.3095  5.7729   3
  -6  -3  11 16.0717  4.2537   4
  -6  -3  11 22.7433  4.8579   2
  -5  -3  11 2.76568 4.31918   4
  -5  -3  11 2.91376 3.83411   3
  -5  -3  11 1.42078 4.59848   2
  -4  -3  11 292.207  11.351   3
  -4  -3  11 311.176  13.198   2
  -4  -3  11 295.911  12.365   4
  -3  -3  11 104.445   7.045   4
  -3  -3  11 97.4337  5.2378   3
  -3  -3  11 100.639   6.789   2
   2   3 -11 18.1618  2.3564   1
  -2  -3  11 18.1600  3.4452   2
  -2  -3  11 18.8846  4.2743   4
  -2  -3  11 20.5214  2.1608   3
  -2  -3  11 22.0097  2.1182   1
   1   3 -11 68.1949  4.0957   1
  -1  -3  11 70.4254  5.5417   4
  -1  -3  11 73.8673  2.9198   3
  -1  -3  11 73.1297  4.1908   1
  -1  -3  11 73.8488  4.4412   2
   0   3 -11 1048.26   31.42   1
   0  -3  11 1062.71   30.50   4
   0  -3  11 1064.79   31.31   1
  -1   3 -11 30.2586  2.0648   3
  -1   3 -11 37.9898  2.0172   2
  -1   3 -11 28.9563  4.7639   1
   1  -3  11 28.8607  4.1451   4
   1  -3  11 31.5098  4.1074   1
   2  -3  11 11.4503  4.1417   1
   2  -3  11 19.1811  4.2197   4
  -3   3 -11 304.716  13.378   1
   3  -3  11 300.148  10.649   4
  -4   3 -11 81.0872  7.0080   1
  -4   3 -11 79.2584  3.4554   2
   4  -3  11 83.7340  4.2362   4
  -5   3 -11 13.3820  5.4378   1
  -6   3 -11 1.22476 4.01273   1
  -6  -2  11 1.34653 5.09657   2
  -6  -2  11 13.2708  3.8664   3
  -6  -2  11 3.64508 4.13480   4
  -5  -2  11 5.03073 3.80341   4
  -5  -2  11 1.63345 3.26820   2
  -5  -2  11 -4.7009  4.1673   3
  -4  -2  11 125.635   7.753   2
  -4  -2  11 126.377   6.453   3
  -4  -2  11 117.349   7.374   4
  -3  -2  11 95.5475  6.2381   2
  -3  -2  11 87.6971  5.2501   3
  -3  -2  11 84.8104  5.7497   4
   2   2 -11 1.90999 1.95236   1
  -2  -2  11 5.50533 3.79313   4
  -2  -2  11 2.01299 1.40622   1
  -2  -2  11 -0.2731  1.9985   2
  -2  -2  11 1.46062 1.99491   3
   1   2 -11 553.409  16.997   1
   1   2 -11 526.553  15.367   3
  -1  -2  11 559.950  16.327   2
  -1  -2  11 532.548  15.476   3
  -1  -2  11 537.300  16.802   1
   0   2 -11 2.21336 3.16122   1
   0   2 -11 3.47871 1.50446   3
   0  -2  11 4.05658 2.59441   1
  -1   2 -11 2373.85   67.89   1
  -1   2 -11 2399.91   63.66   3
   1  -2  11 2485.71   68.95   1
  -2   2 -11 899.543  28.507   1
   2  -2  11 907.168  28.354   1
  -3   2 -11 39.6991  5.4432   1
   3  -2  11 43.6145  3.4163   4
  -4   2 -11 6.92992 4.73524   1
   4  -2  11 8.21171 2.11821   4
  -5   2 -11 -5.5869  4.9373   1
  -6   2 -11 9.97641 5.72957   1
  -7  -1  11 2.37406 5.83098   3
  -7  -1  11 0.10486 4.19814   2
  -6  -1  11 12.3271  4.0095   4
  -6  -1  11 9.41263 5.74170   2
  -6  -1  11 10.8097  4.8980   3
  -5  -1  11 72.1464  5.9374   4
  -5  -1  11 70.4778  6.1500   3
  -5  -1  11 61.2689  6.6645   2
  -4  -1  11 208.938   9.329   3
  -4  -1  11 214.144   9.948   2
  -4  -1  11 209.899   9.511   4
   3   1 -11 884.385  24.166   1
   3   1 -11 850.635  24.033   1
  -3  -1  11 855.472  25.385   3
  -3  -1  11 866.099  26.269   2
   2   1 -11 401.584  13.002   3
   2   1 -11 417.004  13.051   1
   2   1 -11 416.331  12.869   1
  -2  -1  11 417.829  13.190   3
  -2  -1  11 396.195  13.562   2
   1   1 -11 1029.00   28.10   3
   1   1 -11 1003.34   29.64   1
  -1  -1  11 1011.61   28.12   3
  -1  -1  11 1018.66   28.10   2
  -1  -1  11 1020.20   29.50   1
   0   1 -11 639.715  18.554   3
   0   1 -11 649.056  20.496   1
   0  -1  11 659.420  20.196   1
   0  -1  11 643.758  17.608   2
  -1   1 -11 1015.98   30.90   1
  -1   1 -11 1012.11   28.37   3
   1  -1  11 1029.27   30.69   1
  -2   1 -11 114.396   6.740   1
   2  -1  11 127.784   6.678   1
  -3   1 -11 169.750   8.961   1
  -4   1 -11 314.843  13.389   1
  -5   1 -11 -10.407   5.165   1
  -6   1 -11 11.6787  5.3503   1
  -7   0  11 18.0373  6.0578   3
  -7   0  11 11.8503  4.8358   2
  -6   0  11 16.3777  5.4558   3
  -6   0  11 11.5129  5.3133   2
  -6   0  11 22.4200  4.1931   4
  -5   0  11 77.1310  6.2656   4
  -5   0  11 94.2847  7.1998   3
  -4   0  11 10.5386  4.6924   3
   3   0 -11 586.662  17.437   1
   3   0 -11 593.026  18.566   3
   3   0 -11 590.046  17.331   1
  -3   0  11 584.652  18.775   3
   2   0 -11 -0.5920  2.1461   1
   2   0 -11 3.40568 2.00253   1
   2   0 -11 0.66727 1.85715   3
  -2   0  11 3.43662 2.60489   3
   1   0 -11 26.3658  3.4478   1
   1   0 -11 31.4542  3.0884   3
   1   0 -11 31.2181  3.2587   1
  -1   0  11 23.2929  3.3456   3
   0   0 -11 111.400   5.332   3
   0   0 -11 108.838   6.137   1
   0   0  11 114.947   5.900   1
  -1   0 -11 485.290  16.742   1
  -1   0 -11 493.139  15.223   3
   1   0  11 471.444  16.435   1
  -2   0 -11 37.1727  4.4648   1
   2   0  11 44.4201  4.3942   1
  -3   0 -11 4.51857 3.86074   1
  -4   0 -11 102.953   7.732   1
   4   0  11 84.8478  4.6572   4
  -5   0 -11 27.0743  5.8206   1
  -6   0 -11 16.1338  5.7128   1
  -7   1  11 30.6616  5.9156   3
  -7   1  11 37.9073  7.0866   2
  -6   1  11 19.5325  4.3169   4
  -6   1  11 19.3806  5.6875   3
  -5   1  11 144.667   8.644   3
   4  -1 -11 1338.59   38.58   3
   4  -1 -11 1294.92   36.92   1
   4  -1 -11 1316.00   37.15   1
  -4   1  11 1340.26   38.86   3
   3  -1 -11 25.4617  4.2295   3
   3  -1 -11 20.2601  2.8198   1
   3  -1 -11 23.5418  2.7973   1
  -3   1  11 20.4402  4.3296   3
   2  -1 -11 28.4210  3.3673   1
   2  -1 -11 39.8048  3.2243   1
   2  -1 -11 32.7945  3.8593   3
  -2   1  11 31.0959  3.8302   3
   1  -1 -11 806.486  23.673   3
   1  -1 -11 817.816  24.938   1
   1  -1 -11 807.844  24.589   1
  -1   1  11 808.916  23.950   3
  -1  -1 -11 40.1812  4.7756   1
  -1  -1 -11 36.6963  4.0836   1
  -1  -1 -11 39.7139  3.4950   3
   1   1  11 40.1052  2.0415   2
  -2  -1 -11 169.641   8.371   1
  -2  -1 -11 178.469   8.067   3
   2   1  11 158.632   8.013   1
  -3  -1 -11 581.781  20.609   1
   3   1  11 571.065  17.729   4
  -4  -1 -11 27.8715  5.1856   1
   4   1  11 29.1095  3.2296   4
  -5  -1 -11 47.9264  6.4494   1
  -6  -1 -11 29.9825  5.0443   1
  -7   2  11 19.9586  6.6496   3
  -6   2  11 22.5584  6.0109   3
   5  -2 -11 220.096   8.313   1
   5  -2 -11 232.253   8.648   1
  -5   2  11 237.134  11.556   3
   4  -2 -11 29.5409  3.3877   1
  -4   2  11 28.2752  5.5131   3
   3  -2 -11 9.65797 2.82800   1
   3  -2 -11 11.4656  3.0204   1
   3  -2 -11 7.94553 3.52205   3
  -3   2  11 7.06544 3.94152   3
   2  -2 -11 1284.33   37.47   1
   2  -2 -11 1291.47   37.17   1
   2  -2 -11 1270.50   36.43   3
  -2   2  11 1266.05   36.58   3
   1  -2 -11 146.939   7.068   3
   1  -2 -11 153.969   7.229   1
   1  -2 -11 140.096   6.937   1
  -1   2  11 146.308   7.023   3
   0  -2 -11 1195.37   35.06   1
   0  -2 -11 1167.86   35.23   1
   0  -2 -11 1153.09   33.39   3
  -1  -2 -11 102.336   6.733   1
  -1  -2 -11 105.792   6.197   3
  -1  -2 -11 89.8996  5.9568   1
   1   2  11 97.6076  4.2430   2
  -2  -2 -11 461.947  17.420   1
  -2  -2 -11 455.774  15.858   3
   2   2  11 475.082  13.919   2
  -3  -2 -11 35.6766  4.5360   1
   3   2  11 31.9223  3.3211   4
   4   2  11 4.26210 2.93019   4
  -5  -2 -11 61.5109  7.2721   1
  -7   3  11 13.9045  6.5772   3
   5  -3 -11 -1.8181  2.6047   1
  -5   3  11 -1.5718  2.9713   1
  -5   3  11 -6.9650  5.1521   3
   4  -3 -11 421.952  14.999   1
  -4   3  11 418.461  16.445   3
  -4   3  11 437.148  15.146   1
   3  -3 -11 -0.8602  2.8780   1
   3  -3 -11 4.03543 4.00652   3
  -3   3  11 16.8218  4.7843   3
  -3   3  11 12.8453  3.6210   1
   2  -3 -11 76.1009  5.5100   1
   2  -3 -11 81.0179  5.2874   3
  -2   3  11 71.4086  6.2440   3
  -2   3  11 74.0088  5.7234   1
   1  -3 -11 58.0963  4.9453   1
   1  -3 -11 73.7907  5.5475   1
   1  -3 -11 69.2862  5.3901   3
  -1   3  11 66.0195  5.9307   3
   0  -3 -11 121.092   7.527   1
   0  -3 -11 123.990   6.649   3
   0  -3 -11 116.515   7.063   1
  -1  -3 -11 18.7896  4.1762   3
  -1  -3 -11 10.7935  4.0120   1
  -2  -3 -11 308.974  13.248   1
   2   3  11 324.219  12.193   4
   2   3  11 330.689  10.933   2
  -3  -3 -11 3.17436 4.57430   1
   3   3  11 -0.2165  3.3224   4
   3   3  11 1.58497 2.37339   2
  -4  -3 -11 -5.3168  3.8281   1
  -5  -3 -11 83.7293  8.3917   1
  -6   4  11 107.375   8.155   3
  -5   4  11 21.0869  4.7446   3
  -5   4  11 21.3140  4.0774   1
   4  -4 -11 50.2014  5.2084   1
  -4   4  11 62.0368  7.1346   3
  -4   4  11 58.2043  5.4226   1
   3  -4 -11 230.227  10.329   1
  -3   4  11 241.334  11.320   3
  -3   4  11 235.256  10.751   1
   2  -4 -11 248.755  10.913   1
  -2   4  11 257.867  11.295   1
  -2   4  11 242.075  11.251   3
   1  -4 -11 16.5550  3.3511   1
  -1   4  11 18.5315  3.8153   3
  -1   4  11 15.8524  4.6222   1
   0  -4 -11 151.907   8.884   1
  -1  -4 -11 95.5162  7.4460   1
  -2  -4 -11 1.97595 3.46933   1
   2   4  11 7.10288 3.25317   2
  -3  -4 -11 145.329   9.783   1
   3   4  11 137.639   7.036   2
  -4  -4 -11 13.4436  5.1808   1
  -5  -4 -11 4.87220 5.70388   1
  -6   5  11 3.44707 6.50713   3
  -6   5  11 13.0893  4.3119   1
  -5   5  11 67.6298  6.2758   1
  -5   5  11 84.1733  8.3656   3
  -4   5  11 52.8596  7.0066   3
  -4   5  11 50.1970  6.1497   1
  -3   5  11 120.241   7.974   3
  -3   5  11 112.644   7.264   1
  -2   5  11 154.807   8.579   1
  -2   5  11 155.412   9.120   3
  -1   5  11 173.902  10.022   1
  -1   5  11 193.970  10.082   3
   0  -5 -11 -2.4617  4.8583   1
  -1  -5 -11 55.0125  7.3945   1
   1   5  11 57.5844  5.2348   2
  -2  -5 -11 49.1730  7.0298   1
   2   5  11 41.1617  4.7767   2
  -3  -5 -11 36.7415  5.3575   1
  -4  -5 -11 49.0399  7.5080   1
  -6   6  11 14.9406  4.7199   1
  -6   6  11 2.96659 6.62574   3
  -5   6  11 3.04290 6.08452   3
  -5   6  11 -1.9491  4.9232   1
  -4   6  11 3.73829 3.81889   1
  -4   6  11 5.56363 6.12019   3
  -3   6  11 133.655   9.138   1
  -3   6  11 140.897   8.977   3
  -2   6  11 29.0434  6.0990   3
  -2   6  11 22.5186  5.7987   1
  -1   6  11 53.7358  6.8693   1
   0  -6 -11 214.677  11.935   1
  -1  -6 -11 188.289  11.538   1
  -2  -6 -11 12.6806  5.8226   1
  -5   7  11 4.83761 6.03527   3
  -5   7  11 0.23711 4.70270   1
  -4   7  11 16.2619  4.8061   1
  -4   7  11 12.8550  4.8518   3
  -3   7  11 10.6280  6.3120   3
  -3   7  11 -2.2954  5.5090   1
  -2   7  11 78.2211  8.3145   3
  -2   7  11 91.7153  7.5492   1
  -1   7  11 57.2788  7.4681   1
   0   7  11 16.4605  5.7960   1
  -1  -7 -11 -2.8117  6.3689   1
  -2  -7 -11 74.4259  8.2714   1
  -4   8  11 3.80035 5.19371   1
  -4   8  11 5.63343 6.95508   3
  -3   8  11 19.1311  6.8939   1
  -3   8  11 28.0006  7.2333   3
  -2   8  11 2.69127 4.44197   1
  -1   8  11 24.4199  6.8772   1
   0   8  11 48.0412  8.2484   1
  -1  -8 -11 88.7154  9.8753   1
  -2   9  11 98.1406  9.8601   1
  -1   9  11 -1.6621  6.1633   1
  -1  -9  12 11.0010  6.5353   4
   0   9 -12 8.56950 5.80986   1
   1  -9  12 3.29712 5.39906   4
  -2   9 -12 5.89804 6.24461   1
   2  -9  12 2.73655 5.73180   4
  -3   9 -12 8.42275 5.09720   1
  -2  -8  12 43.8769  7.1361   4
   1   8 -12 133.733   8.533   1
   0   8 -12 7.95461 5.15598   1
   0  -8  12 7.47624 5.99804   4
  -1   8 -12 9.98576 5.95761   1
   1  -8  12 0.91457 5.52307   4
  -2   8 -12 -1.8640  5.6441   1
   2  -8  12 2.94440 4.96546   4
   3  -8  12 13.3359  5.0305   4
   4  -8  12 13.3869  4.8074   4
  -3  -7  12 58.9019  7.4258   4
   2   7 -12 1.23648 3.39243   1
  -2  -7  12 2.52928 4.75226   4
   1   7 -12 238.690  10.670   1
  -1  -7  12 253.820  12.686   4
   0   7 -12 6.08876 4.76680   1
   0  -7  12 5.39106 5.34407   4
  -1   7 -12 257.231  12.286   1
  -1   7 -12 224.947   9.830   2
  -2   7 -12 -2.5392  5.0432   1
   2  -7  12 3.42079 4.52110   4
  -3   7 -12 25.3851  6.1441   1
   3  -7  12 15.9145  4.9986   4
  -4   7 -12 11.6425  5.7861   1
   4  -7  12 7.06862 4.01536   4
  -5   7 -12 23.6097  6.7119   1
  -5  -6  12 16.9248  6.5877   4
  -5  -6  12 28.7549  6.7344   2
  -4  -6  12 -1.1142  5.5254   4
  -3  -6  12 3.45262 5.45661   4
   2   6 -12 292.047  11.025   1
  -2  -6  12 282.311  13.276   4
  -2  -6  12 272.928  10.601   1
   1   6 -12 10.9620  3.6431   1
  -1  -6  12 17.6931  4.1370   4
  -1  -6  12 14.5150  3.1356   1
   0   6 -12 244.992   9.905   2
   0   6 -12 249.280  11.334   1
   0  -6  12 235.798  10.898   4
  -1   6 -12 44.9384  3.9373   2
  -1   6 -12 35.9696  5.8547   1
   1  -6  12 35.5255  5.8487   4
  -2   6 -12 1.10613 2.21159   2
  -2   6 -12 -7.5953  4.9468   1
   2  -6  12 7.42419 4.38426   4
  -3   6 -12 183.658  10.768   1
  -3   6 -12 159.809   5.905   3
   3  -6  12 184.397   8.693   4
  -4   6 -12 28.3145  6.0225   1
  -4   6 -12 30.6398  3.3272   3
   4  -6  12 32.9516  4.3161   4
  -5   6 -12 6.27613 5.84876   1
  -5  -5  12 7.07350 5.55438   2
  -5  -5  12 6.62751 5.58892   4
  -4  -5  12 36.5776  5.6960   2
  -4  -5  12 32.8981  3.8547   3
  -4  -5  12 30.0583  5.8440   4
   3   5 -12 5.04807 1.83809   1
  -3  -5  12 7.80088 2.23392   3
  -3  -5  12 4.53194 5.05321   4
  -3  -5  12 0.85473 4.26761   2
   2   5 -12 14.6238  2.9678   1
  -2  -5  12 9.33640 3.73416   4
  -2  -5  12 10.5659  1.3352   3
  -2  -5  12 14.8674  2.6321   1
   1   5 -12 208.716   8.963   1
   1   5 -12 191.391   8.388   2
  -1  -5  12 202.836   8.697   1
  -1  -5  12 216.430  10.207   4
   0   5 -12 83.0429  5.5594   1
   0   5 -12 75.6212  4.7494   2
   0  -5  12 76.9632  5.4524   1
   0  -5  12 80.1528  6.6631   4
  -1   5 -12 -1.9971  4.2191   1
  -1   5 -12 0.58212 1.93919   2
   1  -5  12 -0.6412  3.2581   4
  -2   5 -12 417.801  13.142   2
  -2   5 -12 433.064  16.954   1
   2  -5  12 434.303  15.197   4
  -3   5 -12 -6.3914  4.2283   1
  -3   5 -12 0.52999 1.83554   3
   3  -5  12 3.71081 3.54415   4
  -4   5 -12 141.356   6.633   3
  -4   5 -12 132.827   8.945   1
   4  -5  12 138.087   6.591   4
  -5   5 -12 -1.0429  2.8292   3
  -5   5 -12 -0.3093  5.0388   1
  -6   5 -12 25.1329  5.6519   1
  -6   5 -12 32.7139  5.5674   3
  -6  -4  12 25.0378  5.5776   3
  -6  -4  12 22.3296  5.3175   4
  -6  -4  12 17.5070  6.0199   2
  -5  -4  12 -0.5197  3.9063   3
  -5  -4  12 -2.7920  4.5480   4
  -5  -4  12 9.18820 4.04073   2
  -4  -4  12 121.240   6.560   3
  -4  -4  12 128.541   8.428   4
  -4  -4  12 124.844   8.458   2
   3   4 -12 -0.0445  1.4304   1
  -3  -4  12 -3.4662  5.0355   4
  -3  -4  12 2.20112 1.13925   1
  -3  -4  12 7.60060 4.33089   2
  -3  -4  12 0.60026 2.10034   3
   2   4 -12 208.416   8.022   1
  -2  -4  12 206.089   6.948   3
  -2  -4  12 199.708   7.783   1
  -2  -4  12 218.714  10.345   4
  -2  -4  12 222.522   9.420   2
  -1  -4  12 24.5881  3.1518   1
  -1  -4  12 20.7722  4.6192   4
   0   4 -12 251.038  10.356   1
   0   4 -12 236.553   8.464   2
   0  -4  12 241.835  10.049   4
   0  -4  12 240.045   9.965   1
  -1   4 -12 18.2845  2.0356   2
  -1   4 -12 18.9476  4.0799   1
   1  -4  12 22.9902  4.3905   4
   1  -4  12 29.5355  4.3571   1
  -2   4 -12 516.858  14.867   3
  -2   4 -12 516.492  14.782   3
  -2   4 -12 512.489  18.919   1
  -2   4 -12 523.357  14.582   2
   2  -4  12 507.522  16.805   4
  -3   4 -12 33.9191  2.0140   2
  -3   4 -12 28.5697  5.6779   1
   3  -4  12 37.8852  4.2968   4
  -4   4 -12 80.6668  7.4409   1
   4  -4  12 79.2984  4.7297   4
  -5   4 -12 4.11603 3.38694   3
  -5   4 -12 4.56775 4.70942   1
  -6   4 -12 135.959  10.527   1
  -6   4 -12 126.532   8.607   3
  -6  -3  12 -4.0177  4.8717   3
  -6  -3  12 3.24334 3.35438   4
  -6  -3  12 4.22139 4.21527   2
  -5  -3  12 30.1786  5.4399   4
  -5  -3  12 43.9402  6.3759   2
  -5  -3  12 25.8343  4.4372   3
  -4  -3  12 166.375   8.115   3
  -4  -3  12 171.650   8.844   4
  -4  -3  12 186.940   9.932   2
  -3  -3  12 39.0287  3.5412   3
  -3  -3  12 50.7377  5.8913   4
  -3  -3  12 49.6364  5.2845   2
   2   3 -12 276.635   9.471   1
  -2  -3  12 279.871  10.641   2
  -2  -3  12 262.023  10.873   4
  -2  -3  12 273.550   9.262   1
  -2  -3  12 262.391   8.827   3
   1   3 -12 29.3081  3.5513   1
  -1  -3  12 26.1898  1.8266   3
  -1  -3  12 28.5470  3.0805   1
  -1  -3  12 21.5578  4.4208   4
  -1  -3  12 28.2558  2.8174   2
   0   3 -12 0.91320 2.48260   1
   0  -3  12 2.56384 2.81315   1
   0  -3  12 9.14330 3.88217   4
  -1   3 -12 1212.48   36.60   1
  -1   3 -12 1224.67   32.53   3
   1  -3  12 1220.28   34.71   4
   1  -3  12 1223.84   36.33   1
  -2   3 -12 2083.79   60.37   1
   2  -3  12 2084.94   56.25   4
  -3   3 -12 95.5683  7.6323   1
   3  -3  12 101.263   5.679   4
  -4   3 -12 67.1282  6.7551   1
   4  -3  12 61.8216  3.9710   4
  -5   3 -12 10.5038  4.8360   1
  -6   3 -12 3.33816 5.83795   1
  -6  -2  12 -7.3297  5.1533   2
  -6  -2  12 -4.7669  4.5092   3
  -6  -2  12 -4.0002  4.4406   4
  -5  -2  12 28.1913  4.1288   4
  -5  -2  12 30.1023  4.7240   2
  -5  -2  12 31.1308  4.8808   3
  -4  -2  12 58.1875  5.0417   3
  -4  -2  12 61.5556  6.2001   2
  -4  -2  12 64.8248  5.3202   4
   3   2 -12 422.660  12.501   1
   3   2 -12 425.925  12.558   1
  -3  -2  12 444.204  14.202   3
  -3  -2  12 424.828  15.540   4
  -3  -2  12 424.918  15.286   2
   2   2 -12 45.0458  3.3766   1
  -2  -2  12 47.7658  3.4401   3
  -2  -2  12 41.9025  3.9291   2
  -2  -2  12 53.4795  5.5832   4
  -2  -2  12 40.9344  2.9265   1
   1   2 -12 693.911  19.287   3
   1   2 -12 696.068  21.103   1
  -1  -2  12 665.669  20.746   1
  -1  -2  12 687.124  19.335   3
  -1  -2  12 680.408  19.936   2
   0   2 -12 277.342  10.538   1
   0   2 -12 272.801   8.613   3
   0  -2  12 271.481  10.453   1
  -1   2 -12 -1.4705  4.9370   3
  -1   2 -12  0.1356 10.5573   1
   1  -2  12 0.51626 3.40252   1
  -2   2 -12 2083.61   59.44   1
   2  -2  12 2018.48   58.90   1
  -3   2 -12 521.149  19.086   1
   3  -2  12 513.948  16.183   4
  -4   2 -12 102.959   7.301   1
   4  -2  12 100.071   4.875   4
  -5   2 -12 -1.8179  3.5266   1
  -6   2 -12 1.09479 3.84209   1
  -6  -1  12 8.56643 4.79642   3
  -6  -1  12 -8.0072  5.8406   2
  -6  -1  12 3.10205 3.81449   4
  -5  -1  12 54.9793  4.9837   4
  -5  -1  12 64.0966  6.8679   2
  -5  -1  12 71.1828  6.1644   3
  -4  -1  12 -0.1634  4.3202   2
  -4  -1  12 5.53312 4.36277   4
  -4  -1  12 1.54549 3.68946   3
   3   1 -12 773.834  22.933   1
   3   1 -12 813.308  23.089   1
  -3  -1  12 827.178  25.089   2
  -3  -1  12 835.996  24.471   3
   2   1 -12 399.049  12.827   3
   2   1 -12 395.164  12.958   1
   2   1 -12 397.411  12.801   1
  -2  -1  12 386.991  13.230   2
  -2  -1  12 415.959  13.131   3
   1   1 -12 -3.8891  2.4635   3
   1   1 -12 -0.8631  2.1704   1
  -1  -1  12 5.26488 2.29991   3
  -1  -1  12 -0.9626  2.2399   1
  -1  -1  12 -2.3035  2.0260   2
   0   1 -12 1.34324 1.75645   3
   0   1 -12 3.79833 2.43227   1
   0  -1  12 -0.0687  2.4386   1
  -1   1 -12 494.512  18.066   1
  -1   1 -12 549.652  16.260   3
   1  -1  12 547.935  18.107   1
  -2   1 -12 5.64891 2.77885   1
  -2   1 -12 5.92780 2.38075   3
   2  -1  12 2.30804 3.00368   1
  -3   1 -12 79.5374  6.6952   1
  -4   1 -12 38.0849  5.6246   1
  -5   1 -12 170.624  10.025   1
  -6   1 -12 12.3520  5.7396   1
  -7   0  12 0.38279 5.80307   2
  -7   0  12 15.9603  6.1303   3
  -6   0  12 16.5070  5.8198   2
  -6   0  12 27.4341  3.9767   4
  -6   0  12 22.9376  4.8500   3
  -5   0  12 2.08818 4.41159   3
  -4   0  12 362.601  13.680   3
   3   0 -12 797.157  23.747   3
   3   0 -12 778.704  22.829   1
   3   0 -12 757.877  22.651   1
  -3   0  12 786.145  23.826   3
   2   0 -12 27.2525  2.6170   1
   2   0 -12 29.0733  3.5776   3
   2   0 -12 23.8562  2.8442   1
  -2   0  12 22.1565  2.8847   3
   1   0 -12 1281.66   36.86   1
   1   0 -12 1227.91   36.45   1
   1   0 -12 1273.46   35.12   3
  -1   0  12 1274.27   35.24   3
   0   0 -12 152.196   6.497   3
   0   0 -12 141.314   7.371   1
   0   0  12 137.790   6.889   1
  -1   0 -12 108.858   6.512   1
  -1   0 -12 119.313   5.819   3
   1   0  12 114.955   6.668   1
  -2   0 -12 106.180   5.673   3
  -2   0 -12 89.4596  6.2099   1
   2   0  12 91.0026  6.3786   1
  -3   0 -12 431.623  16.877   1
   4   0  12 7.71826 2.47839   4
  -5   0 -12 3.81748 5.03234   1
  -6   0 -12 14.8606  5.8258   1
  -7   1  12 2.17837 5.81565   3
  -7   1  12 6.43769 6.40262   2
  -6   1  12 17.1307  3.7647   4
  -6   1  12 20.6461  4.4161   3
  -5   1  12 7.55356 5.22668   3
   4  -1 -12 233.427   8.433   1
   4  -1 -12 221.871   8.158   1
  -4   1  12 220.957  10.855   3
   3  -1 -12 366.065  12.417   1
   3  -1 -12 366.426  13.181   3
   3  -1 -12 368.332  12.254   1
  -3   1  12 356.941  13.369   3
   2  -1 -12 321.463  11.516   3
   2  -1 -12 318.759  11.683   1
   2  -1 -12 330.492  11.579   1
  -2   1  12 328.917  11.804   3
   1  -1 -12 454.636  14.745   3
   1  -1 -12 435.406  15.404   1
   1  -1 -12 454.803  15.224   1
  -1   1  12 438.880  14.873   3
   0  -1 -12 12.2174  3.1558   3
   0  -1 -12 12.8457  2.5495   1
   0  -1 -12 13.1136  3.8025   1
  -1  -1 -12 2053.55   55.39   3
  -1  -1 -12 2008.00   61.90   1
  -1  -1 -12 1980.64   58.00   1
   1   1  12 2032.54   52.53   2
  -2  -1 -12 140.393   7.125   3
  -2  -1 -12 161.365   8.808   1
  -3  -1 -12 6.34186 4.59268   1
  -4  -1 -12 52.0216  5.6881   1
  -5  -1 -12 4.95987 3.71941   1
  -6   2  12 3.75763 4.00915   3
   5  -2 -12 45.3175  3.7710   1
  -5   2  12 59.2713  6.8944   3
   4  -2 -12 34.1625  3.8175   1
   4  -2 -12 29.9634  3.3525   1
  -4   2  12 18.6425  5.4022   3
   3  -2 -12 4.59323 2.44091   1
   3  -2 -12 0.68180 3.46368   3
   3  -2 -12 3.84558 3.11573   1
  -3   2  12 4.62809 4.38851   3
   2  -2 -12 174.975   8.504   1
   2  -2 -12 180.672   8.401   3
   2  -2 -12 169.794   7.737   1
  -2   2  12 182.320   8.865   3
   1  -2 -12 -1.3266  3.1064   1
   1  -2 -12 0.98725 3.25215   3
   1  -2 -12 -2.4519  3.7084   1
  -1   2  12 -2.9002  3.7909   3
   0  -2 -12 194.941   9.050   1
   0  -2 -12 188.280   8.584   3
   0  -2 -12 201.333   9.184   1
  -1  -2 -12 122.496   7.033   1
  -1  -2 -12 135.724   8.416   1
  -1  -2 -12 141.237   7.402   3
   1   2  12 137.305   5.293   2
  -2  -2 -12 1421.79   44.23   1
   2   2  12 1500.58   39.30   2
  -3  -2 -12 -2.2189  4.2433   1
   3   2  12 4.50105 3.12493   4
  -4  -2 -12 189.828  11.040   1
  -5  -2 -12 -3.1899  5.5738   1
  -7   3  12 1.79066 4.42936   3
  -6   3  12 30.3732  5.4815   3
  -5   3  12 26.9063  3.6417   1
  -5   3  12 20.1193  4.5197   3
   4  -3 -12 2.57493 2.72018   1
  -4   3  12 4.96847 3.56035   1
  -4   3  12 2.01696 5.43477   3
   3  -3 -12 20.4182  3.8417   1
  -3   3  12 17.6793  3.8547   1
  -3   3  12 24.0310  5.0375   3
   2  -3 -12 406.420  14.577   1
   2  -3 -12 412.105  15.171   1
   2  -3 -12 394.423  14.289   3
  -2   3  12 395.902  14.918   3
   1  -3 -12 52.2706  5.7669   1
   1  -3 -12 56.7906  5.2392   1
   1  -3 -12 52.5008  4.9109   3
  -1   3  12 56.1470  5.8005   3
   0  -3 -12 109.405   7.201   1
   0  -3 -12 103.645   6.599   1
   0  -3 -12 120.799   6.810   3
  -1  -3 -12 372.819  15.239   1
   1   3  12 420.963  12.915   2
  -2  -3 -12 178.014   9.434   1
   2   3  12 168.881   8.271   4
   2   3  12 177.057   7.029   2
  -3  -3 -12 0.07598 4.45248   1
   3   3  12 -6.2287  3.7853   4
  -4  -3 -12 40.1088  6.3639   1
  -5  -3 -12 110.103   9.211   1
  -6   4  12 -6.8685  6.2274   3
  -5   4  12 93.0488  6.4663   1
  -5   4  12 89.7320  8.3168   3
   4  -4 -12 71.7753  5.7589   1
  -4   4  12 66.8940  5.8017   1
  -4   4  12 60.5181  6.1366   3
   3  -4 -12 12.0902  4.3506   1
  -3   4  12 8.93479 4.44037   1
  -3   4  12 3.38783 5.27493   3
   2  -4 -12 325.503  13.246   1
  -2   4  12 317.476  13.520   3
  -2   4  12 324.216  13.409   1
   1  -4 -12 37.3109  5.8587   1
  -1   4  12 39.5525  5.5569   3
   0  -4 -12 149.081   8.553   1
  -1  -4 -12 132.222   8.169   1
   1   4  12 129.600   6.567   2
  -2  -4 -12 54.4441  5.6856   1
   2   4  12 46.2577  3.9753   2
  -3  -4 -12 181.605  10.950   1
  -4  -4 -12 141.658  10.139   1
  -6   5  12 2.71931 6.45892   3
  -5   5  12 -4.0684  6.5747   3
  -5   5  12 -3.2184  4.0446   1
  -4   5  12 70.7253  8.0253   3
  -4   5  12 72.2881  6.7721   1
  -3   5  12 158.178   9.113   3
  -3   5  12 166.701   9.014   1
  -2   5  12 6.01370 4.82588   1
  -2   5  12 6.18234 5.46087   3
   1  -5 -12 34.9887  5.3412   1
  -1   5  12 42.5989  5.4619   1
   0  -5 -12 61.7845  7.1498   1
  -1  -5 -12 179.781  10.783   1
   1   5  12 180.536   8.431   2
  -2  -5 -12 264.627  13.493   1
  -3  -5 -12 17.8116  5.7537   1
  -4  -5 -12 2.29752 5.89472   1
  -5   6  12 28.3735  7.0956   3
  -4   6  12 8.70526 6.05655   3
  -4   6  12 2.93587 3.63909   1
  -3   6  12 2.58731 4.20992   3
  -3   6  12 0.15695 4.93531   1
  -2   6  12 11.3060  4.4441   3
  -2   6  12 16.2537  4.4972   1
   0  -6 -12 38.1203  7.2416   1
  -1  -6 -12 3.16551 6.19358   1
  -2  -6 -12 24.8669  6.5757   1
  -3  -6 -12 161.519  11.382   1
  -5   7  12 3.77894 4.85944   3
  -5   7  12 4.34204 4.62290   1
  -4   7  12 20.2022  6.7838   3
  -4   7  12 10.3654  5.7501   1
  -3   7  12 20.6330  5.1636   3
  -3   7  12 15.0856  5.5954   1
  -2   7  12 26.8462  6.6504   1
  -2   7  12 35.9995  5.6128   3
  -1   7  12 6.03227 5.87936   1
   0  -7 -12 50.8541  6.7279   1
  -1  -7 -12 4.49512 5.36436   1
  -2  -7 -12 4.27123 5.79908   1
  -4   8  12 15.3509  6.5253   1
  -3   8  12 24.2818  6.3520   1
  -3   8  12 34.2165  7.2221   3
  -2   8  12 41.4622  7.8486   1
   0  -8 -12 4.25424 4.93230   1
   1   9 -13 21.6508  5.7280   1
   0   9 -13 42.8704  6.9843   1
  -1   9 -13 34.2213  7.0408   1
  -2   9 -13 7.38837 6.25147   1
   2  -9  13 0.38431 5.81039   4
  -3  -8  13 41.5324  7.3179   4
  -2  -8  13 -0.5785  4.4112   4
  -1  -8  13 6.78642 6.08928   4
   0   8 -13 28.3917  6.0729   1
   0  -8  13 27.8320  6.8216   4
  -1   8 -13 166.284  10.687   1
   1  -8  13 164.564  10.365   4
  -2   8 -13 27.2357  6.5799   1
   2  -8  13 19.3651  5.3076   4
  -3   8 -13 -0.0867  6.5209   1
   3  -8  13 -0.4397  4.8655   4
  -4   8 -13 76.4188  8.7531   1
  -4  -7  13 34.0420  7.2150   4
  -3  -7  13 63.1559  6.5985   4
   2   7 -13 -2.7267  3.1878   1
  -2  -7  13 -3.9359  4.2662   4
   1   7 -13 89.5112  7.0719   1
  -1  -7  13 115.895   8.989   4
   0   7 -13 10.8203  5.0132   1
  -1   7 -13 25.4260  5.5464   1
  -1   7 -13 21.4877  3.7306   2
   1  -7  13 17.7896  6.0141   4
  -2   7 -13 52.4516  6.6246   1
   2  -7  13 51.5353  5.9803   4
  -3   7 -13 74.9023  7.9377   1
   3  -7  13 80.9414  6.9495   4
  -4   7 -13 -2.0483  5.3053   1
   4  -7  13 3.46708 3.52486   4
  -4  -6  13 6.35434 5.72197   4
  -3  -6  13 7.70171 4.86500   4
   2   6 -13 229.670   9.627   1
  -2  -6  13 231.722  12.032   4
   1   6 -13 5.43777 4.05540   1
  -1  -6  13 8.52323 5.09548   4
   0   6 -13 275.667  12.084   1
   0   6 -13 258.560  10.312   2
   0  -6  13 259.622  12.169   4
  -1   6 -13 455.604  15.104   2
  -1   6 -13 467.814  17.547   1
   1  -6  13 478.452  17.168   4
  -2   6 -13 6.51148 5.08734   1
   2  -6  13 -0.8659  4.1144   4
  -3   6 -13 -13.185   5.638   1
   3  -6  13 4.25846 3.13333   4
  -4   6 -13 -4.1745  5.3899   1
   4  -6  13 2.51089 3.21090   4
  -5   6 -13 2.46854 5.44527   1
  -5  -5  13 -3.9017  5.7166   2
  -4  -5  13 113.615   8.676   4
  -4  -5  13 111.576   7.898   2
  -4  -5  13 113.992   6.226   3
   3   5 -13 167.944   6.563   1
  -3  -5  13 174.757   6.849   3
  -3  -5  13 182.324  10.385   4
  -3  -5  13 184.099   9.817   2
   2   5 -13 12.9074  3.1638   1
  -2  -5  13 13.2592  2.4846   1
   1   5 -13 39.3532  4.5984   1
   1   5 -13 38.6455  3.5821   2
  -1  -5  13 41.9339  4.0514   1
  -1  -5  13 41.6241  5.8509   4
   0   5 -13 104.238   6.377   1
   0   5 -13 99.1058  5.1556   2
   0  -5  13 102.267   6.490   1
   0  -5  13 104.631   7.481   4
  -1   5 -13 22.3598  2.5794   2
  -1   5 -13 22.1484  4.9482   1
   1  -5  13 16.6118  3.7267   4
  -2   5 -13 284.328   9.693   2
  -2   5 -13 312.779  13.991   1
   2  -5  13 320.610  12.537   4
  -3   5 -13 16.3084  5.4256   1
  -3   5 -13 14.6761  2.3455   3
   3  -5  13 22.7005  3.9348   4
  -4   5 -13 0.39998 5.61924   1
  -4   5 -13 2.10423 2.62169   3
   4  -5  13 5.34554 3.15626   4
  -5   5 -13 29.5402  6.9561   1
  -5   5 -13 27.6078  4.3732   3
  -5  -4  13 3.84839 4.05565   2
  -5  -4  13 -4.7816  5.2777   4
  -5  -4  13 -0.8461  3.9065   3
  -4  -4  13 2.92688 3.35467   3
  -4  -4  13 1.90368 4.48790   4
  -4  -4  13 17.5926  5.2501   2
   3   4 -13 16.4981  1.8488   1
  -3  -4  13 16.9527  4.6641   2
  -3  -4  13 20.9978  4.1425   4
  -3  -4  13 15.5012  2.5802   3
  -3  -4  13 13.5576  1.6875   1
   2   4 -13 396.852  13.560   1
  -2  -4  13 409.654  12.102   3
  -2  -4  13 423.804  15.873   4
  -2  -4  13 409.978  14.780   2
  -2  -4  13 404.321  13.365   1
   1   4 -13 21.0623  3.4723   1
  -1  -4  13 13.8843  2.5477   1
  -1  -4  13 20.0215  4.6283   4
   0   4 -13 -0.0425  2.8313   1
   0  -4  13 -0.1565  3.8119   4
   0  -4  13 7.26755 3.01749   1
  -1   4 -13 194.665   9.398   1
  -1   4 -13 172.788   6.188   2
   1  -4  13 180.253   9.021   1
   1  -4  13 176.836   8.698   4
  -2   4 -13 320.273  14.227   1
  -2   4 -13 320.036   9.986   3
   2  -4  13 340.723  12.537   4
  -3   4 -13 -2.8044  4.4002   1
   3  -4  13 4.31600 3.24118   4
  -4   4 -13 18.1973  5.4400   1
   4  -4  13 15.2796  3.0885   4
  -5   4 -13 8.44924 3.73937   3
  -5   4 -13 -0.7283  5.4226   1
  -6  -3  13 1.16226 4.59467   3
  -6  -3  13 1.55248 5.29343   2
  -5  -3  13 65.0661  5.8613   3
  -5  -3  13 70.1049  6.5008   4
  -5  -3  13 67.8103  7.4735   2
  -4  -3  13 198.682  10.410   2
  -4  -3  13 196.461  10.303   4
  -4  -3  13 186.651   8.566   3
   3   3 -13 1.88010 1.35659   1
   3   3 -13 2.59071 1.32323   1
  -3  -3  13 7.68792 4.04904   2
  -3  -3  13 6.21469 3.69474   4
   2   3 -13 225.635   8.445   1
  -2  -3  13 216.228   7.753   3
  -2  -3  13 242.851  10.649   4
  -2  -3  13 217.713   9.350   2
  -2  -3  13 217.712   8.135   1
   1   3 -13 453.915  15.585   1
  -1  -3  13 470.443  15.454   1
  -1  -3  13 461.848  16.361   4
  -1  -3  13 478.730  14.873   2
  -1  -3  13 471.479  13.268   3
   0   3 -13 2.79780 3.44412   1
   0   3 -13 0.88017 1.02322   3
   0  -3  13 1.04089 3.58883   4
   0  -3  13 1.82216 2.74516   1
  -1   3 -13 16.9859  2.0182   3
  -1   3 -13 25.4726  5.3163   1
   1  -3  13 19.1577  3.5377   4
   1  -3  13 22.0845  4.2097   1
  -2   3 -13 -1.1852  2.4610   3
  -2   3 -13 -6.7720  5.2822   1
   2  -3  13 -1.2825  7.2605   4
  -3   3 -13 87.6404  6.7393   1
   3  -3  13 92.6717  5.5795   4
  -4   3 -13 28.2866  4.9533   1
   4  -3  13 28.1088  3.3402   4
  -5   3 -13 47.0782  6.8090   1
  -6   3 -13 7.20873 5.95229   1
  -6  -2  13 9.18116 4.85429   4
  -6  -2  13 1.94868 3.86664   2
  -6  -2  13 10.2594  5.0913   3
  -5  -2  13 6.15212 4.64218   4
  -5  -2  13 15.5355  4.6148   3
  -5  -2  13 23.1414  5.6437   2
  -4  -2  13 30.4167  5.2124   2
  -4  -2  13 39.1914  5.3630   4
  -4  -2  13 34.9527  4.0503   3
   3   2 -13 521.720  15.241   1
   3   2 -13 500.267  15.099   1
  -3  -2  13 532.482  16.553   3
  -3  -2  13 520.306  17.666   2
  -3  -2  13 504.932  17.605   4
   2   2 -13 412.858  13.361   1
   2   2 -13 396.747  12.862   3
  -2  -2  13 422.210  14.004   2
  -2  -2  13 408.028  13.197   1
  -2  -2  13 399.512  14.642   4
  -2  -2  13 418.653  13.063   3
   1   2 -13 29.5490  3.1478   1
   1   2 -13 30.8808  2.6123   3
  -1  -2  13 29.6032  3.2211   1
  -1  -2  13 33.2912  2.7526   3
  -1  -2  13 36.1974  3.1778   2
   0   2 -13 161.154   7.935   1
   0   2 -13 151.529   5.772   3
   0  -2  13 157.175   7.471   1
  -1   2 -13 2170.91   61.91   1
  -1   2 -13 2139.86   57.40   3
   1  -2  13 2167.00   61.66   1
  -2   2 -13 334.825  11.325   3
  -2   2 -13 332.878  14.156   1
  -3   2 -13 150.645   9.444   1
   3  -2  13 148.161   7.004   4
  -4   2 -13 1.92239 3.33231   1
   4  -2  13 -0.1842  2.2834   4
  -5   2 -13 21.3024  5.8620   1
  -6   2 -13 0.50781 5.24263   1
  -6  -1  13 4.14890 3.65942   3
  -6  -1  13 -2.5296  5.4967   2
  -6  -1  13 -1.5237  3.6450   4
  -5  -1  13 4.52574 4.35615   4
  -5  -1  13 2.56756 4.08007   3
  -5  -1  13 3.89238 4.80567   2
  -4  -1  13 30.5068  5.4541   4
  -4  -1  13 31.9086  4.5878   3
  -4  -1  13 37.4143  5.4334   2
   3   1 -13 58.8462  3.4294   1
   3   1 -13 68.9550  5.1390   3
   3   1 -13 62.1071  3.7110   1
  -3  -1  13 54.7286  4.3563   3
  -3  -1  13 60.0774  5.7501   2
   2   1 -13 73.3556  4.3974   1
   2   1 -13 81.9975  4.8155   3
   2   1 -13 80.0479  4.7265   1
  -2  -1  13 76.6624  4.8196   3
  -2  -1  13 69.2795  4.8150   2
   1   1 -13 1145.97   31.67   3
   1   1 -13 1177.15   33.76   1
  -1  -1  13 1130.49   33.34   1
  -1  -1  13 1131.01   31.71   3
  -1  -1  13 1113.45   31.40   2
   0   1 -13 315.858  12.081   1
   0   1 -13 307.401  10.287   3
   0  -1  13 297.926   8.900   2
   0  -1  13 304.723  11.571   1
  -1   1 -13 110.522   5.437   3
  -1   1 -13 103.645   6.445   1
   1  -1  13 104.359   6.630   1
  -2   1 -13 72.9096  6.5940   1
  -2   1 -13 86.9525  4.9116   3
  -3   1 -13 284.609  12.758   1
  -4   1 -13 77.2957  7.1531   1
  -5   1 -13 5.78745 4.09071   1
  -6   1 -13 22.1097  6.5780   1
  -6   0  13 50.0072  6.5156   3
  -6   0  13 59.0166  7.4862   2
  -6   0  13 41.6787  5.5483   4
  -5   0  13 5.55848 3.82767   2
  -5   0  13 -0.5761  4.3717   3
   4   0 -13 45.4372  2.6146   1
   4   0 -13 47.6048  2.7246   1
  -4   0  13 57.6460  5.6102   3
   3   0 -13 1194.55   33.91   1
   3   0 -13 1202.49   33.78   1
   3   0 -13 1169.04   34.10   3
  -3   0  13 1172.31   34.22   3
   2   0 -13 4.69467 1.95885   1
   2   0 -13 8.24005 2.86035   3
   2   0 -13 2.43685 1.90206   1
  -2   0  13 7.74632 2.47925   3
   1   0 -13 24.2816  3.5564   1
   1   0 -13 18.2872  3.5679   1
   1   0 -13 17.7206  2.6074   3
  -1   0  13 18.6418  3.4335   3
   0   0 -13 598.760  19.693   1
   0   0 -13 589.824  18.201   3
   0   0  13 589.678  19.424   1
  -1   0 -13 73.8524  4.9497   3
  -1   0 -13 72.1791  6.1757   1
   1   0  13 67.7094  5.0231   1
  -2   0 -13 1217.56   34.77   3
  -2   0 -13 1196.73   37.42   1
  -3   0 -13 320.242  14.176   1
  -4   0 -13 152.605   9.102   1
  -5   0 -13 111.104   9.123   1
  -6   1  13 11.2708  5.5239   3
  -5   1  13 71.5370  6.8913   3
   4  -1 -13 29.4699  3.4431   1
   4  -1 -13 25.7279  3.0567   1
  -4   1  13 32.0100  4.7964   3
   3  -1 -13 211.665   8.562   1
   3  -1 -13 212.019   8.788   1
   3  -1 -13 235.062   9.959   3
  -3   1  13 216.483   9.591   3
   2  -1 -13 26.2918  3.8999   3
   2  -1 -13 29.4544  3.8489   1
   2  -1 -13 32.0967  3.1765   1
  -2   1  13 35.8161  4.6906   3
   1  -1 -13 223.781   9.488   1
   1  -1 -13 213.252   9.262   1
   1  -1 -13 226.479   9.185   3
  -1   1  13 225.299   9.311   3
   0  -1 -13 148.152   7.699   1
   0  -1 -13 146.031   6.884   3
   0  -1 -13 154.209   8.277   1
  -1  -1 -13 830.023  27.624   1
  -1  -1 -13 904.082  28.500   1
  -1  -1 -13 893.597  26.380   3
  -2  -1 -13 207.868  10.094   1
  -2  -1 -13 199.727   9.240   3
  -3  -1 -13 236.846  12.026   1
  -4  -1 -13 122.429   9.218   1
  -5  -1 -13 20.8261  5.2944   1
  -6   2  13 46.3125  7.0895   3
   5  -2 -13 24.9027  3.1554   1
  -5   2  13 24.9721  5.6960   3
   4  -2 -13 105.702   5.690   1
   4  -2 -13 103.818   5.885   1
  -4   2  13 100.073   6.893   3
   3  -2 -13 3.66480 3.40086   1
   3  -2 -13 3.88765 2.68742   1
  -3   2  13 2.96977 3.16879   3
   2  -2 -13 253.103  10.349   1
   2  -2 -13 258.992  10.690   3
   2  -2 -13 250.112  10.634   1
  -2   2  13 260.627  10.871   3
   1  -2 -13 15.7505  3.0697   3
   1  -2 -13 18.8076  3.5248   1
   1  -2 -13 18.5133  4.0766   1
  -1   2  13 20.4544  4.6408   3
   0  -2 -13 935.645  27.391   3
   0  -2 -13 867.272  28.360   1
   0  -2 -13 906.106  28.872   1
  -1  -2 -13 42.3847  6.2874   1
  -1  -2 -13 37.4291  4.2726   3
   1   2  13 43.2180  2.9592   2
  -2  -2 -13 56.2689  6.8287   1
   2   2  13 52.6436  3.0709   2
  -3  -2 -13 2.66047 3.22467   1
   3   2  13 3.56498 3.49511   4
  -4  -2 -13 14.9583  4.4129   1
  -5  -2 -13 7.78369 4.17851   1
  -6   3  13 0.10751 5.56145   3
   5  -3 -13 34.0100  4.3927   1
  -5   3  13 29.5742  6.1952   3
   4  -3 -13 2.46365 3.17991   1
   4  -3 -13 1.02112 3.61735   1
  -4   3  13 0.91997 4.67011   3
   3  -3 -13 10.8784  3.3654   1
   3  -3 -13 21.5847  4.7770   1
  -3   3  13 13.8419  3.8156   3
   2  -3 -13 36.8566  4.7941   1
   2  -3 -13 35.8180  5.2972   1
  -2   3  13 33.6725  5.7545   3
   1  -3 -13 174.762   9.208   1
   1  -3 -13 165.843   8.382   1
  -1   3  13 174.459   9.094   3
   0  -3 -13 316.954  13.673   1
  -1  -3 -13 675.282  23.533   1
   1   3  13 686.024  20.028   2
  -2  -3 -13 3.00102 4.06961   1
   2   3  13 1.58836 2.13218   2
  -3  -3 -13 52.8153  6.7003   1
  -4  -3 -13 16.0057  4.7749   1
  -6   4  13 31.0011  7.3372   3
  -5   4  13 9.88881 3.47389   1
   4  -4 -13 4.62619 4.63101   1
  -4   4  13 2.13374 4.08224   1
  -3   4  13 395.665  15.194   1
  -3   4  13 365.314  14.877   3
   2  -4 -13 11.8241  4.0671   1
  -2   4  13 3.69379 5.29840   3
   1  -4 -13 -3.7873  3.8190   1
  -1   4  13 1.92053 4.98333   3
   0  -4 -13 21.3777  5.7021   1
  -1  -4 -13 55.7750  5.8281   1
   1   4  13 70.2172  4.6863   2
  -2  -4 -13 43.4687  5.6106   1
  -3  -4 -13 43.6645  5.8236   1
  -4  -4 -13 6.28140 5.95442   1
  -6   5  13 0.50295 6.52990   3
  -5   5  13 43.6519  5.9548   1
  -5   5  13 44.5881  7.5791   3
  -4   5  13 32.7447  5.8400   1
  -4   5  13 23.2201  6.7212   3
  -3   5  13 56.5754  6.3985   1
  -3   5  13 46.5595  5.8042   3
  -2   5  13 43.9355  5.7084   3
  -2   5  13 50.6851  6.5264   1
   1  -5 -13 575.788  21.734   1
   0  -5 -13 28.5472  5.0494   1
  -1  -5 -13 5.12130 5.73371   1
   1   5  13 2.73047 3.59194   2
  -2  -5 -13 115.437   9.443   1
  -3  -5 -13 78.0973  8.7050   1
  -5   6  13 17.2882  6.8180   3
  -5   6  13 3.17312 4.92478   1
  -4   6  13 36.7268  6.5378   1
  -4   6  13 50.8359  7.8758   3
  -3   6  13 58.9062  6.1956   1
  -3   6  13 71.0430  6.9113   3
  -2   6  13 21.8349  5.8854   3
  -2   6  13 16.1003  5.9407   1
   1  -6 -13 -11.119   6.095   1
   0  -6 -13 158.390  10.082   1
  -1  -6 -13 34.6016  6.9599   1
  -2  -6 -13 1.79151 5.97780   1
  -3  -6 -13 10.8325  6.8038   1
  -4   7  13 0.71932 5.59163   1
  -4   7  13 -8.1125  7.0347   3
  -3   7  13 14.2762  5.8601   3
  -3   7  13 9.13567 6.38055   1
  -2   7  13 56.1534  6.5675   1
  -2   7  13 69.6011  8.1669   3
   1  -7 -13 100.234   8.727   1
  -1   7  13 112.550   8.721   1
   0  -7 -13 9.28293 6.00000   1
  -1  -7 -13 21.7741  5.4362   1
  -3   8  13 -2.3650  6.3256   3
  -2   8  13 74.6169  7.8372   1
  -1   8  13 18.3126  6.6192   1
   0  -8 -13 19.3035  6.0776   1
   0   9 -14 102.764   8.568   1
   0  -9  14 107.146   9.376   4
  -1   9 -14 22.6132  5.2268   1
   1  -9  14 24.6577  6.9647   4
   2  -9  14 19.2091  5.9067   4
  -2  -8  14 32.0275  7.4012   4
   1   8 -14 15.2438  5.1342   1
  -1  -8  14 23.6031  6.5167   4
   0   8 -14 53.6641  7.0852   1
   0  -8  14 42.9500  6.2082   4
  -1   8 -14 0.88209 5.95859   1
   1  -8  14 10.8879  6.2930   4
  -2   8 -14 52.2489  7.3002   1
   2  -8  14 41.0359  6.2234   4
  -3   8 -14 -8.3965  6.8194   1
   3  -8  14 12.1718  5.5211   4
  -3  -7  14 7.42745 6.31674   4
   2   7 -14 88.5361  6.0869   1
  -2  -7  14 76.9293  8.2945   4
   1   7 -14 203.783  10.319   1
  -1  -7  14 220.446  12.049   4
   0   7 -14 197.978  10.398   1
   0  -7  14 176.706  10.457   4
  -1   7 -14 59.5484  6.7185   1
   1  -7  14 47.8109  7.0460   4
  -2   7 -14 17.5415  6.0888   1
   2  -7  14 20.1009  4.3000   4
  -3   7 -14 41.9372  7.2541   1
   3  -7  14 32.7083  5.6721   4
  -4   7 -14 9.43815 6.31802   1
  -4  -6  14 40.4790  6.9470   4
  -3  -6  14 35.9689  6.0823   4
   2   6 -14 88.9924  5.9636   1
  -2  -6  14 82.8475  7.0997   4
   1   6 -14 122.179   7.370   1
  -1  -6  14 116.468   8.809   4
  -1  -6  14 113.026   7.064   1
   0   6 -14 69.9612  4.9551   2
   0   6 -14 84.4674  7.2072   1
   0  -6  14 76.7833  7.3694   4
  -1   6 -14 133.056   6.396   2
  -1   6 -14 153.423   9.559   1
   1  -6  14 163.296   9.055   4
  -2   6 -14 20.3422  5.1047   1
   2  -6  14 7.69869 4.71405   4
  -3   6 -14 14.2255  5.9632   1
   3  -6  14 16.2091  4.0873   4
  -4   6 -14 6.18598 5.46314   1
   4  -6  14 14.6963  3.6211   4
  -5   6 -14 14.7980  6.1307   1
  -5  -5  14 14.4260  6.0160   2
  -5  -5  14 17.7486  6.1971   4
  -4  -5  14 16.4481  4.3631   2
  -4  -5  14 28.9383  6.4206   4
   3   5 -14 37.4171  2.9566   1
  -3  -5  14 44.4459  6.2067   4
  -3  -5  14 47.6219  6.1221   2
   2   5 -14 130.707   6.631   1
  -2  -5  14 141.858   9.137   4
  -2  -5  14 133.662   6.357   1
   1   5 -14 108.303   6.667   1
  -1  -5  14 104.793   7.148   4
  -1  -5  14 104.121   6.110   1
   0   5 -14 201.367   8.084   2
   0   5 -14 219.597  10.080   1
   0  -5  14 195.714  10.292   4
  -1   5 -14 79.1922  6.6755   1
  -1   5 -14 87.6755  4.3277   2
   1  -5  14 89.1999  6.9336   4
  -2   5 -14 -6.7924  4.7928   1
   2  -5  14 -1.0096  4.2749   4
  -3   5 -14 -0.1402  1.7384   3
  -3   5 -14 -0.9772  4.5060   1
   3  -5  14 -0.2304  3.5318   4
  -4   5 -14 2.80312 5.05013   1
  -4   5 -14 7.87670 2.92045   3
   4  -5  14 2.75396 3.12893   4
  -5   5 -14 136.536   9.744   1
  -5  -4  14 110.795   9.155   2
  -5  -4  14 114.082   7.318   3
  -5  -4  14 139.656   9.362   4
  -4  -4  14 202.687  10.932   2
  -4  -4  14 190.072   8.451   3
  -4  -4  14 185.134  10.690   4
   3   4 -14 168.016   6.213   1
  -3  -4  14 175.391   9.910   4
  -3  -4  14 169.964   6.887   3
  -3  -4  14 164.199   8.615   2
   2   4 -14 9.73619 3.27968   1
  -2  -4  14 5.69220 3.81007   2
  -2  -4  14 7.30788 2.30447   1
  -2  -4  14 10.6929  1.6692   3
  -2  -4  14 10.9136  4.0316   4
   1   4 -14 15.5435  3.4665   1
  -1  -4  14 13.5758  3.5225   4
  -1  -4  14 8.93003 2.19500   1
   0   4 -14 42.7146  5.2355   1
   0  -4  14 49.3367  4.5002   1
   0  -4  14 41.6405  5.3369   4
  -1   4 -14 -0.7399  4.2108   1
   1  -4  14 5.25343 3.64427   4
  -2   4 -14 32.4433  2.5098   3
  -2   4 -14 34.6366  5.8023   1
   2  -4  14 35.0927  4.8239   4
  -3   4 -14 110.798   8.578   1
   3  -4  14 117.648   6.533   4
  -4   4 -14 51.7340  5.8768   1
   4  -4  14 62.9011  4.5869   4
  -5   4 -14 36.7130  4.9046   3
  -5   4 -14 44.3411  6.9223   1
  -6  -3  14 -2.5018  5.7353   2
  -6  -3  14 6.04365 4.89632   4
  -6  -3  14 3.57666 4.48366   3
  -5  -3  14 -10.980   5.577   4
  -5  -3  14 -4.2116  4.3852   3
  -5  -3  14 4.84535 5.21080   2
  -4  -3  14 10.8351  3.8320   2
  -4  -3  14 18.3369  3.6348   3
  -4  -3  14 20.6687  5.9259   4
   3   3 -14 349.218  10.809   1
   3   3 -14 327.804  10.637   1
  -3  -3  14 353.199  11.782   3
  -3  -3  14 335.282  13.317   2
  -3  -3  14 344.930  14.148   4
   2   3 -14 94.8375  5.2974   1
  -2  -3  14 96.0699  4.4563   3
  -2  -3  14 92.5862  5.8438   2
  -2  -3  14 94.8887  6.4431   4
  -2  -3  14 86.6896  4.7159   1
   1   3 -14 1.24665 3.06524   1
  -1  -3  14 3.19656 2.55424   1
  -1  -3  14 4.46227 4.17833   4
  -1  -3  14 -0.5714  2.4499   2
   0   3 -14 35.0127  3.8703   1
   0   3 -14 27.7551  1.9460   3
   0  -3  14 36.6651  5.0473   4
   0  -3  14 31.6335  3.4473   1
  -1   3 -14 88.3140  3.9807   3
  -1   3 -14 94.6587  6.8606   1
   1  -3  14 88.9943  6.3112   4
  -2   3 -14 97.0839  4.8555   3
  -2   3 -14 99.7940  7.4737   1
   2  -3  14 105.586   6.518   4
  -3   3 -14 53.4467  6.3916   1
   3  -3  14 42.2605  4.2825   4
  -4   3 -14 6.17938 3.82157   1
   4  -3  14 2.05507 2.70936   4
  -5   3 -14 42.8773  6.9567   1
  -6  -2  14 16.4710  4.7695   4
  -6  -2  14 21.3917  5.4002   3
  -6  -2  14 11.7662  5.8682   2
  -5  -2  14 148.975   9.769   2
  -5  -2  14 139.942   8.290   3
  -5  -2  14 143.490   9.227   4
  -4  -2  14 8.35138 3.56119   3
  -4  -2  14 16.0768  4.2506   2
  -4  -2  14 9.62217 4.10580   4
   3   2 -14 13.9344  2.0318   1
   3   2 -14 10.3808  2.1303   1
  -3  -2  14 14.3065  3.2796   3
  -3  -2  14 15.7912  4.3703   2
  -3  -2  14 21.1257  5.1539   4
   2   2 -14 239.478   8.684   3
   2   2 -14 238.929   9.156   1
  -2  -2  14 238.844   8.920   1
  -2  -2  14 251.932   8.801   3
  -2  -2  14 232.199   9.446   2
   1   2 -14 10.7453  2.0690   3
   1   2 -14 5.17111 3.19368   1
  -1  -2  14 8.12694 2.17848   2
  -1  -2  14 15.1792  2.8529   1
  -1  -2  14 12.4129  2.2597   3
   0   2 -14 7.31755 2.07309   3
   0   2 -14 16.7226  4.1430   1
   0  -2  14 11.4550  2.7342   1
   1  -2  14 10.4528  3.4909   1
  -2   2 -14 40.4313  3.7648   3
  -2   2 -14 36.6564  5.5583   1
  -3   2 -14 415.809  17.092   1
   3  -2  14 433.269  14.607   4
  -4   2 -14 28.7727  5.6148   1
   4  -2  14 22.7832  3.2340   4
  -5   2 -14 21.6864  6.1164   1
  -6  -1  14 -5.3489  4.8138   3
  -6  -1  14 -4.2019  4.8474   4
  -6  -1  14 -6.1868  4.3829   2
  -5  -1  14 -0.6586  4.4901   2
  -5  -1  14 -2.8812  4.2821   3
  -5  -1  14 5.56016 3.53653   4
  -4  -1  14 304.918  12.143   3
  -4  -1  14 326.788  13.098   4
  -4  -1  14 335.704  13.219   2
   3   1 -14 74.5754  4.1563   1
   3   1 -14 74.2871  4.1044   1
   3   1 -14 80.1308  5.2329   3
  -3  -1  14 81.2050  5.4067   3
  -3  -1  14 77.9712  5.9698   2
   2   1 -14 19.8622  3.2547   3
   2   1 -14 9.49174 2.94653   1
   2   1 -14 13.4192  2.8362   1
  -2  -1  14 13.4543  3.0260   3
  -2  -1  14 12.8737  3.0832   2
   1   1 -14 91.9230  4.6968   3
   1   1 -14 86.6638  5.8048   1
  -1  -1  14 94.8403  5.1278   3
  -1  -1  14 85.6480  5.3235   1
  -1  -1  14 87.8904  4.4474   2
   0   1 -14 589.477  17.724   3
   0   1 -14 606.564  20.043   1
   0  -1  14 576.027  19.519   1
   0  -1  14 580.495  16.069   2
  -1   1 -14 828.906  26.435   1
  -1   1 -14 812.844  23.742   3
   1  -1  14 787.672  25.987   1
  -2   1 -14 243.186   9.505   3
  -2   1 -14 237.435  11.647   1
  -3   1 -14 171.586   9.491   1
  -4   1 -14 117.971   8.714   1
  -5   1 -14 98.6942  8.0193   1
  -6   0  14 40.8477  6.3377   3
  -6   0  14 35.1915  5.6982   2
  -6   0  14 29.6387  4.8907   4
  -5   0  14 63.8743  7.1753   2
  -5   0  14 69.5596  5.7117   3
   4   0 -14 59.0124  3.3721   1
   4   0 -14 58.6876  3.2735   1
  -4   0  14 61.1305  5.8803   3
   3   0 -14 -3.1928  3.0174   1
   3   0 -14 4.98712 4.06593   3
   3   0 -14 3.34033 2.53550   1
  -3   0  14 8.07228 3.38899   3
   2   0 -14 50.3632  4.2869   3
   2   0 -14 40.3297  3.4765   1
   2   0 -14 41.8768  3.9895   1
  -2   0  14 45.1054  4.3393   3
   1   0 -14 31.0950  3.6414   3
   1   0 -14 31.7093  3.7480   1
   1   0 -14 26.0368  3.3097   1
  -1   0  14 29.4035  3.9761   3
   0   0 -14 32.5922  3.6052   3
   0   0 -14 26.5069  4.6015   1
   0   0  14 29.1348  4.0003   1
   0   0  14 28.6939  1.8890   2
  -1   0 -14 50.7069  5.4843   1
  -1   0 -14 47.1266  4.4855   3
  -2   0 -14 311.829  13.557   1
  -2   0 -14 295.948  11.700   3
  -3   0 -14 0.72088 3.81901   1
  -4   0 -14 1.55067 4.08676   1
  -5   0 -14 37.1381  7.0541   1
  -6   1  14 7.42182 4.05640   3
  -5   1  14 7.10119 4.68901   3
   4  -1 -14 833.467  25.278   1
   4  -1 -14 818.780  25.093   1
  -4   1  14 902.168  27.402   3
   3  -1 -14 110.825   6.308   1
   3  -1 -14 115.864   6.971   3
   3  -1 -14 117.009   6.016   1
  -3   1  14 112.781   7.308   3
   2  -1 -14 465.051  16.056   1
   2  -1 -14 454.139  15.712   3
   2  -1 -14 477.352  15.948   1
  -2   1  14 448.078  15.835   3
   1  -1 -14 56.2481  4.7586   3
   1  -1 -14 59.7655  4.9290   1
   1  -1 -14 60.4134  5.5117   1
  -1   1  14 56.7725  5.1528   3
   0  -1 -14 42.4890  5.7242   1
   0  -1 -14 37.4496  4.7066   1
   0  -1 -14 37.0228  4.3456   3
  -1  -1 -14 1174.10   36.15   1
  -1  -1 -14 1132.39   33.64   3
  -2  -1 -14 361.658  15.293   1
  -3  -1 -14 17.5061  4.2089   1
  -4  -1 -14 144.912  10.085   1
  -5  -1 -14 -4.8082  5.7582   1
  -6   2  14 7.54425 5.43585   3
  -5   2  14 12.2312  5.4825   3
   4  -2 -14 22.8330  3.3243   1
   4  -2 -14 22.6066  3.8163   1
  -4   2  14 15.4797  5.3221   3
   3  -2 -14 89.4691  5.6821   1
   3  -2 -14 99.6661  6.2337   1
  -3   2  14 91.3315  6.9410   3
   2  -2 -14 2.81289 3.89159   3
   2  -2 -14 7.93927 3.17293   1
   2  -2 -14 -1.1826  2.4569   1
  -2   2  14 -4.6241  4.6456   3
   1  -2 -14 832.541  25.844   3
   1  -2 -14 852.841  27.174   1
   1  -2 -14 835.074  26.870   1
  -1   2  14 850.199  26.138   3
   0  -2 -14 954.732  30.766   1
   0  -2 -14 961.884  29.080   3
  -1  -2 -14 509.901  19.304   1
   1   2  14 506.881  14.749   2
  -2  -2 -14 282.590  13.078   1
   2   2  14 312.105   9.246   2
  -3  -2 -14 70.3613  7.1878   1
   3   2  14 50.5749  4.9877   4
  -4  -2 -14 3.42949 5.45018   1
  -5  -2 -14 37.4684  7.3156   1
  -6   3  14 29.2554  6.9218   3
   5  -3 -14 4.63891 3.50239   1
  -5   3  14 -2.4865  5.4628   3
   4  -3 -14 -4.3249  3.4339   1
   4  -3 -14 4.16142 3.32583   1
  -4   3  14 1.41211 5.21937   3
   3  -3 -14 167.884   8.943   1
   3  -3 -14 156.150   8.109   1
  -3   3  14 165.212   9.387   3
   2  -3 -14 253.779  11.199   1
   2  -3 -14 258.258  11.647   1
  -2   3  14 253.899  11.126   3
   1  -3 -14 8.32994 5.43416   1
  -1   3  14 7.32009 5.12394   3
   0  -3 -14 4.43886 5.44056   1
  -1  -3 -14 517.464  19.446   1
   1   3  14 519.382  15.807   2
  -2  -3 -14 11.3311  5.1356   1
  -3  -3 -14 11.0491  5.6582   1
  -4  -3 -14 -0.3551  5.7804   1
  -6   4  14 -4.8991  6.3293   3
   5  -4 -14 39.1268  5.4263   1
  -5   4  14 35.0481  7.3392   3
   4  -4 -14 31.5409  5.6272   1
  -4   4  14 37.8292  6.9481   3
   3  -4 -14 -0.6690  5.3839   1
  -3   4  14 -1.6133  4.4761   3
   2  -4 -14 8.01061 5.23766   1
  -2   4  14 4.72423 5.50975   3
   1  -4 -14 308.724  14.127   1
   0  -4 -14 299.763  14.091   1
  -1  -4 -14 27.5960  6.2553   1
   1   4  14 35.5458  3.8257   2
  -2  -4 -14 69.3436  6.7190   1
  -3  -4 -14 187.663  11.768   1
  -4  -4 -14 -8.5127  5.1043   1
  -5   5  14 23.0585  5.1508   1
  -5   5  14 32.3511  7.3837   3
  -4   5  14 136.586   8.984   1
  -4   5  14 130.059  10.012   3
  -3   5  14 19.7367  4.7984   3
   2  -5 -14 -6.9427  4.2939   1
  -2   5  14 -4.7043  3.9794   3
   1  -5 -14 3.22538 4.49840   1
   0  -5 -14 -0.9298  5.8417   1
  -1  -5 -14 231.933  12.762   1
  -2  -5 -14 45.2107  7.3715   1
  -3  -5 -14 2.10184 6.27251   1
  -5   6  14 0.93696 4.36910   1
  -5   6  14 -5.0458  6.7010   3
  -4   6  14 23.1897  6.1235   1
  -4   6  14 3.08099 6.74123   3
  -3   6  14 -0.3227  6.0006   3
  -3   6  14 -2.8619  5.5722   1
   2  -6 -14 64.9997  6.8680   1
  -2   6  14 72.1470  7.8140   3
   1  -6 -14 48.9141  6.4718   1
   0  -6 -14 14.1016  6.4398   1
  -1  -6 -14 30.7717  7.1080   1
  -2  -6 -14 83.6959  9.4156   1
  -4   7  14 3.31138 4.33939   1
  -4   7  14 6.92951 6.93565   3
  -3   7  14 42.4288  6.1079   1
  -3   7  14 34.5274  7.7895   3
  -2   7  14 16.8938  7.1914   1
   1  -7 -14 13.1507  7.3868   1
   0  -7 -14 9.51801 6.48335   1
  -1  -7 -14 2.67261 5.20237   1
  -2  -8  15 61.9376  8.1598   4
   1   8 -15 183.802  10.517   1
  -1  -8  15 186.758  11.861   4
   0   8 -15 120.682   9.147   1
   0  -8  15 115.129   9.768   4
  -1   8 -15 15.4060  4.6972   1
   1  -8  15 25.8283  5.3555   4
  -2   8 -15 28.4715  7.2994   1
   2  -8  15 14.5626  6.1459   4
  -3   8 -15 5.01741 6.58095   1
   3  -8  15 3.21033 5.47324   4
  -3  -7  15 5.99931 6.31362   4
   2   7 -15 21.2767  4.3766   1
   1   7 -15 140.554   8.846   1
  -1  -7  15 156.814  10.270   4
   0   7 -15 153.245   8.795   1
   0  -7  15 147.578   9.977   4
  -1   7 -15 64.4115  7.4861   1
   1  -7  15 70.3789  7.3924   4
  -2   7 -15 44.6977  6.4369   1
   2  -7  15 45.7849  6.6715   4
  -3   7 -15 -0.6093  4.7844   1
   3  -7  15 -6.9455  5.1624   4
  -4   7 -15 0.20007 5.39789   1
  -3  -6  15 62.3722  7.5419   4
   2   6 -15 49.5938  4.8489   1
  -2  -6  15 51.7846  7.3427   4
   1   6 -15 88.1508  6.7909   1
  -1  -6  15 92.1117  8.0002   4
   0   6 -15 39.8358  5.5761   1
   0  -6  15 29.4166  5.8024   4
  -1   6 -15 0.68646 5.26447   1
   1  -6  15 -8.0101  5.2316   4
  -2   6 -15 93.6712  8.4626   1
   2  -6  15 97.4440  7.4053   4
  -3   6 -15 13.8789  5.5925   1
   3  -6  15 2.89992 4.31019   4
  -4   6 -15 4.12876 4.41598   1
  -4  -5  15 48.1246  6.9312   2
  -4  -5  15 61.2592  7.0180   4
  -3  -5  15 5.69456 4.52839   2
   2   5 -15 57.1976  4.7291   1
  -2  -5  15 71.0156  6.4184   4
   1   5 -15 9.96200 4.17515   1
  -1  -5  15 12.0406  3.1972   1
   0   5 -15 85.6153  6.9757   1
   0  -5  15 77.5140  6.9818   4
  -1   5 -15 54.2088  6.6072   1
   1  -5  15 46.9216  5.9891   4
  -2   5 -15 14.1020  5.5908   1
   2  -5  15 0.44268 3.54068   4
  -3   5 -15 13.5726  5.7700   1
   3  -5  15 6.45314 4.02878   4
  -4   5 -15 16.1653  5.5303   1
   4  -5  15 12.6604  3.7010   4
  -5  -4  15 0.72506 5.75270   2
  -5  -4  15 5.16822 5.53728   4
  -4  -4  15 58.8721  7.4104   4
  -4  -4  15 54.4084  6.3648   2
  -4  -4  15 58.3737  4.7047   3
   3   4 -15 64.2352  3.6719   1
  -3  -4  15 67.9919  6.4914   2
  -3  -4  15 74.7213  7.2915   4
  -3  -4  15 73.7227  4.3577   3
   2   4 -15 81.9437  5.1853   1
  -2  -4  15 86.8265  5.7619   2
  -2  -4  15 75.4581  3.5473   3
  -2  -4  15 79.9985  7.0319   4
  -2  -4  15 75.7966  4.5719   1
   1   4 -15 6.66359 3.60913   1
  -1  -4  15 9.39127 4.67762   4
  -1  -4  15 7.73658 2.51320   1
   0   4 -15 44.1881  5.3345   1
   0  -4  15 47.4130  5.7417   4
  -1   4 -15 80.2665  6.9665   1
   1  -4  15 73.7432  6.2013   4
  -2   4 -15 22.5751  5.0197   1
  -2   4 -15 23.1290  2.3209   3
   2  -4  15 28.1019  4.1621   4
  -3   4 -15 104.438   7.860   1
   3  -4  15 114.869   6.970   4
  -4   4 -15 77.4971  7.6774   1
   4  -4  15 71.0382  5.1876   4
  -5   4 -15 -1.4268  4.1852   1
  -5   4 -15 6.94658 3.69549   3
  -5  -3  15 147.149   8.365   3
  -5  -3  15 155.568   9.979   4
  -5  -3  15 135.321   9.458   2
  -4  -3  15 21.1188  5.3496   4
  -4  -3  15 12.8297  3.4809   3
  -4  -3  15 16.0201  5.1399   2
   3   3 -15 36.4092  3.0945   1
  -3  -3  15 37.7930  5.7505   4
  -3  -3  15 35.0541  5.2527   2
  -3  -3  15 38.1969  3.7300   3
   2   3 -15 -0.3231  2.7473   1
  -2  -3  15 1.06337 1.99154   3
  -2  -3  15 1.58175 3.25308   2
  -2  -3  15 0.55692 4.66709   4
  -2  -3  15 1.83984 2.00432   1
   1   3 -15 129.252   4.879   3
   1   3 -15 133.528   7.085   1
  -1  -3  15 126.883   6.543   1
  -1  -3  15 135.282   6.109   2
  -1  -3  15 136.624   8.224   4
   0   3 -15 329.332  12.814   1
   0   3 -15 293.665   9.296   3
   0  -3  15 300.531  12.161   1
   0  -3  15 315.013  12.478   4
  -1   3 -15 65.5319  3.4166   3
  -1   3 -15 59.2721  5.3841   1
   1  -3  15 65.2576  5.8804   4
  -2   3 -15 267.443  12.394   1
  -2   3 -15 292.517   9.810   3
   2  -3  15 281.167  11.490   4
  -3   3 -15 50.9495  4.3342   3
  -3   3 -15 48.3389  6.7748   1
   3  -3  15 55.1550  5.0560   4
  -4   3 -15 150.103  10.405   1
   4  -3  15 181.953   7.821   4
  -5   3 -15 3.04241 5.68908   1
  -6  -2  15 16.9598  5.5933   4
  -6  -2  15 23.6368  6.5790   2
  -5  -2  15 32.0617  6.5916   2
  -5  -2  15 32.9400  5.1121   3
  -5  -2  15 39.6562  6.4729   4
  -4  -2  15 47.4166  4.8316   3
  -4  -2  15 45.8445  6.3522   4
  -4  -2  15 35.7679  5.8289   2
   3   2 -15 55.4532  3.3950   1
   3   2 -15 59.4964  3.5050   1
  -3  -2  15 55.7143  4.4797   3
  -3  -2  15 47.9765  6.1353   4
  -3  -2  15 47.8321  4.6183   2
   2   2 -15 -2.0104  2.7326   1
   2   2 -15 -0.4262  2.2323   3
  -2  -2  15 4.97854 2.09631   1
  -2  -2  15 4.32757 2.48685   3
  -2  -2  15 3.50062 3.04244   2
   1   2 -15 134.465   6.989   1
   1   2 -15 129.887   5.464   3
  -1  -2  15 118.445   6.159   1
  -1  -2  15 129.739   5.728   2
   0   2 -15 23.3738  2.6500   3
   0   2 -15 24.4378  4.4370   1
   0  -2  15 21.0943  3.8241   1
  -1   2 -15 39.0709  5.3797   1
  -1   2 -15 35.8211  3.3001   3
  -2   2 -15 273.483  10.138   3
  -2   2 -15 279.384  12.927   1
  -3   2 -15 39.8433  4.2979   3
  -3   2 -15 32.5976  5.7851   1
   3  -2  15 30.3387  4.3561   4
  -4   2 -15 71.9388  7.4616   1
   4  -2  15 64.4885  4.7179   4
  -6  -1  15 5.61909 3.69782   4
  -6  -1  15 19.0743  6.6613   2
  -6  -1  15 -0.7021  4.7201   3
  -5  -1  15 63.4499  6.1240   3
  -5  -1  15 61.2624  7.2427   2
  -5  -1  15 62.7767  6.9019   4
  -4  -1  15 16.7097  5.1652   2
   3   1 -15 154.291   6.551   1
   3   1 -15 147.281   6.319   1
   3   1 -15 151.832   7.507   3
  -3  -1  15 161.729   7.769   3
  -3  -1  15 151.780   8.125   2
   2   1 -15 52.1374  4.0161   1
   2   1 -15 45.8887  3.6679   3
   2   1 -15 40.6552  4.2511   1
  -2  -1  15 45.0611  3.7847   3
  -2  -1  15 44.5427  4.1400   2
   1   1 -15 85.1379  4.8388   3
   1   1 -15 80.0139  5.3644   1
  -1  -1  15 80.0545  4.8768   3
  -1  -1  15 85.1004  4.2994   2
  -1  -1  15 82.4428  5.3492   1
   0   1 -15 235.840  10.659   1
   0   1 -15 230.102   8.868   3
   0  -1  15 246.738  10.504   1
  -1   1 -15 3.78127 4.66154   1
  -1   1 -15 6.58292 2.88489   3
  -2   1 -15 342.184  12.549   3
  -2   1 -15 353.403  15.023   1
  -3   1 -15 7.59278 4.53091   1
  -4   1 -15 31.8445  5.1412   1
  -5   1 -15 38.0901  5.8520   1
  -6   0  15 0.84829 3.53440   3
  -6   0  15 -5.1818  6.1173   2
  -5   0  15 54.2608  6.9713   2
  -5   0  15 41.4302  5.7282   3
   4   0 -15 23.8965  2.5482   1
  -4   0  15 21.0305  4.9632   3
   3   0 -15 33.5328  3.5293   1
   3   0 -15 34.7783  4.4451   3
   3   0 -15 33.0363  3.6882   1
  -3   0  15 39.5583  4.2665   3
   2   0 -15 586.346  18.871   1
   2   0 -15 566.557  18.244   3
   2   0 -15 548.586  18.366   1
  -2   0  15 565.050  18.406   3
   1   0 -15 427.422  15.548   1
   1   0 -15 463.989  16.113   1
   1   0 -15 438.649  14.728   3
  -1   0  15 433.672  14.822   3
   0   0 -15 106.763   5.675   3
   0   0 -15 108.263   7.510   1
   0   0 -15 102.625   6.819   1
   0   0  15 117.072   4.043   2
  -1   0 -15 301.682  11.436   3
  -1   0 -15 307.246  13.371   1
  -2   0 -15 72.6521  7.1549   1
  -2   0 -15 70.5139  5.6237   3
  -3   0 -15 127.076   8.748   1
  -4   0 -15 104.459   8.681   1
  -5   0 -15 60.6027  7.9941   1
  -6   1  15 0.31324 5.33076   3
  -5   1  15 -7.8194  4.6700   3
   4  -1 -15 11.5667  3.1400   1
  -4   1  15 12.8972  5.3460   3
   3  -1 -15 11.7956  3.4226   1
  -3   1  15 12.7333  4.6623   3
   2  -1 -15 15.9584  3.8885   1
  -2   1  15 13.8392  4.5698   3
   1  -1 -15 4.40144 2.58022   1
   1  -1 -15 3.24175 3.64450   3
  -1   1  15 7.65933 3.57701   3
   0  -1 -15 1031.72   31.31   3
   0  -1 -15 1102.99   33.76   1
  -1  -1 -15 66.1895  5.3241   3
  -1  -1 -15 62.3163  6.8193   1
  -2  -1 -15 382.676  16.289   1
  -3  -1 -15 -1.2219  4.6123   1
  -4  -1 -15 50.1960  6.1901   1
  -5  -1 -15 23.8095  6.7537   1
  -6   2  15 19.0657  6.2126   3
  -5   2  15 23.9519  5.7659   3
   4  -2 -15 58.5872  4.8874   1
  -4   2  15 45.6960  5.7431   3
   3  -2 -15 133.519   7.095   1
   3  -2 -15 124.142   7.285   1
  -3   2  15 119.873   7.254   3
   2  -2 -15 141.416   7.993   1
   2  -2 -15 118.091   7.268   1
  -2   2  15 127.388   7.814   3
   1  -2 -15 12.2133  5.2887   1
  -1   2  15 3.42467 4.92007   3
   0  -2 -15 416.615  16.813   1
  -1  -2 -15 168.809  10.455   1
   1   2  15 184.150   6.285   2
  -2  -2 -15 4.29768 4.93821   1
  -3  -2 -15 54.5566  6.9920   1
  -4  -2 -15 45.4222  7.0519   1
  -6   3  15 12.3364  4.9043   3
   5  -3 -15 32.5086  4.3819   1
  -5   3  15 23.3296  5.1038   3
  -4   3  15 1.33784 4.36491   3
   3  -3 -15 7.39067 4.82104   1
  -3   3  15 18.5031  5.6342   3
   2  -3 -15 201.193  10.566   1
  -2   3  15 191.943   9.762   3
   1  -3 -15 310.939  13.313   1
   0  -3 -15 314.604  13.772   1
  -1  -3 -15 196.599  10.859   1
   1   3  15 184.805   7.336   2
  -2  -3 -15 12.6042  5.6370   1
  -3  -3 -15 1.47860 5.24218   1
  -4  -3 -15 5.97662 4.68195   1
   5  -4 -15 85.2669  6.9404   1
  -5   4  15 77.0435  7.3418   3
   4  -4 -15 85.4132  7.1916   1
  -4   4  15 57.6903  7.4528   3
   3  -4 -15 330.882  13.996   1
  -3   4  15 330.207  14.898   3
   2  -4 -15 0.97556 5.24047   1
  -2   4  15 1.15018 5.24827   3
   1  -4 -15 156.626   9.455   1
   0  -4 -15 15.4161  4.8003   1
  -1  -4 -15 0.95902 5.36435   1
  -2  -4 -15 26.9881  6.3255   1
   5  -5 -15 7.26111 5.65131   1
  -5   5  15 10.6139  6.3734   3
   4  -5 -15 6.53888 5.91628   1
  -4   5  15 3.27880 6.55143   3
   3  -5 -15 0.13350 5.79837   1
  -3   5  15 -0.9752  4.2063   3
   2  -5 -15 137.346   9.894   1
  -2   5  15 126.634   8.758   3
   1  -5 -15 81.6492  8.5816   1
   0  -5 -15 211.833  12.378   1
  -1  -5 -15 6.00496 5.27771   1
  -2  -5 -15 169.864  11.879   1
  -3  -5 -15 17.3867  7.2284   1
  -4   6  15 -5.3682  5.6346   1
  -4   6  15 11.8415  7.1332   3
   3  -6 -15 17.6060  6.4924   1
  -3   6  15 23.4066  6.9677   3
   2  -6 -15 16.5473  6.9945   1
  -2   6  15 17.9447  6.4918   3
   1  -6 -15 34.1022  7.6276   1
   0  -6 -15 20.7481  6.6772   1
  -1  -6 -15 51.2812  7.6327   1
  -2  -6 -15 0.75665 6.80575   1
  -3   7  15 45.6801  8.0537   1
  -3   7  15 52.1928  8.2668   3
   2  -7 -15 42.1986  6.8250   1
   1  -7 -15 -11.615   7.296   1
   0  -7 -15 12.7056  6.7796   1
   1   8 -16 3.66380 4.90752   1
   0   8 -16 -1.9830  4.6734   1
   0  -8  16 -3.1439  6.3492   4
  -1   8 -16 83.6480  8.7138   1
   1  -8  16 94.7216  8.8591   4
  -2   8 -16 27.2263  7.1857   1
   2  -8  16 38.9958  6.8627   4
  -3  -7  16 68.2007  7.2180   4
  -2  -7  16 208.030  11.639   4
   1   7 -16 51.6992  5.5129   1
  -1  -7  16 53.3676  7.8320   4
   0   7 -16 8.51035 5.57424   1
   0  -7  16 10.7876  6.5628   4
  -1   7 -16 2.98357 5.03672   1
   1  -7  16 1.58336 5.57380   4
  -2   7 -16 4.17216 6.17681   1
   2  -7  16 0.68472 5.40686   4
  -3   7 -16 26.6395  7.2233   1
   3  -7  16 13.4883  5.1103   4
  -3  -6  16 -4.7515  4.7293   4
   2   6 -16 43.4685  4.6503   1
  -2  -6  16 31.0408  6.1344   4
   1   6 -16 148.439   8.448   1
  -1  -6  16 143.747   9.970   4
   0   6 -16 141.368   9.081   1
   0  -6  16 140.828   9.655   4
  -1   6 -16 56.9207  6.8388   1
   1  -6  16 66.8456  6.6559   4
  -2   6 -16 47.7907  6.0777   1
   2  -6  16 29.7412  5.8189   4
  -3   6 -16 -4.2632  5.9844   1
   3  -6  16 4.65709 4.41538   4
  -4   6 -16 62.5457  8.4144   1
  -4  -5  16 25.5459  6.0321   2
  -4  -5  16 25.0092  6.5790   4
  -3  -5  16 40.9292  6.9149   4
  -3  -5  16 46.2297  5.9543   2
   2   5 -16 65.7699  4.9924   1
  -2  -5  16 62.1215  7.3734   4
   1   5 -16 17.2433  3.6222   1
  -1  -5  16 15.7701  4.8360   4
   0   5 -16 49.2338  5.8223   1
   0  -5  16 58.1162  6.8943   4
  -1   5 -16 250.743  12.279   1
   1  -5  16 247.182  11.780   4
  -2   5 -16 126.186   9.609   1
   2  -5  16 139.404   8.579   4
  -3   5 -16 13.2196  6.0749   1
   3  -5  16 8.48925 4.10023   4
  -4   5 -16 38.4230  7.0529   1
  -5  -4  16 -2.5417  5.6592   2
  -5  -4  16 9.44841 6.04242   4
  -4  -4  16 31.5798  5.9658   2
  -4  -4  16 33.7778  5.7310   4
  -3  -4  16 59.6185  7.0753   4
  -3  -4  16 59.6560  6.1084   2
   2   4 -16 15.3107  3.3730   1
  -2  -4  16 14.4644  4.0871   2
  -2  -4  16 4.58810 3.64503   4
   1   4 -16 5.98905 3.83709   1
  -1  -4  16 -5.1664  4.8693   4
  -1  -4  16 -3.5324  2.7805   1
   0   4 -16 222.369  10.593   1
   0  -4  16 211.813  10.288   4
  -1   4 -16 21.7066  4.3720   1
   1  -4  16 22.0148  5.0421   4
  -2   4 -16 12.9723  5.5978   1
   2  -4  16 25.2529  4.9899   4
  -3   4 -16 100.018   7.952   1
   3  -4  16 105.217   6.928   4
  -4   4 -16 68.5340  8.0243   1
  -5  -3  16 84.8851  8.5028   2
  -5  -3  16 77.5311  6.1940   3
  -5  -3  16 87.3895  7.9336   4
  -4  -3  16 3.39001 2.89638   3
  -4  -3  16 8.27742 5.16702   2
  -4  -3  16 2.55210 5.28471   4
   3   3 -16 60.4229  3.7799   1
  -3  -3  16 68.3206  4.6422   3
  -3  -3  16 59.6668  5.9308   2
  -3  -3  16 79.3886  7.2749   4
   2   3 -16 9.96438 3.08358   1
  -2  -3  16 11.3934  5.2087   4
  -2  -3  16 7.39761 2.14441   3
  -2  -3  16 8.86664 2.41349   1
   1   3 -16 55.8675  3.0154   3
   1   3 -16 61.9038  5.3578   1
  -1  -3  16 62.7371  4.2424   2
  -1  -3  16 69.8828  6.5820   4
  -1  -3  16 57.0877  4.6617   1
   0   3 -16 3.14899 3.97562   1
   0  -3  16 2.30987 3.17134   4
  -1   3 -16 234.640  11.463   1
  -1   3 -16 246.179   8.230   3
   1  -3  16 244.036  11.072   4
  -2   3 -16 302.856  10.362   3
  -2   3 -16 296.034  13.307   1
   2  -3  16 293.695  12.247   4
  -3   3 -16 203.959  11.792   1
   3  -3  16 192.508   9.250   4
  -4   3 -16 8.72555 5.25187   1
   4  -3  16 4.10897 3.18614   4
  -5   3 -16 -2.3982  5.2090   1
  -5  -2  16 31.6950  6.4545   4
  -5  -2  16 23.3437  4.5344   3
  -5  -2  16 16.2238  4.7569   2
  -4  -2  16 30.5711  5.8752   4
  -4  -2  16 22.1816  4.4920   2
  -4  -2  16 21.4985  3.3211   3
   3   2 -16 201.397   7.768   1
  -3  -2  16 196.630   8.448   3
  -3  -2  16 197.294   9.592   2
  -3  -2  16 201.550  10.689   4
   2   2 -16 28.7611  3.5400   1
   2   2 -16 37.3511  3.8699   1
   2   2 -16 33.3338  3.3800   3
  -2  -2  16 32.1580  3.3501   3
  -2  -2  16 28.8110  3.7827   2
   1   2 -16 60.9676  5.2840   1
   1   2 -16 51.3058  3.5825   3
  -1  -2  16 52.2338  3.7447   2
  -1  -2  16 46.6381  4.3083   1
   0   2 -16 80.9688  6.3674   1
   0   2 -16 83.8617  4.4808   3
  -1   2 -16 56.5457  4.0484   3
  -1   2 -16 62.4994  6.3632   1
  -2   2 -16 137.432   9.213   1
  -2   2 -16 139.565   6.611   3
  -3   2 -16 172.140  10.622   1
  -3   2 -16 155.079   7.884   3
   3  -2  16 149.458   8.010   4
  -4   2 -16 1.99724 4.62962   1
   4  -2  16 1.60079 2.99753   4
  -5   2 -16 144.685  10.869   1
  -6  -1  16 9.57232 5.03854   3
  -6  -1  16 6.66842 5.58164   4
  -5  -1  16 61.9128  7.3360   2
  -5  -1  16 41.4073  6.8122   4
  -5  -1  16 42.1638  5.5366   3
  -4  -1  16 12.7119  4.0355   3
  -4  -1  16 6.71600 3.59791   2
   3   1 -16 64.7011  4.9524   3
   3   1 -16 66.8318  4.4929   1
   3   1 -16 59.7869  4.2017   1
  -3  -1  16 60.4912  5.0536   2
  -3  -1  16 66.6860  5.4104   3
   2   1 -16 23.4358  3.9289   1
   2   1 -16 22.7597  3.5300   1
   2   1 -16 20.8959  3.5764   3
  -2  -1  16 24.2122  3.3640   2
  -2  -1  16 22.4114  3.3669   3
   1   1 -16 326.690  11.370   3
   1   1 -16 330.190  12.860   1
   1   1 -16 308.825  12.228   1
  -1  -1  16 315.928  10.538   2
   0   1 -16 11.7991  2.9772   3
   0   1 -16 17.8960  4.4804   1
  -1   1 -16 156.165   9.113   1
  -1   1 -16 154.227   7.142   3
  -2   1 -16 4.33896 3.64784   1
  -2   1 -16 -2.8979  3.6771   3
  -3   1 -16 115.455   8.648   1
  -4   1 -16 10.4942  5.3525   1
  -5   1 -16 33.9546  6.8853   1
  -6   0  16 1.63612 5.81119   2
  -6   0  16 -2.3427  4.9315   3
  -6   0  16 8.00623 5.33999   4
  -5   0  16 21.7284  6.0659   2
  -5   0  16 10.3735  5.0448   3
   4   0 -16 248.778   9.239   1
  -4   0  16 266.099  11.608   3
  -4   0  16 254.945  12.008   2
   3   0 -16 13.4252  3.2366   1
   3   0 -16 17.5317  3.6753   3
   3   0 -16 17.3059  3.1352   1
  -3   0  16 19.6401  4.3739   3
   2   0 -16 30.3205  4.3052   3
   2   0 -16 26.5626  4.5481   1
   2   0 -16 21.6961  3.8118   1
  -2   0  16 22.1163  4.5433   3
   1   0 -16 -0.0989  3.2983   1
   1   0 -16 10.0279  3.1292   3
   1   0 -16 7.88791 4.06617   1
  -1   0  16 3.71066 2.19908   2
   0   0 -16 73.6641  6.4921   1
   0   0 -16 63.0650  4.9149   3
  -1   0 -16 364.501  15.210   1
  -1   0 -16 341.358  12.842   3
  -2   0 -16 12.8507  5.0240   1
  -3   0 -16 11.5839  5.2629   1
  -4   0 -16 120.009   9.557   1
  -6   1  16 15.0302  5.0832   3
   4  -1 -16 7.08981 2.96115   1
  -4   1  16 9.58421 3.72947   3
   3  -1 -16 313.054  11.822   1
   3  -1 -16 314.070  12.087   1
  -3   1  16 299.667  12.264   3
   2  -1 -16 83.6737  5.6384   3
   2  -1 -16 80.5428  5.8975   1
   2  -1 -16 91.0179  6.4680   1
  -2   1  16 88.8041  6.3115   3
   1  -1 -16 5.14052 4.36620   1
   1  -1 -16 8.06843 3.81745   3
   1  -1 -16 10.5919  4.3740   1
  -1   1  16 14.3054  3.3832   3
   0  -1 -16 185.072   8.939   3
   0  -1 -16 193.050  10.610   1
  -1  -1 -16 59.3140  5.7751   1
  -2  -1 -16 115.799   8.176   1
  -3  -1 -16 8.77390 4.15449   1
  -4  -1 -16 13.0301  6.2636   1
  -5   2  16 -7.7828  5.6185   3
   4  -2 -16 41.7757  4.5029   1
  -4   2  16 40.1932  6.1679   3
   3  -2 -16 9.35693 3.08551   1
  -3   2  16 4.54938 4.81458   3
   2  -2 -16 104.304   6.787   1
  -2   2  16 98.8972  6.9757   3
   1  -2 -16 166.930   8.979   1
   0  -2 -16 328.941  14.604   1
  -1  -2 -16 342.636  15.283   1
  -2  -2 -16 20.7647  5.6079   1
  -3  -2 -16 11.4274  5.4745   1
  -4  -2 -16 33.7324  7.1666   1
  -5   3  16 56.0171  7.5852   3
   4  -3 -16 78.0427  6.1192   1
  -4   3  16 73.0446  7.7139   3
   3  -3 -16 57.8827  6.2114   1
  -3   3  16 84.2150  7.4536   3
   2  -3 -16 0.41289 3.58142   1
  -2   3  16 5.06264 5.02071   3
   1  -3 -16 134.445   9.113   1
   0  -3 -16 119.541   8.324   1
  -1  -3 -16 -2.8196  4.7616   1
  -2  -3 -16 7.92623 5.61212   1
  -3  -3 -16 -2.2607  4.2723   1
   5  -4 -16 6.59096 4.93034   1
  -5   4  16 -0.4067  6.0384   3
   4  -4 -16 2.55989 4.81386   1
  -4   4  16 8.98567 4.72489   3
   3  -4 -16 10.6443  5.7961   1
  -3   4  16 3.16297 6.16204   3
   2  -4 -16 35.2551  6.6381   1
  -2   4  16 26.8928  6.4013   3
   1  -4 -16 51.2164  7.3258   1
   0  -4 -16 280.901  13.968   1
  -1  -4 -16 288.578  14.678   1
  -2  -4 -16 103.225   9.571   1
  -3  -4 -16 1.33860 5.92961   1
   5  -5 -16 68.2701  7.2345   1
  -5   5  16 67.5417  7.3155   3
   4  -5 -16 34.8054  6.8969   1
  -4   5  16 53.7116  8.2183   3
   3  -5 -16 7.95686 5.10138   1
  -3   5  16 4.42834 4.61943   3
   2  -5 -16 9.50333 5.85468   1
  -2   5  16 1.87329 6.12557   3
   1  -5 -16 8.66050 6.30850   1
   0  -5 -16 18.0550  7.2241   1
  -1  -5 -16 22.6646  5.3649   1
  -2  -5 -16 13.8272  6.7433   1
   4  -6 -16 7.06225 4.93327   1
  -4   6  16 3.09892 6.73181   3
   3  -6 -16 2.58117 6.31721   1
  -3   6  16 9.45412 6.75762   3
   2  -6 -16 23.3932  5.5821   1
   1  -6 -16 -3.9113  6.7767   1
   0  -6 -16 5.64741 6.79746   1
  -1  -6 -16 190.064  11.988   1
   2  -7 -16 3.84027 7.35453   1
   1  -7 -16 29.3718  6.3793   1
   0   8 -17 1.54645 5.88963   1
   0  -8  17 -4.4907  5.9233   4
  -1   8 -17 6.65622 4.90914   1
   1  -8  17 -1.2775  5.6192   4
   1   7 -17 -2.6063  4.9751   1
  -1  -7  17 6.83847 4.82966   4
   0   7 -17 250.281  12.598   1
   0  -7  17 247.125  12.861   4
  -1   7 -17 74.6371  8.2248   1
   1  -7  17 73.7771  8.0682   4
  -2   7 -17 2.65700 4.57833   1
  -3   7 -17 53.1625  8.1873   1
   3  -7  17 39.1552  6.4452   4
  -3  -6  17 38.7081  7.2777   4
  -2  -6  17 9.59292 6.19951   4
   1   6 -17 6.25589 3.63555   1
  -1  -6  17 0.41776 4.92906   4
   0   6 -17 52.9279  6.8755   1
   0  -6  17 67.9299  7.3182   4
  -1   6 -17 21.0112  6.1382   1
  -2   6 -17 164.579  11.106   1
   2  -6  17 159.620   9.817   4
  -3   6 -17 9.99973 6.18451   1
   3  -6  17 -1.0840  4.1394   4
  -4  -5  17 8.16172 4.91144   2
  -4  -5  17 4.11039 5.55672   4
  -3  -5  17 31.8456  5.7213   2
   2   5 -17 31.2700  4.1759   1
  -2  -5  17 15.5317  5.7927   4
   1   5 -17 47.7600  5.5998   1
  -1  -5  17 40.7867  6.9389   4
   0   5 -17 226.459  11.646   1
   0  -5  17 228.109  11.973   4
  -1   5 -17 -2.8439  5.0630   1
   1  -5  17 8.71946 4.60753   4
  -2   5 -17 61.0801  7.2736   1
   2  -5  17 48.5606  6.2218   4
  -3   5 -17 78.2675  7.4061   1
   3  -5  17 67.0217  6.3573   4
  -4   5 -17 10.8666  6.4959   1
  -4  -4  17 89.3855  7.7604   2
  -4  -4  17 59.5820  7.5591   4
  -3  -4  17 5.09671 4.04328   4
  -3  -4  17 -4.3942  4.0228   2
   2   4 -17 -4.3636  3.2652   1
  -2  -4  17 -4.5447  5.1910   4
  -2  -4  17 3.10772 3.08578   2
   1   4 -17 111.376   7.584   1
  -1  -4  17 121.022   7.918   4
   0   4 -17 219.890  10.331   1
   0  -4  17 208.449  11.305   4
  -1   4 -17 175.629  10.103   1
   1  -4  17 166.810   9.483   4
  -2   4 -17 65.2778  7.5910   1
   2  -4  17 68.1564  6.5646   4
  -3   4 -17 13.7891  5.7294   1
   3  -4  17 3.05601 4.14690   4
  -4   4 -17 -1.4789  5.6392   1
  -5  -3  17 6.80127 5.80889   2
  -5  -3  17 4.67938 6.17703   4
  -4  -3  17 29.8049  5.3612   2
  -4  -3  17 31.2499  6.5571   4
   3   3 -17 48.9730  3.8736   1
  -3  -3  17 44.8742  5.4355   2
  -3  -3  17 53.0053  4.0522   3
  -3  -3  17 42.4094  6.5742   4
   2   3 -17 38.9726  4.2750   1
  -2  -3  17 41.6546  4.2721   2
  -2  -3  17 40.3681  3.2050   3
  -2  -3  17 44.1953  6.4754   4
   1   3 -17 118.988   4.861   3
   1   3 -17 130.088   7.345   1
  -1  -3  17 129.869   8.655   4
  -1  -3  17 106.169   6.699   1
   0   3 -17 55.7602  3.1367   3
   0   3 -17 47.9785  5.9797   1
   0  -3  17 59.3199  5.5653   4
  -1   3 -17 250.995  12.256   1
   1  -3  17 266.160  11.934   4
  -2   3 -17 2.84367 3.75370   1
   2  -3  17 10.1759  4.3371   4
  -3   3 -17 128.638  10.011   1
   3  -3  17 117.796   7.500   4
  -4   3 -17 25.7993  5.9226   1
  -5  -2  17 25.3233  6.2687   2
  -5  -2  17 30.4840  7.0406   4
  -5  -2  17 25.9323  3.9204   3
  -4  -2  17 1.69985 4.53203   2
  -4  -2  17 7.13933 3.65648   3
  -4  -2  17 16.5822  5.1895   4
   3   2 -17 -0.3275  2.4666   1
  -3  -2  17 3.48364 3.95233   2
  -3  -2  17 6.23843 3.32906   3
  -3  -2  17 -2.3189  4.8809   4
   2   2 -17 25.3662  3.5594   1
   2   2 -17 36.5059  3.9935   1
   2   2 -17 30.4699  3.2669   3
  -2  -2  17 29.2072  3.5852   3
  -2  -2  17 34.2720  3.9429   2
   1   2 -17 115.723   7.058   1
   1   2 -17 106.200   5.197   3
  -1  -2  17 103.936   6.428   1
  -1  -2  17 109.797   5.237   2
   0   2 -17 190.563   7.568   3
   0   2 -17 202.882   9.738   1
  -1   2 -17 46.1491  5.3451   1
  -1   2 -17 57.1810  4.0873   3
  -2   2 -17 159.696  10.094   1
  -3   2 -17 15.7264  5.7181   1
   3  -2  17 24.4583  4.3148   4
  -4   2 -17 4.50522 3.98771   1
  -5  -1  17 22.7285  5.8698   2
  -5  -1  17 7.40712 5.75001   4
  -5  -1  17 23.1341  4.6931   3
  -4  -1  17 63.9859  6.7835   2
  -4  -1  17 70.1638  6.2076   3
   3   1 -17 198.223   8.304   1
   3   1 -17 183.050   8.793   3
  -3  -1  17 196.647   9.099   3
  -3  -1  17 213.218   9.763   2
   2   1 -17 2.41276 3.09825   1
   2   1 -17 2.94543 2.82258   1
   2   1 -17 3.31517 3.22835   3
  -2  -1  17 3.12874 2.75942   2
  -2  -1  17 5.36126 3.35361   3
   1   1 -17 85.8169  5.3330   3
   1   1 -17 72.5290  5.5071   1
   1   1 -17 77.7392  6.1792   1
  -1  -1  17 80.0026  4.2858   2
   0   1 -17 1.84636 4.28481   1
   0   1 -17 3.88713 2.50547   3
  -1   1 -17 210.953   8.985   3
  -1   1 -17 216.343  11.472   1
  -2   1 -17 31.5049  3.8505   3
  -2   1 -17 41.5509  6.0563   1
  -3   1 -17 8.02830 5.47348   1
  -4   1 -17 101.074   9.069   1
  -5   0  17 4.16454 4.71982   3
  -5   0  17 0.85538 5.17155   2
  -4   0  17 21.6443  5.4404   3
  -4   0  17 26.3119  5.2777   2
   3   0 -17 28.0419  3.8922   1
  -3   0  17 25.6510  4.9664   3
  -3   0  17 31.9307  5.0193   2
   2   0 -17 499.669  17.489   1
   2   0 -17 485.844  16.526   3
   2   0 -17 480.902  16.908   1
  -2   0  17 474.243  16.483   3
  -2   0  17 480.126  16.097   2
   1   0 -17 130.469   8.023   1
   1   0 -17 127.049   7.053   3
  -1   0  17 123.877   5.576   2
   0   0 -17 36.9189  5.6487   1
   0   0 -17 35.9123  4.1950   3
  -1   0 -17 2.45496 4.67086   1
  -1   0 -17 2.68922 3.44865   3
  -2   0 -17 36.0447  6.4573   1
  -3   0 -17 56.7504  6.2928   1
  -4   0 -17 29.6346  5.6458   1
  -5   1  17 8.62670 5.29470   3
   4  -1 -17 21.5615  3.2841   1
  -4   1  17 13.8841  5.1697   3
   3  -1 -17 1.22661 3.34215   1
   3  -1 -17 -1.9248  3.7625   1
  -3   1  17 6.11598 4.54990   3
   2  -1 -17 -0.8465  3.0421   1
   2  -1 -17 2.48737 3.73585   1
  -2   1  17 0.43200 4.38909   3
   1  -1 -17 -0.9584  4.5673   1
   0  -1 -17 340.121  14.710   1
  -1  -1 -17 -7.1400  4.9305   1
  -2  -1 -17 41.4191  6.6571   1
  -3  -1 -17 191.330  11.925   1
  -4  -1 -17 128.586  10.509   1
  -5   2  17 5.95720 5.48380   3
   4  -2 -17 39.2374  4.9061   1
  -4   2  17 45.5283  5.2506   3
   3  -2 -17 -1.4611  3.1012   1
  -3   2  17 -4.7630  4.7740   3
   2  -2 -17 -0.2017  4.4124   1
  -2   2  17 0.34817 4.62698   3
   1  -2 -17 39.3167  6.0420   1
   0  -2 -17 40.8621  6.6948   1
  -1  -2 -17 -2.8818  5.4527   1
  -2  -2 -17 29.0732  6.4779   1
  -3  -2 -17 26.6797  6.5682   1
  -5   3  17 13.3587  6.2617   3
   4  -3 -17 71.5353  6.6501   1
  -4   3  17 70.1932  7.7927   3
   3  -3 -17 81.6239  7.2081   1
  -3   3  17 69.0518  6.9011   3
   2  -3 -17 5.82757 5.02897   1
  -2   3  17 1.19739 4.95220   3
   1  -3 -17 117.989   8.954   1
   0  -3 -17 60.0183  7.6207   1
  -1  -3 -17 55.0982  6.3584   1
  -2  -3 -17 49.9471  7.0359   1
  -3  -3 -17 55.5876  8.0100   1
  -5   4  17 49.2561  7.8264   3
   4  -4 -17 29.1088  5.5798   1
  -4   4  17 18.9066  6.0368   3
   3  -4 -17 9.28795 5.56124   1
  -3   4  17 7.02367 6.11262   3
   2  -4 -17 48.7967  6.8801   1
  -2   4  17 36.5709  6.6206   3
   1  -4 -17 86.4735  8.6113   1
   0  -4 -17 47.4389  7.7825   1
  -1  -4 -17 6.36724 6.89874   1
  -2  -4 -17 6.07920 6.23793   1
   4  -5 -17 5.40618 5.34767   1
  -4   5  17 8.98115 7.08846   3
   3  -5 -17 47.6301  7.6829   1
  -3   5  17 48.4330  6.4406   3
   2  -5 -17 17.8613  6.5557   1
  -2   5  17 12.9194  6.2068   3
   1  -5 -17 4.55386 4.69516   1
   0  -5 -17 242.139  13.330   1
  -1  -5 -17 162.288  10.893   1
   3  -6 -17 13.7703  7.0713   1
  -3   6  17 -10.132   6.847   3
   2  -6 -17 42.0598  8.2482   1
   1  -6 -17 20.7900  5.7523   1
   0  -6 -17 24.1152  7.2199   1
   1   7 -18 -3.5427  4.9471   1
  -1  -7  18 1.18599 6.48345   4
   0   7 -18 6.41302 5.80209   1
   0  -7  18 -0.9551  6.2998   4
  -1   7 -18 0.43859 4.38922   1
   1  -7  18 1.32012 5.67603   4
  -2   7 -18 6.30694 6.48137   1
   2  -7  18 0.77779 5.61873   4
  -2  -6  18 9.96460 4.66249   4
   1   6 -18 147.791   9.026   1
  -1  -6  18 145.835  10.628   4
   0   6 -18 -1.9833  5.2761   1
   0  -6  18 10.0851  6.3470   4
  -1   6 -18 28.9266  6.5467   1
   1  -6  18 23.1958  5.0503   4
  -2   6 -18 110.428  10.019   1
   2  -6  18 117.126   8.693   4
  -3   6 -18 32.7090  6.0014   1
   3  -6  18 37.5993  6.0557   4
  -3  -5  18 1.51491 4.30233   4
   2   5 -18 12.3801  4.0171   1
  -2  -5  18 4.41924 5.19603   4
   1   5 -18 73.4596  6.4313   1
  -1  -5  18 64.4439  7.9120   4
   0   5 -18 292.688  13.233   1
   0  -5  18 270.654  13.441   4
  -1   5 -18 76.8525  8.1308   1
   1  -5  18 77.7284  7.6558   4
  -2   5 -18 36.0436  5.8676   1
   2  -5  18 33.2792  6.0617   4
  -3   5 -18 9.76866 5.51243   1
   3  -5  18 6.61607 4.27552   4
  -4  -4  18 45.1242  7.6096   4
  -4  -4  18 47.9718  5.9052   2
  -3  -4  18 28.9394  5.2797   2
  -3  -4  18 21.7342  6.3496   4
   2   4 -18 41.7677  4.5875   1
  -2  -4  18 55.3570  5.3301   2
  -2  -4  18 50.2353  7.1597   4
   1   4 -18 156.891   8.430   1
  -1  -4  18 160.207  10.199   4
   0   4 -18 3.81864 4.75737   1
   0  -4  18 18.8293  6.1170   4
  -1   4 -18 268.892  13.252   1
   1  -4  18 260.068  11.996   4
  -2   4 -18 212.324  12.415   1
   2  -4  18 218.074  10.682   4
  -3   4 -18 1.69688 5.67919   1
  -4   4 -18 0.99438 5.88762   1
  -4  -3  18 -7.9027  5.8365   4
  -4  -3  18 8.31377 5.07888   2
  -3  -3  18 -1.8820  3.5467   2
  -3  -3  18 4.78298 5.75368   4
   2   3 -18 85.1977  5.8216   1
  -2  -3  18 92.5039  6.0633   2
  -2  -3  18 98.1355  8.0295   4
   1   3 -18 51.7607  5.0917   1
  -1  -3  18 56.6202  7.1210   4
   0   3 -18 252.601  12.007   1
   0  -3  18 246.663  11.615   4
  -1   3 -18 -6.3582  3.7687   1
   1  -3  18 1.99949 4.69128   4
  -2   3 -18 2.90487 3.88704   1
   2  -3  18 0.75983 4.30744   4
  -3   3 -18 129.383   9.974   1
   3  -3  18 106.317   7.366   4
  -4   3 -18 14.8227  5.7710   1
  -5  -2  18 5.51911 6.01027   4
  -5  -2  18 -1.9301  4.0017   2
  -4  -2  18 23.4553  4.3415   2
  -4  -2  18 20.5820  4.8670   4
  -4  -2  18 22.7449  4.3874   3
   3   2 -18 101.794   5.773   1
  -3  -2  18 109.219   8.619   4
  -3  -2  18 93.6296  6.1325   3
  -3  -2  18 111.778   7.091   2
   2   2 -18 88.0853  6.1236   1
  -2  -2  18 86.3628  5.2494   3
  -2  -2  18 97.2074  5.9219   2
   1   2 -18 141.835   7.941   1
  -1  -2  18 141.110   6.080   2
   0   2 -18 126.946   8.585   1
  -1   2 -18 24.4666  5.5187   1
  -2   2 -18 96.8369  8.3501   1
  -3   2 -18 -8.4038  5.5771   1
   3  -2  18 4.86198 3.70667   4
  -4   2 -18 81.7122  8.1242   1
  -5  -1  18 -1.8741  3.3256   3
  -5  -1  18 -0.4798  5.2908   2
  -5  -1  18 6.59746 6.04075   4
  -4  -1  18 26.4018  5.9380   2
  -4  -1  18 29.4961  4.8500   3
   3   1 -18 5.65738 3.20967   1
  -3  -1  18 1.00321 3.99689   3
   2   1 -18 125.309   7.453   1
   2   1 -18 130.032   6.860   3
   2   1 -18 123.733   7.009   1
  -2  -1  18 135.106   7.070   3
  -2  -1  18 124.694   6.664   2
   1   1 -18 146.683   8.684   1
   1   1 -18 134.303   6.775   3
  -1  -1  18 140.926   5.842   2
   0   1 -18 38.6813  5.9667   1
   0   1 -18 36.1514  3.9075   3
  -1   1 -18 74.7998  5.3224   3
  -1   1 -18 76.0929  7.5674   1
  -2   1 -18 100.751   8.557   1
  -3   1 -18 4.04531 3.88300   1
  -4   1 -18 9.59321 5.93095   1
  -5   0  18 15.6550  4.1342   3
  -5   0  18 13.4992  5.9471   2
  -4   0  18 126.976   8.038   3
  -4   0  18 114.995   8.422   2
   3   0 -18 41.6458  4.5235   1
  -3   0  18 42.9544  5.2550   2
  -3   0  18 50.0880  5.6770   3
   2   0 -18 20.8463  5.0730   1
   2   0 -18 11.4846  3.1797   1
  -2   0  18 11.5327  3.4331   2
   1   0 -18 6.59245 4.42211   1
   1   0 -18 7.28509 3.30466   3
  -1   0  18 13.6747  2.3910   2
   0   0 -18 126.404   7.058   3
   0   0 -18 126.462   8.814   1
  -1   0 -18 -7.5981  5.1788   1
  -2   0 -18 84.6541  8.1562   1
  -3   0 -18 98.5998  9.1212   1
  -4   0 -18 178.430  12.103   1
  -5   1  18 6.51565 5.41673   3
  -4   1  18 0.54276 4.90000   3
  -3   1  18 14.7194  4.8286   3
   2  -1 -18 114.493   7.530   1
  -2   1  18 104.272   6.730   3
   1  -1 -18 82.6531  7.0633   1
   0  -1 -18 5.54757 5.05302   1
  -1  -1 -18 22.2957  6.2870   1
  -2  -1 -18 108.471   9.199   1
  -3  -1 -18 113.820   9.267   1
  -5   2  18 23.6510  6.1203   3
   4  -2 -18 7.01127 3.97955   1
  -4   2  18 5.17592 5.31671   3
   3  -2 -18 18.9266  4.9789   1
  -3   2  18 18.0510  5.3603   3
   2  -2 -18 1.05700 4.85313   1
  -2   2  18 6.44747 4.80188   3
   1  -2 -18 49.4555  6.8410   1
   0  -2 -18 -0.9362  5.4235   1
  -1  -2 -18 112.271   8.729   1
  -2  -2 -18 83.5351  7.5853   1
  -3  -2 -18 63.7450  7.2571   1
  -5   3  18 44.3952  6.1533   3
   4  -3 -18 -3.3974  4.5272   1
  -4   3  18 3.97426 5.26905   3
   3  -3 -18 -5.7255  5.0737   1
  -3   3  18 2.12904 5.53232   3
   2  -3 -18 4.05047 5.42070   1
  -2   3  18 3.33042 5.01136   3
   1  -3 -18 247.434  13.016   1
   0  -3 -18 28.6366  6.7828   1
  -1  -3 -18 -1.8724  4.7098   1
  -2  -3 -18 36.3551  6.0184   1
   4  -4 -18 -0.3021  5.4720   1
  -4   4  18 12.4860  6.6530   3
   3  -4 -18 0.74224 5.29072   1
  -3   4  18 4.98406 6.28656   3
   2  -4 -18 6.61288 6.04735   1
  -2   4  18 4.42694 5.70827   3
   1  -4 -18 16.5165  6.4573   1
   0  -4 -18 181.786  12.289   1
  -1  -4 -18 298.541  15.890   1
  -2  -4 -18 1.81292 6.11123   1
   3  -5 -18 4.61389 4.45279   1
  -3   5  18 -0.4542  4.5380   3
   2  -5 -18 18.6618  5.2654   1
   0  -5 -18 12.5096  5.8376   1
  -1  -5 -18 5.21741 5.10633   1
   0   7 -19 61.2250  7.3979   1
   0  -7  19 71.6296  8.3533   4
  -2  -6  19 9.23548 6.51167   4
   1   6 -19 39.7846  5.6964   1
   0   6 -19 39.8375  5.8378   1
   0  -6  19 39.5408  7.1307   4
  -1   6 -19 8.33685 5.93565   1
   1  -6  19 -0.6967  5.4945   4
   2  -6  19 14.0851  4.5052   4
  -3  -5  19 -4.3113  6.3335   4
  -2  -5  19 47.4600  7.7150   4
   1   5 -19 5.78476 4.81488   1
  -1  -5  19 -0.3052  4.6024   4
   0   5 -19 134.330   8.965   1
   0  -5  19 137.026   9.041   4
  -1   5 -19 172.640  11.255   1
   1  -5  19 185.406  10.993   4
  -2   5 -19 141.756  10.475   1
   2  -5  19 133.962   9.341   4
  -3   5 -19 35.3723  6.9960   1
   3  -5  19 17.1663  5.3232   4
  -3  -4  19 35.1782  7.3321   4
  -3  -4  19 41.3006  5.9249   2
   2   4 -19 9.34296 4.06601   1
  -2  -4  19 9.99984 5.97282   4
   1   4 -19 473.563  17.884   1
  -1  -4  19 475.738  19.142   4
   0   4 -19 -6.8684  5.3791   1
   0  -4  19 -3.6568  5.8330   4
  -1   4 -19 74.8545  8.0157   1
   1  -4  19 62.2688  6.3307   4
  -2   4 -19 17.0698  6.5235   1
   2  -4  19 15.4758  4.5026   4
  -3   4 -19 -8.3520  5.9072   1
   3  -4  19 6.35026 4.01191   4
  -4  -3  19 25.5396  5.7558   2
  -3  -3  19 147.087   8.702   2
  -3  -3  19 156.408  10.540   4
   2   3 -19 56.1097  5.3138   1
  -2  -3  19 52.5053  4.9839   2
  -2  -3  19 47.8383  6.7340   4
   1   3 -19 13.5295  3.7751   1
  -1  -3  19 5.91608 5.97510   4
   0   3 -19 356.098  15.240   1
   0  -3  19 340.681  14.598   4
  -1   3 -19 128.170   8.691   1
   1  -3  19 122.972   8.654   4
  -2   3 -19 9.86249 5.85992   1
   2  -3  19 13.3267  4.9036   4
  -3   3 -19 31.8537  6.5226   1
   3  -3  19 32.6747  5.2368   4
  -4  -2  19 38.0459  6.3520   2
  -4  -2  19 41.7258  5.9220   4
  -3  -2  19 77.6868  8.2499   4
  -3  -2  19 66.2413  6.1685   2
  -3  -2  19 59.4882  5.3282   3
   2   2 -19 82.2009  6.1793   1
  -2  -2  19 77.0415  5.3569   2
  -2  -2  19 66.9420  4.8286   3
   1   2 -19 158.754   9.011   1
  -1  -2  19 136.394   5.945   2
   0   2 -19 100.232   8.028   1
  -1   2 -19 15.3636  5.7238   1
  -2   2 -19 117.522   8.551   1
  -3   2 -19 0.25802 4.01594   1
   3  -2  19 2.08573 4.01918   4
  -5  -1  19 6.26984 4.47184   3
  -5  -1  19 -3.3422  5.6276   2
  -5  -1  19 -6.5464  6.0916   4
  -4  -1  19 55.4686  6.4931   4
  -4  -1  19 37.0895  5.6480   2
  -4  -1  19 51.0718  5.4997   3
   3   1 -19 249.942  10.253   1
  -3  -1  19 243.114  10.785   3
  -3  -1  19 232.050  10.795   2
   2   1 -19 57.6639  5.2375   1
  -2  -1  19 74.8459  5.5048   3
  -2  -1  19 61.7113  4.8371   2
   1   1 -19 23.4017  4.8734   1
  -1  -1  19 16.0392  2.3619   2
   0   1 -19 139.908   9.316   1
  -1   1 -19 9.89827 5.16817   1
  -2   1 -19 29.8881  5.3884   1
  -3   1 -19 35.2257  6.8992   1
  -5   0  19 5.27960 4.93326   3
  -5   0  19 3.82045 5.32743   2
  -4   0  19 9.22989 5.20889   2
  -4   0  19 4.92032 4.46226   3
   3   0 -19 34.7793  4.6775   1
  -3   0  19 41.6165  5.2636   2
  -3   0  19 38.2848  4.6751   3
   2   0 -19 171.623   9.448   1
  -2   0  19 162.566   8.644   3
  -2   0  19 180.133   8.014   2
   1   0 -19 7.52277 4.53938   1
   0   0 -19 154.480  10.003   1
  -1   0 -19 16.4111  4.7903   1
  -3   0 -19 28.9220  5.9753   1
  -5   1  19 -0.1760  4.3100   2
  -5   1  19 1.94130 5.04220   3
  -4   1  19 4.05518 4.75486   3
   3  -1 -19 3.74985 4.09048   1
  -3   1  19 6.18415 5.04942   3
   2  -1 -19 67.3392  6.6746   1
  -2   1  19 61.9229  6.4206   3
   1  -1 -19 62.3864  7.2500   1
   0  -1 -19 47.7892  6.8078   1
  -1  -1 -19 16.0065  6.2290   1
  -2  -1 -19 55.1497  7.0730   1
  -3  -1 -19 71.4029  8.5292   1
  -4   2  19 5.10378 4.07766   3
   3  -2 -19 -2.5496  4.3102   1
  -3   2  19 3.19146 5.27841   3
  -2   2  19 12.3538  5.0976   3
   1  -2 -19 143.129   9.924   1
   0  -2 -19 30.7142  6.6441   1
  -1  -2 -19 136.575   9.457   1
  -2  -2 -19 -3.5642  6.2951   1
  -4   3  19 6.23415 5.67537   3
   3  -3 -19 37.2127  6.2587   1
  -3   3  19 39.5134  7.0506   3
   2  -3 -19 3.57166 5.07089   1
  -2   3  19 16.8909  5.8261   3
   1  -3 -19 6.12306 4.51859   1
   0  -3 -19 22.9040  7.2744   1
  -1  -3 -19 24.0528  5.6317   1
  -2  -3 -19 65.8269  7.4283   1
   3  -4 -19 3.34167 5.85246   1
  -3   4  19 15.1344  6.5083   3
   2  -4 -19 59.6416  6.6410   1
   1  -4 -19 4.38950 5.06351   1
   0  -4 -19 99.7336 10.2264   1
  -1  -4 -19 114.000  11.013   1
   2  -5 -19 20.0127  7.1051   1
   1  -5 -19 34.8436  7.7093   1
   1   6 -20 2.24041 4.95640   1
  -1  -6  20 10.0642  4.9722   4
   0   6 -20 -0.0781  5.4887   1
   0  -6  20 14.7133  4.9337   4
  -1   6 -20 85.6665  7.5922   1
   1  -6  20 70.6788  8.3040   4
   1   5 -20 68.8072  7.0091   1
  -1  -5  20 79.5813  7.5133   4
   0   5 -20 13.5048  5.9741   1
   0  -5  20 4.00507 5.72325   4
  -1   5 -20 3.48295 6.49513   1
   1  -5  20 6.32329 5.79290   4
  -2   5 -20 30.8168  7.0650   1
   2  -5  20 40.7811  6.7067   4
  -3  -4  20 86.0750  6.9886   2
  -3  -4  20 100.341   9.388   4
  -2  -4  20 -5.9713  6.4070   4
   1   4 -20 156.202   9.400   1
  -1  -4  20 139.236  10.779   4
   0   4 -20 53.4119  6.8238   1
   0  -4  20 69.7256  7.9632   4
  -1   4 -20 259.542  13.495   1
   1  -4  20 251.953  12.402   4
  -2   4 -20 7.65531 6.24965   1
   2  -4  20 9.23708 4.60414   4
  -3  -3  20 62.5263  8.1509   4
  -3  -3  20 50.0616  5.9502   2
   2   3 -20 61.1782  5.7737   1
  -2  -3  20 66.4894  5.2880   2
  -2  -3  20 80.7225  8.2052   4
   1   3 -20 13.8878  4.5981   1
  -1  -3  20 26.6179  6.8016   4
   0   3 -20 -3.0466  5.3359   1
   0  -3  20 18.2293  6.2441   4
  -1   3 -20 8.62447 5.64047   1
   1  -3  20 1.95837 5.29407   4
  -2   3 -20 7.80466 5.98329   1
   2  -3  20 2.19547 4.61165   4
  -3   3 -20 78.0515  7.9013   1
   3  -3  20 89.9153  7.4007   4
  -4  -2  20 95.1994  8.1610   4
  -4  -2  20 87.1220  7.8405   2
  -3  -2  20 44.8670  7.5978   4
  -3  -2  20 46.9678  5.7491   2
   2   2 -20 3.85536 4.21723   1
  -2  -2  20 1.04827 3.03282   2
  -2  -2  20 5.82062 4.42939   4
   1   2 -20 154.690   9.348   1
   0   2 -20 17.5261  5.0958   1
  -1   2 -20 3.81321 4.74980   1
  -2   2 -20 11.5989  6.0524   1
   2  -2  20 7.51671 3.74023   4
  -3   2 -20 59.3292  8.1853   1
   3  -2  20 45.1416  5.9256   4
  -4  -1  20 55.1753  5.7162   3
  -4  -1  20 58.5644  6.6022   2
  -4  -1  20 54.8268  7.5067   4
  -3  -1  20 1.21766 4.18138   3
  -3  -1  20 7.33435 4.48420   2
   2   1 -20 5.22918 4.57138   1
  -2  -1  20 7.46579 3.09665   2
   1   1 -20 2.86944 4.84263   1
   0   1 -20 22.5383  5.8079   1
  -1   1 -20 71.2841  7.7345   1
  -2   1 -20 -2.4132  5.6388   1
  -3   1 -20 24.9173  6.7303   1
  -4   0  20 52.5747  6.6784   2
  -4   0  20 45.1246  5.9879   3
   3   0 -20 116.107   7.401   1
  -3   0  20 110.003   7.848   3
  -3   0  20 106.842   7.389   2
   2   0 -20 33.6064  5.4402   1
  -2   0  20 37.4521  4.1988   2
  -2   0  20 29.4841  5.2111   3
   1   0 -20 70.0970  7.2309   1
   0   0 -20 91.9751  7.6348   1
  -1   0 -20 -8.4601  5.8756   1
  -2   0 -20 43.3327  6.3919   1
  -4   1  20 7.76576 5.27465   3
   3  -1 -20 1.87674 3.87890   1
  -3   1  20 3.06145 4.85993   3
   2  -1 -20 33.3077  5.9507   1
  -2   1  20 34.5319  5.7359   3
   1  -1 -20 53.4293  7.2879   1
   0  -1 -20 30.4389  5.5028   1
  -1  -1 -20 59.2589  7.5891   1
  -2  -1 -20 24.7199  7.0625   1
  -4   2  20 2.16606 5.68479   3
   3  -2 -20 33.3330  5.6014   1
  -3   2  20 27.8918  5.7826   3
   2  -2 -20 43.8760  5.6445   1
  -2   2  20 48.7278  5.6481   3
   1  -2 -20 5.06143 5.74733   1
  -1  -2 -20 46.6222  7.6074   1
  -2  -2 -20 -2.8942  6.6108   1
   3  -3 -20 -3.6477  4.9034   1
   2  -3 -20 40.0368  6.8595   1
   1  -3 -20 31.2264  6.7111   1
   0  -3 -20 64.7736  8.5581   1
  -1  -3 -20 11.7850  5.3402   1
   2  -4 -20 9.70753 6.50819   1
   1  -4 -20 5.46424 6.59718   1
   0  -4 -20 51.2489  8.4829   1
   1   5 -21 2.37646 3.91983   1
  -1  -5  21 -0.7604  5.6013   4
   0  -5  21 20.4906  6.4669   4
  -1   5 -21 85.8968  9.0719   1
   1  -5  21 77.1645  8.3978   4
  -2  -4  21 31.2490  7.2990   4
  -1  -4  21 4.40311 6.35593   4
   0   4 -21 -0.3309  5.0649   1
   0  -4  21 1.08773 5.91338   4
  -1   4 -21 5.30675 4.75418   1
   1  -4  21 15.0600  5.1658   4
  -2   4 -21 7.59902 6.45269   1
   2  -4  21 11.2663  5.2087   4
  -3  -3  21 10.7606  6.5200   4
  -2  -3  21 6.00257 6.24293   4
   1   3 -21 44.2133  6.1545   1
  -1  -3  21 54.0731  7.7652   4
   0   3 -21 26.9961  4.9942   1
   0  -3  21 41.6859  6.9773   4
  -1   3 -21 -2.0943  5.6177   1
   1  -3  21 -5.3097  5.5207   4
  -2   3 -21 34.0895  7.3455   1
   2  -3  21 22.6728  5.9149   4
  -3  -2  21 8.75923 6.80499   4
   2   2 -21 6.49496 4.08652   1
  -2  -2  21 -1.9268  6.3596   4
   1   2 -21 7.11520 4.53575   1
   0   2 -21 0.39547 5.14195   1
  -1   2 -21 16.0920  6.1431   1
  -2   2 -21 84.2235  8.9744   1
   2  -2  21 87.0824  8.0769   4
  -3  -1  21 9.06345 4.35930   2
   2   1 -21 191.546  10.219   1
   1   1 -21 2.76831 4.58374   1
   0   1 -21 -5.7544  5.0281   1
  -1   1 -21 63.7733  7.9207   1
  -2   1 -21 24.3508  5.5608   1
  -3   0  21 8.70852 4.97931   3
  -3   0  21 0.37569 4.31311   2
   2   0 -21 -6.5345  4.1080   1
   1   0 -21 11.4803  5.7412   1
   0   0 -21 165.992  11.113   1
  -1   0 -21 -11.389   6.333   1
  -2   0 -21 51.3838  7.9674   1
   3  -1 -21 40.7514  5.7068   1
  -3   1  21 60.1039  6.8130   3
   2  -1 -21 119.496   9.034   1
   1  -1 -21 92.9934  8.6305   1
   0  -1 -21 -0.6996  5.5762   1
  -1  -1 -21 24.8080  6.2996   1
   3  -2 -21 16.5421  5.5489   1
  -3   2  21 1.90187 5.30859   3
   2  -2 -21 11.1486  5.8531   1
   1  -2 -21 45.9724  7.4885   1
   0  -2 -21 83.7986  9.1979   1
  -1  -2 -21 2.22739 6.43162   1
   2  -3 -21 4.28294 6.23045   1
   1  -3 -21 2.38052 6.26451   1
   0  -3 -21 10.3824  6.8173   1
   1   4 -22 4.64000 5.03898   1
  -1  -4  22 13.2850  5.9127   4
   0   4 -22 161.441   9.801   1
   0  -4  22 157.556  11.061   4
   1   3 -22 16.7364  5.4269   1
  -1  -3  22 0.44121 5.54892   4
   0   3 -22 2.02570 5.40545   1
   0  -3  22 2.25780 5.93242   4
  -1   3 -22 30.8378  6.6623   1
   1  -3  22 32.4329  5.5755   4
   2   2 -22 3.84596 4.35597   1
  -2  -2  22 19.9284  7.2607   4
   1   2 -22 27.5385  6.1139   1
   0   2 -22 12.5424  5.6764   1
  -1   2 -22 44.5653  7.3980   1
   2   1 -22 44.3196  6.0604   1
   1   1 -22 10.6629  5.7190   1
   0   1 -22 60.5412  7.9535   1
  -1   1 -22 73.5707  8.7490   1
   2   0 -22 0.65227 5.08178   1
   1   0 -22 0.53957 5.76753   1
   0   0 -22 30.3344  6.9621   1
  -1   0 -22 23.2671  5.7134   1
   2  -1 -22 10.3645  6.3313   1
   1  -1 -22 139.445  10.545   1
   0  -1 -22 35.1569  7.5327   1
   0   0   0    0.00    0.00   0
;
_shelx_hkl_checksum   62202
